# Supplementary material for: Enigmazole C: A Cytotoxic Macrocyclic Lactone and Its Ring-Opened Derivatives from a New Species of Homophymia Sponge
Source: PubMed Central journal article supplement (PMC9040057; doi:10.1021/acs.jnatprod.1c01179), 2022-03-02
Supplement: np1c01179_si_001.pdf [file np1c01179_si_001.pdf]

## SUPPLEMENTARY MATERIAL

### **Enigmazole C: A Cytotoxic Macrocyclic Lactone and its Ring-Opened Derivatives from a New Species of *Homophymia* Sponge**

*Guillermo Tarazona [a], Rogelio Fernández [a], Marta Pérez[a],*

*Ramón E. Millán [b] Carlos Jiménez\*[b], Jaime Rodríguez\*[b], and Carmen Cuevas[a]*

[a] R&D,PharmaMar, Avda. De los Reyes, 1, Pol. Ind. La Mina-Norte, 28770-Colmenar Viejo, Madrid, Spain

[b] Departamento de Química, Facultad de Ciencias and Centro de Investigacions Científicas Avanzadas (CICA) Universidade de A Coruña, 15071 A Coruña, Spain.

**E-mail:** [carlos.jimenez@udc.es](mailto:carlos.jimenez@udc.es); [jaime.rodriguez@udc.es](mailto:jaime.rodriguez@udc.es)

|                                                                                                                                                      |     |
|------------------------------------------------------------------------------------------------------------------------------------------------------|-----|
| Figure S1. <sup>1</sup> H NMR spectrum (500 MHz, CD <sub>3</sub> CN) of enigmazole C ( <b>1</b> ).....                                               | S4  |
| Figure S2. <sup>13</sup> C NMR spectrum (125 MHz, CD <sub>3</sub> CN) of enigmazole C ( <b>1</b> ).....                                              | S5  |
| Figure S3. DEPT135 Edited-HSQC spectrum (500 MHz, CD <sub>3</sub> CN) of enigmazole C ( <b>1</b> ). .....                                            | S6  |
| Figure S4. <sup>1</sup> H- <sup>1</sup> H COSY spectrum (500 MHz, CD <sub>3</sub> CN) of enigmazole C ( <b>1</b> ). .....                            | S7  |
| Figure S5. HMBC spectrum (500 MHz, CD <sub>3</sub> CN) of enigmazole C ( <b>1</b> ). .....                                                           | S8  |
| Figure S6. <sup>1</sup> H- <sup>1</sup> H TOSCY spectrum (500 MHz, CD <sub>3</sub> CN) of enigmazole C ( <b>1</b> ). .....                           | S9  |
| Figure S7. <sup>1</sup> H- <sup>1</sup> H ROESY spectrum (500 MHz, CD <sub>3</sub> CN) of enigmazole C ( <b>1</b> ). .....                           | S10 |
| Figure S8. <sup>1</sup> H-NMR spectrum (500 MHz, C <sub>5</sub> D <sub>5</sub> N) of enigmazole C-R-MPTA ( <b>1-R</b> ).....                         | S11 |
| Figure S9. Selective 1D-TOCSY (500 MHz, C <sub>5</sub> D <sub>5</sub> N) of H5 in enigmazole C –R-MPTA ( <b>1-R</b> ) .....                          | S12 |
| Figure S10. <sup>1</sup> H NMR spectrum (500 MHz, C <sub>5</sub> D <sub>5</sub> N) of enigmazole C-S-MPTA ( <b>1-S</b> ).....                        | S13 |
| Figure S11. Selective 1D-TOCSY (500 MHz, C <sub>5</sub> D <sub>5</sub> N) of H5 in enigmazole C –S-MPTA ( <b>1-S</b> ) .....                         | S14 |
| Figure S12. <sup>1</sup> H NMR spectrum (500 MHz, acetone-d <sub>6</sub> ) of enigmazole C ( <b>1</b> ).....                                         | S15 |
| Figure S13. <sup>13</sup> C NMR spectrum (125 MHz, acetone-d <sub>6</sub> ) of enigmazole C ( <b>1</b> ).....                                        | S16 |
| Figure S14. HSQC-HECADE spectrum (500 MHz, acetone-d <sub>6</sub> ) of enigmazole C ( <b>1</b> ).....                                                | S17 |
| Figure S15. J-HMBC spectrum (500 MHz, acetone-d <sub>6</sub> ) of enigmazole C ( <b>1</b> ) (J-scale =53) .....                                      | S18 |
| Figure S16. J-HMBC spectrum (500 MHz, acetone-d <sub>6</sub> ) of enigmazole C ( <b>1</b> ) (J-scale =55) .....                                      | S19 |
| Figure S17. J-HMBC spectrum (500 MHz, acetone-d <sub>6</sub> ) of enigmazole C ( <b>1</b> ) (J-scale =55) .....                                      | S20 |
| Figure S18. J-HMBC spectrum (500 MHz, acetone-d <sub>6</sub> ) of enigmazole C ( <b>1</b> ) (J-scale =55) .....                                      | S21 |
| Figure S19. J-HMBC spectrum (500 MHz, acetone-d <sub>6</sub> ) of enigmazole C ( <b>1</b> ) (J-scale =55) .....                                      | S22 |
| Figure S20. HSQC-HECADE spectrum (500 MHz, acetone-d <sub>6</sub> ) of enigmazole C ( <b>1</b> ).....                                                | S23 |
| Figure S21. HSQC-HECADE C3alfa and C3beta projections from the HSQC-HECADE (500 MHz,<br>acetone-d <sub>6</sub> ) of enigmazole C ( <b>1</b> ).....   | S24 |
| Figure S22. HSQC-HECADE C10alfa and C10beta projections from the HSQC-HECADE (500 MHz,<br>acetone-d <sub>6</sub> ) of enigmazole C ( <b>1</b> )..... | S25 |
| Figure S23. HSQC-HECADE spectrum expansion (500 MHz, acetone-d <sub>6</sub> ) of enigmazole C ( <b>1</b> ) .                                         | S26 |
| Figure S24. HSQC-HECADE C27alfa and C27beta projections from the HSQC-HECADE (500 MHz,<br>acetone-d <sub>6</sub> ) of enigmazole C ( <b>1</b> )..... | S27 |
| Figure S25. <sup>1</sup> H NMR spectrum (500 MHz, CD <sub>3</sub> OD) of enigmazole C ( <b>1</b> ). .....                                            | S28 |
| Figure S26. <sup>13</sup> C NMR spectrum (125 MHz, CD <sub>3</sub> OD) of enigmazole C ( <b>1</b> ). .....                                           | S29 |
| Figure S27. <sup>1</sup> H- <sup>13</sup> C Edited-HSQC spectrum (500 MHz, CD <sub>3</sub> OD) of enigmazole C ( <b>1</b> ).....                     | S30 |
| Figure S28. <sup>1</sup> H- <sup>1</sup> H COSY spectrum (500 MHz, CD <sub>3</sub> OD) of enigmazole C ( <b>1</b> ).....                             | S31 |
| Figure S29. LR-ESIMS (+) of enigmazole C ( <b>1</b> ).....                                                                                           | S32 |
| Figure S30. UV (MeOH) spectrum of enigmazole C ( <b>1</b> ). .....                                                                                   | S33 |
| Figure S31. <sup>1</sup> H NMR spectrum (500 MHz, CD <sub>3</sub> OD) of enigmazole E ( <b>2</b> ). .....                                            | S34 |

|                                                                                                                           |      |
|---------------------------------------------------------------------------------------------------------------------------|------|
| Figure S32. <sup>13</sup> C NMR spectrum (125 MHz, CD <sub>3</sub> OD) of enigmazole E ( <b>2</b> ).....                  | S35  |
| Figure S33. <sup>1</sup> H- <sup>1</sup> H COSY spectrum (500 MHz, CD <sub>3</sub> OD) of enigmazole E ( <b>2</b> ).....  | S36  |
| Figure S34. <sup>1</sup> H- <sup>1</sup> H TOCSY spectrum (500 MHz, CD <sub>3</sub> OD) of enigmazole E ( <b>2</b> )..... | S37  |
| Figure S35. DEPT135-Edited HSQC spectrum (500 MHz, CD <sub>3</sub> OD) of enigmazole E ( <b>2</b> ).....                  | S38  |
| Figure S36. HMBC spectrum (500 MHz, CD <sub>3</sub> OD) of enigmazole E ( <b>2</b> ).....                                 | S39  |
| Figure S37. UV (MeOH) spectrum of enigmazole E ( <b>2</b> ).....                                                          | S40  |
| Table S1. NMR data in CD <sub>3</sub> OD of enigmazole E ( <b>2</b> ).....                                                | S41  |
| Figure S38. <sup>1</sup> H NMR spectrum (500 MHz, CD <sub>3</sub> OD) of enigmazole D ( <b>3</b> ).....                   | S42  |
| Figure S39. <sup>1</sup> H- <sup>1</sup> H COSY spectrum (500 MHz, CD <sub>3</sub> OD) of enigmazole D ( <b>3</b> ).....  | S43  |
| Figure S40. Edited-HSQC spectrum (500 MHz, CD <sub>3</sub> CN) of enigmazole D ( <b>3</b> ).....                          | S44  |
| Figure S41. UV (MeOH) spectrum of enigmazole D ( <b>3</b> ).....                                                          | S45  |
| Table S2. NMR data in CD <sub>3</sub> CN of enigmazole D ( <b>3</b> ).....                                                | S46  |
| Table S3. Calculated DFT energies of the <b>1a-(2S5R11R13R17S23R)</b> diastereoisomer.....                                | S47  |
| Table 4. Calculated DFT energies of the <b>1b-(2S5R11S13S17S23S)</b> diastereoisomer.....                                 | S76  |
| Table 5. Calculated DFT energies of the <b>1c-(2S5R11S13S17S23R)</b> diastereoisomer.....                                 | S144 |
| Table 6. Calculated DFT energies of the <b>1d-(2S5R11R13R17S23S)</b> diastereoisomer.....                                 | S195 |

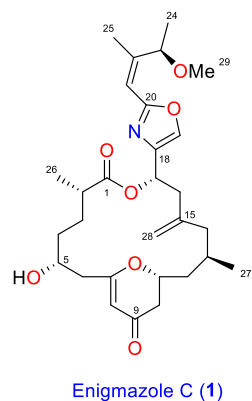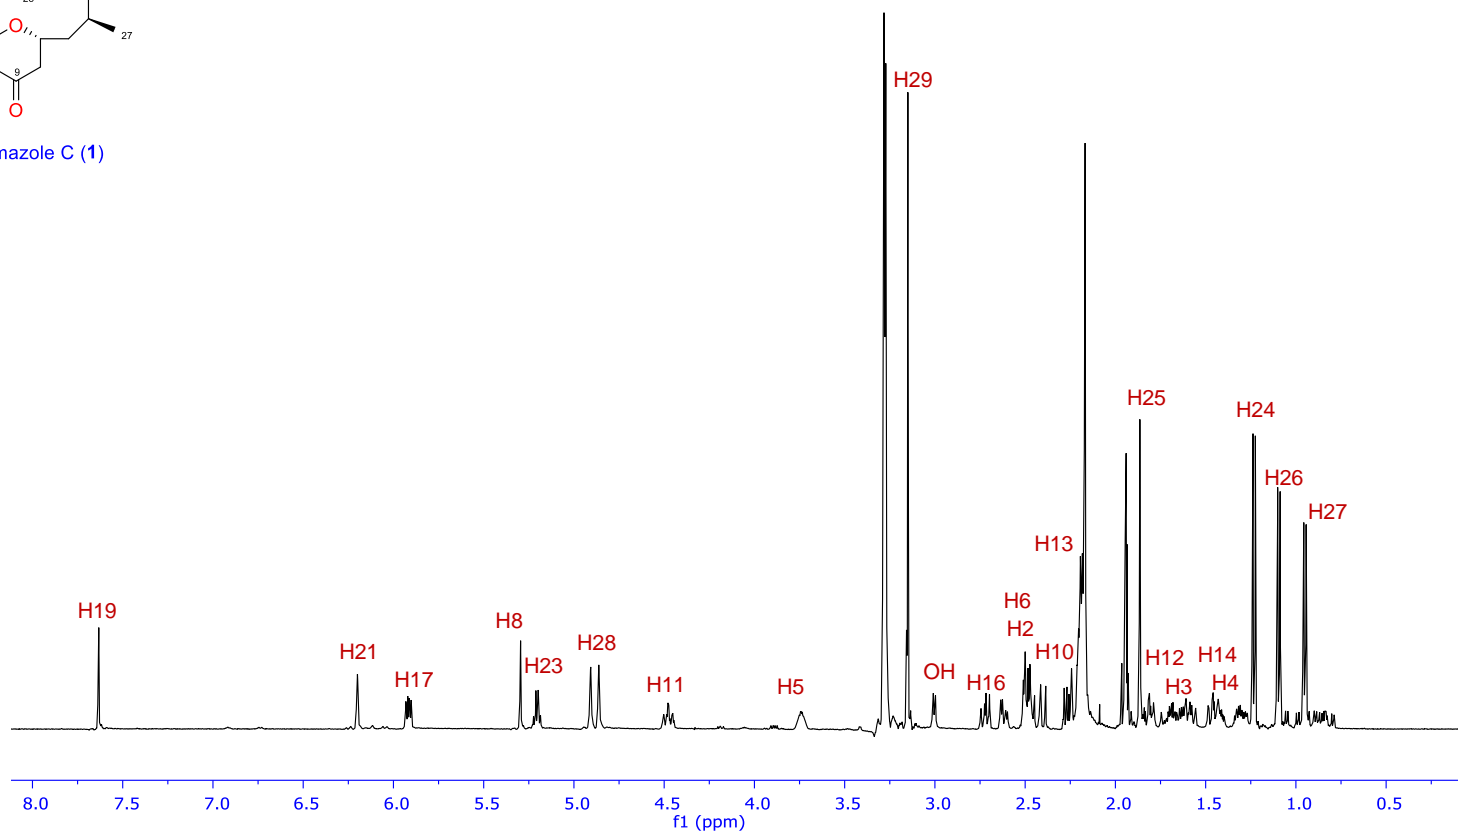

Figure S1. <sup>1</sup>H NMR spectrum (500 MHz, CD<sub>3</sub>CN) of enigmazole C (1).

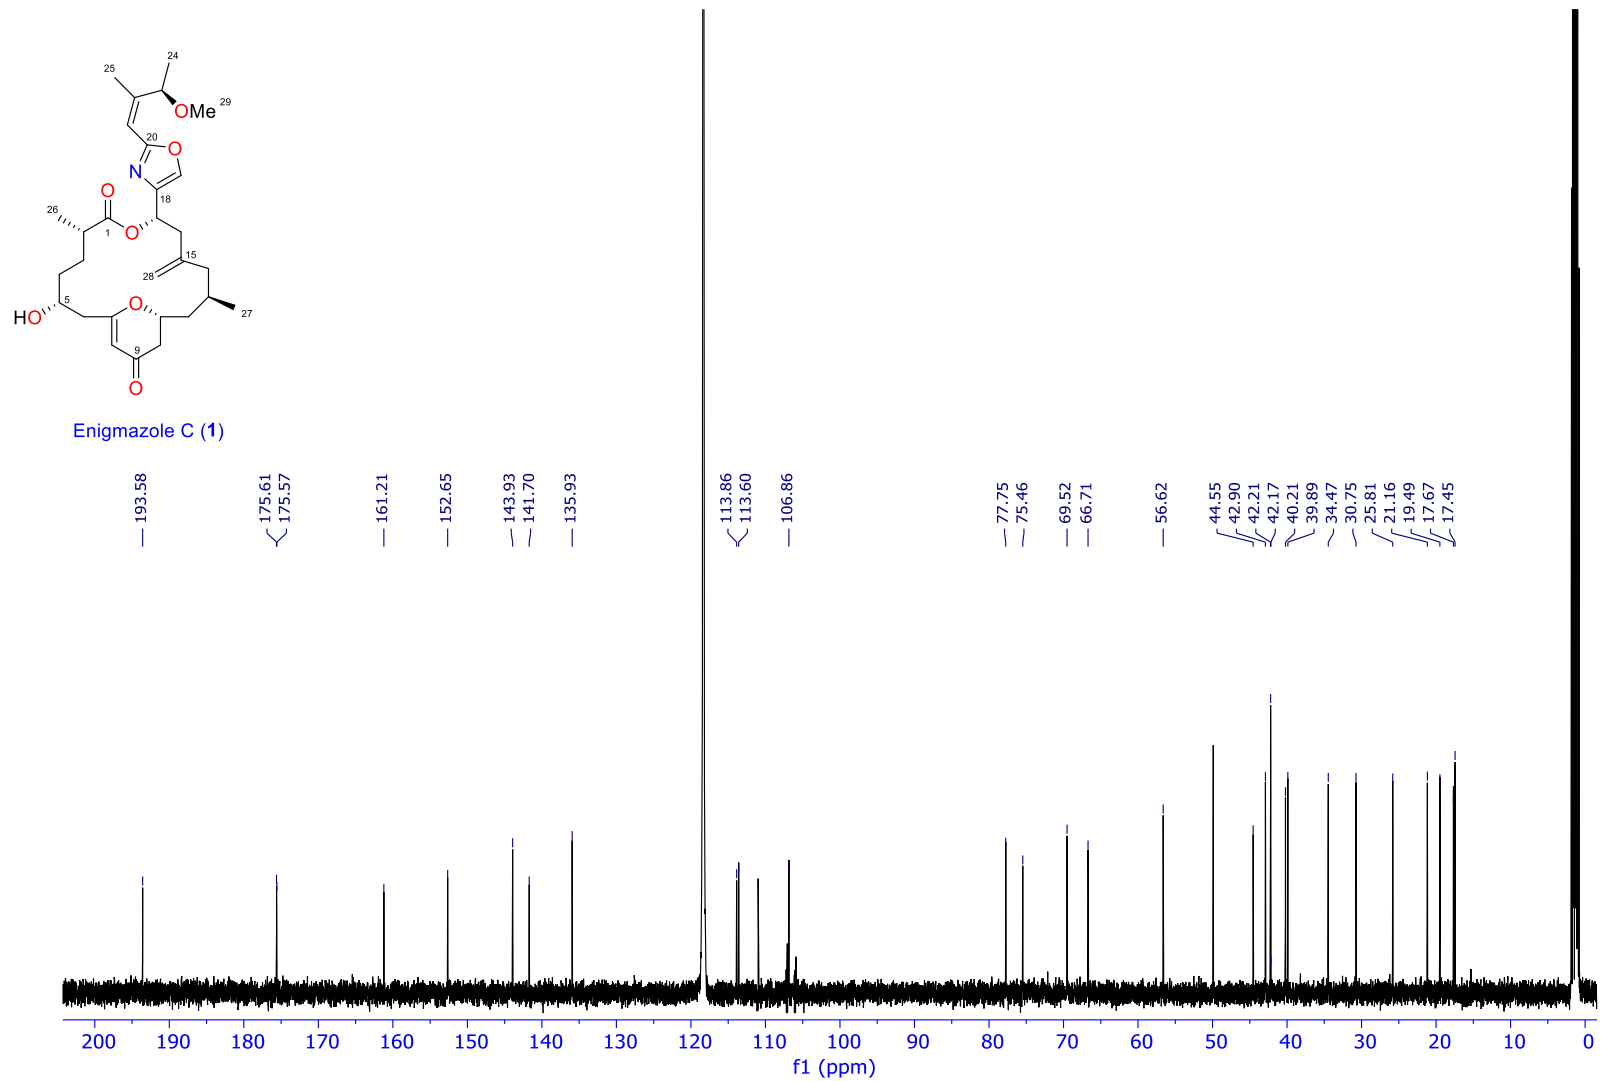

Figure S2. <sup>13</sup>C NMR spectrum (125 MHz, CD<sub>3</sub>CN) of enigmazole C (1).

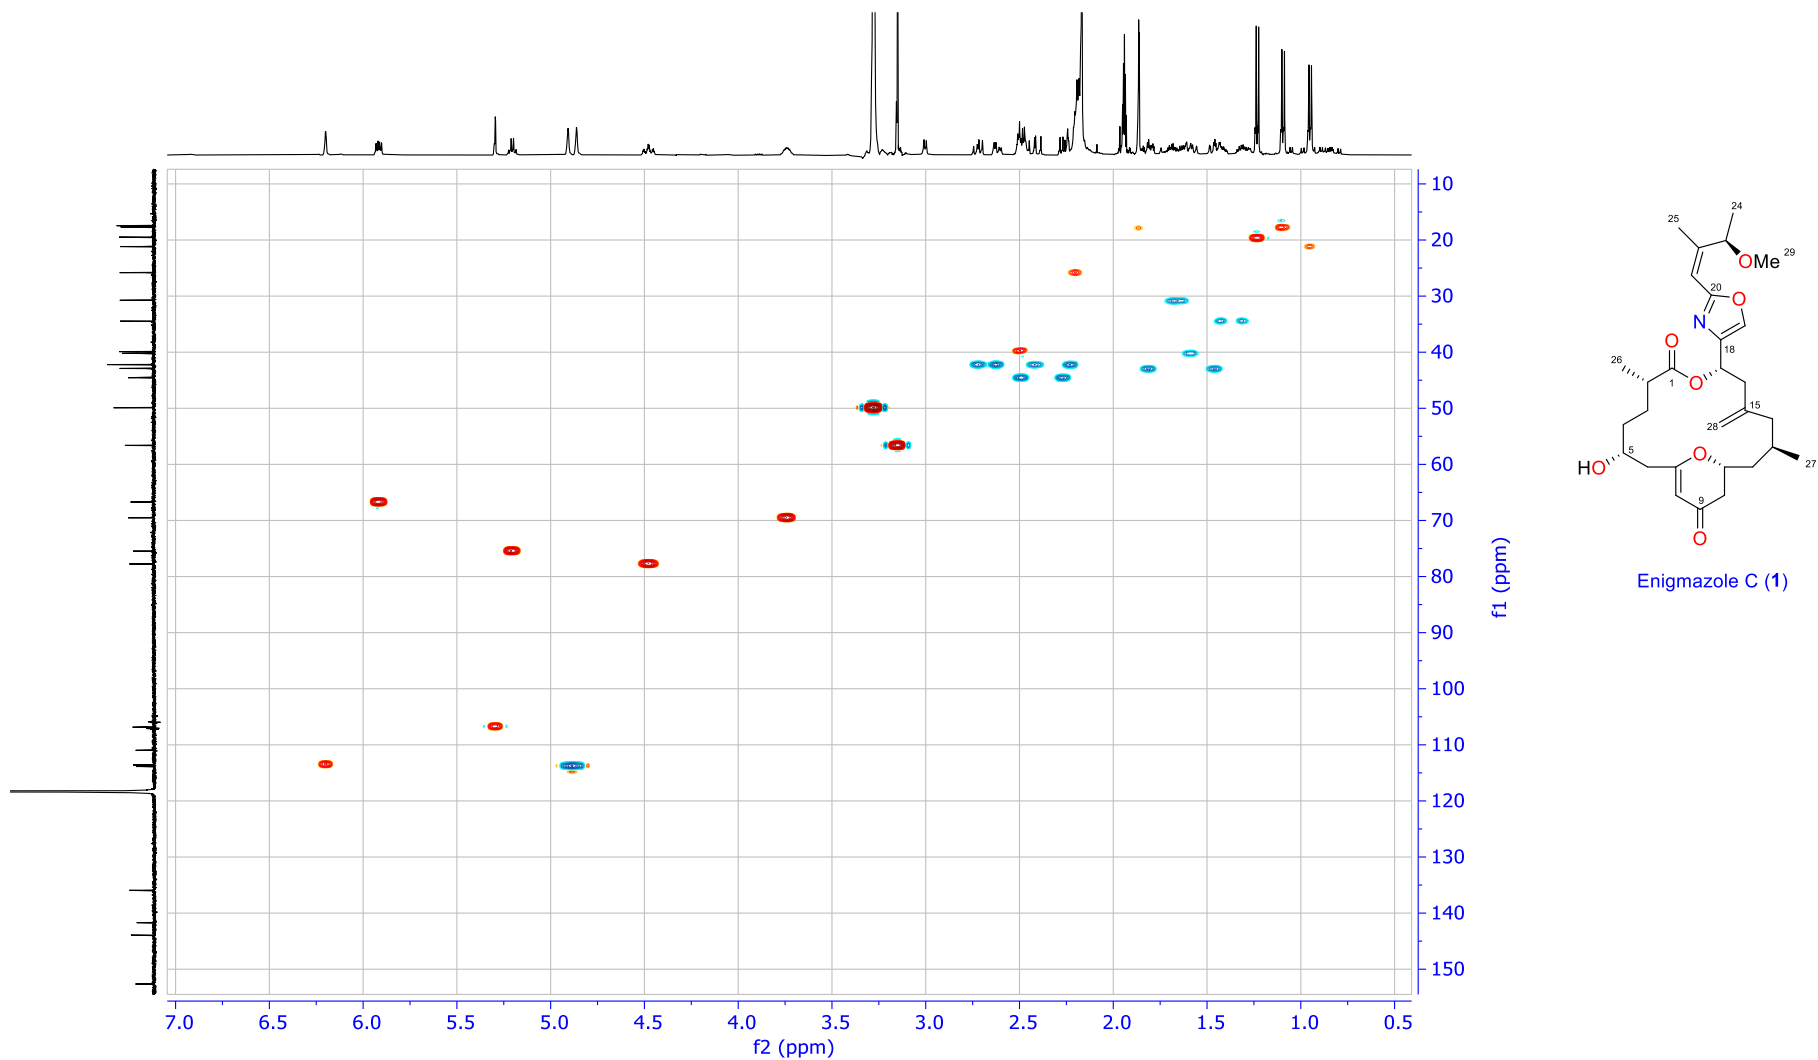

**Figure S3.** DEPT135 Edited-HSQC spectrum (500 MHz, CD<sub>3</sub>CN) of enigmazole C (1).

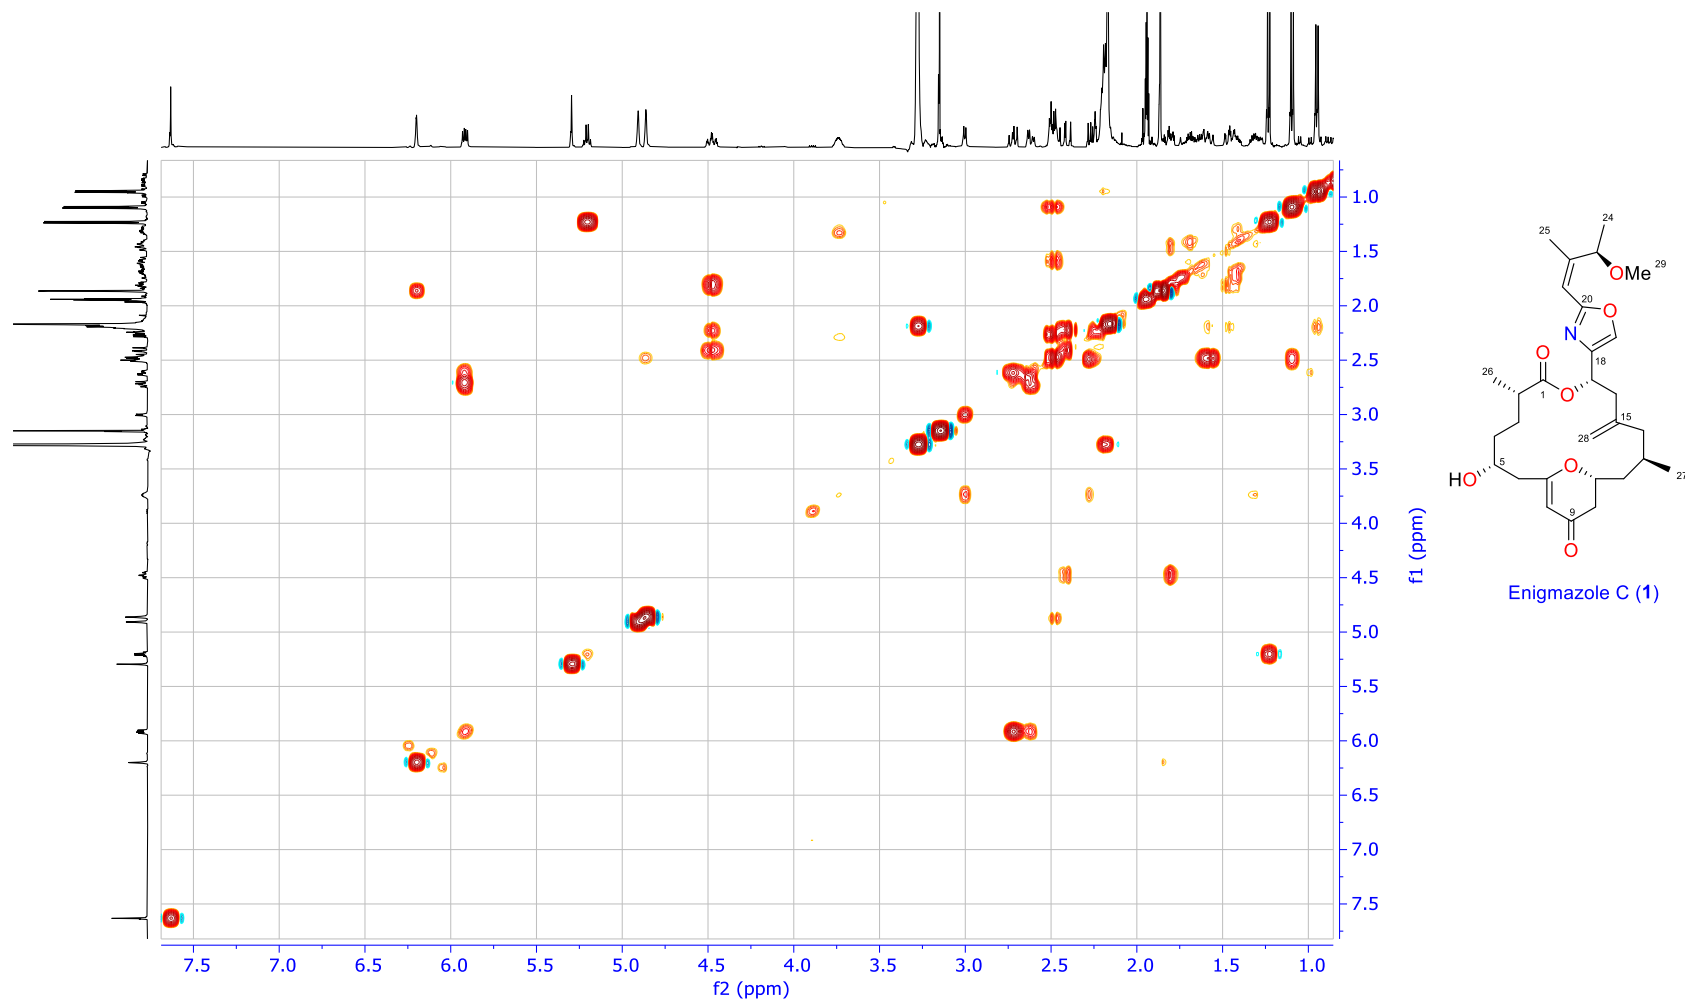

Figure S4.  $^1\text{H}$ - $^1\text{H}$  COSY spectrum (500 MHz,  $\text{CD}_3\text{CN}$ ) of enigmazole C (**1**).

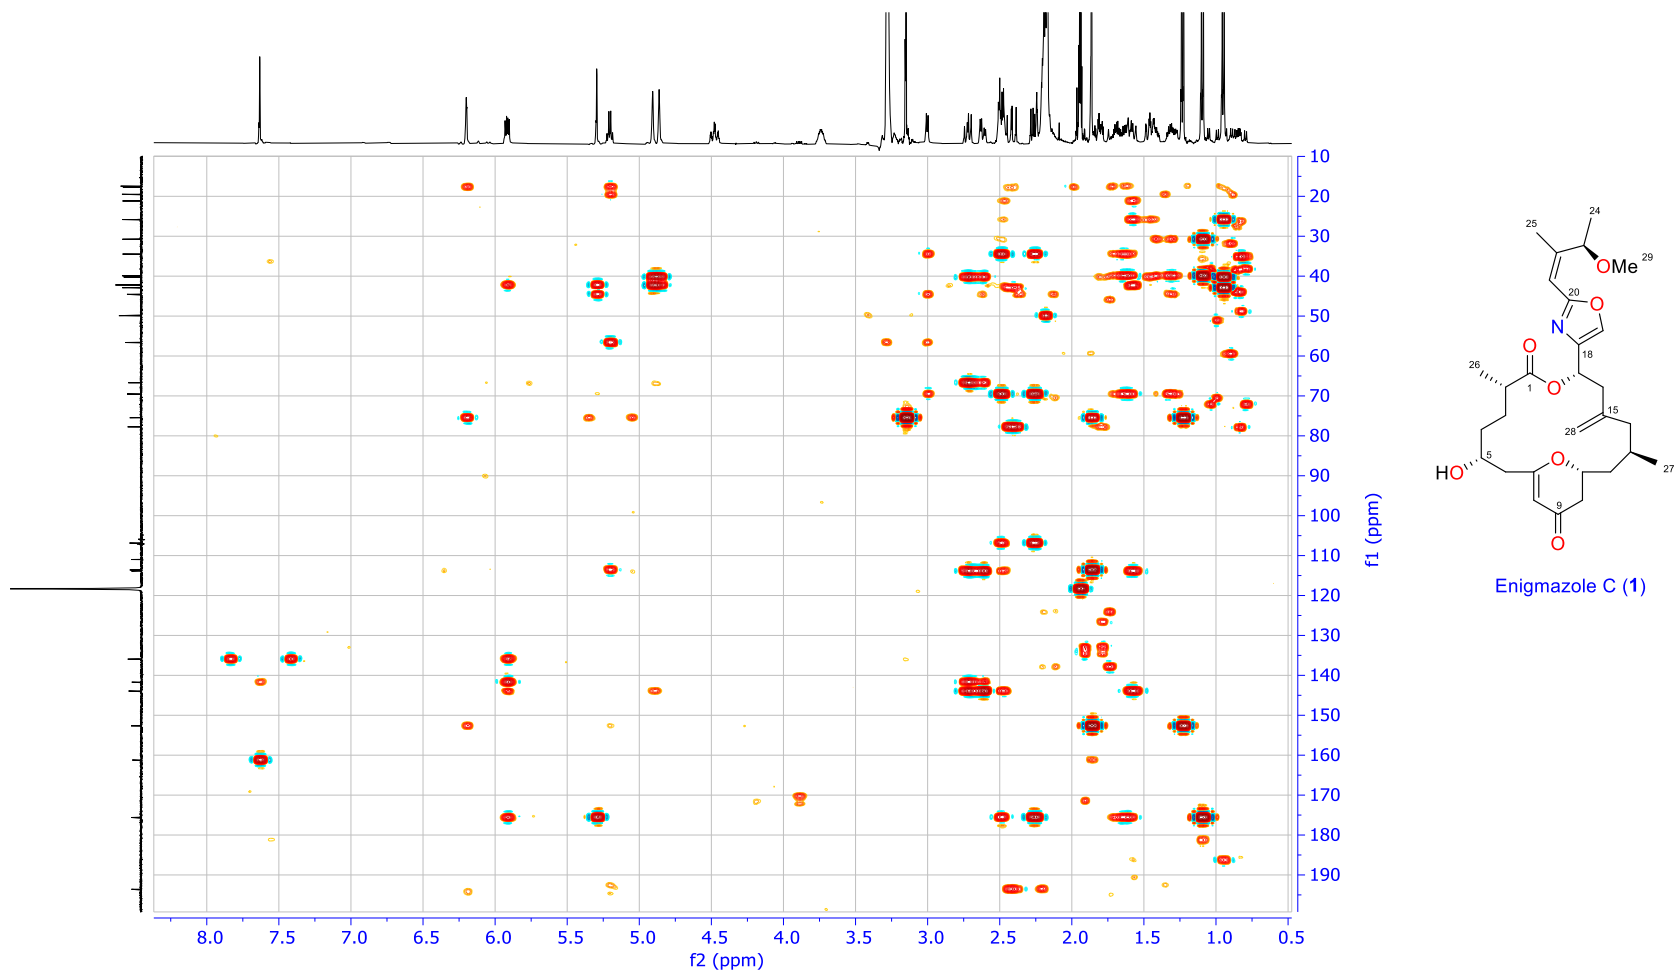

Figure S5. HMBC spectrum (500 MHz, CD<sub>3</sub>CN) of enigmazole C (1).



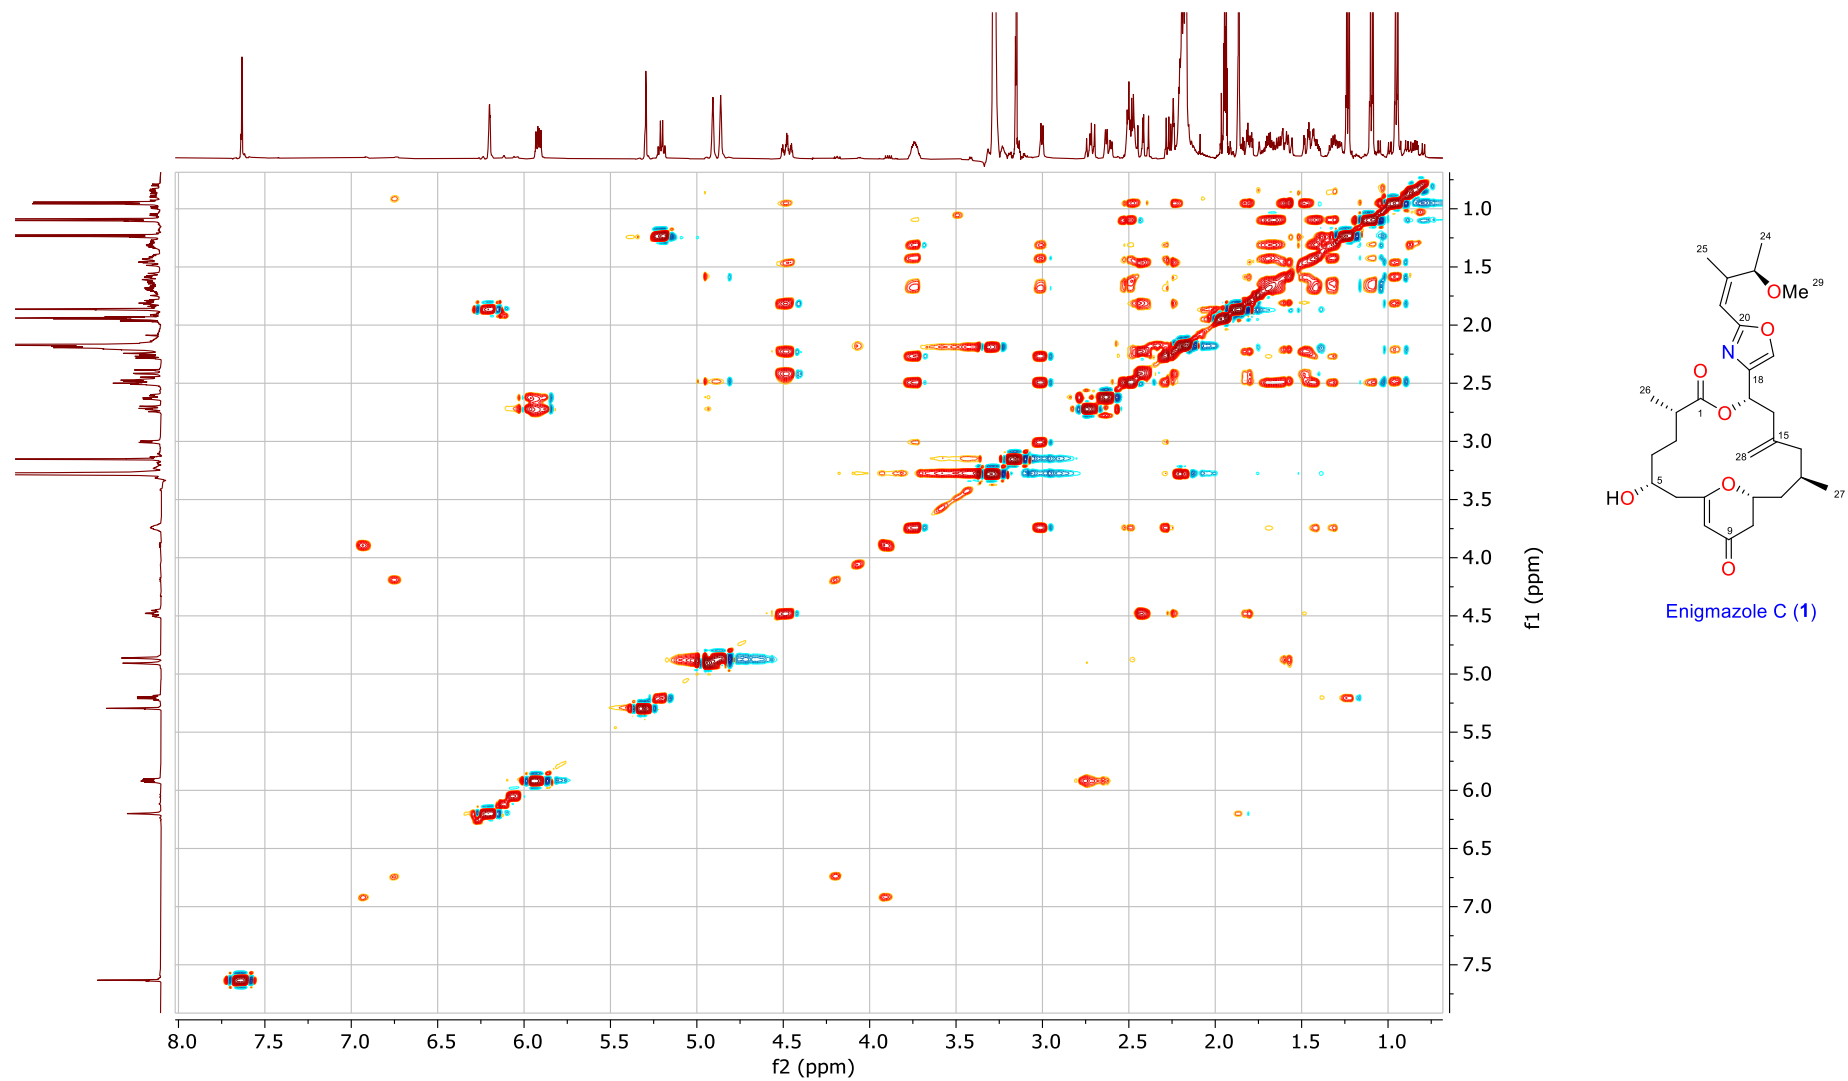

Figure S6.  $^1\text{H}$ - $^1\text{H}$  TOSCY spectrum (500 MHz,  $\text{CD}_3\text{CN}$ ) of enigmazole C (**1**).

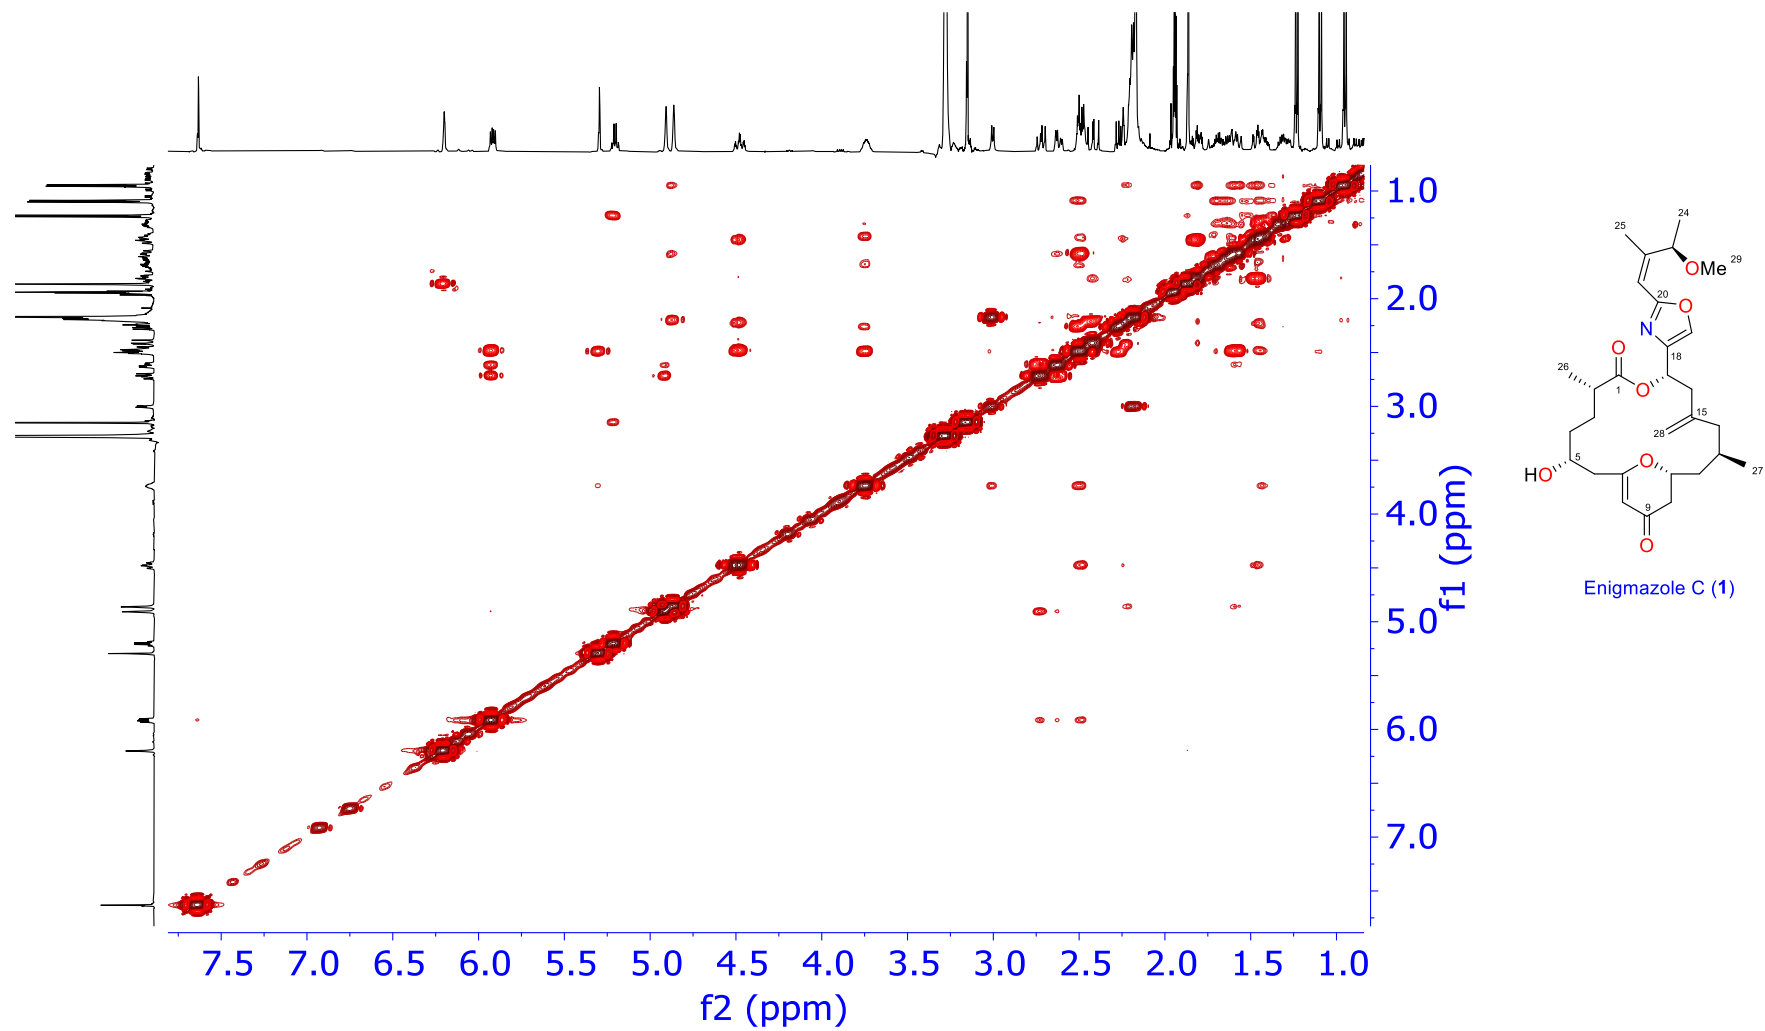

Figure S7.  $^1\text{H}$ - $^1\text{H}$  ROESY spectrum (500 MHz,  $\text{CD}_3\text{CN}$ ) of enigmazole C (1).

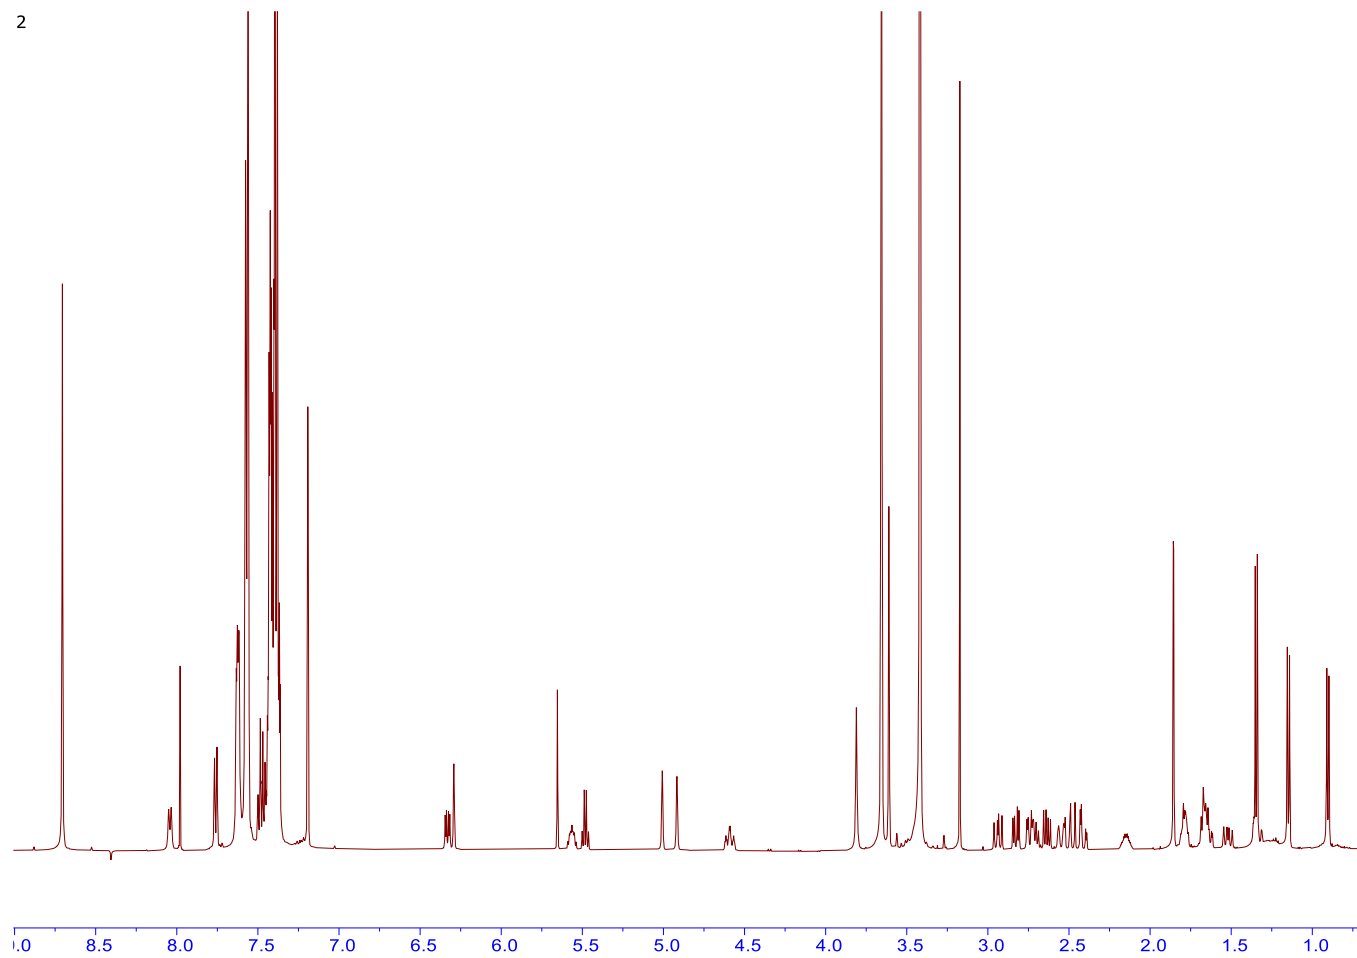

**Figure S8.**  $^1\text{H}$ -NMR spectrum (500 MHz,  $\text{C}_5\text{D}_5\text{N}$ ) of enigmazole C-R-MPTA (**1-R**).

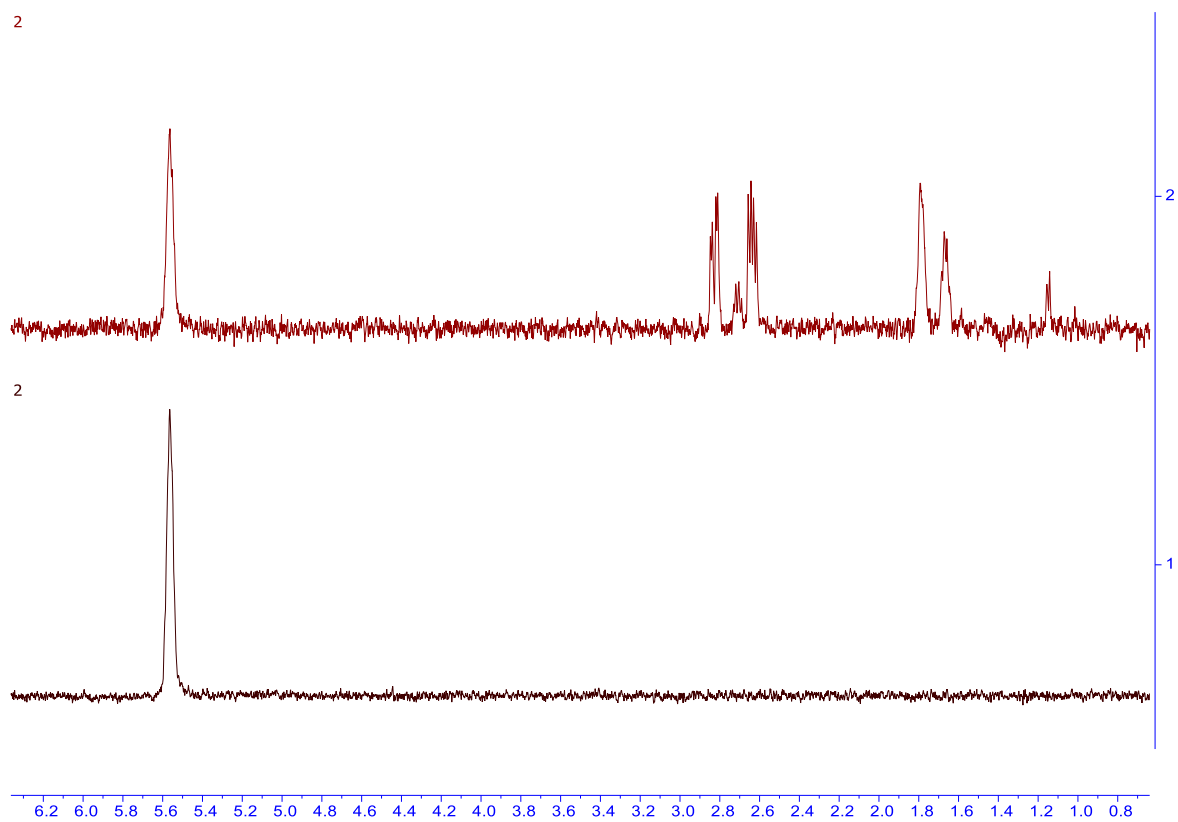

**Figure S9.** Selective 1D-TOCSY (500 MHz,  $C_5D_5N$ ) of H5 in enigmazole C-R-MTPA (**1-R**)

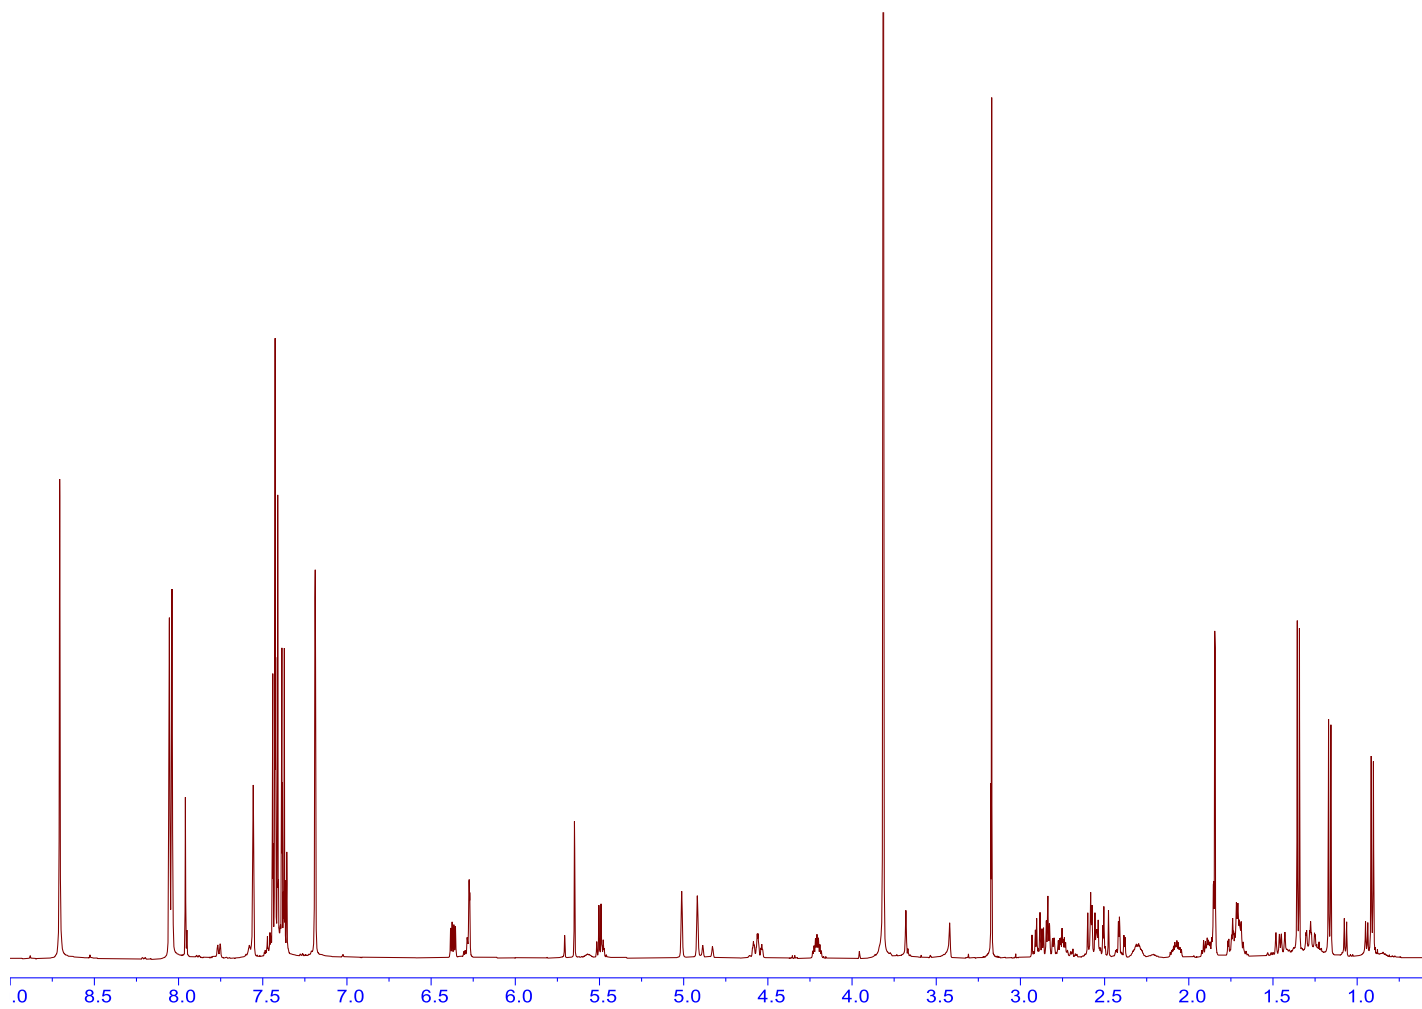

**Figure S10.**  $^1\text{H}$  NMR spectrum (500 MHz,  $\text{C}_5\text{D}_5\text{N}$ ) of enigmazole C-S-MPTA (**1-S**).

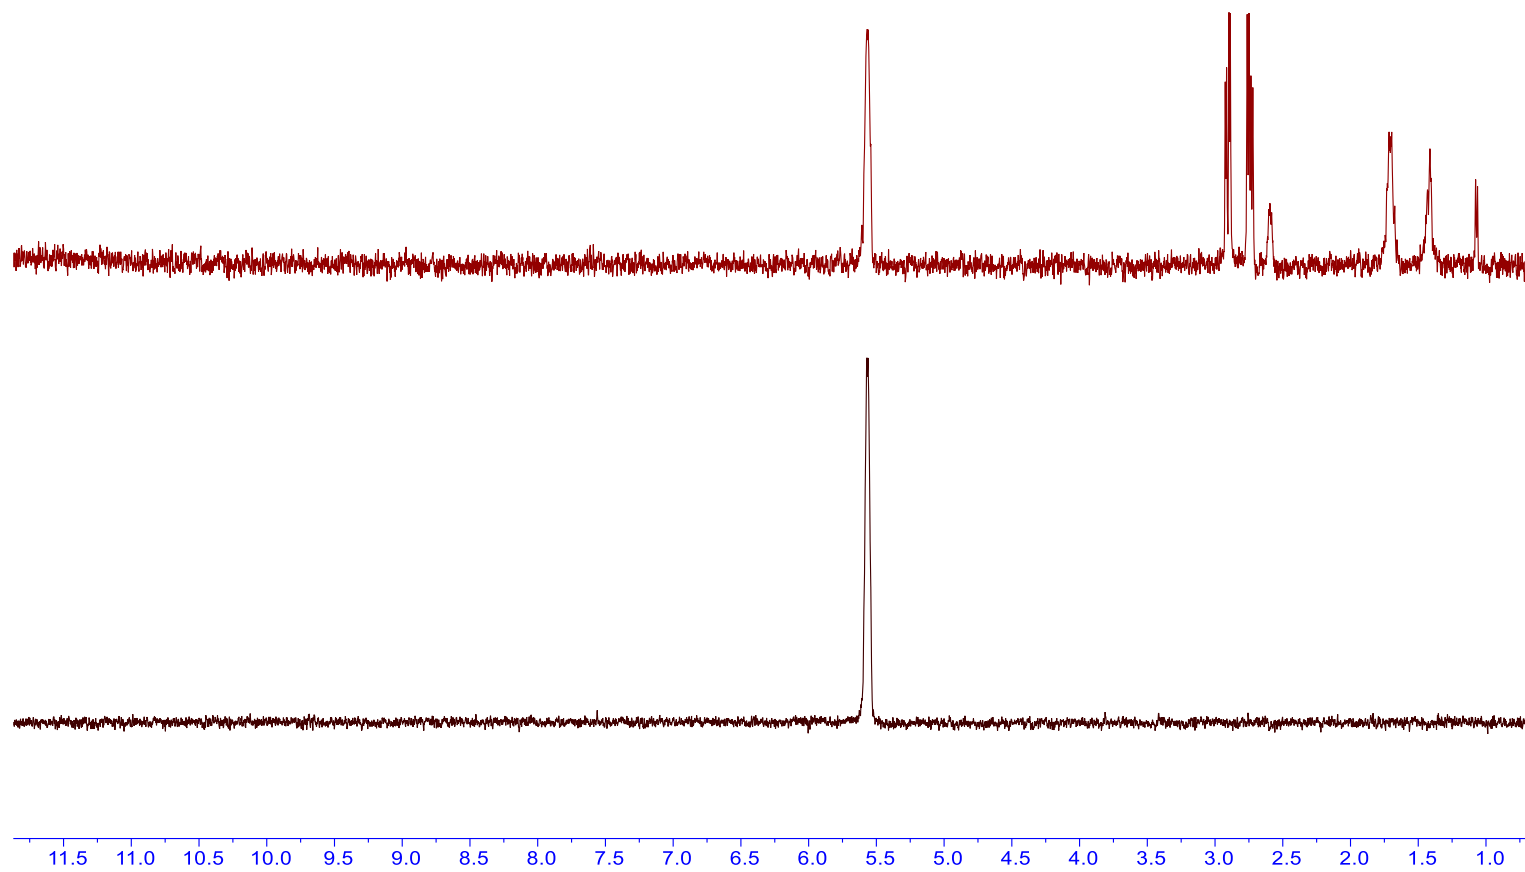

**Figure S11.** Selective 1D-TOCSY (500 MHz, C<sub>5</sub>D<sub>5</sub>N) of H5 in enigmazole C-S-MTPA (**1-S**)

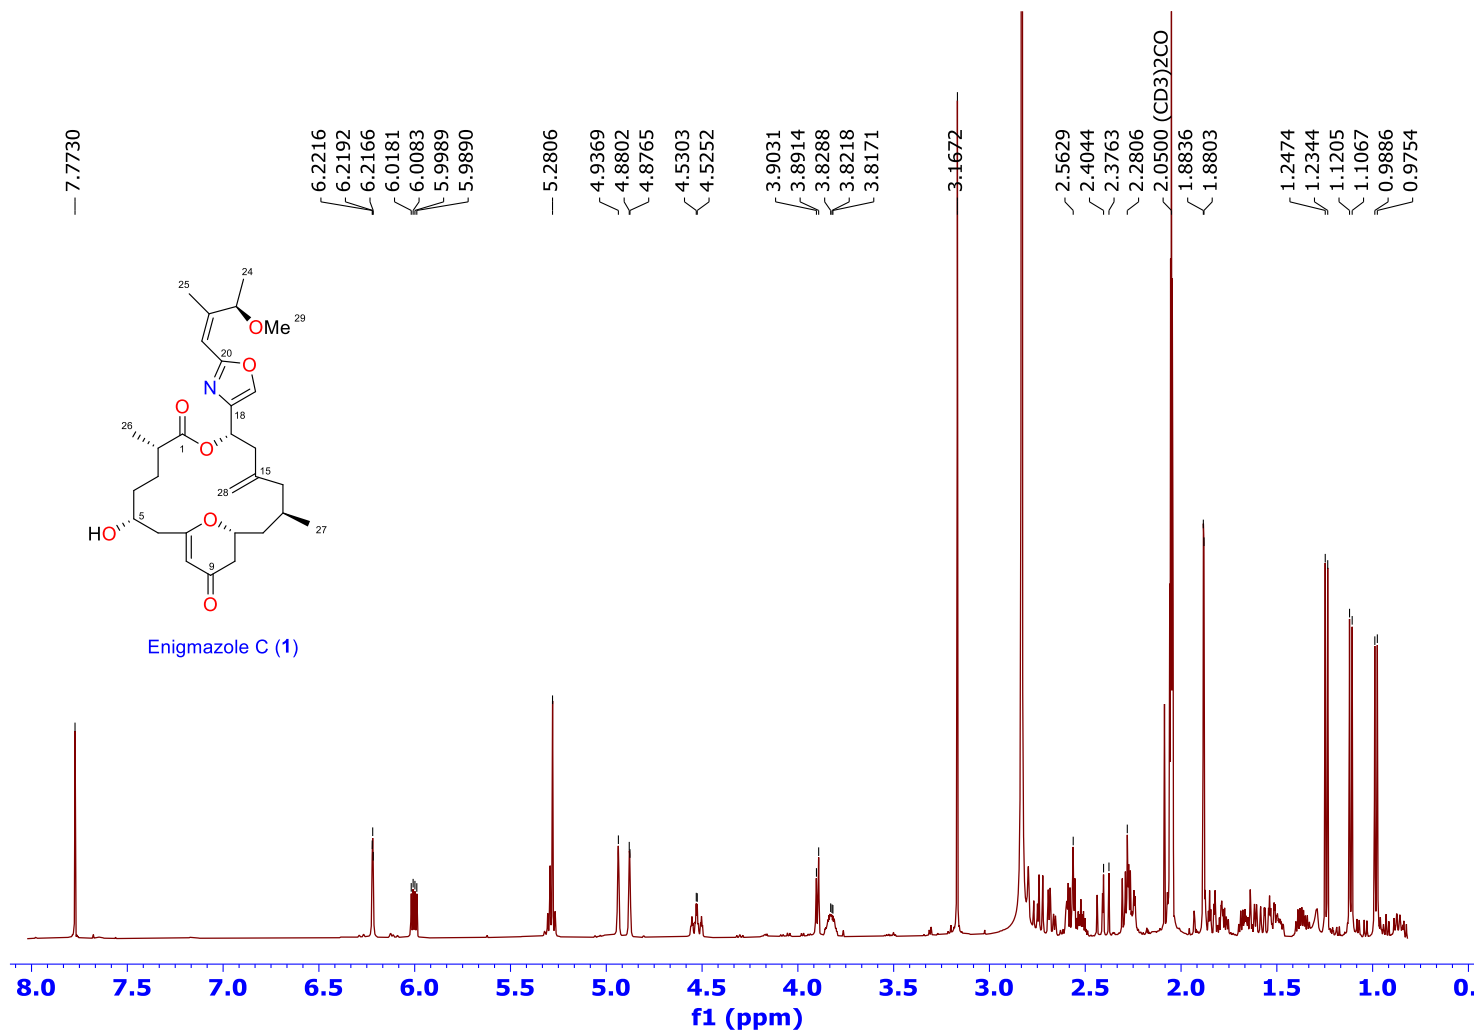

**Figure S12.**  $^1\text{H}$  NMR spectrum (500 MHz, acetone- $d_6$ ) of enigmazole C (1).

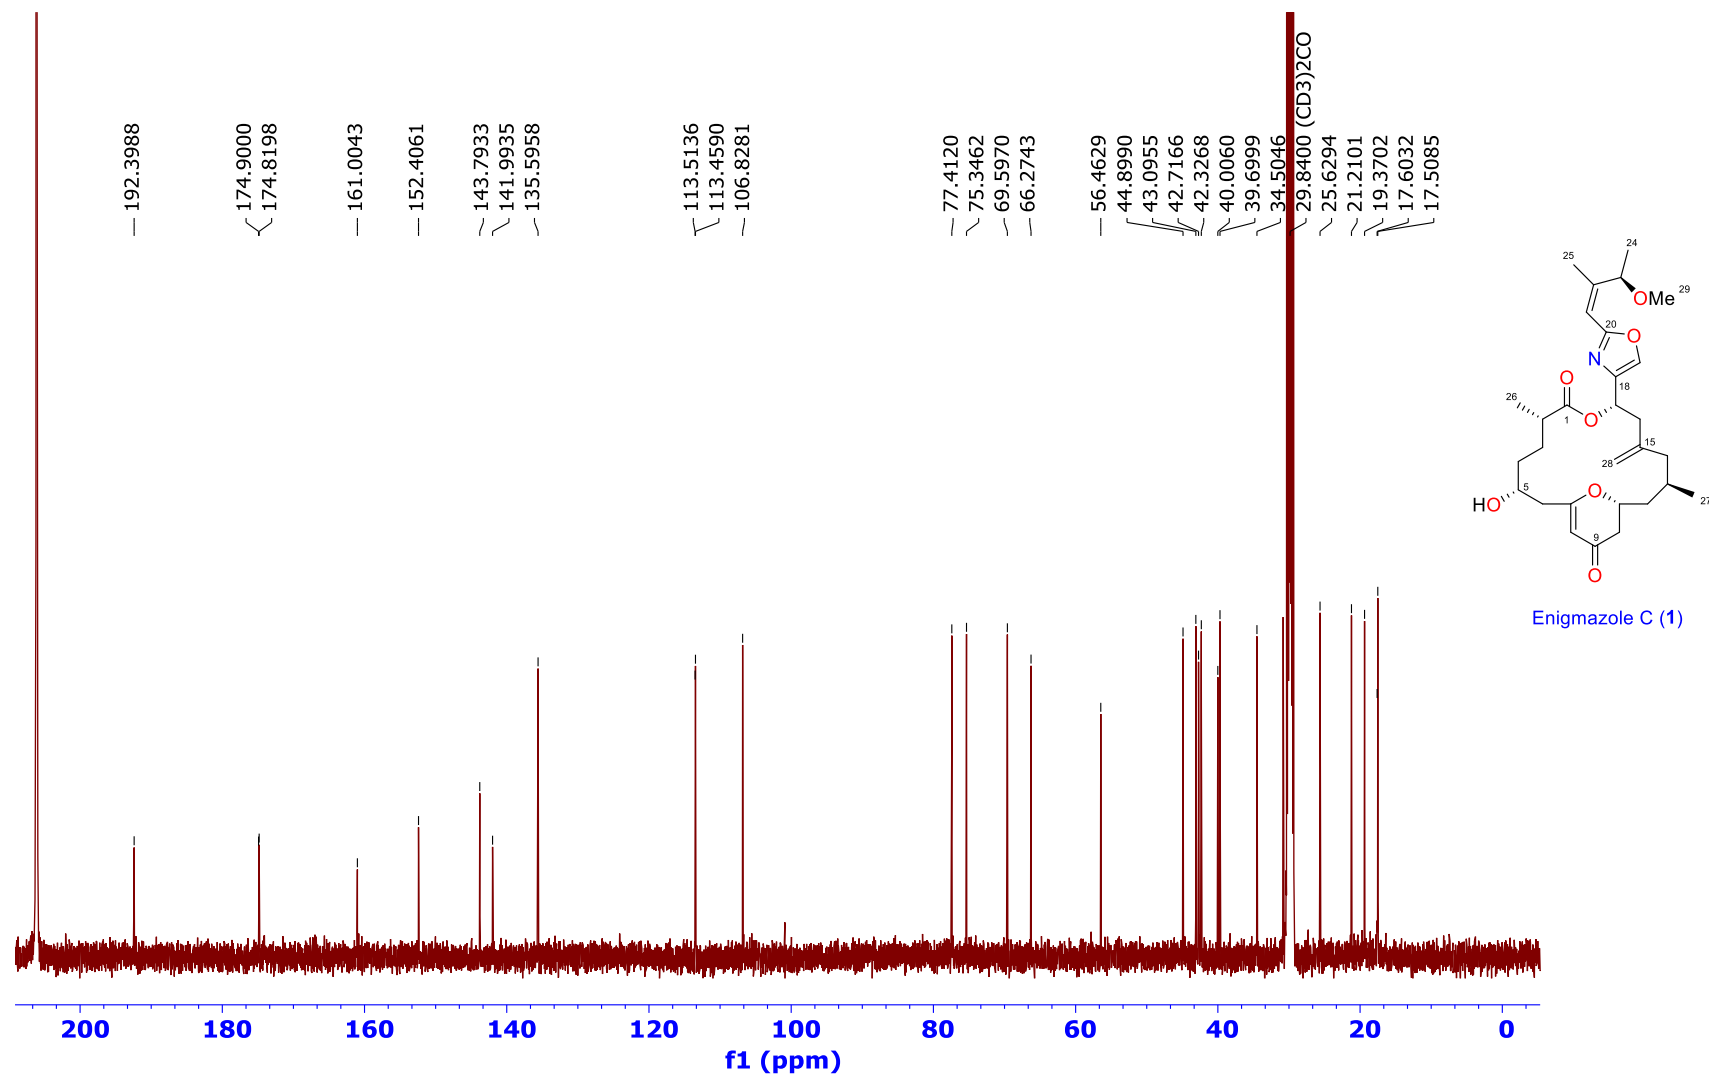

Figure S13. <sup>13</sup>C NMR spectrum (125 MHz, acetone-d<sub>6</sub>) of enigmazole C (1).



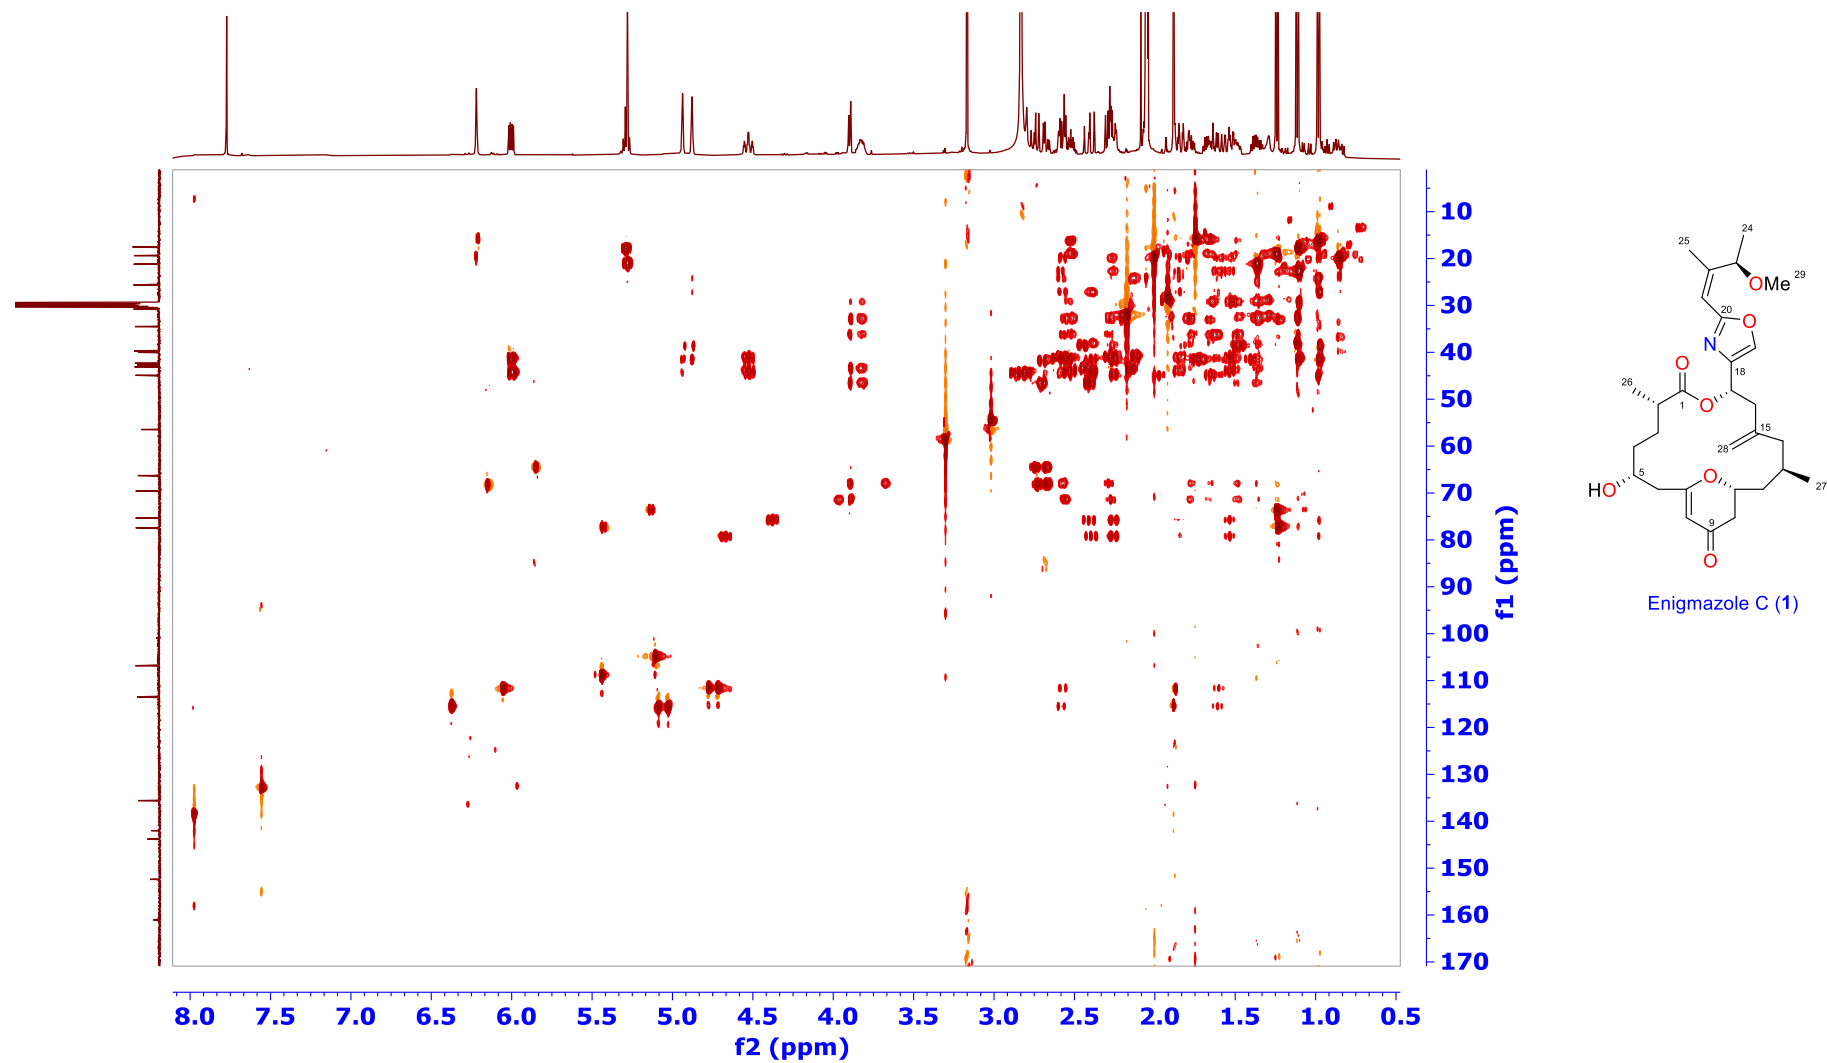

Figure S14. HSQC-HECADE spectrum (500 MHz, acetone-d<sub>6</sub>) of enigmazole C (**1**).

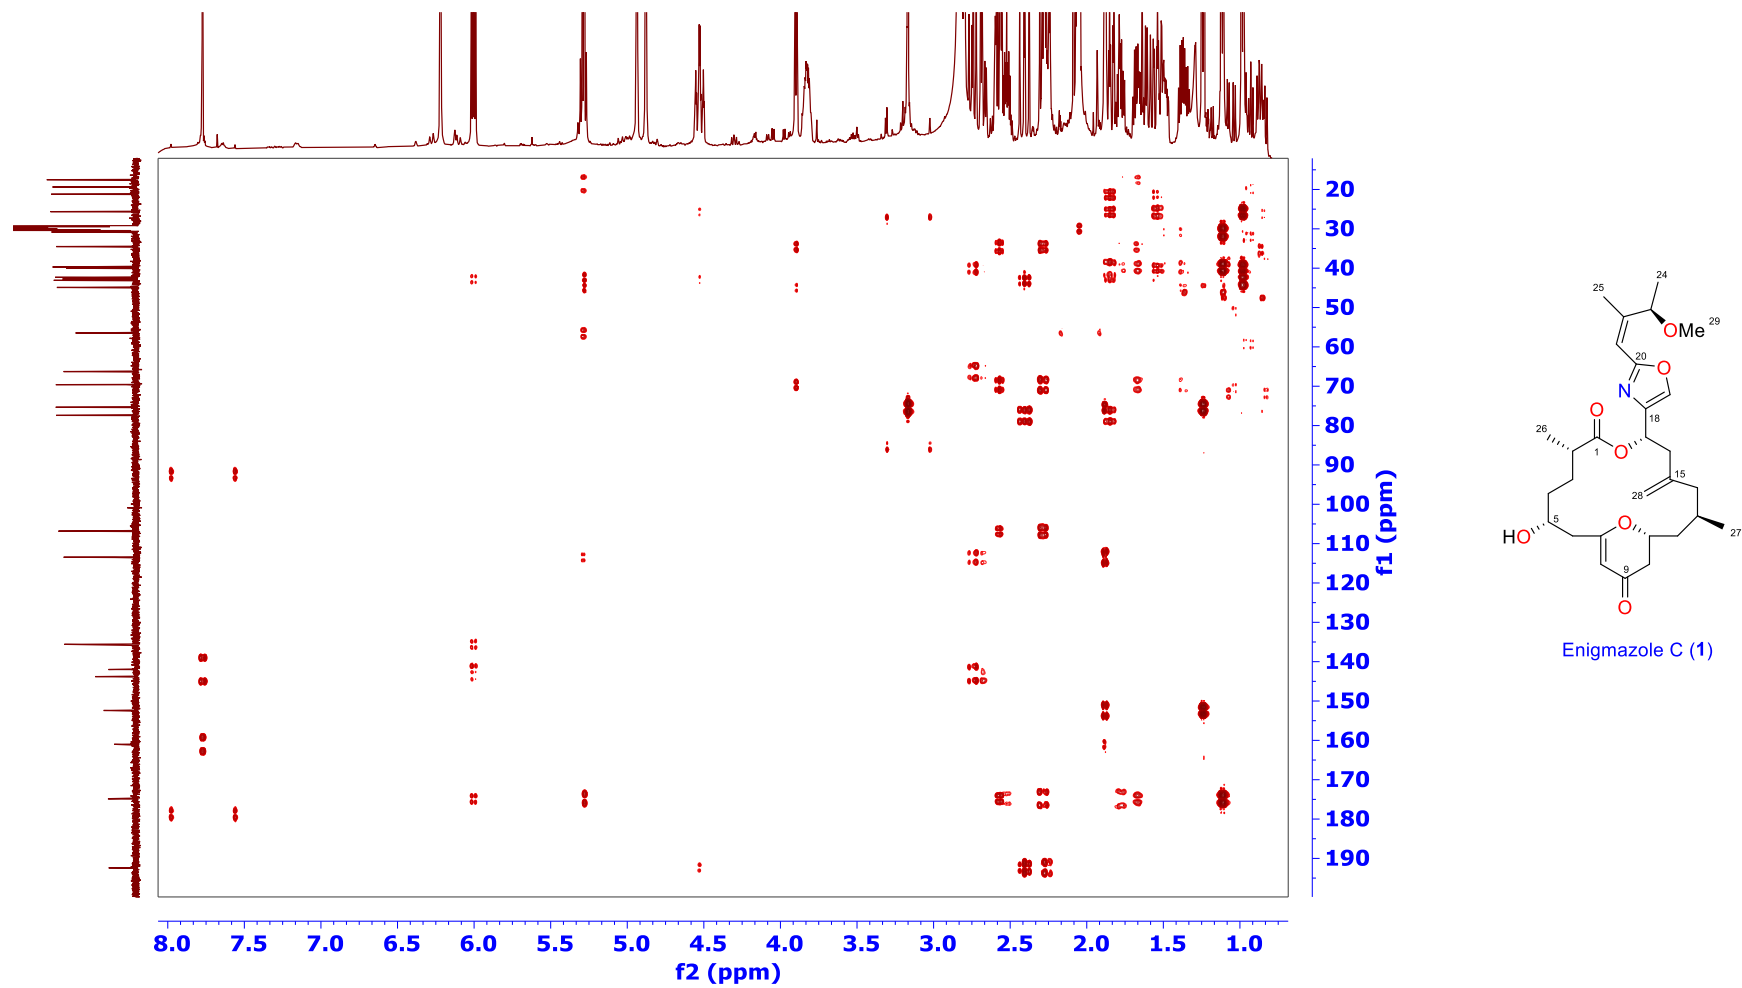

Figure S15. J-HMBC spectrum (500 MHz, acetone-d<sub>6</sub>) of enigmazole C (1) (J-scale =53)

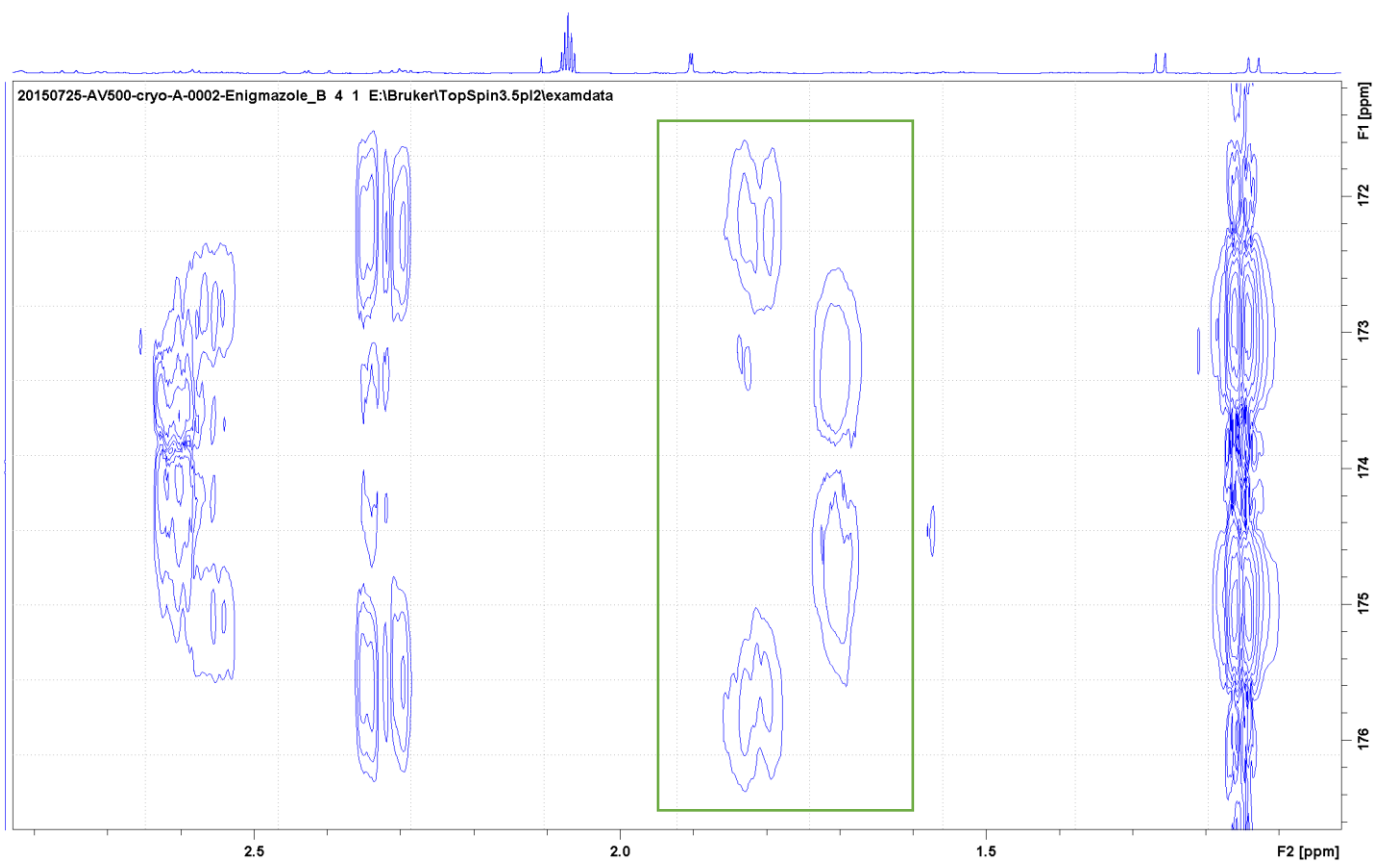

J-scale=53

${}^3J_{C1H3l} = 444 / 53 = 8.4 \text{ Hz}$

${}^3J_{C1H3h} = 188 / 53 = 3.5 \text{ Hz}$

Figure S16. J-HMBC spectrum expansion (500 MHz, acetone- $d_6$ ) of enigmazole C (**1**) (J-scale =55)

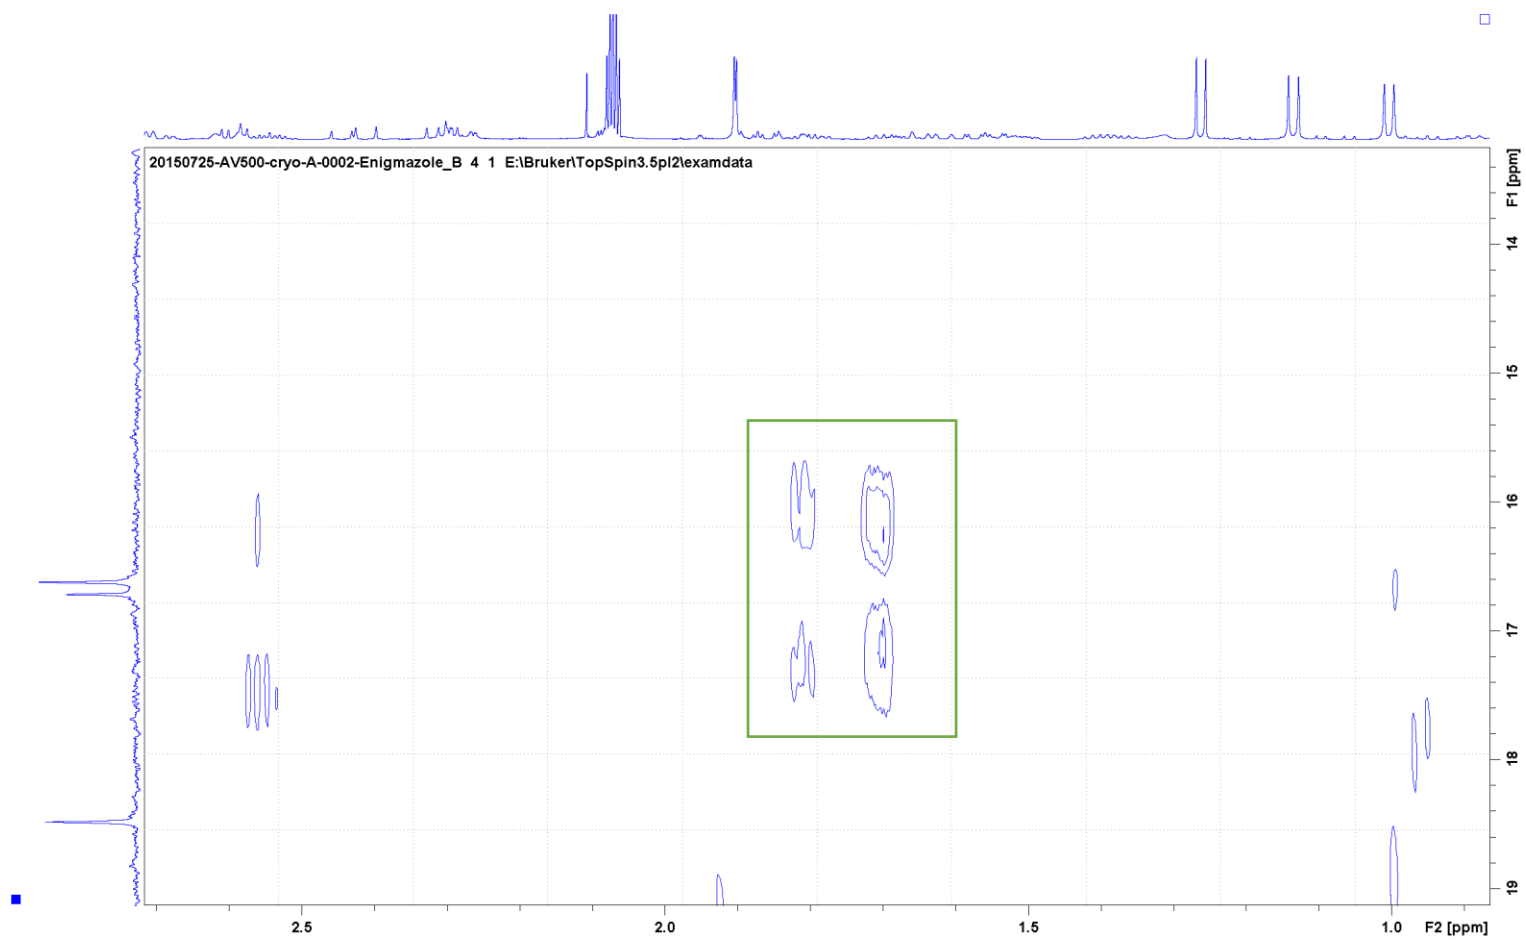

$${}^3J_{C_{26}H_{3l}} = 156/53 = 2.5 \text{ Hz}$$

$${}^3J_{C_{26}H_{3h}} = 126/53 = 2.4 \text{ Hz}$$

**Figure S17.** J-HMBC spectrum expansion (500 MHz, acetone- $d_6$ ) of enigmazole C (**1**) (J-scale =55)

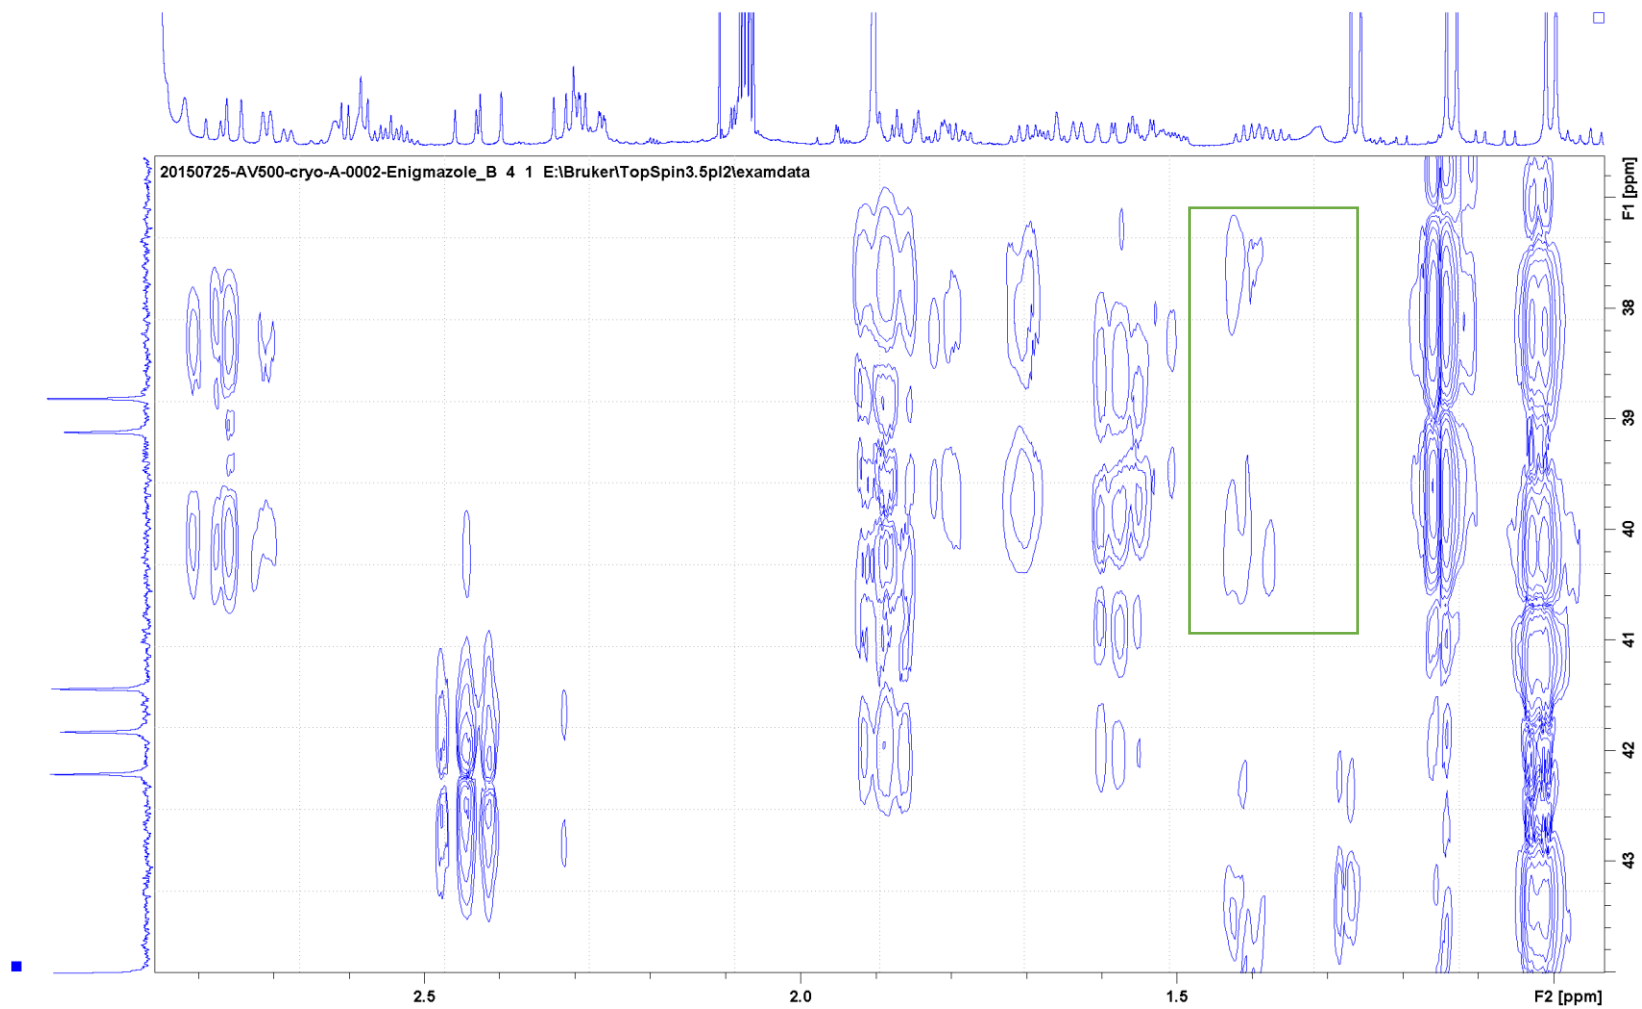

$${}^3J_{\text{C}2\text{H}4\text{l}} = 146/53 = 2.7 \text{ Hz}$$

$${}^3J_{\text{C}2\text{H}4\text{h}} = 370/53 = 7.0 \text{ Hz}$$

Figure S18. J-HMBC spectrum expansion (500 MHz, acetone- $d_6$ ) of enigmazole C (**1**) (J-scale =55)

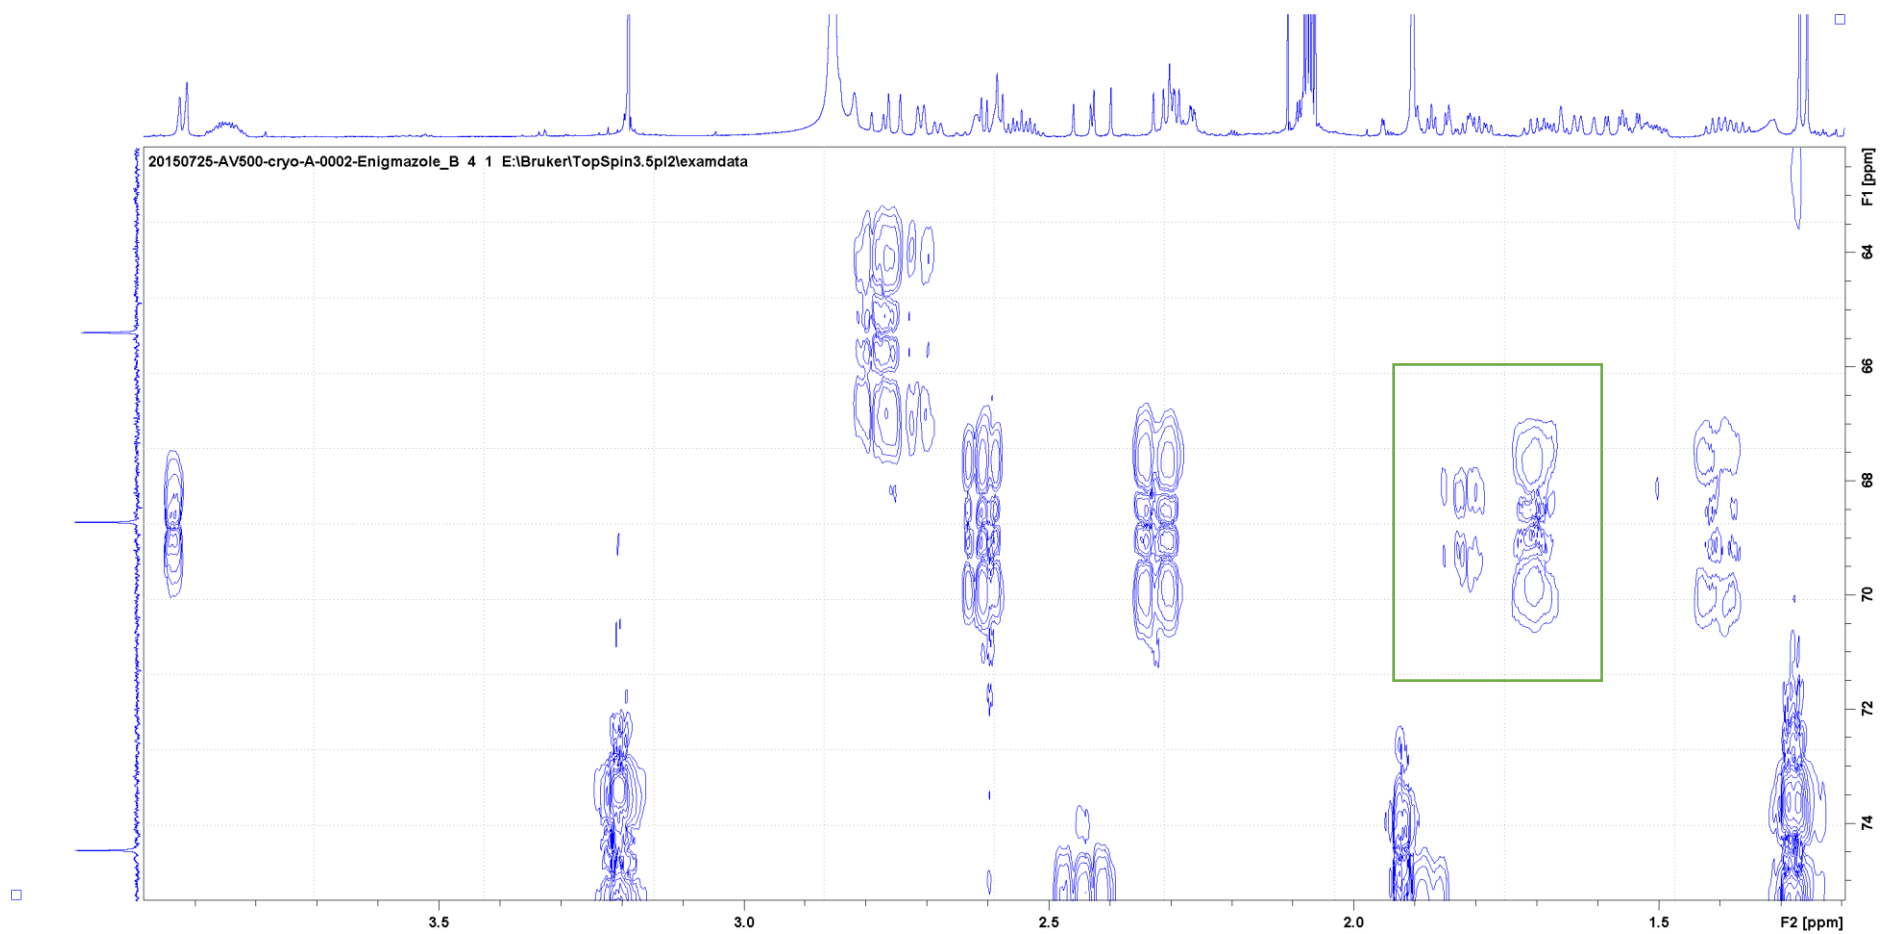

$${}^3J_{\text{C}^{\text{SH}3\text{l}}}=127/53 = 2.4 \text{ Hz}$$

$${}^3J_{\text{C}^{\text{SH}3\text{h}}}=318/53= 6.0 \text{ Hz}$$

Figure S19. J-HMBC spectrum expansion (500 MHz, acetone-d<sub>6</sub>) of enigmazole C (1) (J-scale =55)

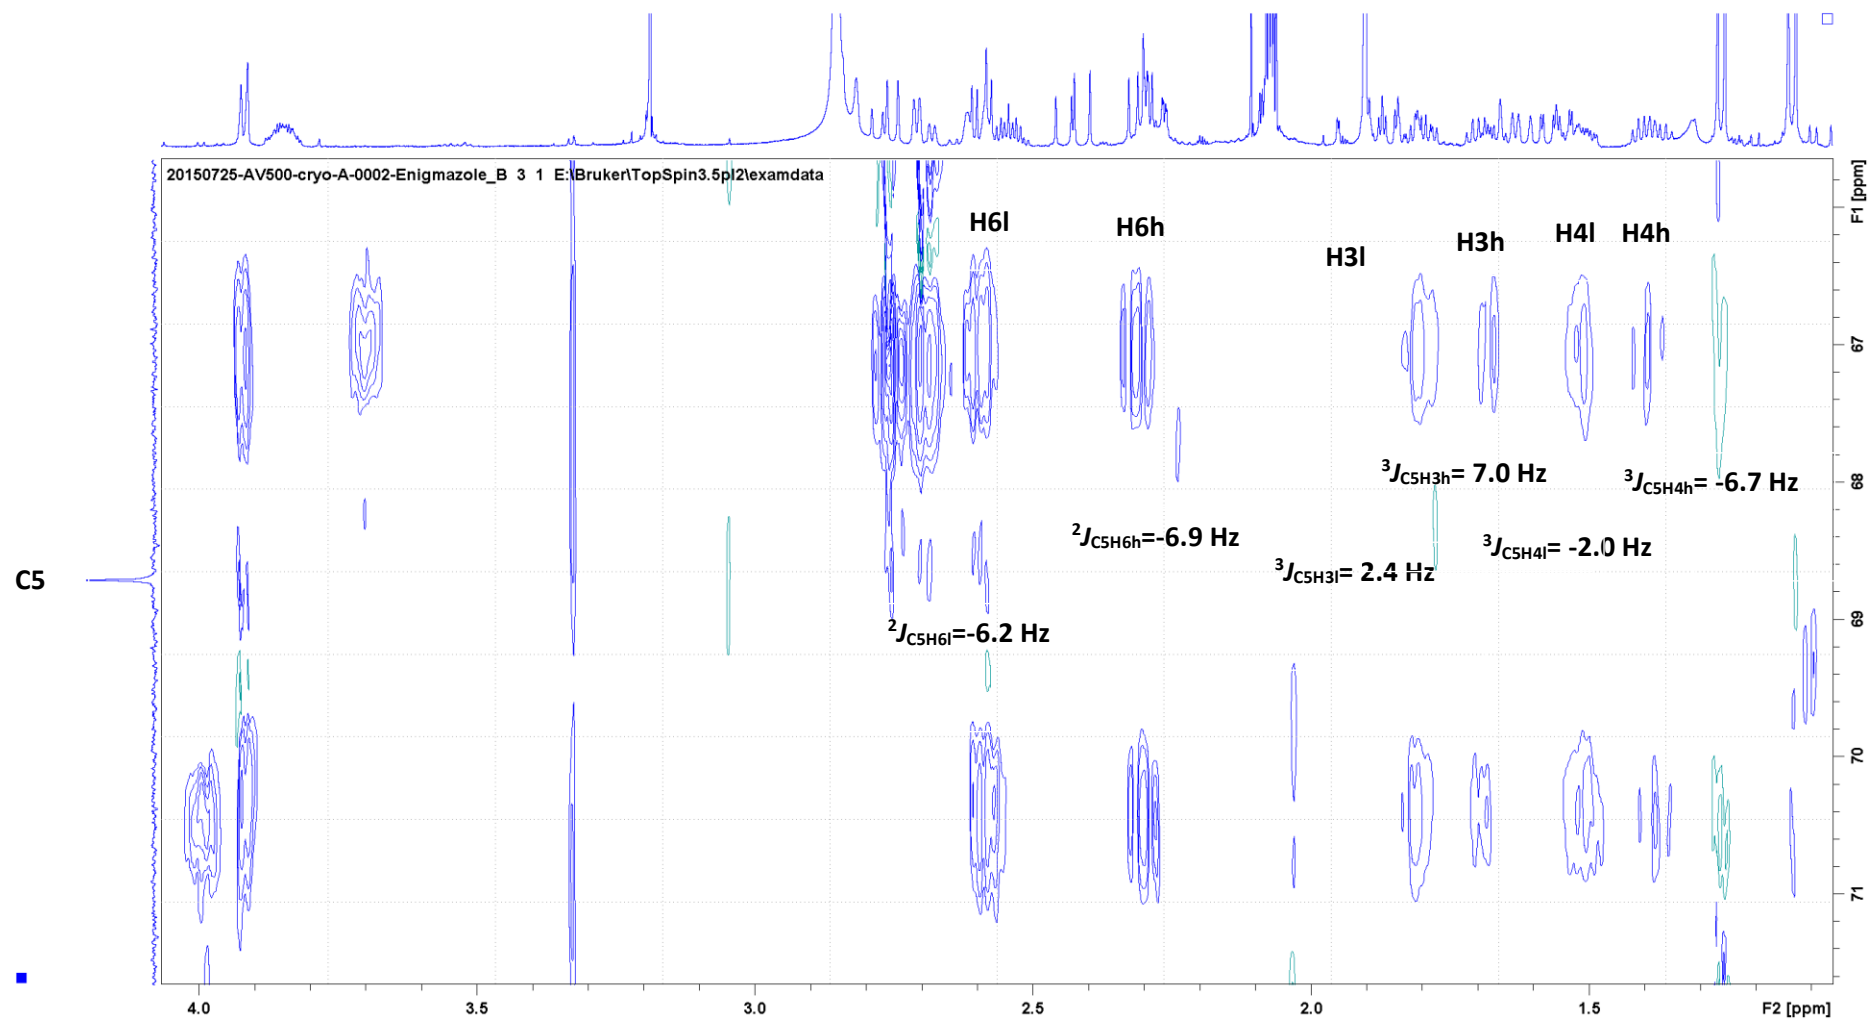

Figure S20. HSQC-HECADE spectrum expansion (500 MHz, acetone-d<sub>6</sub>) of enigmazole C (1)

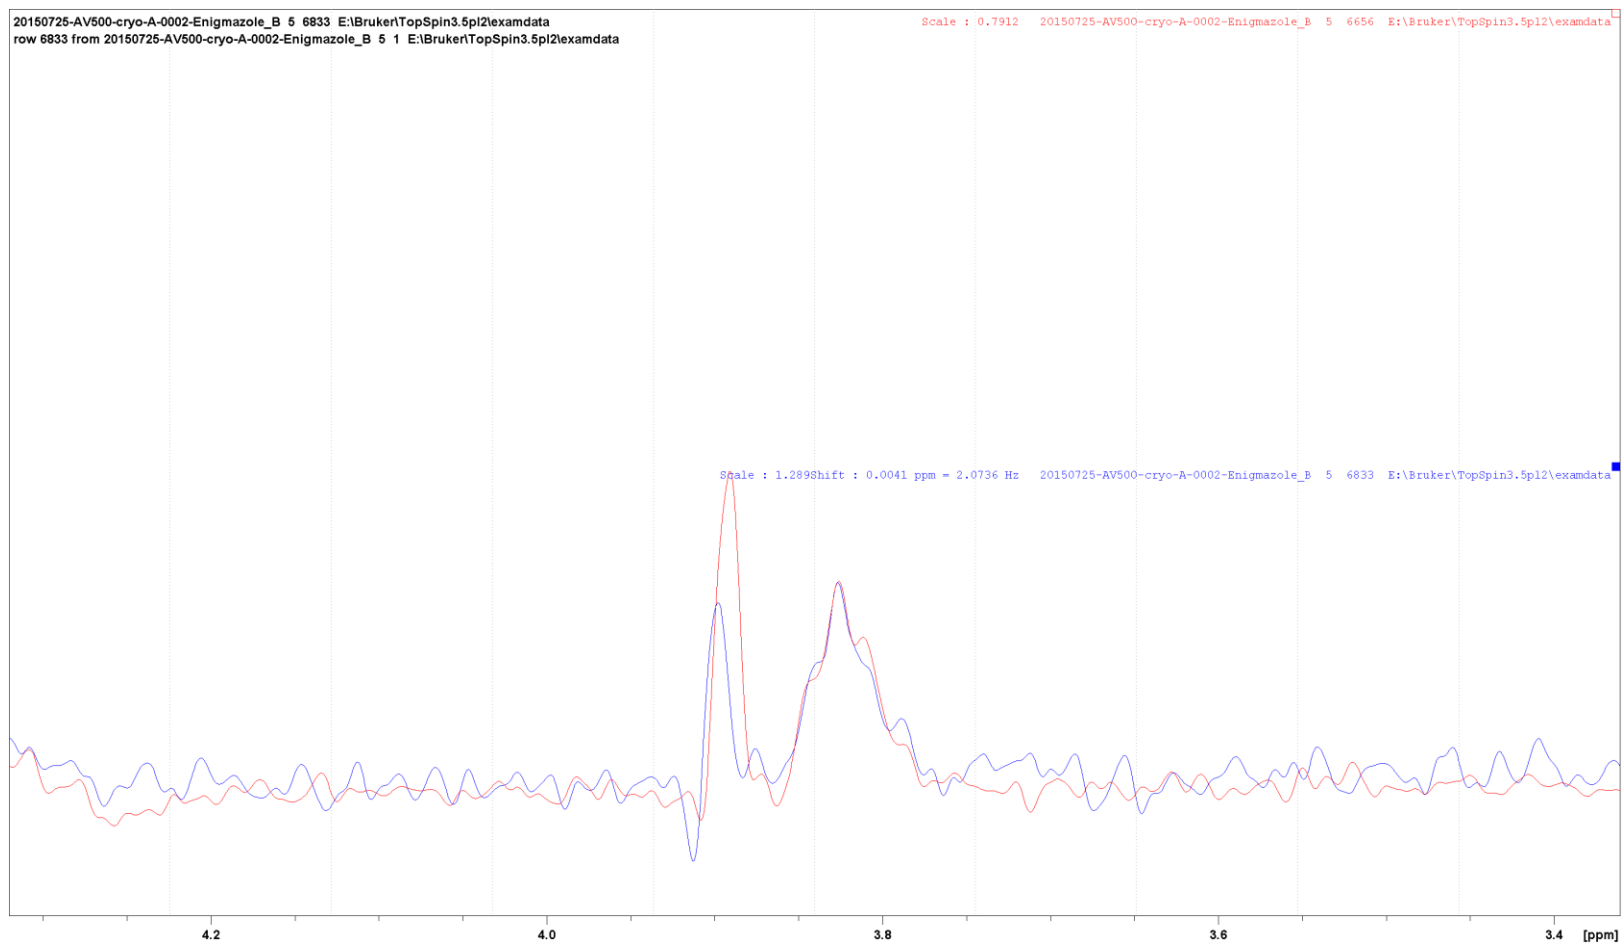

$^3J_{C3H5}=2.1$  Hz

**Figure S21.** HSQC-HECADE C3alpha and C3beta projections from the HSQC-HECADE (500 MHz, acetone-d<sub>6</sub>) of enigmazole C (**1**)



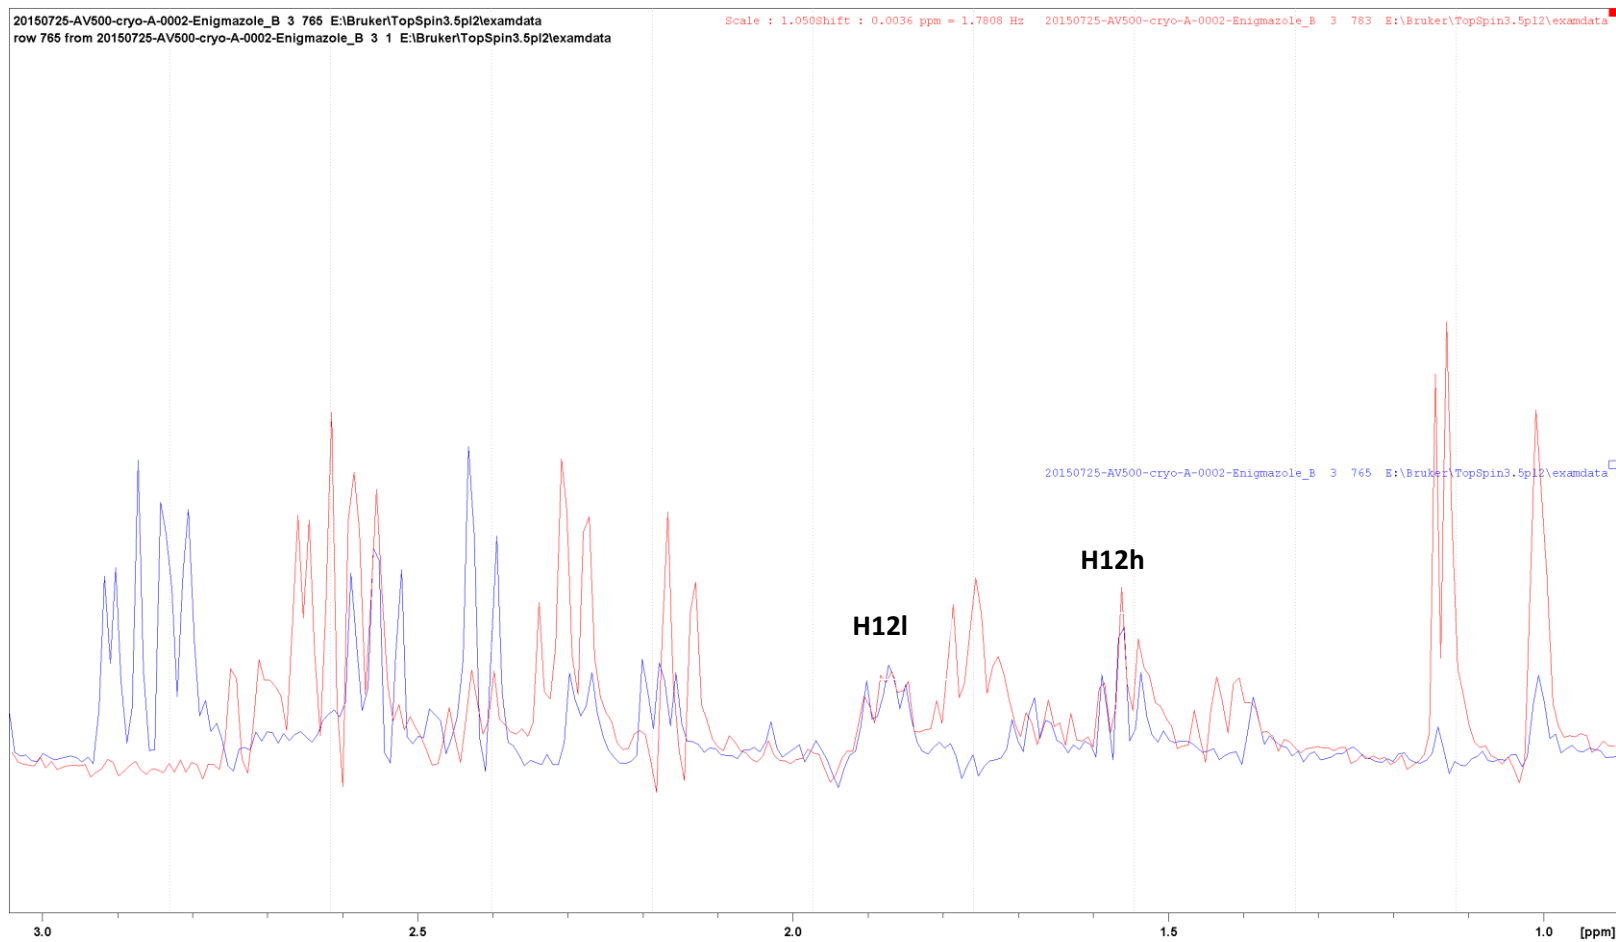

$${}^3J_{C10H12l} = {}^3J_{C10H12h} = 1.7 \text{ Hz}$$

Figure S22. HSQC-HECADE C10alpha and C10beta projections from the HSQC-HECADE (500 MHz, acetone-d<sub>6</sub>) of enigmazole C (1)

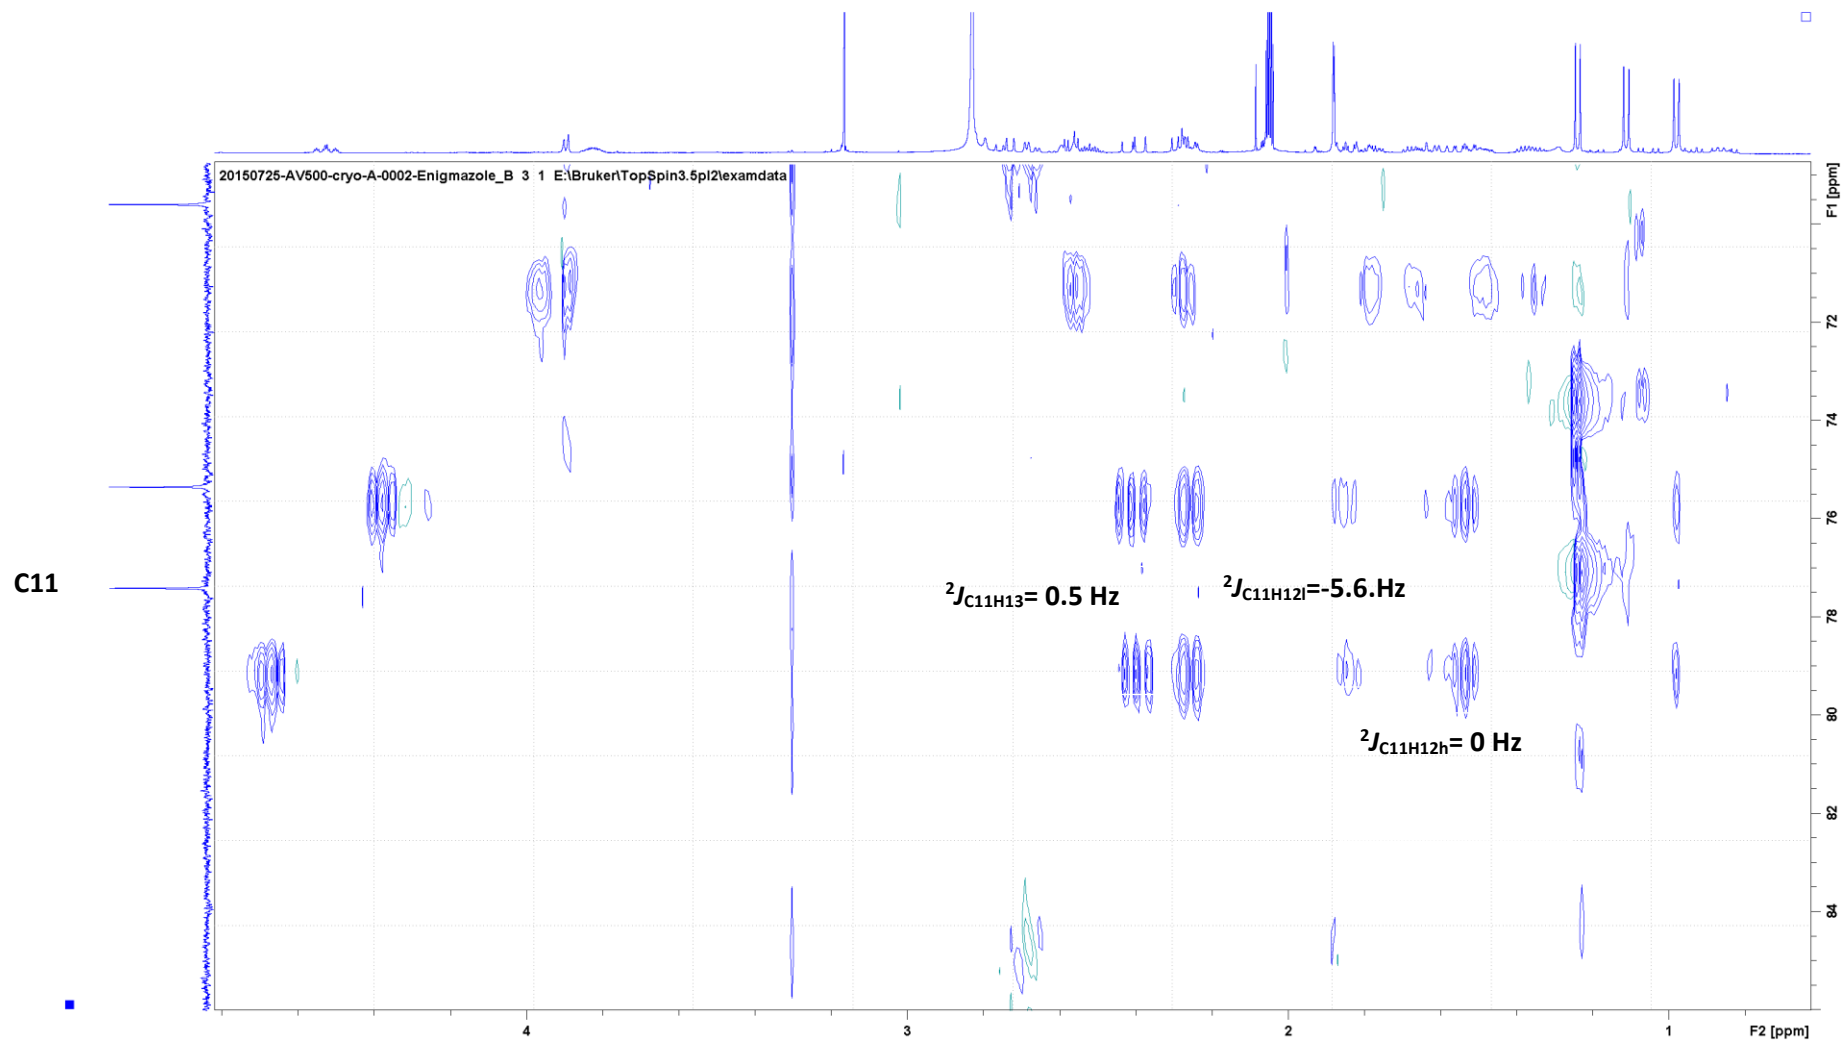

Figure S23. HSQC-HECADE spectrum expansion (500 MHz, acetone- $d_6$ ) of enigmazole C (1)

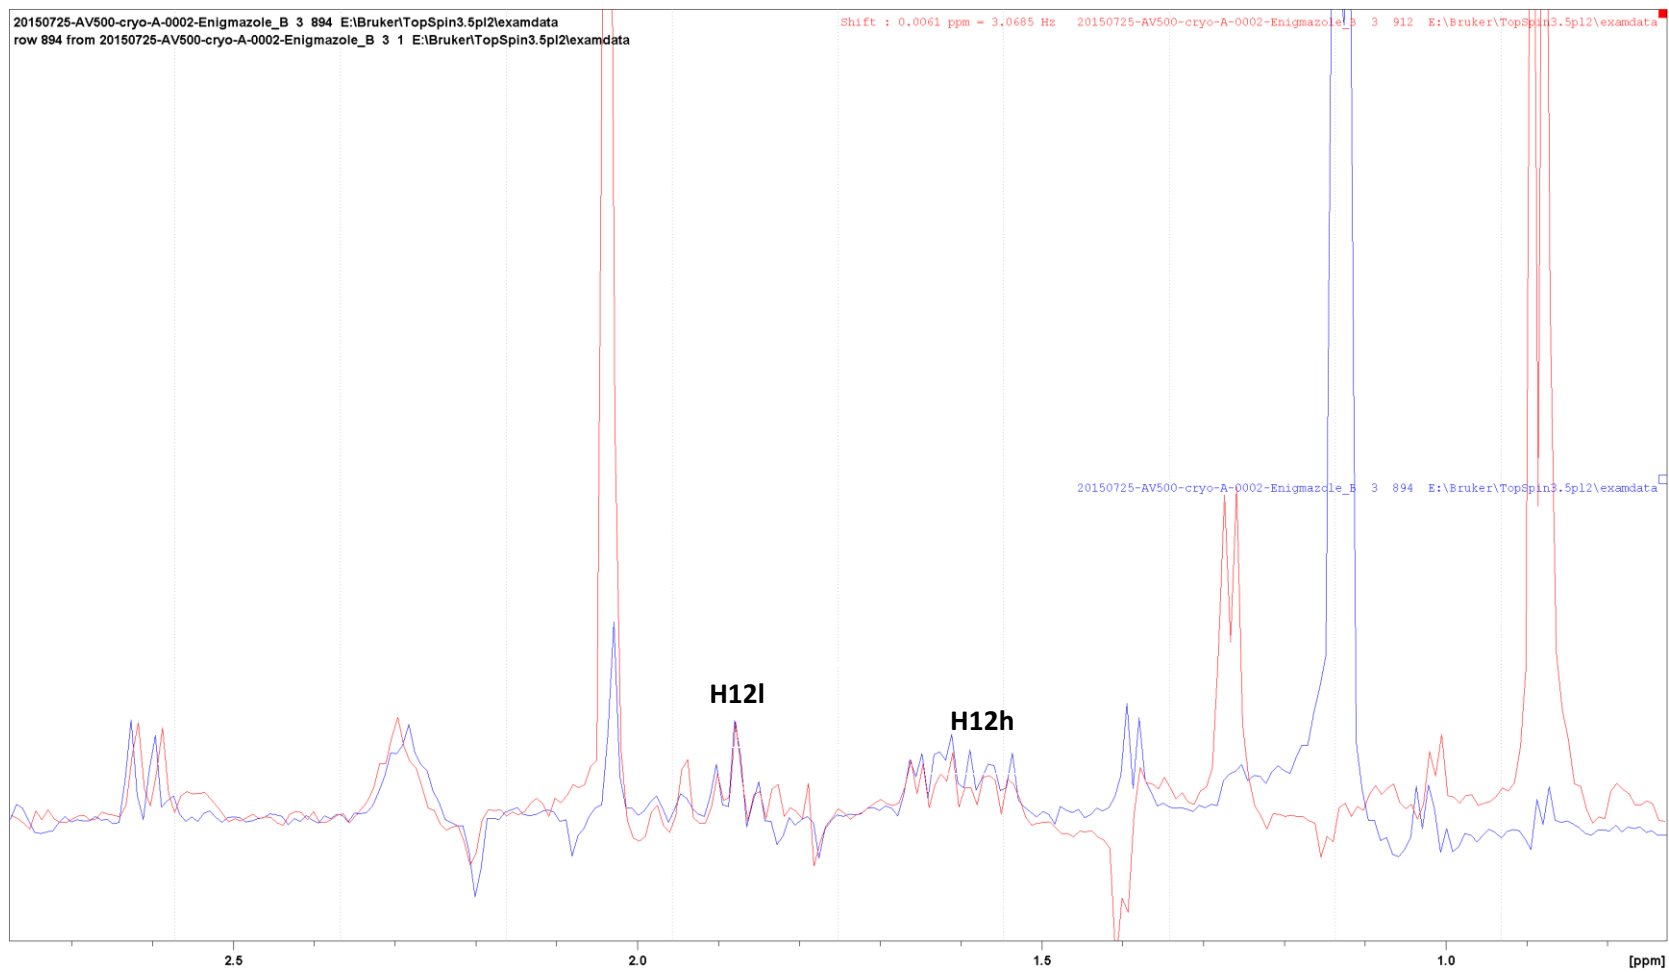

**Figure S24.** HSQC-HECADE C27alpha and C27beta projections from the HSQC-HECADE (500 MHz, acetone-d6) of enigmazole C (1)  $^3J_{C27H12l} = ^3J_{C27H12h} = 3.0$  Hz

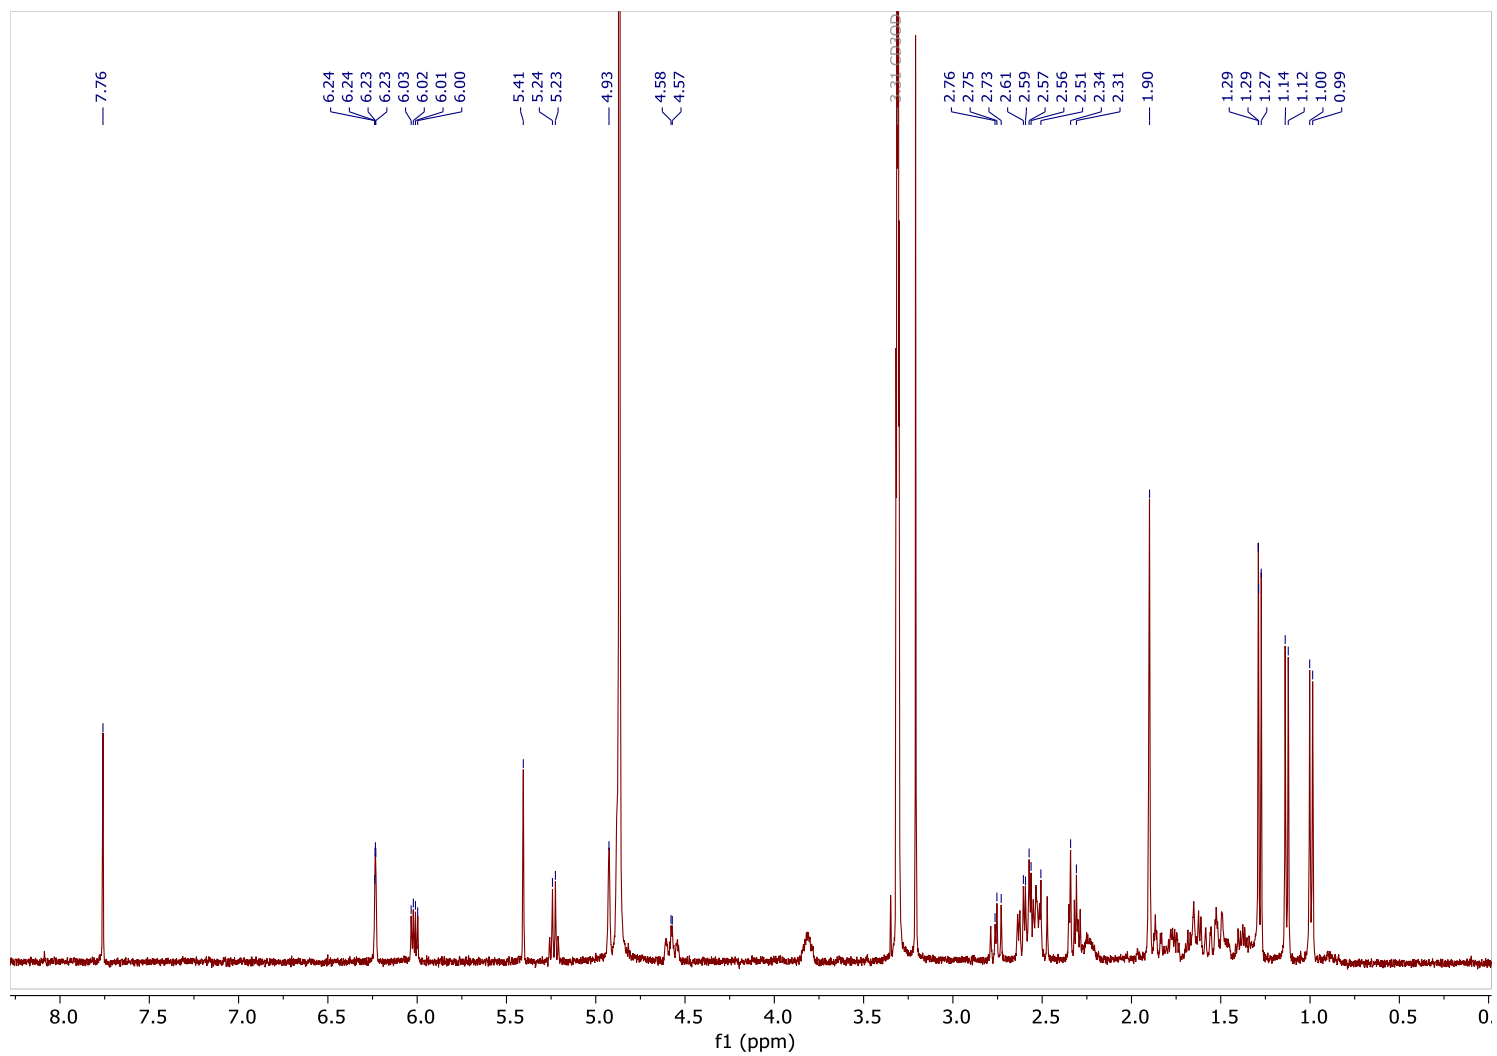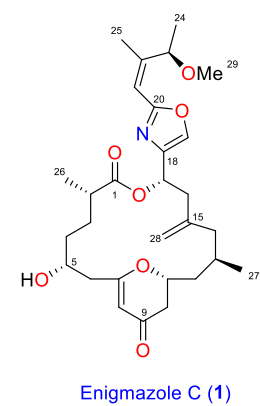

Figure S25.  $^1\text{H}$  NMR spectrum (500 MHz,  $\text{CD}_3\text{OD}$ ) of enigmazole C (**1**).

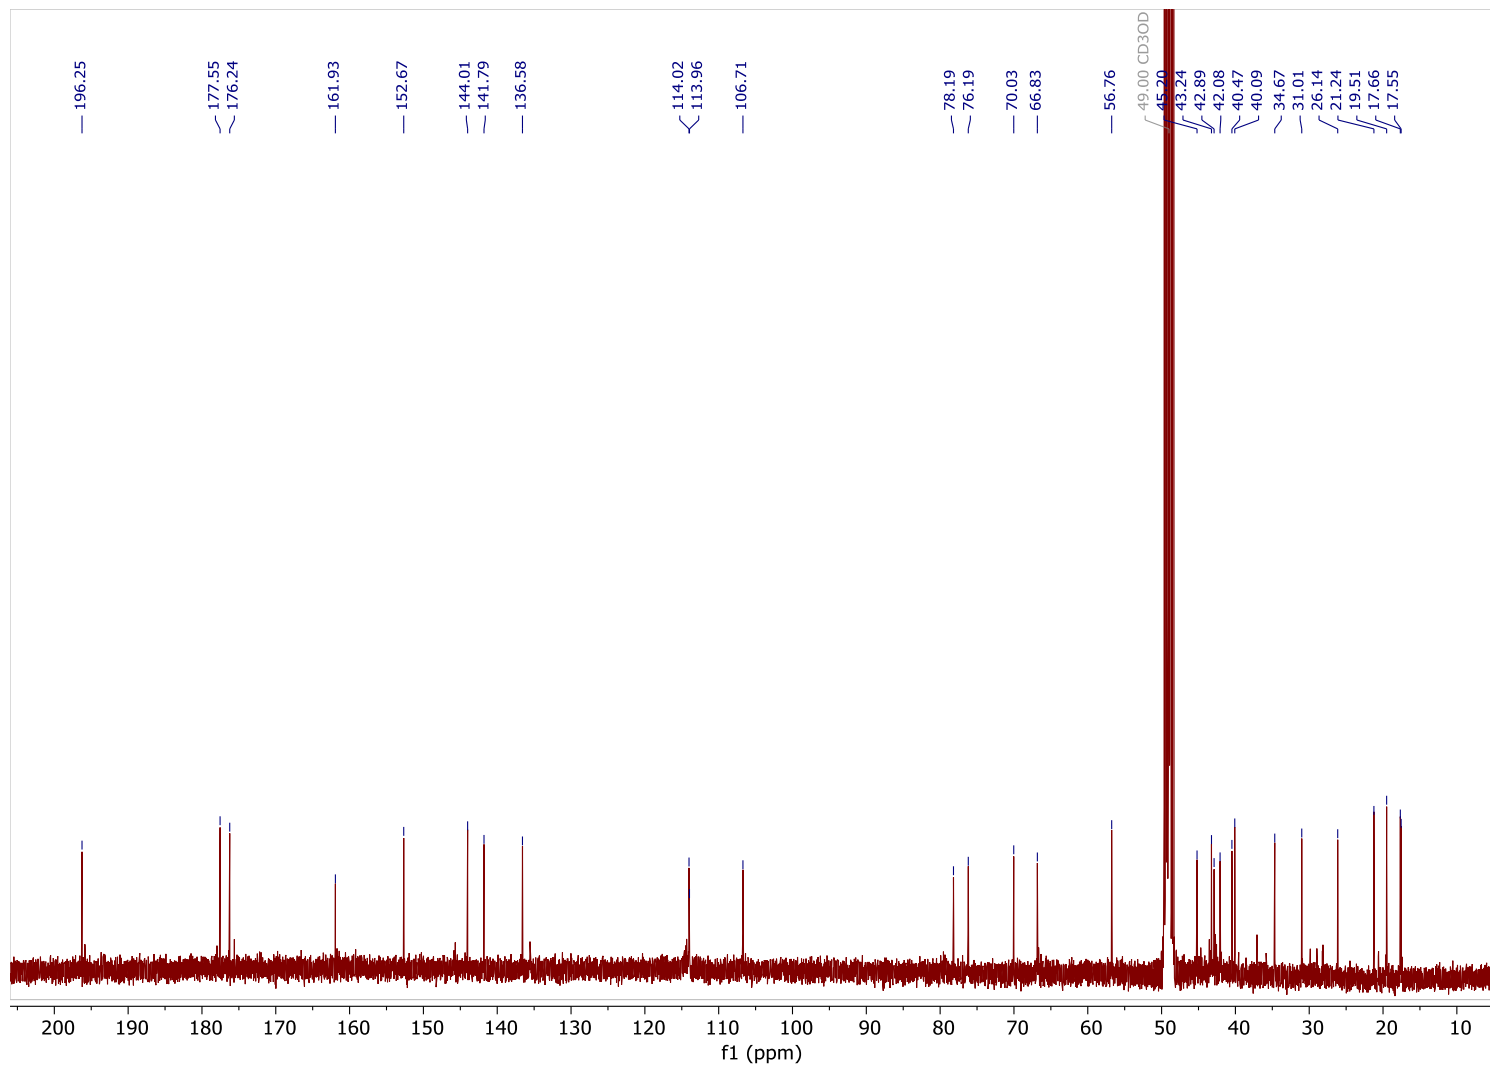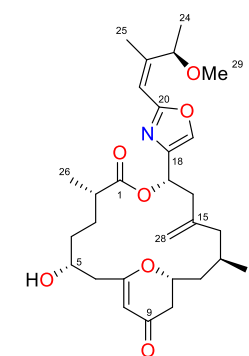

Enigmazole C (1)

Figure S26.  $^{13}\text{C}$  NMR spectrum (125 MHz,  $\text{CD}_3\text{OD}$ ) of enigmazole C (1).

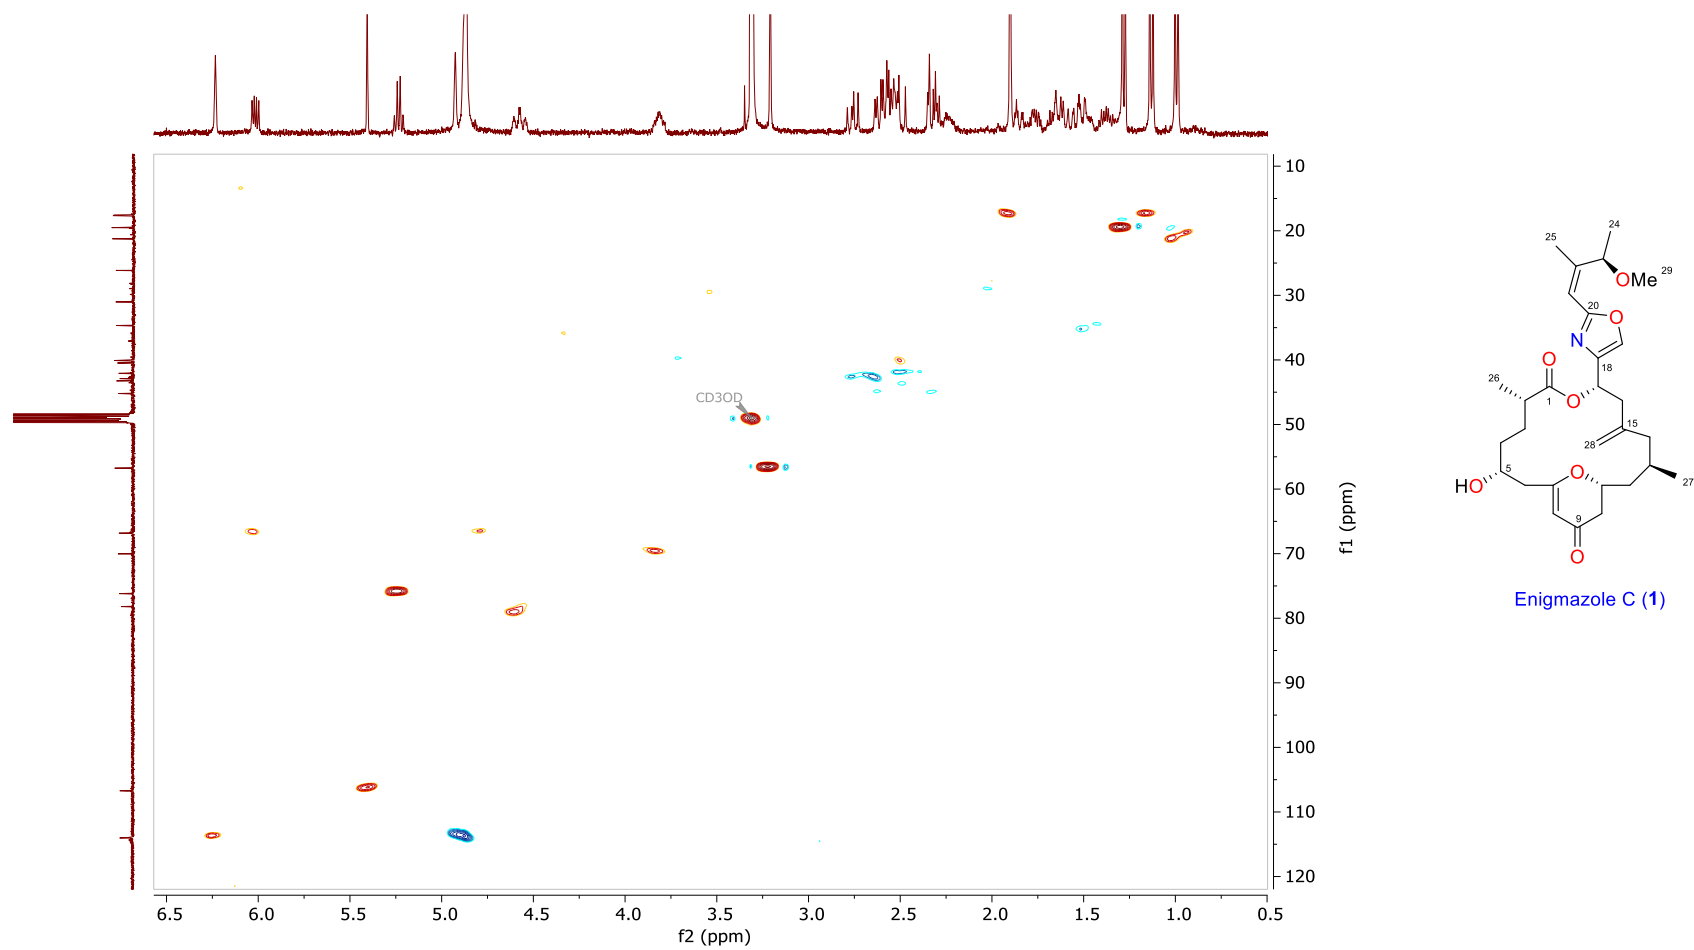

Figure S27.  $^1\text{H}$ - $^{13}\text{C}$  Edited-HSQC spectrum (500 MHz,  $\text{CD}_3\text{OD}$ ) of enigmazole C (1).

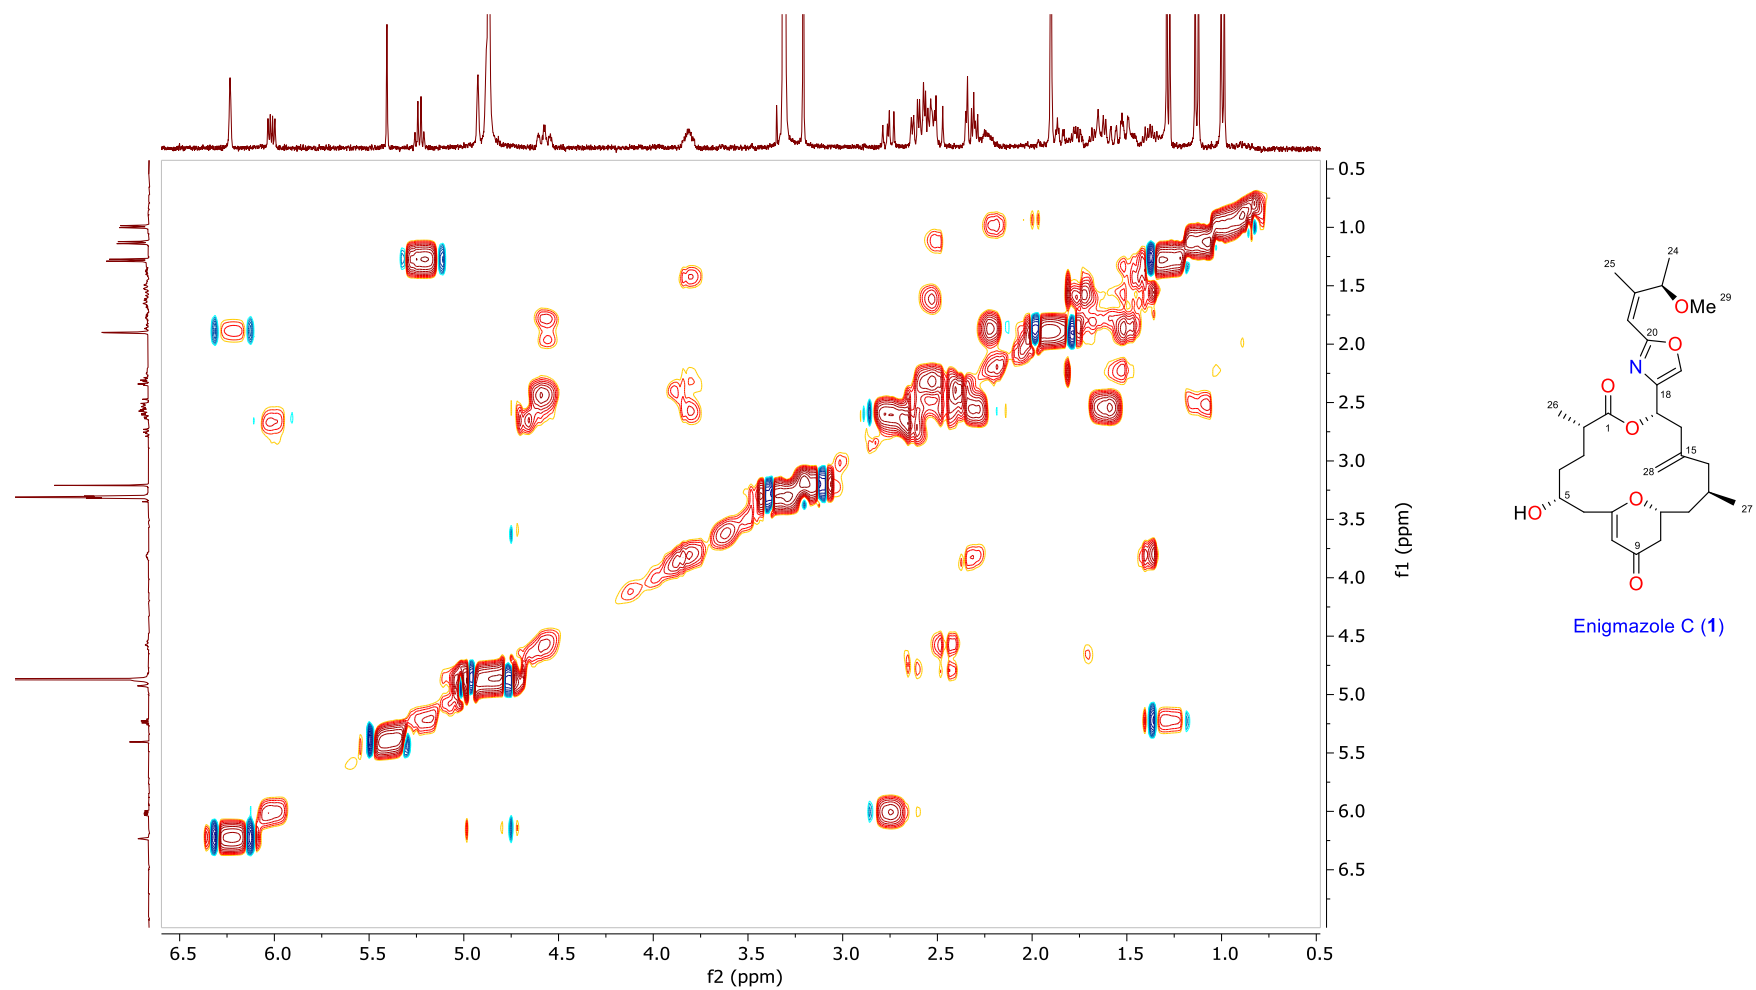

**Figure S28.**  $^1\text{H}$ - $^1\text{H}$  COSY spectrum (500 MHz,  $\text{CD}_3\text{OD}$ ) of enigmazole C (1).

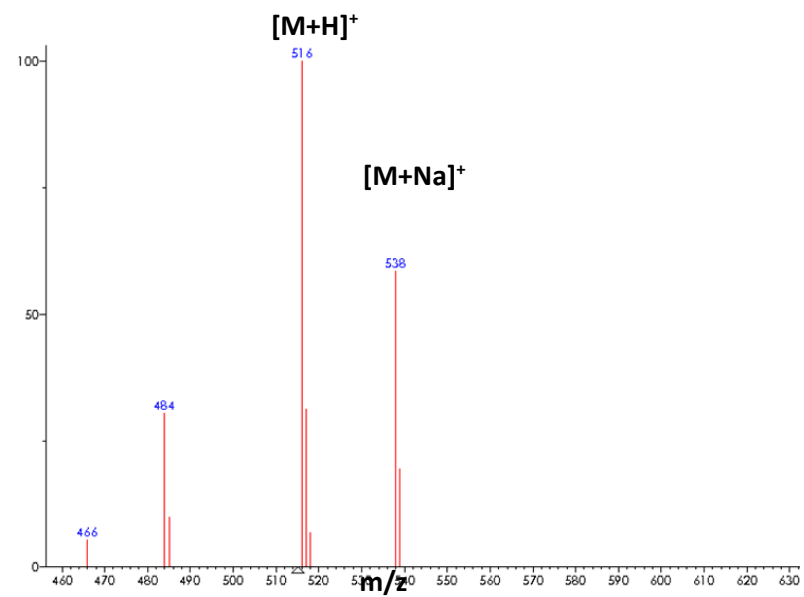

**Figure S29.** LR-ESIMS (+) of enigmazole C (**1**).



Overlaid Spectra:

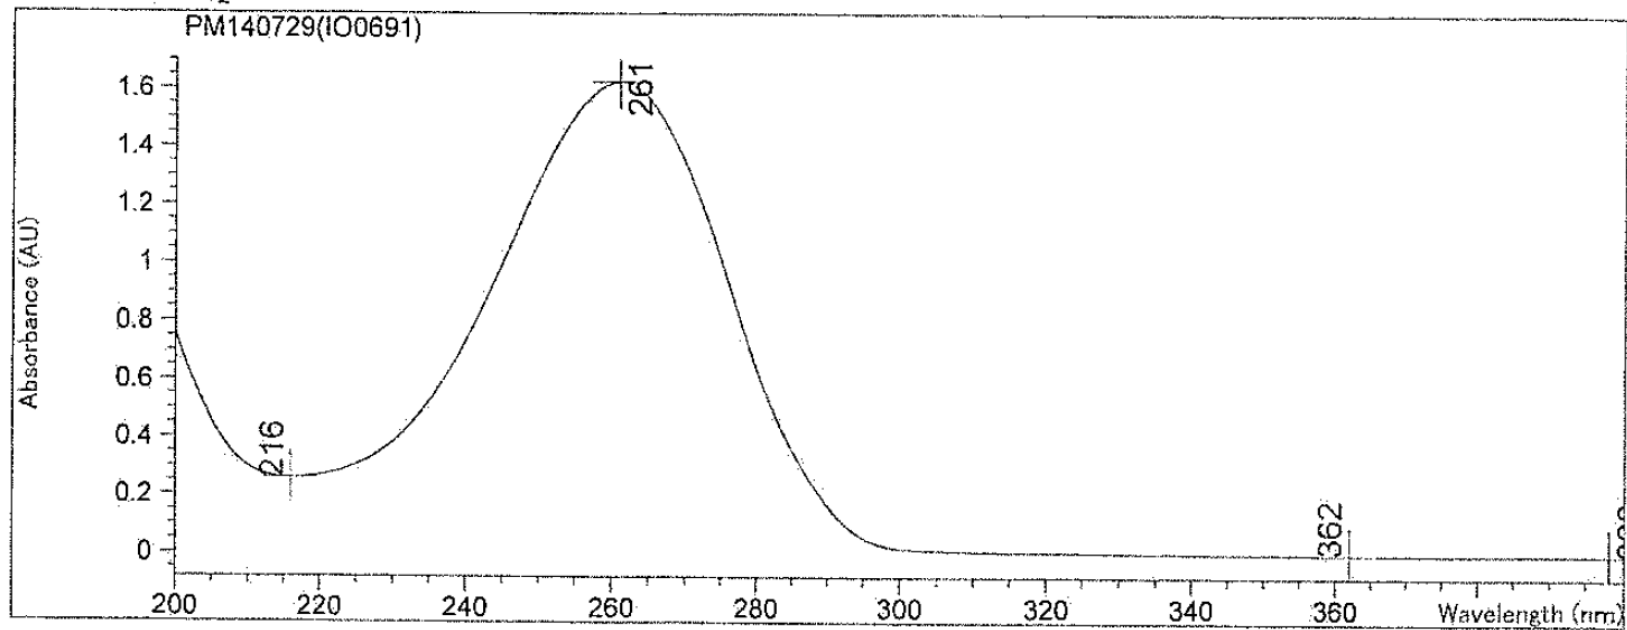

| # | Name              | Peaks (nm) | Abs (AU)   | Valleys (nm) | Abs (AU)   |
|---|-------------------|------------|------------|--------------|------------|
| 1 | PM140729 (IO0691) | 261.0      | 1.62410    | 362.0        | -6.6996E-4 |
| 1 |                   | 398.0      | -1.4067E-4 | 216.0        | 0.25793    |
| 1 |                   | ***        | ***        | ***          | ***        |

Figure S30. UV (MeOH) spectrum of enigmazole C (1).

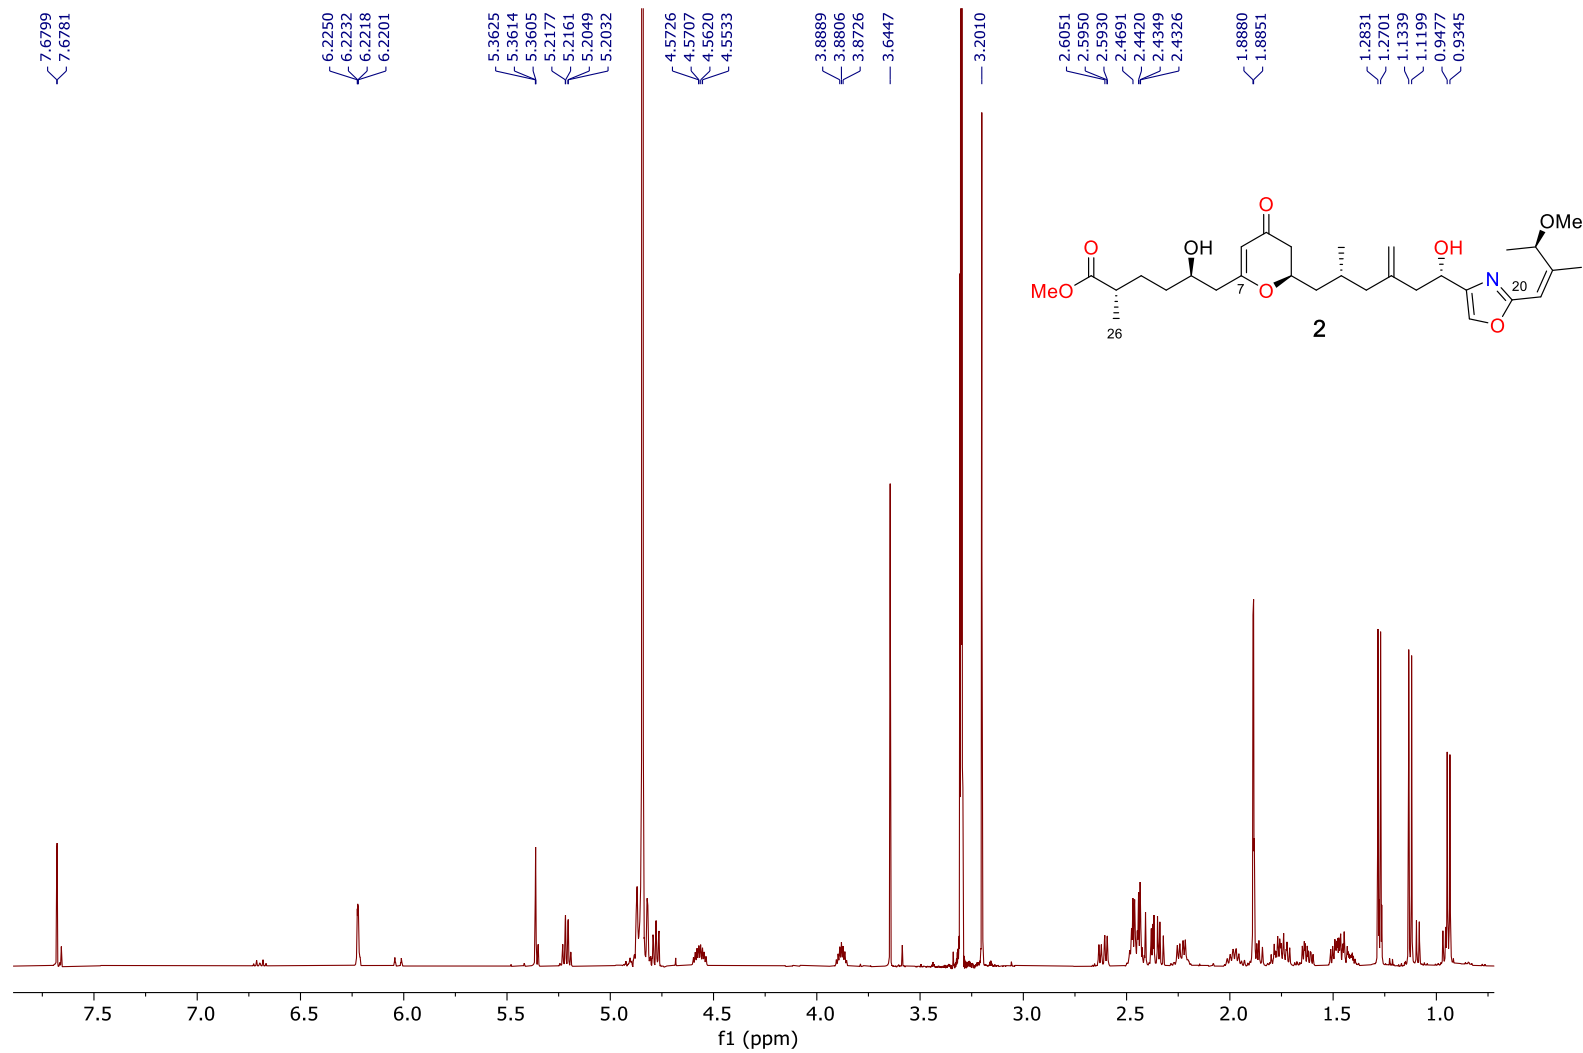

Figure S31.  $^1\text{H}$  NMR spectrum (500 MHz,  $\text{CD}_3\text{OD}$ ) of enigmazole E (**2**).

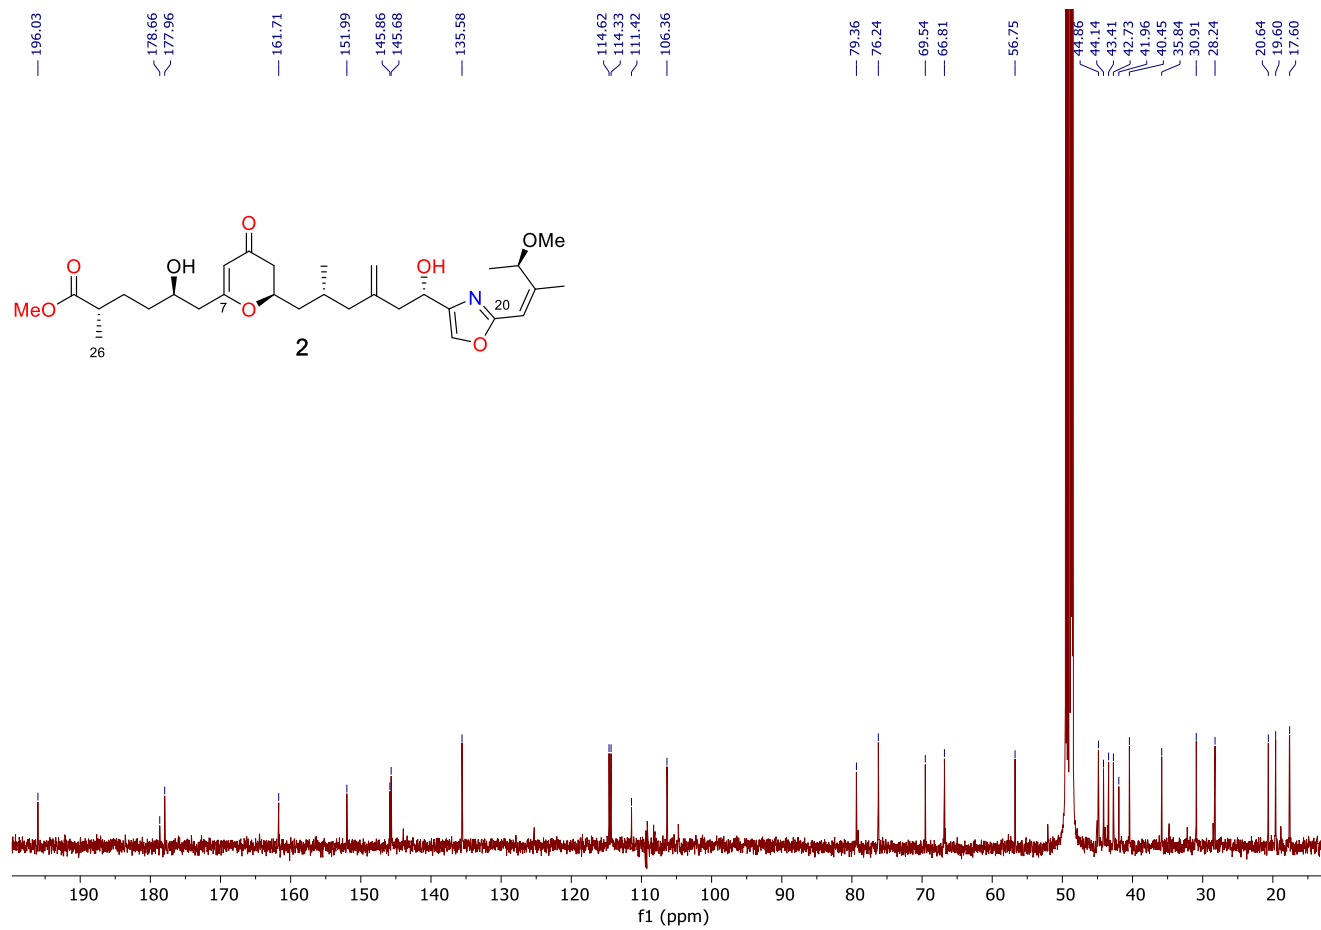

Figure S32. <sup>13</sup>C NMR spectrum (125 MHz, CD<sub>3</sub>OD) of enigmazole E (2).

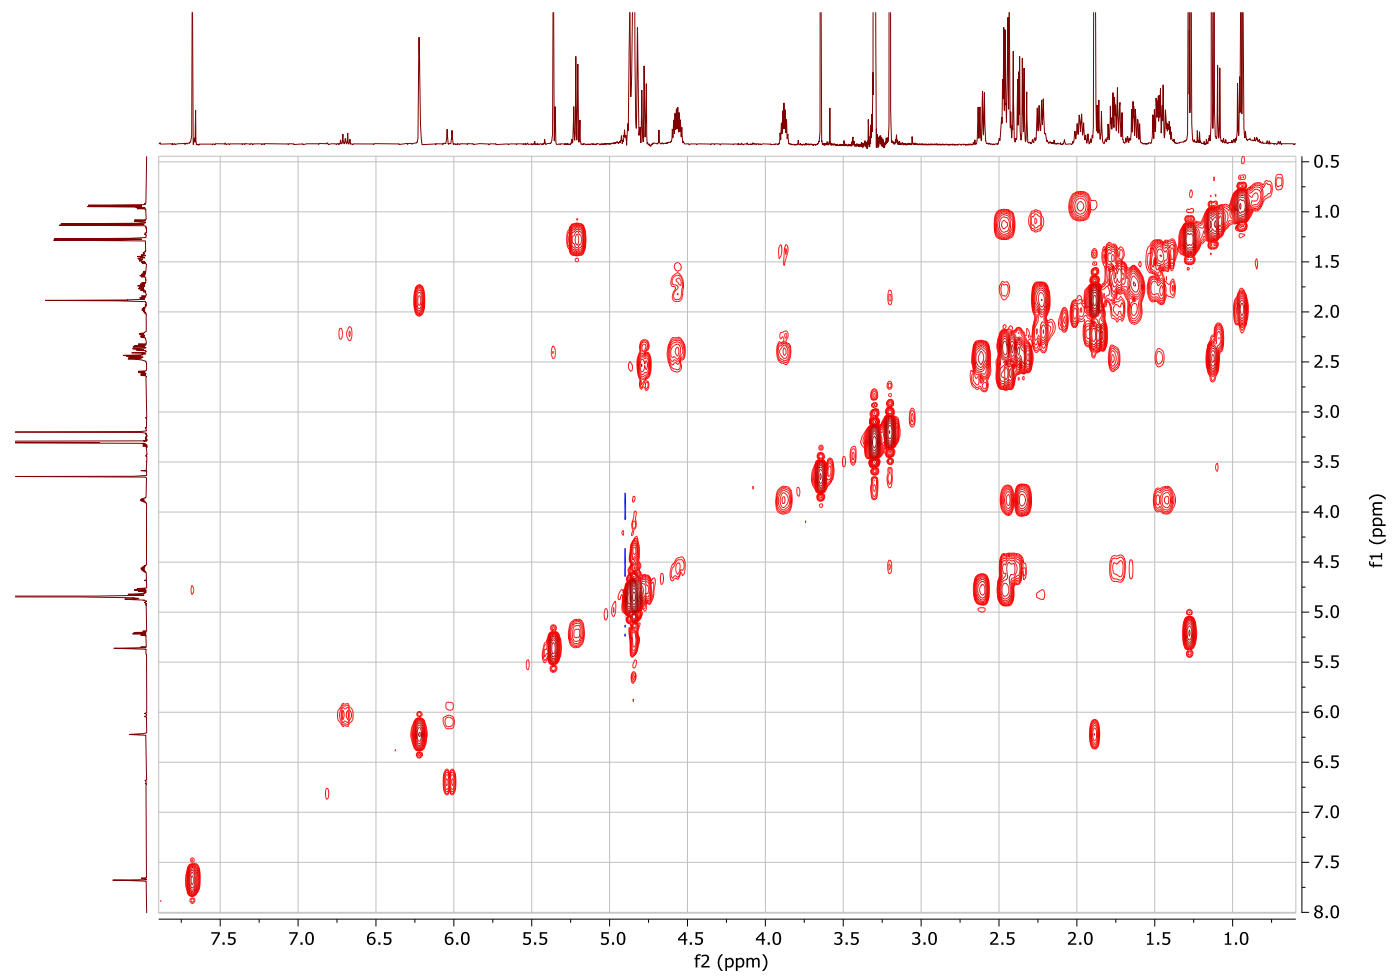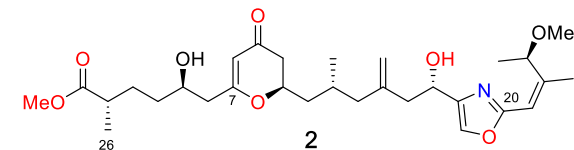

Figure S33.  $^1\text{H}$ - $^1\text{H}$  COSY spectrum (500 MHz,  $\text{CD}_3\text{OD}$ ) of enigmazole E (**2**).

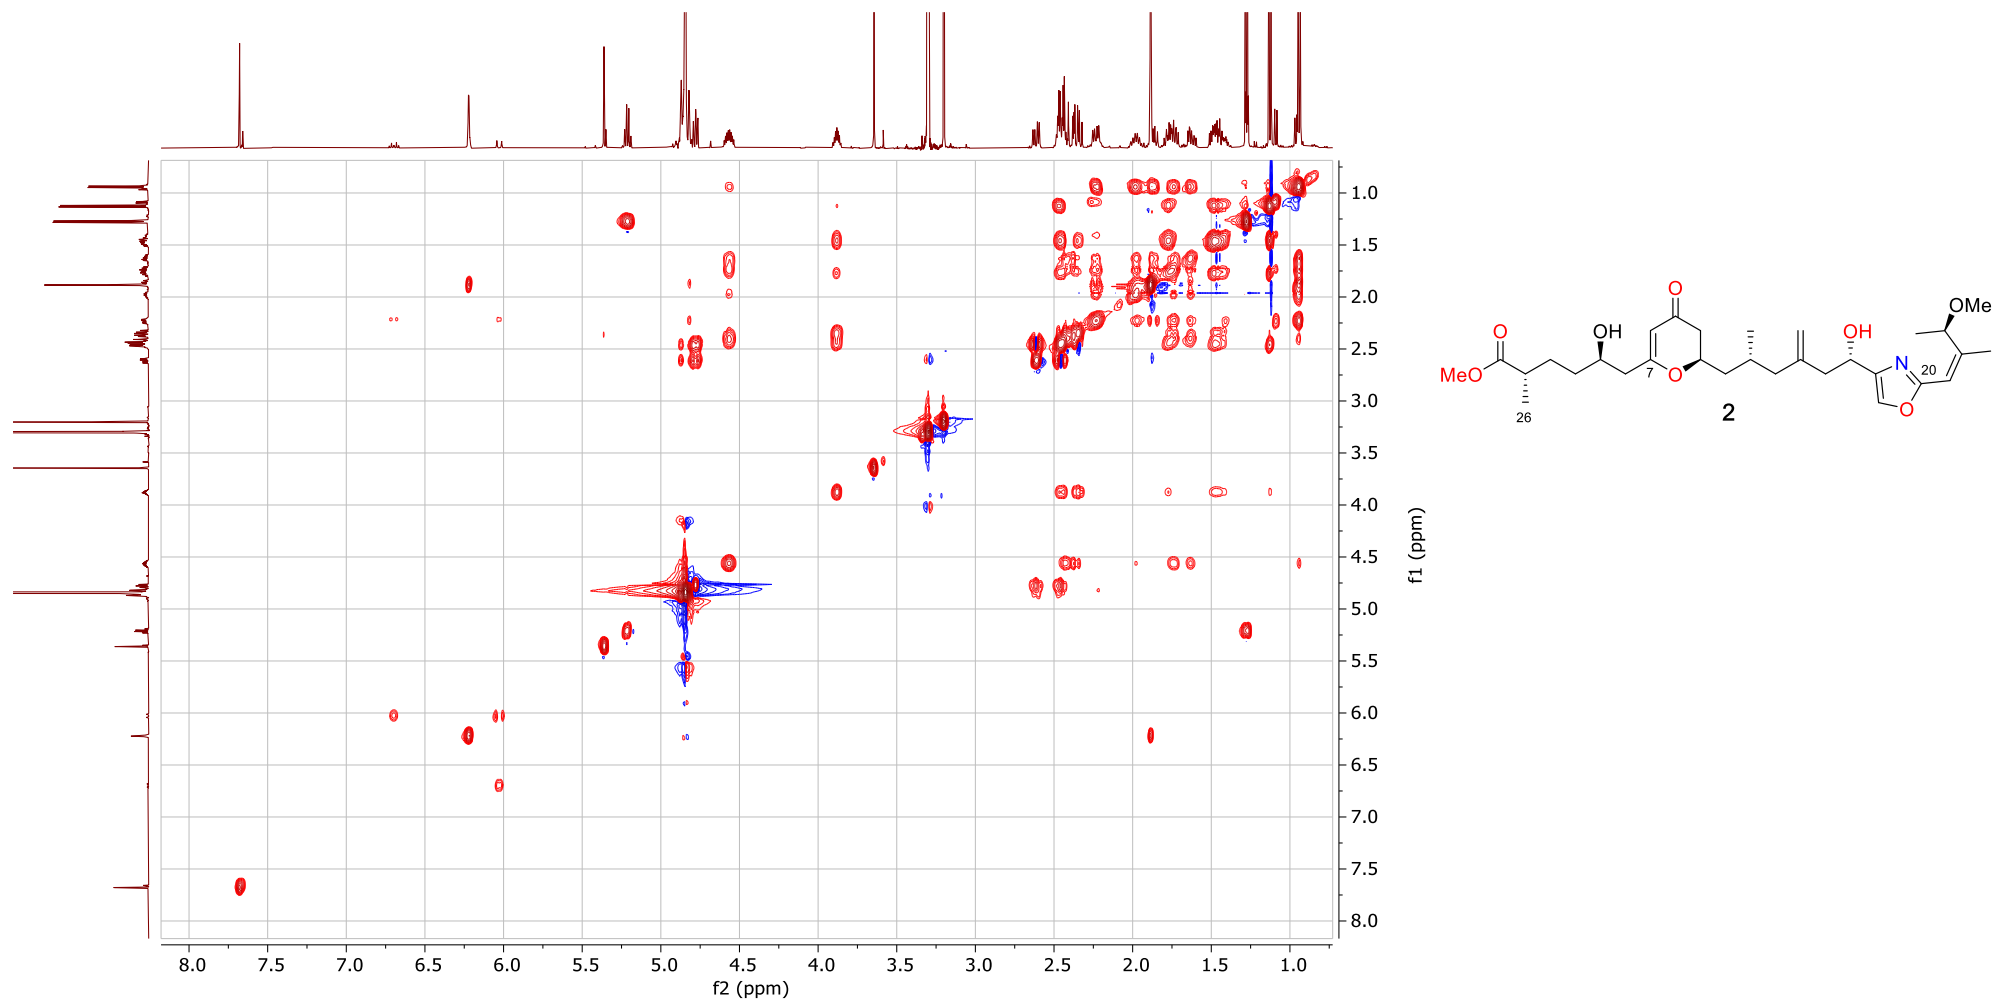

**Figure S34.**  $^1\text{H}$ - $^1\text{H}$  TOCSY spectrum (500 MHz,  $\text{CD}_3\text{OD}$ ) of enigmazole E (**2**).

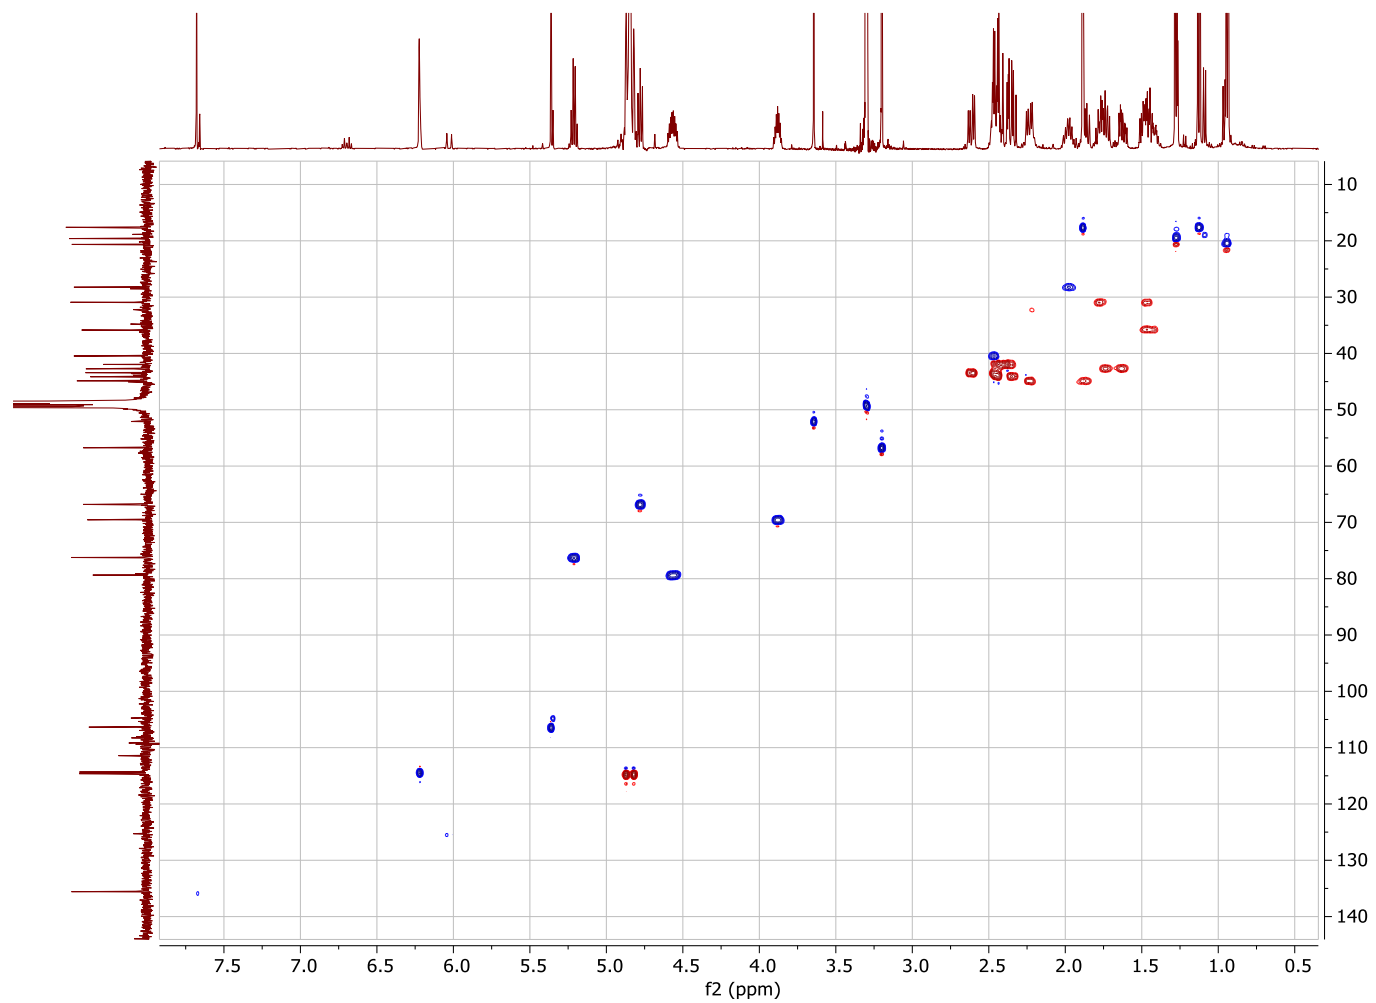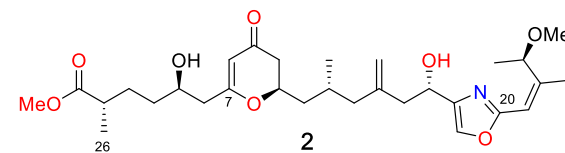

**Figure S35.** DEPT135-Edited HSQC spectrum (500 MHz, CD<sub>3</sub>OD) of enigmazole E (**2**).

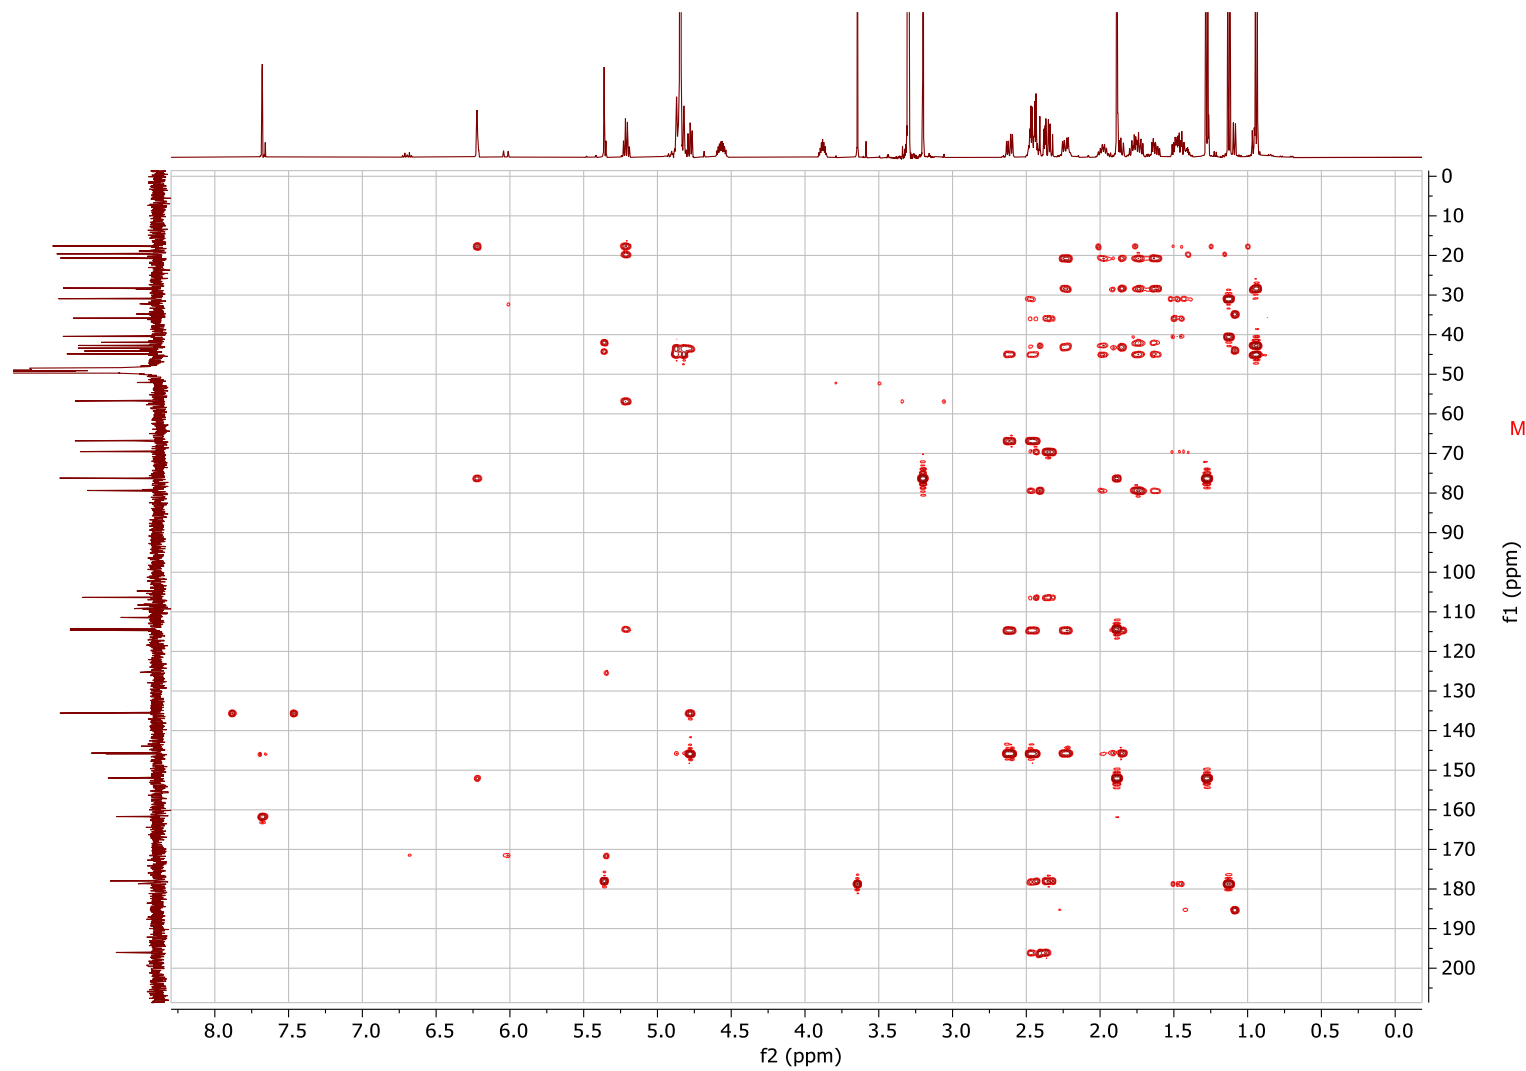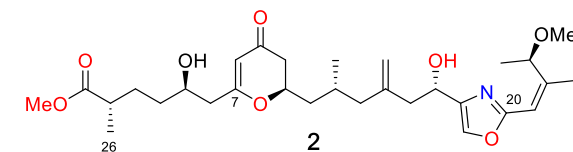

Figure S36. HMBC spectrum (500 MHz, CD<sub>3</sub>OD) of enigmazole E (**2**).

DAD1, 15.600 (892 mAU,Bln) Ref=15.193 & 15.933 of 114559H4H2H2011.D

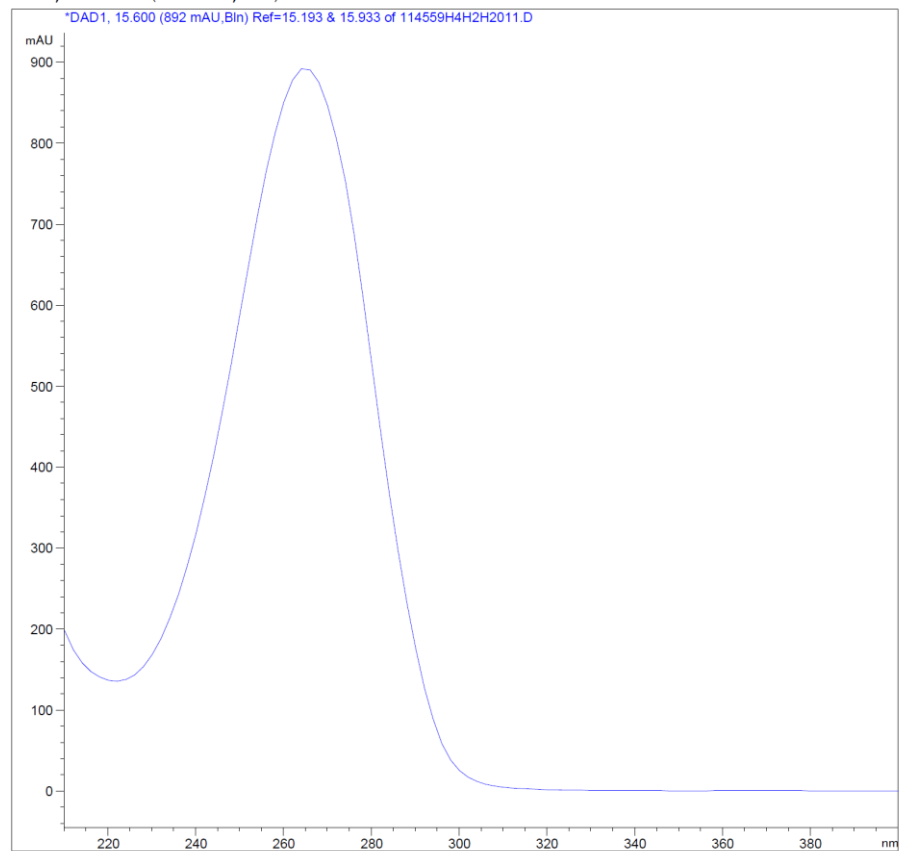

**Figure S37.** UV (MeOH) spectrum of enigmazole E (**2**).



**Table S1.** NMR data in CD<sub>3</sub>OD of enigmazole E (2)

| Position | <sup>13</sup> C NMR ppm | <sup>1</sup> H NMR ppm | m, J (Hz)                 |
|----------|-------------------------|------------------------|---------------------------|
| 1        | 178.7                   |                        |                           |
| 2        | 40.5                    | 2.46                   | m                         |
| 3        | 30.9                    | 1.78                   | m                         |
| 3        |                         | 1.46                   | m                         |
| 4        | 35.8                    | 1.47                   | m                         |
| 4        |                         | 1.43                   | m                         |
| 5        | 69.5                    | 3.88                   | dddd (8.3, 8.3, 4.2, 4.2) |
| 6        | 44.1                    | 2.45                   | m                         |
| 6        |                         | 2.34                   | dd (14.3, 8.8)            |
| 7        | 178.0                   |                        |                           |
| 8        | 106.4                   | 5.36                   | s                         |
| 9        | 196.0                   |                        |                           |
| 10       | 42.0                    | 2.44                   | dd (16.6, 13.4)           |
| 10       |                         | 2.37                   | dd (16.6, 4.0)            |
| 11       | 79.4                    | 4.56                   | dddd (13.1, 8.6, 4.3,     |
| 12       | 42.7                    | 1.74                   | ddd (14.6, 8.3, 6.4)      |
| 12       |                         | 1.63                   | ddd (14.2, 7.0, 4.8)      |
| 13       | 28.2                    | 1.98                   | m                         |
| 14       | 44.9                    | 2.23                   | dd (13.8, 5.6)            |
| 14       |                         | 1.86                   | dd (13.7, 8.3)            |
| 15       | 145.7                   |                        |                           |
| 16       | 43.4                    | 2.61                   | dd (14.2, 5.9)            |
| 16       |                         | 2.45                   | dd (14.2, 6.5)            |
| 17       | 66.8                    | 4.78                   | dd (6.9)                  |
| 18       | 145.9                   |                        |                           |
| 19       | 135.6                   | 7.67                   | d (0.8)                   |
| 20       | 161.7                   |                        |                           |
| 21       | 114.3                   | 6.22                   | dd (1.6, 0.8)             |
| 22       | 152.0                   |                        |                           |
| 23       | 76.2                    | 5.21                   | q (6.4)                   |
| 24       | 19.6                    | 1.28                   | d (6.5)                   |
| 25       | 17.6                    | 1.13                   | d (7.0)                   |
| 26       | 20.6                    | 0.94                   | d (6.5)                   |
| 27       | 114.6                   | 4.87                   | brs                       |
| 27       |                         | 4.82                   | brs                       |
| 28       | 17.6                    | 1.89                   | d (1.46)                  |
| 29       | 56.8                    | 3.20                   | s                         |
| 30       | -                       | -                      | -                         |

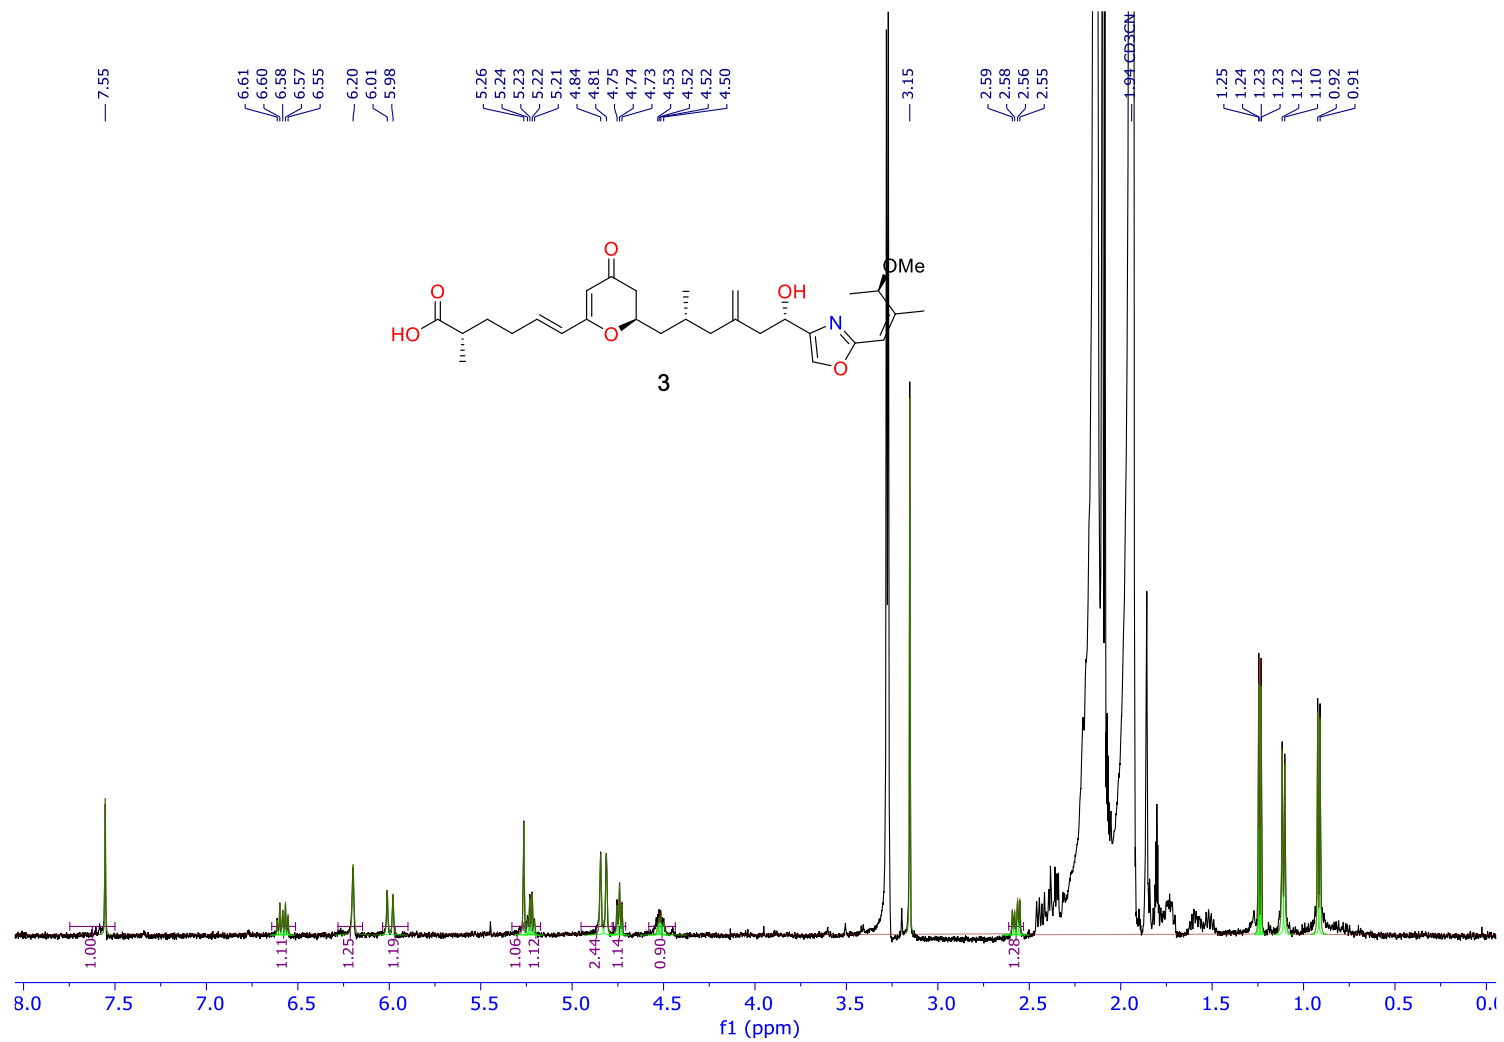

Figure S38.  $^1\text{H}$  NMR spectrum (500 MHz,  $\text{CD}_3\text{OD}$ ) of enigmazole D (3).

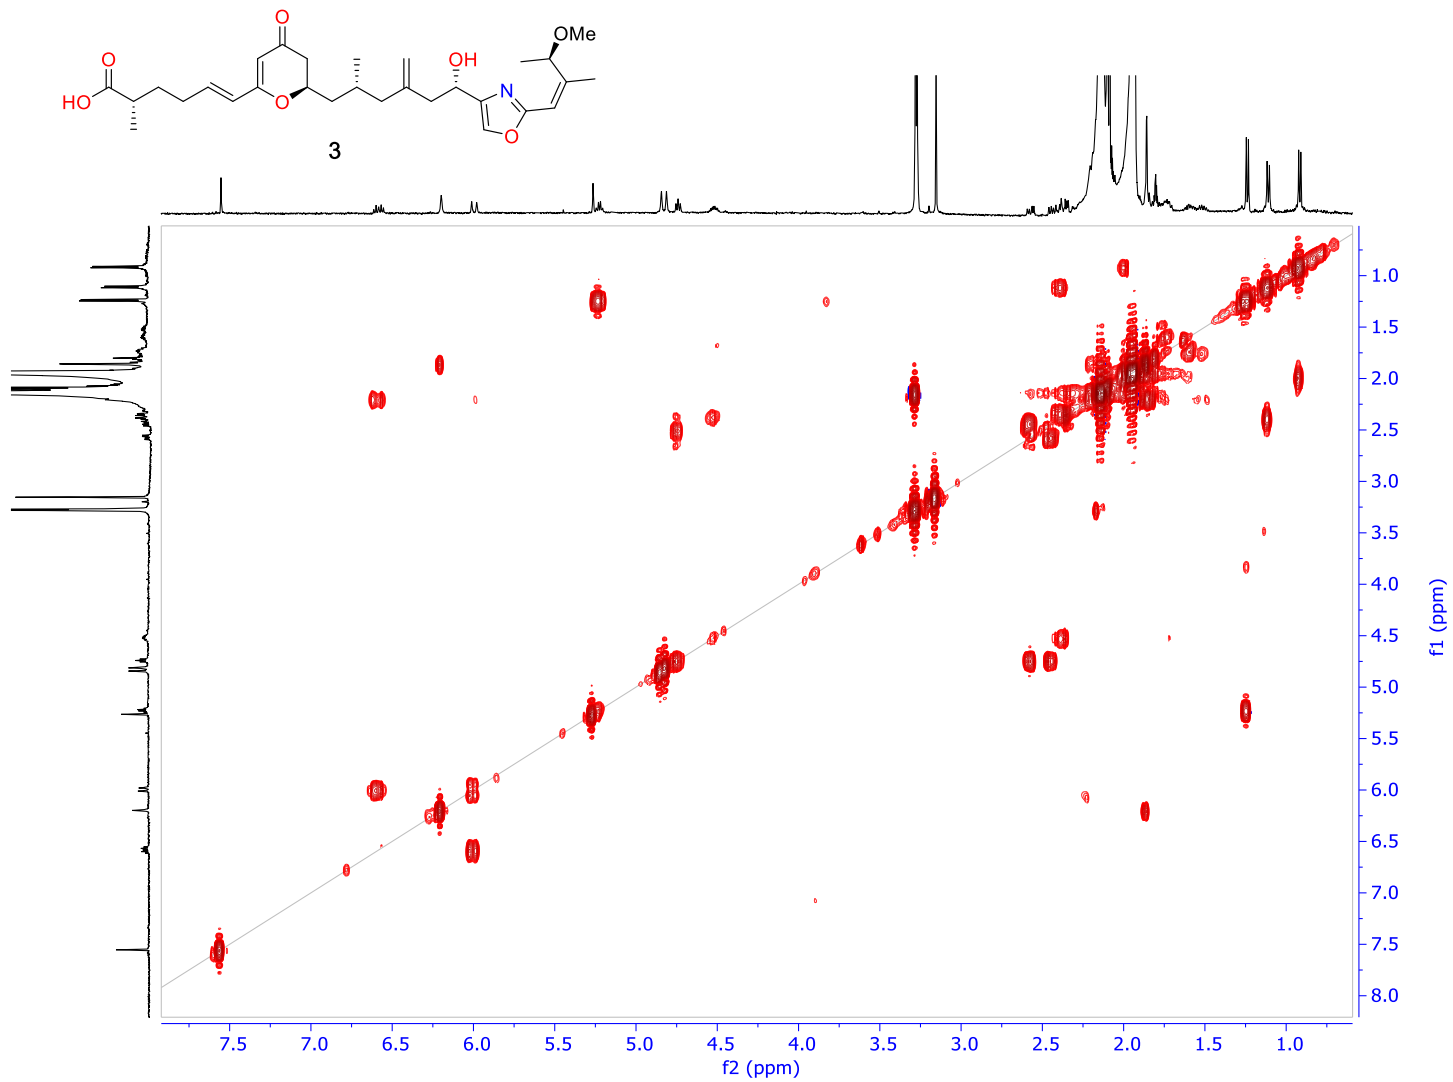

Figure S39.  $^1\text{H}$ - $^1\text{H}$  COSY spectrum (500 MHz,  $\text{CD}_3\text{OD}$ ) of enigmazole D (3)

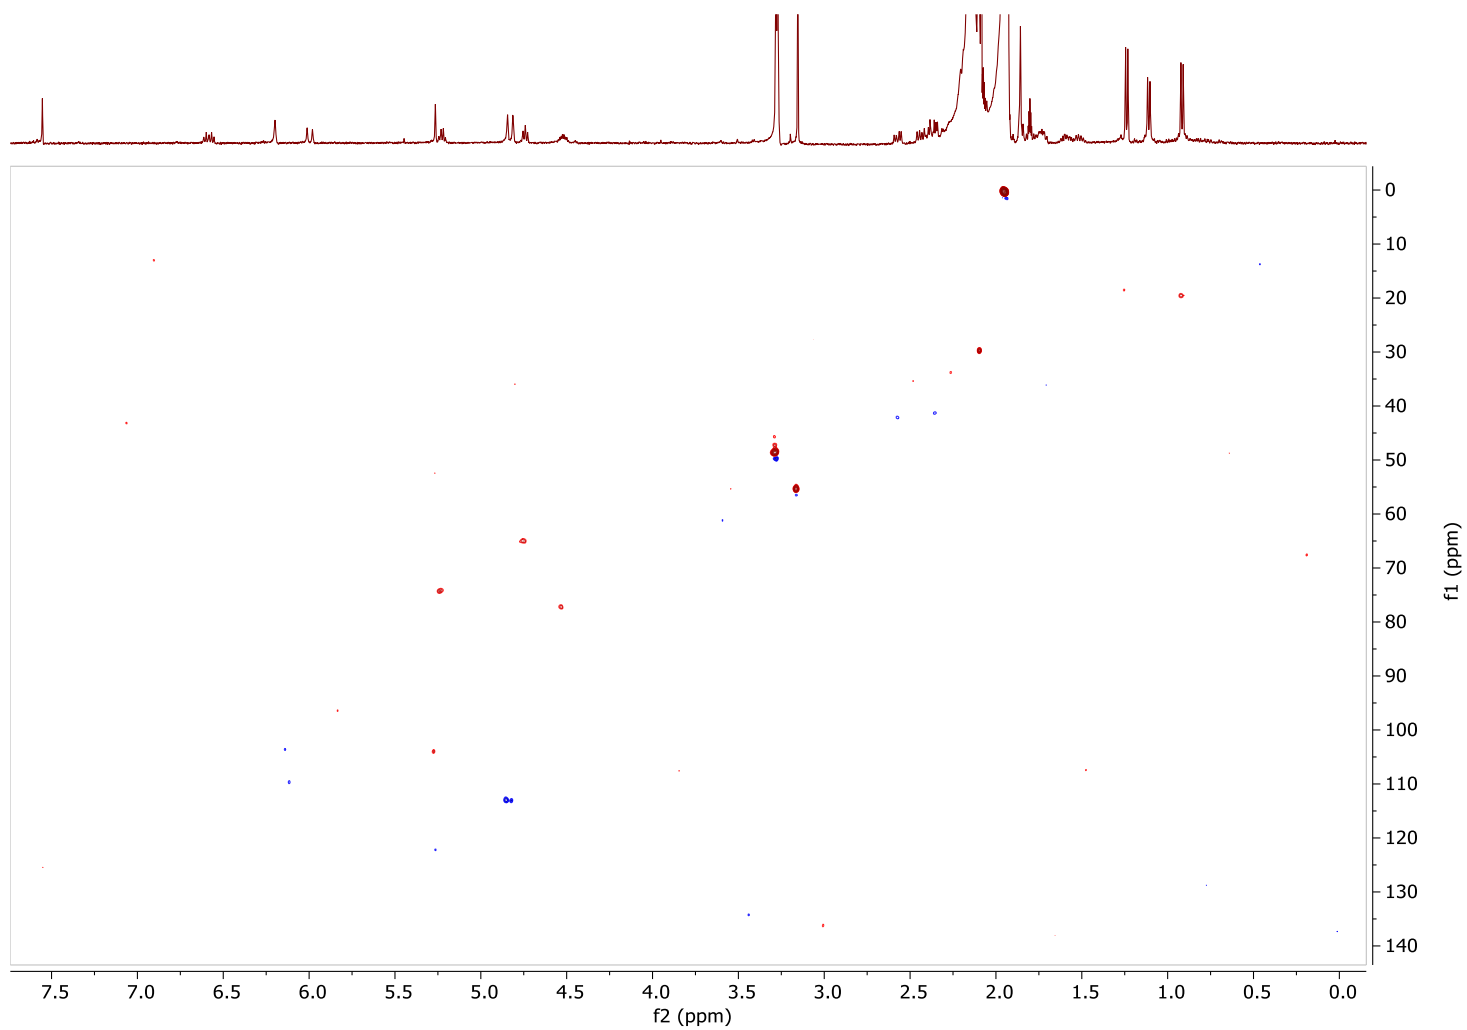

**Figure S40.** Edited-HSQC spectrum (500 MHz, CD<sub>3</sub>CN) of enigmazole D (**3**)

DAD1, 14.880 (221 mAU, Bln) Ref=14.393 & 15.173 of 114559H4H2H2011.D

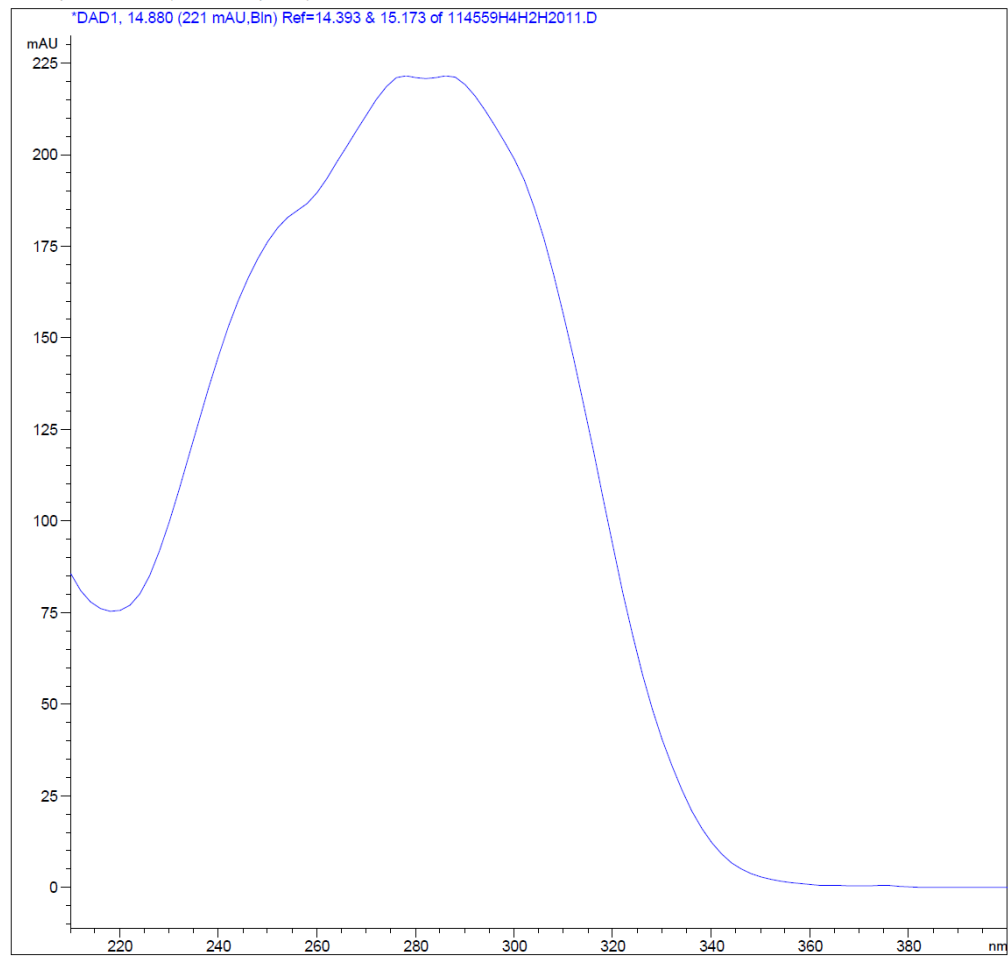

Figure S41. UV (MeOH) spectrum of enigmazole D (3).

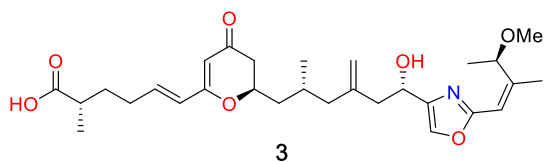

**Table S2.** NMR data in CD<sub>3</sub>CN of enigmazole D (**3**)

| Position | <sup>13</sup> C NMR ppm | <sup>1</sup> H NMR ppm | m, J (Hz)     |
|----------|-------------------------|------------------------|---------------|
| 1        | -                       |                        |               |
| 2        |                         | 2.39                   |               |
| 3        |                         | -                      |               |
| 3        |                         | -                      |               |
| 4        |                         | 2.19                   |               |
| 4        |                         |                        |               |
| 5        |                         | 6.58                   | dt, 15.6, 7.1 |
| 6        | -                       | 6.00                   | d, 15.6       |
| 7        | -                       |                        |               |
| 8        | 105.1                   | 5.26                   | s             |
| 9        | 196.0                   |                        |               |
| 10       | 42.3                    | 2.44                   |               |
| 10       |                         | 2.36                   |               |
| 11       | 78.4                    | 4.52                   | m             |
| 12       | -                       | 1.74                   |               |
| 12       |                         | 1.61                   |               |
| 13       | -                       | 1.98                   |               |
| 14       | -                       | 2.23                   |               |
| 14       |                         | 1.86                   |               |
| 15       | -                       |                        |               |
| 16       | 43.4                    | 2.57                   | dd, 14.3, 6.7 |
| 16       |                         | 2.45                   | dd, 14.3, 6.7 |
| 17       | 66.1                    | 4.74                   | t, 6.7        |
| 18       | 145.9                   |                        |               |
| 19       | -                       | 7.55                   | s             |
| 20       | 161.7                   |                        |               |
| 21       | -                       | 6.20                   | bs            |
| 22       | 152.0                   |                        |               |
| 23       | 75.4                    | 5.22                   | q, 6.5        |
| 24       | 19.6                    | 1.24                   |               |
| 25       | -                       | 1.11                   | d, 6.7        |
| 26       | 20.6                    | 0.91                   | d, 6.7        |
| 27       | 114.1                   | 4.85                   | bs            |
| 27       |                         | 4.82                   | bs            |
| -        | -                       | 1.89                   |               |
| 29       | 56.4                    | 3.15                   | s             |

**Table S3.** Calculated DFT energies of the **1a-(2S5R11R13R17S23R)** diastereoisomer.

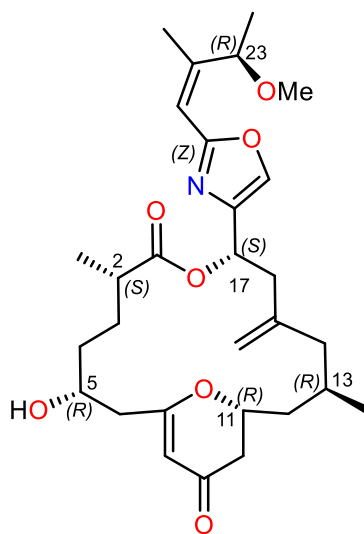

| Conformers <b>1a</b> | OPLS2008 Force Field<br>Conformational Search<br>Relative Energy (kcal/mol) | B3LYP/6-31+G(d,p)<br>DFT Energy (hartree) | $\Delta$ (DFT Energy)<br>(kcal/mol) | % Population |
|----------------------|-----------------------------------------------------------------------------|-------------------------------------------|-------------------------------------|--------------|
| <b>1a6</b>           | 0.858102294                                                                 | -1710.461923                              | 0                                   | 64.40        |
| <b>1a29</b>          | 3.018642447                                                                 | -1710.460565                              | 0.852157753                         | 15.26        |
| <b>1a1</b>           | 0                                                                           | -1710.459781                              | 1.344125116                         | 6.65         |
| <b>1a21</b>          | 2.317638623                                                                 | -1710.459393                              | 1.587598759                         | 4.40         |
| <b>1a31</b>          | 3.215033461                                                                 | -1710.459381                              | 1.595128872                         | 4.35         |
| <b>1a13</b>          | 1.829134799                                                                 | -1710.45839                               | 2.216990678                         | 1.52         |
| <b>1a11</b>          | 1.531763862                                                                 | -1710.458116                              | 2.388928252                         | 1.14         |
| <b>1a3</b>           | 0.107002868                                                                 | -1710.457939                              | 2.499997414                         | 0.94         |
| <b>1a22</b>          | 2.380234226                                                                 | -1710.456575                              | 3.355920223                         | 0.22         |
| <b>1a16</b>          | 2.030736138                                                                 | -1710.456348                              | 3.498364855                         | 0.17         |
| <b>1a2</b>           | 0.080807839                                                                 | -1710.456243                              | 3.564253341                         | 0.16         |
| <b>1a34</b>          | 3.28166826                                                                  | -1710.456065                              | 3.675950012                         | 0.13         |
| <b>1a4</b>           | 0.739268642                                                                 | -1710.455876                              | 3.794549287                         | 0.11         |
| <b>1a12</b>          | 1.58874283                                                                  | -1710.45573                               | 3.886165658                         | 0.09         |

14 conformers counting for the 99.54% of the DFT conformational population

DFT COORDINATES FOR CONFORMATIONAL SEARCH OF **1a**

(2S\*, 5R\*, 11R\*, 13R\* , 17S\*, 23R\*)

**Compound 1a:** Isomer 2S, 5R, 11R, 13R, 17S, 23R conformer 1

|   |          |          |          |
|---|----------|----------|----------|
| C | -2.81439 | 1.21179  | 1.55029  |
| C | -4.03916 | 1.38349  | 2.11606  |
| C | -5.13199 | 2.03955  | 1.39955  |
| C | -4.76046 | 2.52652  | -0.00188 |
| C | -3.68677 | 1.64237  | -0.63154 |
| O | -2.54456 | 1.52002  | 0.26034  |
| C | -1.6505  | 0.54101  | 2.21751  |
| C | -1.69819 | -0.98207 | 1.92485  |
| C | -0.42229 | -1.70245 | 2.35852  |
| C | -0.49393 | -3.23245 | 2.19811  |
| C | -0.90184 | -3.78355 | 0.80356  |
| C | 0.15406  | -3.47406 | -0.24678 |
| C | -1.14516 | -5.2966  | 0.87114  |
| O | 0.07152  | -2.1901  | -0.6833  |
| O | 0.9892   | -4.25826 | -0.64907 |
| C | 1.09517  | -1.76347 | -1.63468 |
| C | 0.56498  | -0.50076 | -2.32164 |
| C | 2.39787  | -1.52258 | -0.92756 |
| C | -0.71762 | -0.7036  | -3.12034 |
| C | -3.18685 | 2.15557  | -1.98003 |
| C | -1.90611 | 1.50885  | -2.55141 |
| C | -1.97637 | -0.03884 | -2.5996  |
| C | -0.72033 | -1.43433 | -4.24019 |
| C | -1.6138  | 2.11051  | -3.93416 |
| O | -6.24015 | 2.2308   | 1.88059  |
| O | -2.79123 | -1.59409 | 2.60448  |
| C | 3.45239  | -2.3683  | -0.78175 |
| O | 4.41864  | -1.72471 | -0.06632 |
| C | 3.89783  | -0.48361 | 0.20163  |
| N | 2.69327  | -0.32605 | -0.28376 |
| C | 4.76022  | 0.40124  | 0.95939  |
| C | 4.58526  | 1.71597  | 1.21116  |
| C | 3.38569  | 2.51866  | 0.72214  |
| C | 5.59143  | 2.46482  | 2.04648  |
| C | 2.30502  | 2.62682  | 1.80105  |
| O | 3.76402  | 3.85324  | 0.37957  |
| C | 4.42124  | 3.94982  | -0.86961 |



|   |          |          |          |
|---|----------|----------|----------|
| H | -4.1991  | 1.1076   | 3.15302  |
| H | -5.66016 | 2.55156  | -0.62435 |
| H | -4.38938 | 3.55849  | 0.08199  |
| H | -4.0866  | 0.62287  | -0.73759 |
| H | -1.68166 | 0.69582  | 3.30046  |
| H | -0.71942 | 0.96299  | 1.82314  |
| H | -1.81198 | -1.10305 | 0.83801  |
| H | -0.23263 | -1.48153 | 3.41773  |
| H | 0.41365  | -1.28501 | 1.78674  |
| H | -1.23189 | -3.61527 | 2.91035  |
| H | 0.47445  | -3.66783 | 2.47836  |
| H | -1.82872 | -3.28427 | 0.50131  |
| H | -1.44555 | -5.69588 | -0.1029  |
| H | -1.93849 | -5.51622 | 1.59312  |
| H | -0.23698 | -5.82426 | 1.17785  |
| H | 1.22222  | -2.57464 | -2.35485 |
| H | 1.3642   | -0.14255 | -2.98194 |
| H | 0.43828  | 0.2671   | -1.5536  |
| H | -3.01368 | 3.23718  | -1.89915 |
| H | -4.0142  | 2.02946  | -2.69325 |
| H | -1.08534 | 1.78577  | -1.8787  |
| H | -2.16474 | -0.41276 | -1.58465 |
| H | -2.82993 | -0.34343 | -3.22075 |
| H | -1.62733 | -1.59285 | -4.81807 |
| H | 0.1814   | -1.90928 | -4.622   |
| H | -0.67152 | 1.73505  | -4.3445  |
| H | -1.5491  | 3.20384  | -3.88262 |
| H | -2.40764 | 1.8563   | -4.64891 |
| H | -3.60503 | -1.14689 | 2.31745  |
| H | 3.6453   | -3.38786 | -1.07193 |
| H | 5.64407  | -0.09573 | 1.3522   |
| H | 2.95037  | 2.0238   | -0.15461 |
| H | 6.38336  | 1.80293  | 2.40876  |
| H | 6.0491   | 3.28258  | 1.47918  |
| H | 5.10893  | 2.93222  | 2.91448  |
| H | 1.47262  | 3.22859  | 1.42262  |
| H | 1.93556  | 1.63121  | 2.06413  |
| H | 2.69381  | 3.111    | 2.70298  |
| H | 4.63401  | 5.00931  | -1.03597 |
| H | 5.36896  | 3.38985  | -0.88999 |
| H | 3.78595  | 3.57909  | -1.68911 |

**Compound 1a:** Isomer 2S, 5R, 11R, 13R, 17S, 23R conformer 2

|   |          |          |          |
|---|----------|----------|----------|
| C | 2.9488   | -2.13843 | -0.37577 |
| C | 4.01704  | -2.67306 | 0.27003  |
| C | 5.3326   | -2.04634 | 0.23379  |
| C | 5.4022   | -0.79609 | -0.64375 |
| C | 4.07484  | -0.04111 | -0.64365 |
| O | 2.97555  | -0.92884 | -0.98709 |
| C | 1.59779  | -2.79225 | -0.45598 |
| C | 0.75144  | -2.63079 | 0.83723  |
| C | 0.47851  | -1.16091 | 1.18958  |
| C | -0.22303 | -0.9906  | 2.54639  |
| C | -0.09961 | 0.41505  | 3.19514  |
| C | -0.90178 | 1.48221  | 2.45947  |
| C | -0.51378 | 0.38516  | 4.67151  |
| O | -0.38762 | 1.73373  | 1.22545  |
| O | -1.87137 | 2.06119  | 2.89818  |
| C | -1.07393 | 2.71836  | 0.4164   |
| C | -0.16392 | 2.99812  | -0.79444 |
| C | -2.42761 | 2.22594  | -0.00956 |
| C | 1.20277  | 3.56043  | -0.43078 |
| C | 4.05273  | 1.12317  | -1.62928 |
| C | 2.75435  | 1.95161  | -1.73192 |
| C | 2.37953  | 2.60719  | -0.37613 |
| C | 1.34491  | 4.86361  | -0.16434 |
| C | 2.91825  | 2.9947   | -2.84811 |
| O | 6.32174  | -2.497   | 0.79711  |
| O | -0.42754 | -3.41587 | 0.75035  |
| C | -3.60526 | 2.90032  | -0.07592 |
| O | -4.5496  | 2.05728  | -0.59183 |
| C | -3.89149 | 0.87668  | -0.80317 |
| N | -2.62353 | 0.94071  | -0.48993 |
| C | -4.69178 | -0.20744 | -1.35183 |
| C | -4.45347 | -1.53341 | -1.2748  |
| C | -3.29185 | -2.1187  | -0.48552 |
| C | -5.36891 | -2.51193 | -1.96485 |
| C | -3.74785 | -3.13693 | 0.56034  |
| O | -2.36078 | -2.81634 | -1.34637 |
| C | -1.81031 | -2.01844 | -2.3926  |
| H | 3.92084  | -3.63174 | 0.76847  |

|   |          |          |          |
|---|----------|----------|----------|
| H | 6.21275  | -0.15239 | -0.28896 |
| H | 5.65418  | -1.11    | -1.66742 |
| H | 3.86988  | 0.30824  | 0.37897  |
| H | 1.71295  | -3.86565 | -0.63603 |
| H | 1.05219  | -2.36045 | -1.30342 |
| H | 1.32232  | -3.08    | 1.66028  |
| H | -0.10412 | -0.68721 | 0.39104  |
| H | 1.44105  | -0.63376 | 1.21789  |
| H | 0.22157  | -1.69767 | 3.25979  |
| H | -1.28012 | -1.27106 | 2.46872  |
| H | 0.95531  | 0.71562  | 3.12234  |
| H | -0.41616 | 1.37217  | 5.13313  |
| H | 0.11562  | -0.32033 | 5.22412  |
| H | -1.55806 | 0.07518  | 4.77834  |
| H | -1.19482 | 3.62844  | 1.01226  |
| H | -0.70183 | 3.71152  | -1.42948 |
| H | -0.07321 | 2.06978  | -1.36838 |
| H | 4.29121  | 0.72233  | -2.62374 |
| H | 4.88348  | 1.79065  | -1.35846 |
| H | 1.94806  | 1.26426  | -2.01838 |
| H | 2.15116  | 1.81417  | 0.34741  |
| H | 3.25453  | 3.15104  | 0.00588  |
| H | 2.30448  | 5.28958  | 0.11757  |
| H | 0.50681  | 5.5563   | -0.21272 |
| H | 1.99923  | 3.56731  | -3.00491 |
| H | 3.18492  | 2.51447  | -3.79689 |
| H | 3.71201  | 3.71205  | -2.60154 |
| H | -0.93889 | -3.17609 | -0.05016 |
| H | -3.93268 | 3.89203  | 0.19191  |
| H | -5.59087 | 0.13482  | -1.86044 |
| H | -2.75462 | -1.30574 | 0.00791  |
| H | -6.07349 | -2.00536 | -2.63067 |
| H | -4.78517 | -3.23065 | -2.55272 |
| H | -5.94831 | -3.09838 | -1.24069 |
| H | -2.88782 | -3.46353 | 1.15121  |
| H | -4.48317 | -2.68297 | 1.23344  |
| H | -4.19716 | -4.01615 | 0.08898  |
| H | -1.04413 | -2.63091 | -2.87525 |
| H | -2.57137 | -1.7504  | -3.13658 |
| H | -1.36373 | -1.09435 | -2.00479 |

**Compound 1a:** Isomer 2S, 5R, 11R, 13R, 17S, 23R conformer 3

|   |          |          |          |
|---|----------|----------|----------|
| C | -2.87036 | 1.16771  | 1.53203  |
| C | -4.07766 | 1.40864  | 2.09838  |
| C | -5.14858 | 2.07901  | 1.36943  |
| C | -4.77235 | 2.5054   | -0.05066 |
| C | -3.72402 | 1.57659  | -0.6597  |
| O | -2.58558 | 1.4412   | 0.23402  |
| C | -1.71415 | 0.49941  | 2.21724  |
| C | -1.69416 | -1.01997 | 1.91832  |
| C | -0.38722 | -1.68783 | 2.3672   |
| C | -0.40241 | -3.22274 | 2.24226  |
| C | -0.78535 | -3.82167 | 0.86115  |
| C | 0.26045  | -3.49605 | -0.19452 |
| C | -0.97035 | -5.34091 | 0.96363  |
| O | 0.13901  | -2.22114 | -0.64536 |
| O | 1.1159   | -4.26174 | -0.58941 |
| C | 1.14208  | -1.77825 | -1.6116  |
| C | 0.56562  | -0.54476 | -2.31313 |
| C | 2.44086  | -1.48624 | -0.9174  |
| C | -0.71891 | -0.80095 | -3.09404 |
| C | -3.21619 | 2.0585   | -2.01841 |
| C | -1.92977 | 1.40906  | -2.57201 |
| C | -1.98561 | -0.13921 | -2.58866 |
| C | -0.71557 | -1.57151 | -4.18681 |
| C | -1.63691 | 1.98479  | -3.96584 |
| O | -6.24547 | 2.33263  | 1.85015  |
| O | -2.84427 | -1.6651  | 2.46477  |
| C | 3.52868  | -2.29026 | -0.78125 |
| O | 4.47647  | -1.60888 | -0.07602 |
| C | 3.91053  | -0.38852 | 0.19595  |
| N | 2.69588  | -0.27856 | -0.27716 |
| C | 4.74606  | 0.53084  | 0.94273  |
| C | 4.52567  | 1.83995  | 1.18811  |
| C | 3.2942   | 2.59577  | 0.7031   |
| C | 5.51069  | 2.63068  | 2.00975  |
| C | 2.21933  | 2.67486  | 1.79036  |
| O | 3.62247  | 3.93977  | 0.34664  |
| C | 4.26454  | 4.04884  | -0.90952 |
| H | -4.25693 | 1.13183  | 3.13076  |
| H | -5.67544 | 2.53124  | -0.66838 |

|   |          |          |          |
|---|----------|----------|----------|
| H | -4.37713 | 3.53096  | -0.00497 |
| H | -4.15186 | 0.56722  | -0.74656 |
| H | -1.77254 | 0.65874  | 3.30106  |
| H | -0.78    | 0.95021  | 1.86114  |
| H | -1.79724 | -1.14926 | 0.83768  |
| H | -0.19477 | -1.43554 | 3.42212  |
| H | 0.4379   | -1.25448 | 1.79112  |
| H | -1.12916 | -3.62156 | 2.95883  |
| H | 0.5786   | -3.61648 | 2.5393   |
| H | -1.73004 | -3.36584 | 0.54623  |
| H | -1.25234 | -5.77223 | -0.00197 |
| H | -1.75811 | -5.57489 | 1.68732  |
| H | -0.04381 | -5.82719 | 1.28381  |
| H | 1.28975  | -2.59716 | -2.31885 |
| H | 1.34602  | -0.17155 | -2.98774 |
| H | 0.42229  | 0.23077  | -1.55596 |
| H | -3.04674 | 3.14232  | -1.96198 |
| H | -4.03954 | 1.91442  | -2.7329  |
| H | -1.11391 | 1.7068   | -1.9022  |
| H | -2.17402 | -0.49222 | -1.56633 |
| H | -2.83452 | -0.46574 | -3.20479 |
| H | -1.62341 | -1.76565 | -4.75228 |
| H | 0.19163  | -2.04458 | -4.55793 |
| H | -0.68996 | 1.60948  | -4.36584 |
| H | -1.58182 | 3.07949  | -3.93639 |
| H | -2.42604 | 1.70953  | -4.67801 |
| H | -2.7839  | -1.61029 | 3.43287  |
| H | 3.75856  | -3.3018  | -1.07279 |
| H | 5.65078  | 0.06855  | 1.33039  |
| H | 2.86939  | 2.07839  | -0.16569 |
| H | 6.32963  | 2.001    | 2.36943  |
| H | 5.93257  | 3.46076  | 1.43279  |
| H | 5.01849  | 3.08611  | 2.87864  |
| H | 1.36283  | 3.24315  | 1.41407  |
| H | 1.88785  | 1.66893  | 2.06472  |
| H | 2.59815  | 3.18036  | 2.68485  |
| H | 3.6348   | 3.64991  | -1.71995 |
| H | 4.43921  | 5.11362  | -1.08597 |
| H | 5.23069  | 3.52151  | -0.93429 |

**Compound 1a:** Isomer 2S, 5R, 11R, 13R, 17S, 23R conformer 4

|   |          |          |          |
|---|----------|----------|----------|
| C | -1.12248 | 1.99234  | 1.33796  |
| C | -1.37007 | 3.18039  | 1.94856  |
| C | -1.94065 | 4.31122  | 1.21884  |
| C | -2.18873 | 4.03327  | -0.26463 |
| C | -2.57052 | 2.57142  | -0.48512 |
| O | -1.55097 | 1.70003  | 0.08449  |
| C | -0.37562 | 0.84412  | 1.95106  |
| C | -1.30011 | -0.34443 | 2.29873  |
| C | -0.49765 | -1.59421 | 2.66577  |
| C | -1.32005 | -2.89226 | 2.7257   |
| C | -2.05052 | -3.31722 | 1.42051  |
| C | -1.08794 | -3.39479 | 0.24091  |
| C | -2.76415 | -4.66137 | 1.61113  |
| O | -0.9048  | -2.17197 | -0.31979 |
| O | -0.53898 | -4.40126 | -0.15707 |
| C | 0.02887  | -2.07008 | -1.43834 |
| C | -0.28604 | -0.75272 | -2.16722 |
| C | 1.44953  | -2.1302  | -0.95415 |
| C | -1.64925 | -0.71049 | -2.83106 |
| C | -2.75609 | 2.20035  | -1.95854 |
| C | -3.57957 | 0.93259  | -2.29595 |
| C | -2.87575 | -0.41105 | -1.97581 |
| C | -1.76494 | -0.93696 | -4.14521 |
| C | -4.98016 | 0.96629  | -1.66189 |
| O | -2.15163 | 5.40727  | 1.71943  |
| O | -2.14486 | -0.04416 | 3.41035  |
| C | 2.26127  | -3.21738 | -0.86696 |
| O | 3.47263  | -2.80784 | -0.39615 |
| C | 3.34718  | -1.45335 | -0.21145 |
| N | 2.15401  | -1.01188 | -0.51841 |
| C | 4.54769  | -0.79191 | 0.26419  |
| C | 4.80917  | 0.5299   | 0.34695  |
| C | 3.82253  | 1.62063  | -0.05171 |
| C | 6.14392  | 0.99904  | 0.86728  |
| C | 3.21265  | 2.30988  | 1.17123  |
| O | 4.4724   | 2.64278  | -0.81214 |
| C | 4.76276  | 2.25969  | -2.14327 |
| H | -1.03515 | 3.34494  | 2.96679  |
| H | -2.9785  | 4.69881  | -0.62523 |
| H | -1.27198 | 4.27287  | -0.82335 |
| H | -3.48919 | 2.37012  | 0.08429  |

|   |          |          |          |
|---|----------|----------|----------|
| H | 0.1401   | 1.17834  | 2.85694  |
| H | 0.37713  | 0.50518  | 1.22837  |
| H | -1.90871 | -0.55188 | 1.41024  |
| H | -0.04231 | -1.42294 | 3.64993  |
| H | 0.32377  | -1.70451 | 1.9508   |
| H | -2.08389 | -2.79712 | 3.50601  |
| H | -0.6568  | -3.71299 | 3.02913  |
| H | -2.79117 | -2.54689 | 1.17813  |
| H | -3.33887 | -4.93857 | 0.72119  |
| H | -3.45375 | -4.60524 | 2.46012  |
| H | -2.04069 | -5.45977 | 1.80096  |
| H | -0.15959 | -2.92474 | -2.09302 |
| H | 0.49503  | -0.62304 | -2.92499 |
| H | -0.17716 | 0.06774  | -1.45091 |
| H | -1.7652  | 2.14197  | -2.42639 |
| H | -3.26478 | 3.05262  | -2.42865 |
| H | -3.71818 | 0.96352  | -3.38552 |
| H | -2.60911 | -0.43997 | -0.91739 |
| H | -3.61327 | -1.20991 | -2.13155 |
| H | -2.73033 | -0.93523 | -4.64719 |
| H | -0.89935 | -1.13531 | -4.77314 |
| H | -5.60947 | 0.17029  | -2.07571 |
| H | -5.4849  | 1.92197  | -1.84988 |
| H | -4.94394 | 0.81563  | -0.57602 |
| H | -2.65052 | 0.75584  | 3.19293  |
| H | 2.13039  | -4.27029 | -1.05478 |
| H | 5.32047  | -1.49458 | 0.56752  |
| H | 3.01625  | 1.17797  | -0.64861 |
| H | 6.80396  | 0.15834  | 1.09897  |
| H | 6.639    | 1.65038  | 0.13926  |
| H | 6.0216   | 1.59799  | 1.77915  |
| H | 2.48837  | 3.06308  | 0.84624  |
| H | 2.70328  | 1.58015  | 1.80768  |
| H | 3.98464  | 2.81361  | 1.76165  |
| H | 5.21137  | 3.12853  | -2.63236 |
| H | 5.47124  | 1.41855  | -2.19215 |
| H | 3.85017  | 1.97264  | -2.68851 |

**Compound 1a:** Isomer 2S, 5R, 11R, 13R, 17S, 23R conformer 6

|   |          |          |          |
|---|----------|----------|----------|
| C | -5.15153 | -0.2362  | 0.5308   |
| C | -5.91413 | -0.42719 | -0.57305 |

|   |          |          |          |
|---|----------|----------|----------|
| C | -6.08427 | 0.61384  | -1.58352 |
| C | -5.37976 | 1.92864  | -1.24948 |
| C | -4.09164 | 1.68556  | -0.46939 |
| O | -4.35931 | 0.85925  | 0.70686  |
| C | -5.0998  | -1.16864 | 1.70886  |
| C | -3.69398 | -1.71412 | 2.06036  |
| C | -3.01154 | -2.43301 | 0.88571  |
| C | -1.7395  | -3.17629 | 1.31829  |
| C | -0.85681 | -3.65282 | 0.14439  |
| C | -0.41047 | -2.46565 | -0.69849 |
| C | 0.35728  | -4.45884 | 0.64128  |
| O | 0.26832  | -1.56642 | 0.05216  |
| O | -0.64829 | -2.31431 | -1.87996 |
| C | 0.62049  | -0.30233 | -0.58905 |
| C | 0.55113  | 0.76106  | 0.51941  |
| C | 1.95851  | -0.42314 | -1.25244 |
| C | 0.41286  | 2.16895  | -0.0292  |
| C | -3.4282  | 2.96876  | 0.02565  |
| C | -2.00445 | 2.82799  | 0.60657  |
| C | -0.96199 | 2.58396  | -0.51729 |
| C | 1.46173  | 2.99633  | -0.09055 |
| C | -1.64658 | 4.07024  | 1.43418  |
| O | -6.77996 | 0.48588  | -2.58096 |
| O | -2.86472 | -0.68886 | 2.60382  |
| C | 2.22134  | -0.74673 | -2.54657 |
| O | 3.5746   | -0.79429 | -2.70696 |
| C | 4.08982  | -0.49193 | -1.47071 |
| N | 3.16169  | -0.27202 | -0.57586 |
| C | 5.53651  | -0.49163 | -1.38611 |
| C | 6.30807  | -0.12318 | -0.34141 |
| C | 5.75159  | 0.37149  | 0.98842  |
| C | 7.80792  | -0.23335 | -0.43682 |
| C | 5.62356  | -0.76845 | 2.00218  |
| O | 6.6078   | 1.35571  | 1.57192  |
| C | 6.48269  | 2.6335   | 0.9794   |
| H | -6.49261 | -1.33786 | -0.67904 |
| H | -5.16949 | 2.46881  | -2.17728 |
| H | -6.0675  | 2.54759  | -0.65484 |
| H | -3.40611 | 1.0976   | -1.09642 |
| H | -5.78475 | -2.00139 | 1.52079  |
| H | -5.47032 | -0.63085 | 2.59206  |



|   |          |          |          |
|---|----------|----------|----------|
| H | -3.83059 | -2.43229 | 2.87924  |
| H | -2.77357 | -1.68624 | 0.11557  |
| H | -3.71806 | -3.13455 | 0.42025  |
| H | -2.01739 | -4.05416 | 1.91785  |
| H | -1.14726 | -2.52163 | 1.96531  |
| H | -1.45039 | -4.27687 | -0.53348 |
| H | 0.97859  | -4.80004 | -0.19405 |
| H | 0.02045  | -5.34272 | 1.1941   |
| H | 0.98052  | -3.85362 | 1.30685  |
| H | -0.13239 | -0.12135 | -1.35977 |
| H | 1.4436   | 0.67494  | 1.14465  |
| H | -0.31187 | 0.50343  | 1.14496  |
| H | -4.09289 | 3.40755  | 0.78115  |
| H | -3.40371 | 3.6779   | -0.81351 |
| H | -1.99689 | 1.96385  | 1.28459  |
| H | -1.34665 | 1.81168  | -1.19933 |
| H | -0.87816 | 3.50222  | -1.11355 |
| H | 1.37496  | 4.00041  | -0.49943 |
| H | 2.44569  | 2.69367  | 0.25768  |
| H | -0.62778 | 4.00306  | 1.82725  |
| H | -2.3322  | 4.19042  | 2.28071  |
| H | -1.70915 | 4.97903  | 0.82087  |
| H | -2.98907 | 0.09205  | 2.03842  |
| H | 1.61111  | -0.98368 | -3.40305 |
| H | 6.01739  | -0.84805 | -2.2939  |
| H | 4.75559  | 0.8019   | 0.82731  |
| H | 8.117    | -0.66471 | -1.39337 |
| H | 8.28871  | 0.74427  | -0.32161 |
| H | 8.205    | -0.86215 | 0.37028  |
| H | 5.25979  | -0.36833 | 2.9537   |
| H | 4.91414  | -1.51683 | 1.63798  |
| H | 6.59111  | -1.24943 | 2.18053  |
| H | 7.15779  | 3.30304  | 1.51942  |
| H | 6.76077  | 2.63235  | -0.08602 |
| H | 5.45404  | 3.01844  | 1.06449  |

**Compound 1a:** Isomer 2S, 5R, 11R, 13R, 17S, 23R conformer 11

|   |          |         |         |
|---|----------|---------|---------|
| C | -2.81354 | 1.11231 | 1.56476 |
| C | -4.04488 | 1.24737 | 2.126   |
| C | -5.15354 | 1.87319 | 1.40653 |

|   |          |          |          |
|---|----------|----------|----------|
| C | -4.79224 | 2.37021  | 0.00584  |
| C | -3.69088 | 1.51766  | -0.61945 |
| O | -2.54825 | 1.43119  | 0.27612  |
| C | -1.63294 | 0.47469  | 2.23501  |
| C | -1.63085 | -1.04742 | 1.9332   |
| C | -0.33494 | -1.72979 | 2.36883  |
| C | -0.36014 | -3.26096 | 2.20681  |
| C | -0.74987 | -3.82247 | 0.81137  |
| C | 0.29806  | -3.48352 | -0.23817 |
| C | -0.95074 | -5.34183 | 0.87799  |
| O | 0.18262  | -2.20188 | -0.67355 |
| O | 1.15251  | -4.24615 | -0.6416  |
| C | 1.19034  | -1.75197 | -1.63264 |
| C | 0.6217   | -0.50889 | -2.32443 |
| C | 2.49027  | -1.47151 | -0.93492 |
| C | -0.66131 | -0.75119 | -3.11124 |
| C | -3.2027  | 2.04295  | -1.96749 |
| C | -1.90474 | 1.42966  | -2.53677 |
| C | -1.93406 | -0.11942 | -2.58331 |
| C | -0.65319 | -1.48659 | -4.22798 |
| C | -1.62658 | 2.03755  | -3.91975 |
| O | -6.26771 | 2.03381  | 1.88476  |
| O | -2.70725 | -1.69736 | 2.60404  |
| C | 3.55749  | -2.29719 | -0.76879 |
| O | 4.51573  | -1.61988 | -0.07364 |
| C | 3.97777  | -0.37953 | 0.16094  |
| N | 2.76985  | -0.25262 | -0.3261  |
| C | 4.82815  | 0.54084  | 0.88717  |
| C | 4.62689  | 1.85736  | 1.10677  |
| C | 3.3944   | 2.60055  | 0.62367  |
| C | 5.63215  | 2.65765  | 1.89081  |
| C | 2.26795  | 2.53268  | 1.669    |
| O | 3.78828  | 3.95122  | 0.36503  |
| C | 2.93508  | 4.64388  | -0.52126 |
| H | -4.20096 | 0.96455  | 3.16169  |
| H | -5.69038 | 2.36803  | -0.61936 |
| H | -4.4525  | 3.41293  | 0.08998  |
| H | -4.05985 | 0.48659  | -0.72492 |
| H | -1.67521 | 0.62187  | 3.31862  |
| H | -0.71323 | 0.92819  | 1.84896  |
| H | -1.73545 | -1.16564 | 0.84512  |

|   |          |          |          |
|---|----------|----------|----------|
| H | -0.15311 | -1.50398 | 3.42837  |
| H | 0.48904  | -1.28782 | 1.79816  |
| H | -1.08668 | -3.66684 | 2.91799  |
| H | 0.62084  | -3.6667  | 2.48772  |
| H | -1.69008 | -3.34955 | 0.5078   |
| H | -1.23882 | -5.74881 | -0.09656 |
| H | -1.73834 | -5.58397 | 1.59905  |
| H | -0.02839 | -5.84396 | 1.18525  |
| H | 1.33481  | -2.56396 | -2.34849 |
| H | 1.40605  | -0.13483 | -2.99366 |
| H | 0.4812   | 0.2614   | -1.5613  |
| H | -3.05857 | 3.12894  | -1.88733 |
| H | -4.0255  | 1.89447  | -2.68165 |
| H | -1.09224 | 1.72823  | -1.8632  |
| H | -2.1067  | -0.49725 | -1.56695 |
| H | -2.78287 | -0.44704 | -3.19923 |
| H | -1.56028 | -1.67252 | -4.79749 |
| H | 0.25813  | -1.93823 | -4.61518 |
| H | -0.67319 | 1.68839  | -4.32753 |
| H | -1.59336 | 3.13245  | -3.86987 |
| H | -2.41119 | 1.75987  | -4.63588 |
| H | -3.53347 | -1.27479 | 2.31534  |
| H | 3.76525  | -3.32095 | -1.03256 |
| H | 5.73189  | 0.07793  | 1.27508  |
| H | 3.03455  | 2.13821  | -0.30447 |
| H | 6.45104  | 2.02809  | 2.25071  |
| H | 6.04251  | 3.46402  | 1.27427  |
| H | 5.1609   | 3.14396  | 2.75481  |
| H | 1.39114  | 3.09619  | 1.33153  |
| H | 1.96428  | 1.49307  | 1.82231  |
| H | 2.5989   | 2.95413  | 2.62412  |
| H | 3.38632  | 5.62541  | -0.69073 |
| H | 2.84384  | 4.12202  | -1.48725 |
| H | 1.9247   | 4.79115  | -0.11103 |

**Compound 1a:** Isomer 2S, 5R, 11R, 13R, 17S, 23R conformer 12

|   |          |         |          |
|---|----------|---------|----------|
| C | -2.86076 | 1.05832 | 1.54703  |
| C | -4.07548 | 1.2589  | 2.1131   |
| C | -5.16813 | 1.89316 | 1.38392  |
| C | -4.8075  | 2.32877 | -0.03754 |

|   |          |          |          |
|---|----------|----------|----------|
| C | -3.72823 | 1.43478  | -0.64465 |
| O | -2.58529 | 1.34203  | 0.24887  |
| C | -1.68375 | 0.42704  | 2.23181  |
| C | -1.61508 | -1.09041 | 1.92952  |
| C | -0.28755 | -1.71744 | 2.37663  |
| C | -0.25457 | -3.25175 | 2.25031  |
| C | -0.61631 | -3.86083 | 0.8682   |
| C | 0.41963  | -3.50129 | -0.18657 |
| C | -0.7529  | -5.38538 | 0.96878  |
| O | 0.25923  | -2.23075 | -0.6371  |
| O | 1.29815  | -4.24055 | -0.58142 |
| C | 1.24433  | -1.76067 | -1.61048 |
| C | 0.62447  | -0.55203 | -2.31806 |
| C | 2.53604  | -1.42164 | -0.92436 |
| C | -0.65765 | -0.85409 | -3.08628 |
| C | -3.23836 | 1.92883  | -2.00546 |
| C | -1.9332  | 1.31846  | -2.55948 |
| C | -1.94094 | -0.23092 | -2.57336 |
| C | -0.63911 | -1.6299  | -4.17513 |
| C | -1.65938 | 1.90039  | -3.95466 |
| O | -6.27215 | 2.11202  | 1.86525  |
| O | -2.744   | -1.77277 | 2.47465  |
| C | 3.63864  | -2.20031 | -0.76274 |
| O | 4.57184  | -1.48023 | -0.07642 |
| C | 3.9828   | -0.26317 | 0.1577   |
| N | 2.76723  | -0.18987 | -0.32119 |
| C | 4.79767  | 0.69565  | 0.87483  |
| C | 4.54542  | 2.00523  | 1.08323  |
| C | 3.28484  | 2.69587  | 0.59447  |
| C | 5.51944  | 2.85053  | 1.85936  |
| C | 2.16256  | 2.59539  | 1.64173  |
| O | 3.62682  | 4.05769  | 0.322    |
| C | 2.74556  | 4.70951  | -0.56821 |
| H | -4.24581 | 0.97583  | 3.14529  |
| H | -5.7113  | 2.322    | -0.65469 |
| H | -4.44791 | 3.36752  | 0.00531  |
| H | -4.121   | 0.41102  | -0.72779 |
| H | -1.74789 | 0.58206  | 3.31592  |
| H | -0.76416 | 0.90817  | 1.87753  |
| H | -1.71401 | -1.22039 | 0.84856  |
| H | -0.10143 | -1.45969 | 3.43131  |

|   |          |          |          |
|---|----------|----------|----------|
| H | 0.52301  | -1.25898 | 1.79938  |
| H | -0.96898 | -3.67427 | 2.9657   |
| H | 0.73813  | -3.6143  | 2.54828  |
| H | -1.57485 | -3.43566 | 0.55204  |
| H | -1.02207 | -5.82397 | 0.0028   |
| H | -1.53218 | -5.64527 | 1.69283  |
| H | 0.18892  | -5.84254 | 1.28722  |
| H | 1.41483  | -2.57954 | -2.31252 |
| H | 1.38789  | -0.16116 | -3.00199 |
| H | 0.46335  | 0.22582  | -1.56703 |
| H | -3.1033  | 3.01773  | -1.95245 |
| H | -4.05805 | 1.75683  | -2.71795 |
| H | -1.12627 | 1.64202  | -1.89076 |
| H | -2.1119  | -0.58809 | -1.54935 |
| H | -2.78322 | -0.58455 | -3.18358 |
| H | -1.54511 | -1.85622 | -4.73155 |
| H | 0.27962  | -2.07567 | -4.55157 |
| H | -0.70048 | 1.55566  | -4.35359 |
| H | -1.6409  | 2.99647  | -3.92817 |
| H | -2.43866 | 1.59727  | -4.66627 |
| H | -2.68378 | -1.72064 | 3.44291  |
| H | 3.88862  | -3.21509 | -1.0248  |
| H | 5.71981  | 0.27201  | 1.26441  |
| H | 2.94208  | 2.21081  | -0.32851 |
| H | 6.36236  | 2.25614  | 2.22355  |
| H | 5.89783  | 3.66712  | 1.23586  |
| H | 5.0301   | 3.32532  | 2.71969  |
| H | 1.26461  | 3.12151  | 1.29975  |
| H | 1.89906  | 1.54635  | 1.80494  |
| H | 2.47811  | 3.03853  | 2.5923   |
| H | 3.15972  | 5.70526  | -0.74889 |
| H | 2.67074  | 4.17491  | -1.52856 |
| H | 1.73187  | 4.82321  | -0.15576 |

**Compound 1a:** Isomer 2S, 5R, 11R, 13R, 17S, 23R conformer 13

|   |          |          |          |
|---|----------|----------|----------|
| C | -2.99356 | -1.72242 | -1.32555 |
| C | -4.26873 | -1.74369 | -1.79086 |
| C | -5.41559 | -1.78886 | -0.89134 |
| C | -5.04397 | -1.88266 | 0.58922  |
| C | -3.73014 | -1.16218 | 0.88487  |

|   |          |          |          |
|---|----------|----------|----------|
| O | -2.67905 | -1.61576 | -0.01181 |
| C | -1.77211 | -1.75769 | -2.20137 |
| C | -1.44323 | -0.38718 | -2.85437 |
| C | -1.27513 | 0.73248  | -1.8241  |
| C | -1.00801 | 2.10695  | -2.45306 |
| C | -1.1328  | 3.3155   | -1.48638 |
| C | 0.00779  | 3.37874  | -0.47506 |
| C | -1.22242 | 4.63958  | -2.25386 |
| O | 0.02084  | 2.2883   | 0.33258  |
| O | 0.81115  | 4.28308  | -0.38119 |
| C | 1.09935  | 2.20597  | 1.31168  |
| C | 0.6704   | 1.17026  | 2.36013  |
| C | 2.38841  | 1.83565  | 0.63809  |
| C | -0.64487 | 1.49085  | 3.0556   |
| C | -3.24471 | -1.37818 | 2.31587  |
| C | -1.89435 | -0.74919 | 2.72219  |
| C | -1.89968 | 0.794    | 2.56569  |
| C | -0.67976 | 2.36453  | 4.06775  |
| C | -1.55997 | -1.17778 | 4.15914  |
| O | -6.57981 | -1.81114 | -1.2687  |
| O | -0.30161 | -0.51762 | -3.69858 |
| C | 3.4142   | 2.64696  | 0.26793  |
| O | 4.37623  | 1.87799  | -0.31679 |
| C | 3.88138  | 0.59865  | -0.28051 |
| N | 2.69666  | 0.53048  | 0.27067  |
| C | 4.73981  | -0.41613 | -0.85831 |
| C | 4.59133  | -1.75689 | -0.80422 |
| C | 3.43517  | -2.44961 | -0.09281 |
| C | 5.57923  | -2.6543  | -1.50397 |
| C | 2.30002  | -2.78466 | -1.06415 |
| O | 3.85234  | -3.6819  | 0.49519  |
| C | 4.57053  | -3.51575 | 1.70329  |
| H | -4.45318 | -1.79985 | -2.85843 |
| H | -5.85739 | -1.46589 | 1.19076  |
| H | -4.95274 | -2.94706 | 0.85092  |
| H | -3.8606  | -0.0903  | 0.67461  |
| H | -1.90482 | -2.4857  | -3.00756 |
| H | -0.91762 | -2.07733 | -1.59291 |
| H | -2.2608  | -0.13127 | -3.53904 |
| H | -0.47084 | 0.46275  | -1.13068 |
| H | -2.18962 | 0.7892   | -1.21987 |

|   |          |          |          |
|---|----------|----------|----------|
| H | -1.73938 | 2.2709   | -3.25603 |
| H | -0.02476 | 2.11925  | -2.93882 |
| H | -2.05435 | 3.17522  | -0.90255 |
| H | -1.31288 | 5.48958  | -1.57176 |
| H | -2.09357 | 4.63096  | -2.91735 |
| H | -0.32635 | 4.80005  | -2.86181 |
| H | 1.20031  | 3.19433  | 1.7666   |
| H | 1.48016  | 1.12218  | 3.09791  |
| H | 0.63583  | 0.19116  | 1.87364  |
| H | -3.189   | -2.46151 | 2.48889  |
| H | -4.03272 | -0.99964 | 2.98299  |
| H | -1.12765 | -1.16175 | 2.05423  |
| H | -2.04186 | 1.03875  | 1.50526  |
| H | -2.76335 | 1.20111  | 3.10955  |
| H | -1.60821 | 2.62189  | 4.57135  |
| H | 0.21824  | 2.86117  | 4.43016  |
| H | -0.57947 | -0.80736 | 4.47311  |
| H | -1.55487 | -2.27017 | 4.25121  |
| H | -2.30008 | -0.78578 | 4.86923  |
| H | 0.47081  | -0.65225 | -3.12449 |
| H | 3.58788  | 3.7096   | 0.31149  |
| H | 5.59284  | -0.00316 | -1.39138 |
| H | 3.03827  | -1.78629 | 0.68547  |
| H | 6.33773  | -2.0742  | -2.03722 |
| H | 6.08132  | -3.32317 | -0.79665 |
| H | 5.07167  | -3.30533 | -2.22736 |
| H | 1.50323  | -3.30919 | -0.52742 |
| H | 1.89384  | -1.86223 | -1.49089 |
| H | 2.64931  | -3.42987 | -1.87668 |
| H | 4.80488  | -4.51723 | 2.07385  |
| H | 5.51049  | -2.96106 | 1.55954  |
| H | 3.97036  | -2.98507 | 2.45867  |

**Compound 1a:** Isomer 2S, 5R, 11R, 13R, 17S, 23R conformer 16

|   |          |         |          |
|---|----------|---------|----------|
| C | -3.01764 | 1.78456 | 1.03523  |
| C | -4.12859 | 2.35154 | 1.57267  |
| C | -5.28349 | 2.69913 | 0.74194  |
| C | -5.11485 | 2.37747 | -0.7466  |
| C | -4.21571 | 1.15859 | -0.93882 |
| O | -2.95329 | 1.37224 | -0.2522  |

|   |          |          |          |
|---|----------|----------|----------|
| C | -1.75806 | 1.43517  | 1.77301  |
| C | -1.72921 | -0.08525 | 2.06846  |
| C | -0.3554  | -0.58209 | 2.51522  |
| C | -0.32924 | -2.08548 | 2.84433  |
| C | -0.76114 | -3.06615 | 1.71711  |
| C | 0.27933  | -3.15053 | 0.60817  |
| C | -1.02098 | -4.46532 | 2.29031  |
| O | 0.26993  | -2.05263 | -0.19466 |
| O | 1.04281  | -4.08034 | 0.44609  |
| C | 1.27815  | -2.03491 | -1.25491 |
| C | 0.84178  | -1.01501 | -2.31634 |
| C | 2.62296  | -1.6991  | -0.67837 |
| C | -0.55735 | -1.2142  | -2.88345 |
| C | -3.90937 | 0.82215  | -2.39661 |
| C | -3.0685  | -0.45039 | -2.68755 |
| C | -1.59149 | -0.2851  | -2.27911 |
| C | -0.7816  | -2.10132 | -3.85795 |
| C | -3.70098 | -1.7129  | -2.07858 |
| O | -6.289   | 3.24267  | 1.17652  |
| O | -2.66525 | -0.41802 | 3.09152  |
| C | 3.6473   | -2.53463 | -0.3623  |
| O | 4.66727  | -1.78524 | 0.14605  |
| C | 4.20626  | -0.49272 | 0.12207  |
| N | 2.99162  | -0.39864 | -0.35372 |
| C | 5.12528  | 0.50621  | 0.62969  |
| C | 4.99775  | 1.84943  | 0.5819   |
| C | 3.80534  | 2.56338  | -0.04388 |
| C | 6.05043  | 2.72941  | 1.205    |
| C | 2.75093  | 2.9221   | 1.00645  |
| O | 4.20465  | 3.78559  | -0.66683 |
| C | 4.82823  | 3.5999   | -1.92297 |
| H | -4.14063 | 2.64593  | 2.61655  |
| H | -6.10228 | 2.21462  | -1.18872 |
| H | -4.66982 | 3.25301  | -1.24167 |
| H | -4.68781 | 0.29819  | -0.44176 |
| H | -1.69071 | 1.99017  | 2.71358  |
| H | -0.89974 | 1.70157  | 1.1445   |
| H | -1.99683 | -0.59908 | 1.13382  |
| H | -0.05685 | -0.02822 | 3.41542  |
| H | 0.36952  | -0.34499 | 1.72916  |
| H | -1.00442 | -2.25943 | 3.68847  |



|   |          |          |          |
|---|----------|----------|----------|
| H | 0.67765  | -2.36249 | 3.18368  |
| H | -1.68717 | -2.68952 | 1.26772  |
| H | -1.32168 | -5.16831 | 1.50731  |
| H | -1.81807 | -4.41923 | 3.0395   |
| H | -0.11948 | -4.86624 | 2.76357  |
| H | 1.3089   | -3.04001 | -1.6812  |
| H | 1.58494  | -1.07926 | -3.12041 |
| H | 0.93689  | -0.01333 | -1.88465 |
| H | -3.42222 | 1.69275  | -2.85593 |
| H | -4.88178 | 0.71197  | -2.89597 |
| H | -3.09793 | -0.55716 | -3.78152 |
| H | -1.27099 | 0.74189  | -2.51534 |
| H | -1.50203 | -0.35349 | -1.19018 |
| H | -1.76496 | -2.2666  | -4.28751 |
| H | 0.02462  | -2.70426 | -4.27033 |
| H | -3.1585  | -2.61152 | -2.38565 |
| H | -4.74699 | -1.82701 | -2.38897 |
| H | -3.67769 | -1.68271 | -0.98238 |
| H | -3.53518 | -0.08243 | 2.81817  |
| H | 3.78806  | -3.60233 | -0.39935 |
| H | 6.00625  | 0.07824  | 1.10205  |
| H | 3.34028  | 1.90651  | -0.78913 |
| H | 6.83501  | 2.13649  | 1.68387  |
| H | 6.51228  | 3.38803  | 0.46142  |
| H | 5.60788  | 3.39075  | 1.96097  |
| H | 1.93064  | 3.46518  | 0.52617  |
| H | 2.35518  | 2.01243  | 1.46736  |
| H | 3.17259  | 3.56286  | 1.78804  |
| H | 5.0586   | 4.59457  | -2.31422 |
| H | 5.763    | 3.02317  | -1.84655 |
| H | 4.16244  | 3.08185  | -2.63079 |

**Compound 1a:** Isomer 2S, 5R, 11R, 13R, 17S, 23R conformer 21

|   |          |          |          |
|---|----------|----------|----------|
| C | -5.34662 | 0.66707  | 0.27596  |
| C | -5.75507 | 0.7912   | 1.56222  |
| C | -5.80335 | -0.35161 | 2.471    |
| C | -5.41017 | -1.67983 | 1.82467  |
| C | -4.35122 | -1.47853 | 0.74576  |
| O | -4.79673 | -0.47686 | -0.22212 |
| C | -5.47385 | 1.73834  | -0.7712  |

|   |          |          |          |
|---|----------|----------|----------|
| C | -4.15073 | 2.15617  | -1.45814 |
| C | -3.07683 | 2.63857  | -0.4694  |
| C | -1.87096 | 3.26296  | -1.18591 |
| C | -0.64413 | 3.49755  | -0.27826 |
| C | -0.165   | 2.18064  | 0.31765  |
| C | 0.49515  | 4.19912  | -1.04019 |
| O | 0.14695  | 1.29332  | -0.65471 |
| O | -0.09361 | 1.93247  | 1.50506  |
| C | 0.46193  | -0.06916 | -0.23024 |
| C | -0.02193 | -0.98262 | -1.36749 |
| C | 1.92633  | -0.1872  | 0.0733   |
| C | -0.2196  | -2.41934 | -0.92069 |
| C | -4.02975 | -2.7485  | -0.03913 |
| C | -2.79067 | -2.69182 | -0.95851 |
| C | -1.47788 | -2.72611 | -0.13172 |
| C | 0.68644  | -3.3626  | -1.19964 |
| C | -2.83476 | -3.83946 | -1.97698 |
| O | -6.18606 | -0.2822  | 3.63031  |
| O | -3.65988 | 1.11826  | -2.30362 |
| C | 2.55491  | 0.04987  | 1.25536  |
| O | 3.89518  | -0.14896 | 1.07018  |
| C | 4.02151  | -0.49921 | -0.24986 |
| N | 2.87444  | -0.53694 | -0.8764  |
| C | 5.31033  | -0.81428 | -0.83185 |
| C | 6.55387  | -0.68203 | -0.32313 |
| C | 6.87065  | -0.13574 | 1.06639  |
| C | 7.74282  | -1.12749 | -1.1377  |
| C | 7.05892  | -1.26064 | 2.08811  |
| O | 8.08273  | 0.6196   | 1.05713  |
| C | 7.93766  | 1.91221  | 0.49993  |
| H | -6.1457  | 1.73869  | 1.91574  |
| H | -5.04296 | -2.36061 | 2.59828  |
| H | -6.31212 | -2.13228 | 1.38714  |
| H | -3.44853 | -1.05953 | 1.21299  |
| H | -5.94811 | 2.61284  | -0.31474 |
| H | -6.14693 | 1.37256  | -1.5585  |
| H | -4.39655 | 2.9831   | -2.13696 |
| H | -2.75762 | 1.78265  | 0.1415   |
| H | -3.51687 | 3.36334  | 0.23002  |
| H | -2.16679 | 4.22853  | -1.61897 |
| H | -1.57878 | 2.61549  | -2.01872 |

|   |          |          |          |
|---|----------|----------|----------|
| H | -0.93355 | 4.11198  | 0.582    |
| H | 1.36006  | 4.37466  | -0.39108 |
| H | 0.15298  | 5.1695   | -1.41653 |
| H | 0.82328  | 3.59605  | -1.89248 |
| H | -0.10008 | -0.24603 | 0.68991  |
| H | 0.69736  | -0.93012 | -2.18841 |
| H | -0.96555 | -0.55759 | -1.73007 |
| H | -4.91923 | -2.99808 | -0.63209 |
| H | -3.90112 | -3.56564 | 0.68446  |
| H | -2.8256  | -1.74781 | -1.51907 |
| H | -1.5615  | -2.00912 | 0.69819  |
| H | -1.38795 | -3.71825 | 0.33028  |
| H | 0.55973  | -4.39089 | -0.86854 |
| H | 1.59137  | -3.13315 | -1.75543 |
| H | -1.94924 | -3.83216 | -2.61961 |
| H | -3.72186 | -3.7657  | -2.61643 |
| H | -2.86919 | -4.81165 | -1.46739 |
| H | -3.74202 | 0.29175  | -1.7983  |
| H | 2.23113  | 0.36033  | 2.23541  |
| H | 5.19819  | -1.21775 | -1.83492 |
| H | 6.05248  | 0.51086  | 1.40505  |
| H | 7.4315   | -1.56675 | -2.08968 |
| H | 8.42289  | -0.29347 | -1.34236 |
| H | 8.3345   | -1.87342 | -0.59171 |
| H | 7.31404  | -0.83038 | 3.06156  |
| H | 6.13805  | -1.8429  | 2.18675  |
| H | 7.8703   | -1.93166 | 1.78805  |
| H | 8.91313  | 2.40059  | 0.57212  |
| H | 7.6322   | 1.88142  | -0.55715 |
| H | 7.1967   | 2.50896  | 1.05466  |

**Compound 1a:** Isomer 2S, 5R, 11R, 13R, 17S, 23R conformer 22

|   |         |          |          |
|---|---------|----------|----------|
| C | 2.91005 | -1.90614 | 1.02439  |
| C | 4.14748 | -2.0041  | 1.57422  |
| C | 5.35854 | -1.83577 | 0.7791   |
| C | 5.09984 | -1.61516 | -0.71192 |
| C | 3.78819 | -0.86918 | -0.94844 |
| O | 2.68999 | -1.52469 | -0.25567 |
| C | 1.62748 | -2.15521 | 1.76924  |
| C | 1.20617 | -0.97354 | 2.68392  |

|   |          |          |          |
|---|----------|----------|----------|
| C | 1.04596  | 0.33443  | 1.91594  |
| C | 0.70945  | 1.53446  | 2.81291  |
| C | 0.89212  | 2.92646  | 2.14928  |
| C | -0.16696 | 3.2103   | 1.08912  |
| C | 0.8991   | 4.04943  | 3.19283  |
| O | -0.08668 | 2.3306   | 0.05956  |
| O | -0.9842  | 4.10548  | 1.13656  |
| C | -1.10044 | 2.43816  | -0.9829  |
| C | -0.57736 | 1.65014  | -2.19226 |
| C | -2.41413 | 1.91403  | -0.48414 |
| C | 0.76832  | 2.1308   | -2.71559 |
| C | 3.4143   | -0.775   | -2.42494 |
| C | 2.07351  | -0.09979 | -2.78543 |
| C | 2.00997  | 1.3702   | -2.29265 |
| C | 0.84027  | 3.19543  | -3.52216 |
| C | 1.85702  | -0.20462 | -4.30284 |
| O | 6.49145  | -1.92008 | 1.23485  |
| O | -0.05016 | -1.2588  | 3.29975  |
| C | -3.51029 | 2.6139   | -0.09053 |
| O | -4.4658  | 1.72388  | 0.29912  |
| C | -3.89245 | 0.48699  | 0.12927  |
| N | -2.67053 | 0.55688  | -0.33109 |
| C | -4.74142 | -0.63108 | 0.4926   |
| C | -4.49862 | -1.95235 | 0.36304  |
| C | -3.21063 | -2.52975 | -0.21057 |
| C | -5.52984 | -2.95264 | 0.81949  |
| C | -2.27814 | -3.04566 | 0.88821  |
| O | -3.48888 | -3.6425  | -1.06692 |
| C | -4.00757 | -3.26702 | -2.32828 |
| H | 4.2563   | -2.28554 | 2.6163   |
| H | 5.9408   | -1.065   | -1.14464 |
| H | 5.06353  | -2.59943 | -1.20165 |
| H | 3.86769  | 0.13253  | -0.50165 |
| H | 1.73688  | -3.05323 | 2.39033  |
| H | 0.82447  | -2.33767 | 1.04892  |
| H | 1.98081  | -0.84407 | 3.4583   |
| H | 0.27865  | 0.19766  | 1.14935  |
| H | 1.98744  | 0.53613  | 1.39054  |
| H | 1.37389  | 1.51768  | 3.68817  |
| H | -0.31002 | 1.43809  | 3.2038   |
| H | 1.85914  | 2.91683  | 1.62518  |

|   |          |          |          |
|---|----------|----------|----------|
| H | 1.0282   | 5.02843  | 2.72263  |
| H | 1.7157   | 3.89561  | 3.90634  |
| H | -0.04465 | 4.07371  | 3.74698  |
| H | -1.2035  | 3.49763  | -1.23069 |
| H | -1.33802 | 1.74366  | -2.97643 |
| H | -0.54367 | 0.59213  | -1.91595 |
| H | 3.41041  | -1.79427 | -2.83433 |
| H | 4.2333   | -0.24267 | -2.93008 |
| H | 1.2778   | -0.66614 | -2.28528 |
| H | 2.06356  | 1.37727  | -1.19649 |
| H | 2.89531  | 1.9051   | -2.66368 |
| H | 1.79044  | 3.56866  | -3.8961  |
| H | -0.04823 | 3.7396   | -3.83661 |
| H | 0.88742  | 0.20545  | -4.60035 |
| H | 1.90036  | -1.24886 | -4.63411 |
| H | 2.62917  | 0.35245  | -4.84984 |
| H | 0.05839  | -2.04092 | 3.86331  |
| H | -3.7434  | 3.66214  | 0.00083  |
| H | -5.68702 | -0.31542 | 0.92714  |
| H | -2.68681 | -1.7531  | -0.77981 |
| H | -6.41428 | -2.45832 | 1.23161  |
| H | -5.84001 | -3.60199 | -0.00628 |
| H | -5.11855 | -3.61703 | 1.59037  |
| H | -1.39644 | -3.49756 | 0.42141  |
| H | -1.953   | -2.23321 | 1.5449   |
| H | -2.76998 | -3.81643 | 1.49134  |
| H | -4.1404  | -4.18712 | -2.90407 |
| H | -4.97908 | -2.75536 | -2.24735 |
| H | -3.3145  | -2.60311 | -2.86826 |

**Compound 1a:** Isomer 2S, 5R, 11R, 13R, 17S, 23R conformer 29

|   |          |          |          |
|---|----------|----------|----------|
| C | -5.53223 | 0.55021  | -0.23423 |
| C | -6.17648 | 0.76053  | 0.93877  |
| C | -6.27878 | -0.27716 | 1.9606   |
| C | -5.66301 | -1.6172  | 1.5595   |
| C | -4.46662 | -1.44036 | 0.62839  |
| O | -4.82338 | -0.5825  | -0.50296 |
| C | -5.50887 | 1.51361  | -1.38876 |
| C | -4.09103 | 2.01296  | -1.76829 |
| C | -3.35485 | 2.64243  | -0.57625 |
| C | -1.98102 | 3.21729  | -0.95398 |

|   |          |          |          |
|---|----------|----------|----------|
| C | -1.00013 | 3.33732  | 0.24508  |
| C | -0.65898 | 1.9277   | 0.7064   |
| C | 0.2316   | 4.17873  | -0.1148  |
| O | 0.39312  | 1.41522  | 0.02809  |
| O | -1.29626 | 1.30296  | 1.53474  |
| C | 0.68672  | 0.00209  | 0.24508  |
| C | 0.06317  | -0.80365 | -0.91549 |
| C | 2.17214  | -0.14182 | 0.34021  |
| C | -0.13008 | -2.2609  | -0.54223 |
| C | -3.97055 | -2.76067 | 0.04188  |
| C | -2.65359 | -2.71487 | -0.763   |
| C | -1.42147 | -2.60018 | 0.17613  |
| C | 0.80434  | -3.17972 | -0.81023 |
| C | -2.54936 | -3.95035 | -1.66833 |
| O | -6.86055 | -0.12619 | 3.02591  |
| O | -3.32585 | 0.96738  | -2.36717 |
| C | 2.92675  | -0.3695  | 1.44681  |
| O | 4.23912  | -0.42352 | 1.06474  |
| C | 4.21837  | -0.21469 | -0.29124 |
| N | 3.00965  | -0.05166 | -0.76136 |
| C | 5.43445  | -0.21127 | -1.07884 |
| C | 6.72723  | -0.25097 | -0.6919  |
| C | 7.19855  | -0.31694 | 0.75837  |
| C | 7.81559  | -0.27287 | -1.736   |
| C | 7.49406  | -1.75572 | 1.19182  |
| O | 8.40537  | 0.42397  | 0.94208  |
| C | 8.20612  | 1.82413  | 0.99208  |
| H | -6.69361 | 1.69762  | 1.11125  |
| H | -5.3663  | -2.158   | 2.4631   |
| H | -6.44101 | -2.21345 | 1.06009  |
| H | -3.6672  | -0.90828 | 1.16306  |
| H | -6.15185 | 2.36545  | -1.14618 |
| H | -5.93234 | 1.01758  | -2.27207 |
| H | -4.21319 | 2.76497  | -2.55841 |
| H | -3.23613 | 1.87895  | 0.20085  |
| H | -3.98252 | 3.42884  | -0.13393 |
| H | -2.10088 | 4.21507  | -1.39654 |
| H | -1.52036 | 2.58431  | -1.72098 |
| H | -1.53095 | 3.79895  | 1.08616  |
| H | 0.93614  | 4.23839  | 0.72173  |
| H | -0.07748 | 5.19843  | -0.37038 |

|   |          |          |          |
|---|----------|----------|----------|
| H | 0.76242  | 3.75397  | -0.97133 |
| H | 0.22978  | -0.27894 | 1.19584  |
| H | 0.70625  | -0.69756 | -1.79353 |
| H | -0.89955 | -0.33902 | -1.15779 |
| H | -4.77529 | -3.15165 | -0.59443 |
| H | -3.85886 | -3.47362 | 0.87075  |
| H | -2.67831 | -1.83024 | -1.41364 |
| H | -1.61873 | -1.82843 | 0.93386  |
| H | -1.3124  | -3.55035 | 0.71607  |
| H | 0.68755  | -4.21808 | -0.5086  |
| H | 1.71992  | -2.92414 | -1.33749 |
| H | -1.60733 | -3.95477 | -2.22444 |
| H | -3.3726  | -3.97775 | -2.39136 |
| H | -2.59401 | -4.87383 | -1.07557 |
| H | -3.4847  | 0.1724   | -1.83026 |
| H | 2.71956  | -0.51489 | 2.49528  |
| H | 5.20944  | -0.17157 | -2.14147 |
| H | 6.42586  | 0.09538  | 1.41791  |
| H | 7.39776  | -0.28555 | -2.7466  |
| H | 8.47823  | 0.59421  | -1.64124 |
| H | 8.45505  | -1.15693 | -1.61703 |
| H | 7.85671  | -1.75818 | 2.22441  |
| H | 6.58783  | -2.36563 | 1.13115  |
| H | 8.26513  | -2.20555 | 0.55807  |
| H | 9.18545  | 2.27828  | 1.16482  |
| H | 7.78929  | 2.22226  | 0.05435  |
| H | 7.5308   | 2.10549  | 1.8153   |

**Compound 1a:** Isomer 2S, 5R, 11R, 13R, 17S, 23R conformer 31

|   |          |          |          |
|---|----------|----------|----------|
| C | -3.08183 | 2.18749  | -0.30501 |
| C | -4.13593 | 2.97274  | 0.04557  |
| C | -5.4724  | 2.75888  | -0.50705 |
| C | -5.55898 | 1.61076  | -1.51389 |
| C | -4.53721 | 0.51995  | -1.20373 |
| O | -3.20484 | 1.09104  | -1.08883 |
| C | -1.68775 | 2.34198  | 0.2267   |
| C | -1.54022 | 1.52617  | 1.53882  |
| C | -0.09238 | 1.46015  | 2.02154  |
| C | 0.07733  | 0.7263   | 3.3647   |
| C | -0.50403 | -0.71198 | 3.46536  |

|   |          |          |          |
|---|----------|----------|----------|
| C | 0.21782  | -1.65915 | 2.51939  |
| C | -0.41033 | -1.2342  | 4.90449  |
| O | -0.25656 | -1.55712 | 1.24909  |
| O | 1.12426  | -2.40373 | 2.83032  |
| C | 0.44821  | -2.32685 | 0.23101  |
| C | -0.47077 | -2.39315 | -0.99437 |
| C | 1.76023  | -1.67338 | -0.09054 |
| C | -1.81768 | -3.06278 | -0.74715 |
| C | -4.49485 | -0.58969 | -2.25367 |
| C | -3.28748 | -1.55137 | -2.21857 |
| C | -3.04976 | -2.18339 | -0.8235  |
| C | -1.89884 | -4.37141 | -0.48523 |
| C | -3.46483 | -2.62245 | -3.30531 |
| O | -6.43959 | 3.45615  | -0.2336  |
| O | -2.31694 | 2.0996   | 2.58735  |
| C | 3.01405  | -2.07076 | 0.24659  |
| O | 3.90033  | -1.16603 | -0.27084 |
| C | 3.12278  | -0.22839 | -0.89986 |
| N | 1.84446  | -0.49571 | -0.82202 |
| C | 3.70648  | 0.9057   | -1.58682 |
| C | 4.9842   | 1.34074  | -1.62246 |
| C | 6.15078  | 0.67286  | -0.89917 |
| C | 5.33746  | 2.54767  | -2.45522 |
| C | 6.92029  | -0.27381 | -1.82511 |
| O | 7.088    | 1.64284  | -0.43116 |
| C | 6.66314  | 2.32156  | 0.73591  |
| H | -3.97815 | 3.83409  | 0.68602  |
| H | -6.57553 | 1.20563  | -1.51173 |
| H | -5.37051 | 2.02093  | -2.51688 |
| H | -4.76124 | 0.0973   | -0.21297 |
| H | -1.46809 | 3.39363  | 0.43607  |
| H | -0.97475 | 1.96712  | -0.51584 |
| H | -1.88383 | 0.50335  | 1.32849  |
| H | 0.28351  | 2.48497  | 2.14523  |
| H | 0.50736  | 0.98939  | 1.23538  |
| H | -0.41462 | 1.31708  | 4.14427  |
| H | 1.14501  | 0.68849  | 3.61895  |
| H | -1.55622 | -0.67508 | 3.16277  |
| H | -0.83907 | -2.2378  | 4.99314  |
| H | -0.95372 | -0.5673  | 5.58193  |
| H | 0.63262  | -1.29061 | 5.23048  |



|   |          |          |          |
|---|----------|----------|----------|
| H | 0.63144  | -3.32321 | 0.64008  |
| H | 0.08131  | -2.93533 | -1.77209 |
| H | -0.59815 | -1.3723  | -1.36497 |
| H | -4.52988 | -0.12856 | -3.25002 |
| H | -5.4277  | -1.16205 | -2.14775 |
| H | -2.40273 | -0.9543  | -2.47012 |
| H | -2.93818 | -1.37738 | -0.08664 |
| H | -3.93371 | -2.76845 | -0.53467 |
| H | -2.85239 | -4.86026 | -0.30235 |
| H | -1.01624 | -5.0063  | -0.4364  |
| H | -2.59498 | -3.28389 | -3.36024 |
| H | -3.60617 | -2.16449 | -4.29143 |
| H | -4.34255 | -3.24904 | -3.09884 |
| H | -3.24175 | 2.12561  | 2.28966  |
| H | 3.42304  | -2.88611 | 0.82064  |
| H | 2.95325  | 1.45423  | -2.14657 |
| H | 5.77731  | 0.09862  | -0.04326 |
| H | 4.4671   | 2.92718  | -2.99786 |
| H | 5.74418  | 3.35442  | -1.83579 |
| H | 6.11952  | 2.30337  | -3.18531 |
| H | 7.76614  | -0.7069  | -1.28232 |
| H | 6.26859  | -1.08135 | -2.17175 |
| H | 7.31128  | 0.26204  | -2.69604 |
| H | 7.46669  | 3.00867  | 1.01386  |
| H | 5.74082  | 2.89992  | 0.57252  |
| H | 6.48736  | 1.62128  | 1.56739  |

**Compound 1a:** Isomer 2S, 5R, 11R, 13R, 17S, 23R conformer 34

|   |          |          |          |
|---|----------|----------|----------|
| C | -2.95152 | -1.90326 | -1.06289 |
| C | -4.10899 | -1.95372 | -1.77485 |
| C | -5.4062  | -1.70198 | -1.15624 |
| C | -5.33485 | -1.4191  | 0.34518  |
| C | -4.02939 | -0.71285 | 0.69851  |
| O | -2.89064 | -1.47446 | 0.21572  |
| C | -1.61813 | -2.332   | -1.60931 |
| C | -0.53281 | -1.23449 | -1.72373 |
| C | -1.08964 | 0.11019  | -2.22403 |
| C | -0.0347  | 1.04297  | -2.85373 |
| C | -0.33235 | 2.56003  | -2.66954 |
| C | 0.34802  | 3.0717   | -1.40305 |

|   |          |          |          |
|---|----------|----------|----------|
| C | 0.09781  | 3.40404  | -3.87412 |
| O | 0.10046  | 2.25227  | -0.34586 |
| O | 1.05931  | 4.04963  | -1.33131 |
| C | 0.94566  | 2.42497  | 0.82418  |
| C | 0.27421  | 1.67026  | 1.98118  |
| C | 2.31751  | 1.90143  | 0.51784  |
| C | -1.05067 | 2.27582  | 2.42559  |
| C | -3.82878 | -0.49918 | 2.19438  |
| C | -2.49504 | 0.14779  | 2.62396  |
| C | -2.32181 | 1.56371  | 2.01541  |
| C | -1.07439 | 3.3993   | 3.15108  |
| C | -2.41581 | 0.17068  | 4.15756  |
| O | -6.47192 | -1.76348 | -1.75605 |
| O | 0.08848  | -1.12367 | -0.44747 |
| C | 3.49775  | 2.56967  | 0.50959  |
| O | 4.48642  | 1.68475  | 0.19378  |
| C | 3.8542   | 0.48307  | 0.01163  |
| N | 2.55703  | 0.57073  | 0.18018  |
| C | 4.74715  | -0.61419 | -0.31425 |
| C | 4.53244  | -1.94565 | -0.25567 |
| C | 3.22797  | -2.5937  | 0.19145  |
| C | 5.64541  | -2.89349 | -0.62495 |
| C | 2.54252  | -3.36041 | -0.94002 |
| O | 3.48317  | -3.54654 | 1.22923  |
| C | 3.73358  | -2.95915 | 2.49302  |
| H | -4.09454 | -2.27209 | -2.81123 |
| H | -6.19831 | -0.81503 | 0.64004  |
| H | -5.40089 | -2.37683 | 0.88196  |
| H | -3.9994  | 0.24669  | 0.16178  |
| H | -1.78838 | -2.76486 | -2.60012 |
| H | -1.20844 | -3.1218  | -0.96759 |
| H | 0.20026  | -1.61171 | -2.45818 |
| H | -1.55925 | 0.59424  | -1.36269 |
| H | -1.88597 | -0.06918 | -2.95809 |
| H | 0.03213  | 0.83389  | -3.92847 |
| H | 0.96154  | 0.82455  | -2.44754 |
| H | -1.41577 | 2.67951  | -2.52361 |
| H | -0.08917 | 4.46712  | -3.70092 |
| H | -0.4541  | 3.09161  | -4.76698 |
| H | 1.16854  | 3.28627  | -4.07257 |
| H | 1.01102  | 3.49269  | 1.04723  |

|   |          |          |          |
|---|----------|----------|----------|
| H | 0.98519  | 1.67916  | 2.81586  |
| H | 0.1511   | 0.62749  | 1.67439  |
| H | -3.92152 | -1.47462 | 2.6908   |
| H | -4.66763 | 0.11408  | 2.55439  |
| H | -1.68961 | -0.49048 | 2.24118  |
| H | -2.32921 | 1.47986  | 0.92082  |
| H | -3.18575 | 2.18125  | 2.29788  |
| H | -2.00814 | 3.85849  | 3.46561  |
| H | -0.1618  | 3.90797  | 3.45641  |
| H | -1.46202 | 0.57809  | 4.50635  |
| H | -2.52435 | -0.8393  | 4.57011  |
| H | -3.2134  | 0.79326  | 4.58477  |
| H | 0.83868  | -0.49841 | -0.48113 |
| H | 3.78699  | 3.596    | 0.66782  |
| H | 5.73394  | -0.26435 | -0.60968 |
| H | 2.53889  | -1.82804 | 0.56323  |
| H | 6.58815  | -2.36599 | -0.79576 |
| H | 5.78883  | -3.63979 | 0.16326  |
| H | 5.39913  | -3.44996 | -1.53894 |
| H | 1.58463  | -3.7462  | -0.58271 |
| H | 2.35698  | -2.70299 | -1.79521 |
| H | 3.15793  | -4.20349 | -1.26944 |
| H | 3.8689   | -3.78077 | 3.20149  |
| H | 4.64132  | -2.33678 | 2.49248  |
| H | 2.88703  | -2.33741 | 2.82221  |

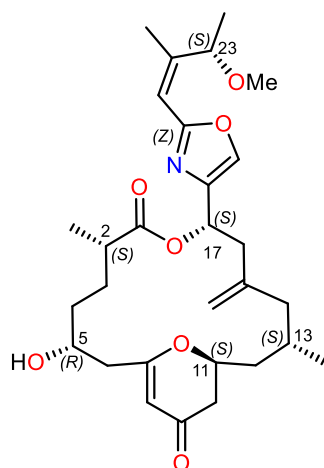

**Table 4.** Calculated DFT energies of the **1b**-(2S5R11S13S17S23S) diastereoisomer.

| Conformers <b>1b</b> | OPLS2008 Force Field | B3LYP/6-31+G(d,p) | $\Delta$ (DFT Energy) | % Population |
|----------------------|----------------------|-------------------|-----------------------|--------------|
| <b>1b4</b>           | 1.495960803          | -1710.456029      | 0                     | 19.95        |
| <b>1b3</b>           | 1.322944551          | -1710.455954      | 0.0470632             | 18.43        |
| <b>1b1</b>           | 0                    | -1710.455935      | 0.05898588            | 18.06        |
| <b>1b18</b>          | 2.732791587          | -1710.455096      | 0.58546626            | 7.42         |
| <b>1b8</b>           | 1.785062141          | -1710.454916      | 0.69841795            | 6.13         |
| <b>1b2</b>           | 0.431716061          | -1710.454814      | 0.76242391            | 5.50         |
| <b>1b22</b>          | 3.070650096          | -1710.454601      | 0.89608341            | 4.39         |
| <b>1b17</b>          | 2.713217017          | -1710.454415      | 1.01280016            | 3.60         |
| <b>1b21</b>          | 2.994502868          | -1710.454414      | 1.01342767            | 3.60         |
| <b>1b27</b>          | 3.242160612          | -1710.453776      | 1.41377866            | 1.83         |
| <b>1b12</b>          | 2.148183556          | -1710.453697      | 1.4633519             | 1.68         |
| <b>1b10</b>          | 2.04292543           | -1710.453516      | 1.5769311             | 1.39         |
| <b>1b11</b>          | 2.075262906          | -1710.453341      | 1.68674524            | 1.15         |
| <b>1b6</b>           | 1.530640535          | -1710.453309      | 1.70682554            | 1.12         |
| <b>1b19</b>          | 2.852868069          | -1710.453155      | 1.80346199            | 0.95         |
| <b>1b56</b>          | 4.674689293          | -1710.452849      | 1.99547986            | 0.68         |
| <b>1b42</b>          | 4.111089866          | -1710.45258       | 2.16427989            | 0.51         |
| <b>1b32</b>          | 3.536567878          | -1710.452455      | 2.24271856            | 0.45         |
| <b>1b37</b>          | 3.785994264          | -1710.452396      | 2.27974162            | 0.42         |
| <b>1b55</b>          | 4.660994264          | -1710.45214       | 2.44038402            | 0.32         |
| <b>1b47</b>          | 4.423064054          | -1710.452031      | 2.50878255            | 0.29         |
| <b>1b23</b>          | 3.084799235          | -1710.451875      | 2.60667401            | 0.24         |
| <b>1b46</b>          | 4.35250956           | -1710.451748      | 2.6863677             | 0.21         |
| <b>1b52</b>          | 4.594144359          | -1710.451529      | 2.82379226            | 0.17         |
| <b>1b15</b>          | 2.470960803          | -1710.451487      | 2.85014765            | 0.16         |
| <b>1b28</b>          | 3.356046845          | -1710.451399      | 2.90536848            | 0.15         |
| <b>1b5</b>           | 1.508819312          | -1710.451364      | 2.92733131            | 0.14         |
| <b>1b63</b>          | 4.930760038          | -1710.451278      | 2.98129712            | 0.13         |
| <b>1b16</b>          | 2.509703633          | -1710.451185      | 3.03965549            | 0.12         |
| <b>1b9</b>           | 1.942853728          | -1710.451176      | 3.04530307            | 0.12         |
| <b>1b57</b>          | 4.736304971          | -1710.451132      | 3.07291349            | 0.11         |
| <b>1b13</b>          | 2.355066922          | -1710.451021      | 3.14256703            | 0.10         |

32 conformers counting for the 99.54% of the DFT conformational population

DFT COORDINATES FOR CONFORMATIONAL SEARCH OF 1b

(2S\*, 5R\*, 11S\*, 13S\*, 17S\*, 23S\*)

**Compound 1b:** Isomer 2S, 5R, 11S, 13S, 17S, 23S conformer 1

|   |          |          |          |
|---|----------|----------|----------|
| C | -2.7622  | 1.47339  | 0.93925  |
| C | -3.73055 | 2.32989  | 1.35375  |
| C | -5.02562 | 2.40471  | 0.67885  |
| C | -5.20834 | 1.39109  | -0.45396 |
| C | -3.88435 | 1.08016  | -1.14898 |
| O | -2.87568 | 0.70807  | -0.17165 |
| C | -1.47093 | 1.19493  | 1.65369  |
| C | -1.42775 | -0.25262 | 2.19889  |
| C | -0.02543 | -0.66238 | 2.64639  |
| C | 0.07092  | -2.12399 | 3.1162   |
| C | -0.28689 | -3.21873 | 2.07283  |
| C | 0.71631  | -3.24607 | 0.92742  |
| C | -0.35465 | -4.59943 | 2.73863  |
| O | 0.45508  | -2.28699 | 0.00019  |
| O | 1.64775  | -4.01942 | 0.83824  |
| C | 1.37386  | -2.22347 | -1.13629 |
| C | 0.66047  | -1.48268 | -2.27808 |
| C | 2.6547   | -1.55016 | -0.73799 |
| C | -0.66458 | -2.10069 | -2.69273 |
| C | -3.99053 | -0.04051 | -2.18409 |
| C | -2.68874 | -0.5075  | -2.88788 |
| C | -1.9234  | -1.56028 | -2.03703 |
| C | -0.71036 | -3.07892 | -3.6041  |
| C | -1.81353 | 0.67013  | -3.34197 |
| O | -5.92419 | 3.16194  | 1.01863  |
| O | -2.29582 | -0.40011 | 3.32177  |
| C | 3.83859  | -2.12124 | -0.39136 |
| O | 4.72965  | -1.12495 | -0.12173 |
| C | 4.03033  | 0.04058  | -0.31204 |
| N | 2.7934   | -0.16766 | -0.684   |
| C | 4.78523  | 1.25905  | -0.09841 |
| C | 4.32864  | 2.52954  | -0.09821 |
| C | 2.87008  | 2.90304  | -0.33419 |

|   |          |          |          |
|---|----------|----------|----------|
| C | 5.28751  | 3.67516  | 0.09831  |
| C | 2.60639  | 3.23188  | -1.80586 |
| O | 2.50338  | 4.05748  | 0.42331  |
| C | 2.27764  | 3.78636  | 1.79282  |
| H | -3.57203 | 2.94733  | 2.23092  |
| H | -5.62901 | 0.47081  | -0.02217 |
| H | -5.94053 | 1.78093  | -1.1673  |
| H | -3.51118 | 1.99887  | -1.62362 |
| H | -0.6464  | 1.33217  | 0.94258  |
| H | -1.33922 | 1.89646  | 2.48349  |
| H | -1.7494  | -0.917   | 1.3857   |
| H | 0.27583  | -0.01042 | 3.47734  |
| H | 0.66883  | -0.47768 | 1.81985  |
| H | -0.60504 | -2.25895 | 3.96748  |
| H | 1.08723  | -2.31616 | 3.48477  |
| H | -1.2658  | -2.98057 | 1.6421   |
| H | -0.6248  | -5.3772  | 2.01707  |
| H | -1.10465 | -4.59454 | 3.53642  |
| H | 0.61327  | -4.87154 | 3.17     |
| H | 1.58677  | -3.25403 | -1.4293  |
| H | 1.35966  | -1.48277 | -3.12304 |
| H | 0.53018  | -0.43819 | -1.97998 |
| H | -4.47836 | -0.90545 | -1.71446 |
| H | -4.68877 | 0.32861  | -2.94782 |
| H | -3.01372 | -1.03274 | -3.79755 |
| H | -1.67102 | -1.1263  | -1.06818 |
| H | -2.61539 | -2.39015 | -1.84213 |
| H | -1.64753 | -3.55177 | -3.88975 |
| H | 0.18507  | -3.44936 | -4.09883 |
| H | -2.39704 | 1.39116  | -3.92795 |
| H | -1.37557 | 1.20439  | -2.49098 |
| H | -0.99285 | 0.32048  | -3.97617 |
| H | -3.18635 | -0.12551 | 3.0493   |
| H | 4.17923  | -3.13678 | -0.27384 |
| H | 5.8451   | 1.08188  | 0.06767  |
| H | 2.23012  | 2.0586   | -0.04904 |
| H | 6.3189   | 3.32212  | 0.18781  |
| H | 5.23444  | 4.37651  | -0.74425 |
| H | 5.03794  | 4.25825  | 0.99144  |

|   |         |         |          |
|---|---------|---------|----------|
| H | 3.23996 | 4.05773 | -2.14608 |
| H | 1.56069 | 3.53068 | -1.93    |
| H | 2.8009  | 2.35343 | -2.42758 |
| H | 1.47308 | 3.04655 | 1.93001  |
| H | 3.17823 | 3.40964 | 2.30185  |
| H | 1.977   | 4.72863 | 2.25886  |

**Compound 1b:** Isomer 2S, 5R, 11S, 13S, 17S, 23S conformer 2

|   |          |          |          |
|---|----------|----------|----------|
| C | 1.93844  | -2.17962 | 0.71187  |
| C | 3.01649  | -2.88212 | 1.15156  |
| C | 4.0314   | -3.37844 | 0.22732  |
| C | 3.69727  | -3.15818 | -1.25017 |
| C | 2.90355  | -1.87012 | -1.48395 |
| O | 1.7672   | -1.79169 | -0.5719  |
| C | 0.83847  | -1.65717 | 1.59021  |
| C | 1.16278  | -0.22159 | 2.07575  |
| C | -0.05366 | 0.47944  | 2.67874  |
| C | 0.23884  | 1.89811  | 3.19935  |
| C | 0.88708  | 2.89804  | 2.20256  |
| C | -0.01915 | 3.16984  | 1.00869  |
| C | 1.22647  | 4.2173   | 2.90902  |
| O | 0.11553  | 2.21778  | 0.0484   |
| O | -0.78149 | 4.10906  | 0.90949  |
| C | -0.73956 | 2.34823  | -1.13015 |
| C | -0.09874 | 1.49724  | -2.23186 |
| C | -2.14399 | 1.92085  | -0.81833 |
| C | 1.22869  | 2.00968  | -2.78459 |
| C | 3.76066  | -0.60021 | -1.36758 |
| C | 2.99572  | 0.73718  | -1.4408  |
| C | 2.36105  | 1.00313  | -2.83138 |
| C | 1.37122  | 3.25583  | -3.24778 |
| C | 3.91258  | 1.89861  | -1.03268 |
| O | 5.03661  | -3.98151 | 0.57819  |
| O | 2.19245  | -0.23842 | 3.06221  |
| C | -3.21945 | 2.70775  | -0.55029 |
| O | -4.30396 | 1.90152  | -0.37193 |
| C | -3.82913 | 0.62391  | -0.5339  |
| N | -2.54916 | 0.59037  | -0.80458 |

|   |          |          |          |
|---|----------|----------|----------|
| C | -4.82276 | -0.425   | -0.41885 |
| C | -4.62004 | -1.75849 | -0.3672  |
| C | -3.24039 | -2.40427 | -0.40205 |
| C | -5.79631 | -2.69881 | -0.30899 |
| C | -2.8463  | -2.82147 | -1.82068 |
| O | -3.20284 | -3.58297 | 0.40453  |
| C | -3.14766 | -3.31877 | 1.79309  |
| H | 3.09731  | -3.15007 | 2.19972  |
| H | 4.62337  | -3.1553  | -1.83243 |
| H | 3.10591  | -4.02341 | -1.58097 |
| H | 2.42481  | -1.90489 | -2.46587 |
| H | -0.09102 | -1.64661 | 1.01029  |
| H | 0.70517  | -2.30333 | 2.4637   |
| H | 1.48895  | 0.35537  | 1.20242  |
| H | -0.43129 | -0.1225  | 3.51644  |
| H | -0.84105 | 0.50157  | 1.91683  |
| H | 0.92192  | 1.81944  | 4.05156  |
| H | -0.69374 | 2.33788  | 3.57696  |
| H | 1.80954  | 2.44727  | 1.82091  |
| H | 1.72388  | 4.91703  | 2.2294   |
| H | 1.89418  | 4.02859  | 3.75617  |
| H | 0.31925  | 4.70386  | 3.27934  |
| H | -0.7509  | 3.4058   | -1.40211 |
| H | -0.82554 | 1.43029  | -3.052   |
| H | 0.00965  | 0.47847  | -1.84711 |
| H | 4.31656  | -0.6353  | -0.42118 |
| H | 4.5175   | -0.64557 | -2.16415 |
| H | 2.17935  | 0.68737  | -0.7139  |
| H | 3.14165  | 1.3449   | -3.52365 |
| H | 1.96638  | 0.0645   | -3.24487 |
| H | 2.31004  | 3.60053  | -3.67347 |
| H | 0.56072  | 3.98124  | -3.22906 |
| H | 4.28199  | 1.77259  | -0.00783 |
| H | 4.78612  | 1.96482  | -1.69481 |
| H | 3.37847  | 2.85266  | -1.08513 |
| H | 2.97507  | -0.65243 | 2.66194  |
| H | -3.36685 | 3.76946  | -0.43873 |
| H | -5.84185 | -0.04709 | -0.38599 |
| H | -2.49647 | -1.68515 | -0.03604 |



|   |          |          |          |
|---|----------|----------|----------|
| H | -6.74467 | -2.15578 | -0.35456 |
| H | -5.76586 | -3.41062 | -1.1439  |
| H | -5.78236 | -3.30408 | 0.60377  |
| H | -3.57115 | -3.52673 | -2.24062 |
| H | -1.8671  | -3.30986 | -1.79592 |
| H | -2.78716 | -1.94126 | -2.46687 |
| H | -2.2583  | -2.72509 | 2.05611  |
| H | -4.03684 | -2.7802  | 2.15524  |
| H | -3.09102 | -4.2864  | 2.29892  |

**Compound 1b:** Isomer 2S, 5R, 11S, 13S, 17S, 23S conformer 3

|   |          |          |          |
|---|----------|----------|----------|
| C | 1.68675  | 2.21305  | -0.99075 |
| C | 2.69087  | 3.02325  | -1.41999 |
| C | 3.49482  | 3.80213  | -0.48325 |
| C | 3.01475  | 3.72926  | 0.96837  |
| C | 2.40341  | 2.36925  | 1.31492  |
| O | 1.41745  | 1.97669  | 0.3126   |
| C | 0.79836  | 1.3983   | -1.88652 |
| C | 1.40954  | -0.00518 | -2.13165 |
| C | 0.40117  | -0.98122 | -2.73546 |
| C | 0.96338  | -2.3944  | -2.96993 |
| C | 1.57245  | -3.12015 | -1.73822 |
| C | 0.53189  | -3.31819 | -0.64364 |
| C | 2.16486  | -4.47497 | -2.14825 |
| O | 0.43643  | -2.23102 | 0.1623   |
| O | -0.14914 | -4.31391 | -0.50197 |
| C | -0.56378 | -2.28385 | 1.23112  |
| C | -0.15383 | -1.2261  | 2.25864  |
| C | -1.94103 | -2.04669 | 0.67727  |
| C | 1.14825  | -1.49312 | 3.00782  |
| C | 3.45008  | 1.25743  | 1.48613  |
| C | 2.8898   | -0.16528 | 1.68871  |
| C | 2.13724  | -0.34465 | 3.03499  |
| C | 1.38657  | -2.64719 | 3.6393   |
| C | 4.0101   | -1.2059  | 1.55308  |
| O | 4.43306  | 4.51294  | -0.81746 |
| O | 2.52582  | 0.07018  | -3.0151  |
| C | -2.818   | -2.96007 | 0.1793   |

|   |          |          |          |
|---|----------|----------|----------|
| O | -3.95076 | -2.30151 | -0.19611 |
| C | -3.71103 | -0.98159 | 0.0943   |
| N | -2.52751 | -0.7869  | 0.61702  |
| C | -4.80485 | -0.07747 | -0.19925 |
| C | -4.83825 | 1.26526  | -0.06279 |
| C | -3.67076 | 2.093    | 0.4616   |
| C | -6.10156 | 2.02236  | -0.38205 |
| C | -3.77056 | 2.29868  | 1.97574  |
| O | -3.64932 | 3.39189  | -0.13249 |
| C | -3.12758 | 3.40524  | -1.44652 |
| H | 2.86021  | 3.15916  | -2.48295 |
| H | 3.8496   | 3.96148  | 1.63605  |
| H | 2.26164  | 4.51867  | 1.10032  |
| H | 1.80338  | 2.45507  | 2.22429  |
| H | -0.17721 | 1.28968  | -1.39952 |
| H | 0.66173  | 1.89656  | -2.85161 |
| H | 1.72701  | -0.39822 | -1.15844 |
| H | 0.05532  | -0.5817  | -3.69821 |
| H | -0.46951 | -1.02083 | -2.07154 |
| H | 1.75374  | -2.33498 | -3.72572 |
| H | 0.1691   | -3.02747 | -3.38682 |
| H | 2.36831  | -2.48901 | -1.32867 |
| H | 2.63811  | -4.97692 | -1.29783 |
| H | 2.92165  | -4.33417 | -2.92706 |
| H | 1.38526  | -5.13885 | -2.53335 |
| H | -0.52089 | -3.28984 | 1.65336  |
| H | -0.97556 | -1.13859 | 2.98123  |
| H | -0.10978 | -0.26132 | 1.74407  |
| H | 4.10851  | 1.25375  | 0.60729  |
| H | 4.08545  | 1.53813  | 2.33871  |
| H | 2.169    | -0.34959 | 0.88634  |
| H | 2.86857  | -0.4929  | 3.84019  |
| H | 1.5865   | 0.57442  | 3.27963  |
| H | 2.30394  | -2.80917 | 4.19941  |
| H | 0.67933  | -3.47374 | 3.63127  |
| H | 4.47655  | -1.16102 | 0.56151  |
| H | 4.79877  | -1.03931 | 2.29878  |
| H | 3.61963  | -2.21848 | 1.69752  |
| H | 3.18556  | 0.65419  | -2.60564 |

|   |          |          |          |
|---|----------|----------|----------|
| H | -2.78338 | -4.02449 | 0.01697  |
| H | -5.69538 | -0.58989 | -0.55508 |
| H | -2.7287  | 1.5736   | 0.24578  |
| H | -6.91304 | 1.34445  | -0.66213 |
| H | -6.42848 | 2.61647  | 0.48075  |
| H | -5.94574 | 2.7365   | -1.19811 |
| H | -4.70863 | 2.79539  | 2.24512  |
| H | -2.94098 | 2.92872  | 2.31147  |
| H | -3.71652 | 1.33552  | 2.49085  |
| H | -2.08948 | 3.03815  | -1.47123 |
| H | -3.72381 | 2.79522  | -2.14275 |
| H | -3.14395 | 4.44456  | -1.78575 |

**Compound 1b:** Isomer 2S, 5R, 11S, 13S, 17S, 23S conformer 4

|   |          |          |          |
|---|----------|----------|----------|
| C | 2.13043  | -2.14392 | 0.39905  |
| C | 2.49396  | -3.38098 | -0.02555 |
| C | 3.56162  | -3.56701 | -1.00781 |
| C | 4.25772  | -2.27395 | -1.44624 |
| C | 3.30316  | -1.08367 | -1.40771 |
| O | 2.64889  | -1.00477 | -0.11344 |
| C | 1.15591  | -1.82941 | 1.49586  |
| C | 1.85895  | -1.19417 | 2.72274  |
| C | 0.89864  | -0.47453 | 3.67543  |
| C | 0.1197   | 0.70511  | 3.06633  |
| C | 0.99338  | 1.87865  | 2.53278  |
| C | 0.17412  | 2.665    | 1.51865  |
| C | 1.50794  | 2.78846  | 3.6519   |
| O | 0.13331  | 2.00309  | 0.33274  |
| O | -0.39963 | 3.71328  | 1.72473  |
| C | -0.7763  | 2.52016  | -0.68717 |
| C | -0.31672 | 1.93777  | -2.0311  |
| C | -2.18251 | 2.12886  | -0.3411  |
| C | 0.94582  | 2.54992  | -2.63273 |
| C | 3.97068  | 0.27132  | -1.62959 |
| C | 3.02386  | 1.48888  | -1.52922 |
| C | 2.15438  | 1.64948  | -2.80497 |
| C | 0.95544  | 3.82249  | -3.04581 |
| C | 3.8274   | 2.76648  | -1.25014 |

|   |          |          |          |
|---|----------|----------|----------|
| O | 3.92473  | -4.66248 | -1.41339 |
| O | 2.51529  | -2.19576 | 3.49684  |
| C | -3.14422 | 2.87619  | 0.2624   |
| O | -4.26664 | 2.11017  | 0.38018  |
| C | -3.92791 | 0.89565  | -0.16287 |
| N | -2.69873 | 0.86638  | -0.60925 |
| C | -4.97845 | -0.10242 | -0.15894 |
| C | -4.88151 | -1.40718 | -0.49209 |
| C | -3.58885 | -2.06863 | -0.95545 |
| C | -6.10428 | -2.28716 | -0.45751 |
| C | -3.48646 | -2.08885 | -2.4828  |
| O | -3.5187  | -3.42574 | -0.51444 |
| C | -3.16394 | -3.55946 | 0.84759  |
| H | 2.01899  | -4.263   | 0.38948  |
| H | 5.10454  | -2.09604 | -0.76699 |
| H | 4.66836  | -2.41316 | -2.45078 |
| H | 2.49923  | -1.24995 | -2.14015 |
| H | 0.41974  | -1.13005 | 1.08376  |
| H | 0.63532  | -2.73564 | 1.82139  |
| H | 2.60058  | -0.47279 | 2.35101  |
| H | 1.49055  | -0.14323 | 4.53728  |
| H | 0.18164  | -1.2101  | 4.06352  |
| H | -0.56299 | 1.10501  | 3.82696  |
| H | -0.51798 | 0.3371   | 2.25507  |
| H | 1.83911  | 1.45766  | 1.97794  |
| H | 2.1724   | 3.565    | 3.25904  |
| H | 2.06615  | 2.20927  | 4.39469  |
| H | 0.67391  | 3.28827  | 4.15376  |
| H | -0.69288 | 3.6091   | -0.68096 |
| H | -1.14588 | 2.077    | -2.73507 |
| H | -0.2088  | 0.85613  | -1.90481 |
| H | 4.76662  | 0.37164  | -0.87958 |
| H | 4.46681  | 0.25535  | -2.6103  |
| H | 2.35274  | 1.31857  | -0.68124 |
| H | 2.79079  | 2.03823  | -3.61139 |
| H | 1.80504  | 0.66121  | -3.13585 |
| H | 1.83223  | 4.26709  | -3.50937 |
| H | 0.08679  | 4.47007  | -2.94306 |
| H | 4.37257  | 2.68974  | -0.30195 |

|   |          |          |          |
|---|----------|----------|----------|
| H | 4.56404  | 2.95229  | -2.04345 |
| H | 3.17085  | 3.64035  | -1.19177 |
| H | 3.12594  | -2.66924 | 2.90851  |
| H | -3.18468 | 3.87891  | 0.65552  |
| H | -5.94337 | 0.2909   | 0.15172  |
| H | -2.7319  | -1.5093  | -0.56007 |
| H | -7.00016 | -1.71704 | -0.1953  |
| H | -6.26947 | -2.76305 | -1.43246 |
| H | -5.98673 | -3.10557 | 0.26116  |
| H | -2.5684  | -2.60632 | -2.77819 |
| H | -3.45903 | -1.06661 | -2.87059 |
| H | -4.33531 | -2.61755 | -2.92899 |
| H | -3.11497 | -4.63073 | 1.06061  |
| H | -2.18021 | -3.10841 | 1.05392  |
| H | -3.90073 | -3.09642 | 1.52231  |

**Compound 1b:** Isomer 2S, 5R, 11S, 13S, 17S, 23S conformer 5

|   |          |          |          |
|---|----------|----------|----------|
| C | -1.44485 | 2.62473  | 1.37115  |
| C | -0.24764 | 3.25658  | 1.2719   |
| C | 0.21273  | 3.83461  | 0.01283  |
| C | -0.76265 | 3.66387  | -1.15051 |
| C | -1.57884 | 2.38495  | -0.99221 |
| O | -2.24186 | 2.37106  | 0.30378  |
| C | -2.03846 | 2.12195  | 2.65366  |
| C | -2.20031 | 0.58309  | 2.73535  |
| C | -0.86568 | -0.16445 | 2.64572  |
| C | -0.95484 | -1.6617  | 2.98796  |
| C | -1.88789 | -2.54108 | 2.10765  |
| C | -1.21836 | -2.96768 | 0.80667  |
| C | -2.35931 | -3.78096 | 2.87776  |
| O | -0.99618 | -1.91169 | -0.02037 |
| O | -0.92004 | -4.10757 | 0.51797  |
| C | -0.40088 | -2.21938 | -1.31986 |
| C | -0.80058 | -1.09686 | -2.29347 |
| C | 1.0822   | -2.3825  | -1.18874 |
| C | -2.29745 | -1.00814 | -2.54557 |
| C | -2.62526 | 2.19402  | -2.08741 |
| C | -3.7046  | 1.11879  | -1.85283 |

|   |          |          |          |
|---|----------|----------|----------|
| C | -3.17392 | -0.30491 | -1.51601 |
| C | -2.81792 | -1.60392 | -3.62657 |
| C | -4.68836 | 1.11949  | -3.03196 |
| O | 1.26472  | 4.45031  | -0.10748 |
| O | -2.79652 | 0.23986  | 3.98759  |
| C | 1.79326  | -3.53997 | -1.21405 |
| O | 3.11283  | -3.23092 | -1.0784  |
| C | 3.14879  | -1.8618  | -0.96061 |
| N | 1.96149  | -1.31686 | -1.031   |
| C | 4.47794  | -1.30644 | -0.79388 |
| C | 4.82984  | -0.05471 | -0.43259 |
| C | 3.8373   | 1.0581   | -0.12041 |
| C | 6.28852  | 0.30864  | -0.32095 |
| C | 3.72275  | 2.06412  | -1.26835 |
| O | 4.25643  | 1.79043  | 1.03416  |
| C | 4.01646  | 1.11235  | 2.25072  |
| H | 0.36267  | 3.40688  | 2.15512  |
| H | -1.43344 | 4.53536  | -1.17141 |
| H | -0.20409 | 3.65702  | -2.09157 |
| H | -0.88785 | 1.53281  | -0.9685  |
| H | -1.42915 | 2.45651  | 3.49877  |
| H | -3.03582 | 2.5728   | 2.76723  |
| H | -2.85369 | 0.26455  | 1.90982  |
| H | -0.16333 | 0.2988   | 3.35244  |
| H | -0.44865 | -0.02194 | 1.64363  |
| H | -1.31387 | -1.749   | 4.01779  |
| H | 0.05643  | -2.08901 | 2.97395  |
| H | -2.76607 | -1.94417 | 1.83026  |
| H | -2.9969  | -4.41859 | 2.2584   |
| H | -2.92536 | -3.47296 | 3.76288  |
| H | -1.50723 | -4.38638 | 3.20329  |
| H | -0.82943 | -3.16758 | -1.65256 |
| H | -0.2816  | -1.30853 | -3.23536 |
| H | -0.38493 | -0.15761 | -1.91575 |
| H | -3.13587 | 3.15304  | -2.24962 |
| H | -2.07849 | 1.97798  | -3.01597 |
| H | -4.26379 | 1.42515  | -0.95904 |
| H | -2.6353  | -0.25335 | -0.56722 |
| H | -4.0593  | -0.92733 | -1.33005 |

|   |          |          |          |
|---|----------|----------|----------|
| H | -3.88779 | -1.62408 | -3.81557 |
| H | -2.19146 | -2.10728 | -4.35995 |
| H | -5.12491 | 2.11516  | -3.17572 |
| H | -4.19445 | 0.83303  | -3.96703 |
| H | -5.51255 | 0.41698  | -2.85922 |
| H | -3.67761 | 0.64387  | 4.02095  |
| H | 1.53368  | -4.58308 | -1.29404 |
| H | 5.26362  | -2.0346  | -0.98227 |
| H | 2.84739  | 0.62196  | 0.06248  |
| H | 6.93466  | -0.53876 | -0.56796 |
| H | 6.53746  | 1.1383   | -0.99488 |
| H | 6.52932  | 0.65649  | 0.68918  |
| H | 4.69437  | 2.51446  | -1.49703 |
| H | 3.03535  | 2.8654   | -0.98236 |
| H | 3.34596  | 1.5662   | -2.16778 |
| H | 4.57759  | 0.16746  | 2.32413  |
| H | 4.34065  | 1.77856  | 3.055    |
| H | 2.94619  | 0.88664  | 2.38222  |

**Compound 1b:** Isomer 2S, 5R, 11S, 13S, 17S, 23S conformer 6

|   |          |          |          |
|---|----------|----------|----------|
| C | -1.64397 | -2.01349 | -2.067   |
| C | -0.34154 | -2.31301 | -2.30832 |
| C | 0.47562  | -3.02258 | -1.33311 |
| C | -0.27507 | -3.44566 | -0.07274 |
| C | -1.37785 | -2.44311 | 0.25801  |
| O | -2.26198 | -2.26774 | -0.88972 |
| C | -2.55004 | -1.32528 | -3.04381 |
| C | -2.91169 | 0.12935  | -2.64335 |
| C | -1.68739 | 1.0485   | -2.57827 |
| C | -2.02093 | 2.53222  | -2.34845 |
| C | -2.66656 | 2.90034  | -0.98519 |
| C | -1.64021 | 2.85741  | 0.14012  |
| C | -3.29734 | 4.2991   | -1.04531 |
| O | -1.53962 | 1.61888  | 0.68964  |
| O | -0.9846  | 3.80642  | 0.51701  |
| C | -0.64224 | 1.48827  | 1.83583  |
| C | -1.09489 | 0.27706  | 2.68116  |
| C | 0.77127  | 1.33508  | 1.35961  |

|   |          |          |          |
|---|----------|----------|----------|
| C | -2.59467 | 0.13832  | 2.87509  |
| C | -2.21574 | -2.84624 | 1.46981  |
| C | -3.51971 | -2.06268 | 1.73836  |
| C | -3.41105 | -0.50966 | 1.76728  |
| C | -3.17322 | 0.59672  | 3.99182  |
| C | -4.19561 | -2.61077 | 3.00366  |
| O | 1.65923  | -3.29666 | -1.50938 |
| O | -3.80114 | 0.67997  | -3.61579 |
| C | 1.77784  | 2.24594  | 1.34455  |
| O | 2.87995  | 1.65052  | 0.79393  |
| C | 2.48224  | 0.37368  | 0.48694  |
| N | 1.23263  | 0.14827  | 0.8061   |
| C | 3.37157  | -0.57311 | -0.1527  |
| C | 4.69586  | -0.48866 | -0.40382 |
| C | 5.58122  | 0.69577  | -0.02949 |
| C | 5.37553  | -1.6169  | -1.13996 |
| C | 5.7539   | 1.66639  | -1.20123 |
| O | 6.89115  | 0.26426  | 0.343    |
| C | 6.95141  | -0.30228 | 1.63756  |
| H | 0.1069   | -2.05093 | -3.25985 |
| H | -0.70519 | -4.4443  | -0.2402  |
| H | 0.43468  | -3.52412 | 0.75606  |
| H | -0.90666 | -1.4658  | 0.40823  |
| H | -2.08984 | -1.31235 | -4.03659 |
| H | -3.48408 | -1.90107 | -3.11576 |
| H | -3.4023  | 0.09921  | -1.65942 |
| H | -1.1513  | 0.96562  | -3.53344 |
| H | -1.00872 | 0.67738  | -1.80269 |
| H | -2.71301 | 2.85197  | -3.13388 |
| H | -1.10728 | 3.12836  | -2.47007 |
| H | -3.44381 | 2.16406  | -0.75231 |
| H | -3.75781 | 4.57246  | -0.09013 |
| H | -4.06971 | 4.32779  | -1.82087 |
| H | -2.54049 | 5.05455  | -1.27642 |
| H | -0.73697 | 2.41036  | 2.41338  |
| H | -0.60213 | 0.389    | 3.65439  |
| H | -0.67722 | -0.62515 | 2.23111  |
| H | -2.48458 | -3.90665 | 1.36651  |
| H | -1.55373 | -2.78948 | 2.34509  |



|   |          |          |          |
|---|----------|----------|----------|
| H | -4.18374 | -2.27419 | 0.88963  |
| H | -3.02854 | -0.17409 | 0.80043  |
| H | -4.43995 | -0.13418 | 1.84099  |
| H | -4.24741 | 0.5333   | 4.14805  |
| H | -2.59627 | 1.05597  | 4.79175  |
| H | -4.34872 | -3.6943  | 2.93266  |
| H | -3.59137 | -2.41242 | 3.89627  |
| H | -5.17618 | -2.14515 | 3.15903  |
| H | -4.62312 | 0.16571  | -3.59558 |
| H | 1.86939  | 3.28114  | 1.63031  |
| H | 2.84176  | -1.46663 | -0.47212 |
| H | 5.13609  | 1.24006  | 0.8125   |
| H | 5.89022  | -1.24471 | -2.03508 |
| H | 6.1481   | -2.08812 | -0.52192 |
| H | 4.65351  | -2.3785  | -1.44563 |
| H | 6.19425  | 1.16094  | -2.06668 |
| H | 6.42116  | 2.48198  | -0.90523 |
| H | 4.78648  | 2.08564  | -1.49298 |
| H | 6.33263  | -1.20793 | 1.72873  |
| H | 7.99616  | -0.56823 | 1.81995  |
| H | 6.62584  | 0.41556  | 2.40725  |

**Compound 1b:** Isomer 2S, 5R, 11S, 13S, 17S, 23S conformer 8

|   |          |          |          |
|---|----------|----------|----------|
| C | -1.30813 | 2.36179  | 0.73763  |
| C | -1.38994 | 3.71158  | 0.63625  |
| C | -2.54415 | 4.36444  | 0.02249  |
| C | -3.66677 | 3.41135  | -0.40285 |
| C | -3.12208 | 2.04597  | -0.81379 |
| O | -2.23345 | 1.52576  | 0.20817  |
| C | -0.19897 | 1.58623  | 1.39737  |
| C | -0.70077 | 0.4182   | 2.27339  |
| C | 0.42593  | -0.54195 | 2.65526  |
| C | -0.05773 | -1.85685 | 3.29185  |
| C | -1.01169 | -2.74126 | 2.43948  |
| C | -0.37451 | -3.13418 | 1.11212  |
| C | -1.42013 | -3.99911 | 3.21739  |
| O | -0.54101 | -2.16506 | 0.17402  |
| O | 0.22111  | -4.16995 | 0.90005  |

|   |          |          |          |
|---|----------|----------|----------|
| C | 0.09744  | -2.38243 | -1.12294 |
| C | -0.56875 | -1.4026  | -2.09624 |
| C | 1.58252  | -2.18257 | -1.03341 |
| C | -1.95866 | -1.77521 | -2.60368 |
| C | -4.19858 | 0.98195  | -1.03269 |
| C | -3.6746  | -0.45573 | -1.24131 |
| C | -2.97581 | -0.65051 | -2.6162  |
| C | -2.25221 | -2.9969  | -3.0612  |
| C | -4.81321 | -1.47017 | -1.06553 |
| O | -2.65428 | 5.57712  | -0.0975  |
| O | -1.28958 | 0.88547  | 3.48994  |
| C | 2.55047  | -3.13575 | -1.00272 |
| O | 3.76256  | -2.51327 | -0.98938 |
| C | 3.47543  | -1.1713  | -1.00082 |
| N | 2.18892  | -0.92969 | -1.03124 |
| C | 4.63133  | -0.29605 | -1.02749 |
| C | 4.67101  | 1.03814  | -0.82822 |
| C | 3.44426  | 1.87437  | -0.48994 |
| C | 5.97355  | 1.7835   | -0.96388 |
| C | 2.83389  | 2.52478  | -1.7335  |
| O | 3.77198  | 2.93111  | 0.41366  |
| C | 3.97592  | 2.49852  | 1.74541  |
| H | -0.6089  | 4.33707  | 1.05383  |
| H | -4.35429 | 3.29847  | 0.44846  |
| H | -4.23257 | 3.86805  | -1.22042 |
| H | -2.50267 | 2.16853  | -1.71454 |
| H | 0.42048  | 1.16343  | 0.59372  |
| H | 0.42816  | 2.26068  | 1.98907  |
| H | -1.44416 | -0.12894 | 1.68526  |
| H | 1.08595  | -0.03159 | 3.36963  |
| H | 1.02251  | -0.75228 | 1.76188  |
| H | -0.58555 | -1.62482 | 4.22393  |
| H | 0.81739  | -2.46133 | 3.56441  |
| H | -1.90808 | -2.15589 | 2.20677  |
| H | -2.13821 | -4.60242 | 2.65216  |
| H | -1.88218 | -3.71977 | 4.17023  |
| H | -0.54813 | -4.6271  | 3.42223  |
| H | -0.09211 | -3.42001 | -1.40523 |
| H | 0.09793  | -1.28773 | -2.9609  |

|   |          |          |          |
|---|----------|----------|----------|
| H | -0.59085 | -0.42247 | -1.60952 |
| H | -4.85935 | 0.99061  | -0.15514 |
| H | -4.81491 | 1.29117  | -1.88878 |
| H | -2.93338 | -0.65004 | -0.45854 |
| H | -3.74095 | -0.83927 | -3.38038 |
| H | -2.46627 | 0.27705  | -2.91126 |
| H | -3.23208 | -3.22906 | -3.47016 |
| H | -1.53285 | -3.81261 | -3.05706 |
| H | -5.24267 | -1.41338 | -0.05828 |
| H | -5.62253 | -1.28717 | -1.78494 |
| H | -4.45141 | -2.49213 | -1.21911 |
| H | -2.10074 | 1.3659   | 3.26208  |
| H | 2.54594  | -4.21296 | -0.96951 |
| H | 5.55761  | -0.82095 | -1.24912 |
| H | 2.68741  | 1.22525  | -0.03227 |
| H | 6.78843  | 1.11459  | -1.25535 |
| H | 5.89036  | 2.57482  | -1.71999 |
| H | 6.24799  | 2.28574  | -0.03015 |
| H | 3.55838  | 3.17527  | -2.23443 |
| H | 1.97399  | 3.13489  | -1.43901 |
| H | 2.50039  | 1.75422  | -2.43424 |
| H | 3.08531  | 1.98972  | 2.14592  |
| H | 4.832    | 1.81292  | 1.83941  |
| H | 4.17312  | 3.39268  | 2.34279  |

**Compound 1b:** Isomer 2S, 5R, 11S, 13S, 17S, 23S conformer 9

|   |          |          |          |
|---|----------|----------|----------|
| C | -1.81954 | -2.6245  | -1.46403 |
| C | -0.6657  | -2.84629 | -2.14348 |
| C | 0.56398  | -3.23287 | -1.46234 |
| C | 0.42352  | -3.38807 | 0.05053  |
| C | -0.64731 | -2.44919 | 0.59946  |
| O | -1.9032  | -2.6446  | -0.11162 |
| C | -3.1313  | -2.29022 | -2.10806 |
| C | -3.61248 | -0.8417  | -1.83481 |
| C | -2.62985 | 0.21618  | -2.34875 |
| C | -3.15905 | 1.65726  | -2.27388 |
| C | -3.44007 | 2.22578  | -0.85477 |
| C | -2.16365 | 2.6985   | -0.16776 |

|   |          |          |          |
|---|----------|----------|----------|
| C | -4.44265 | 3.38589  | -0.9239  |
| O | -1.4245  | 1.67346  | 0.32536  |
| O | -1.83691 | 3.86335  | -0.05476 |
| C | -0.2848  | 2.04492  | 1.17488  |
| C | -0.02695 | 0.88526  | 2.14963  |
| C | 0.92583  | 2.39003  | 0.34945  |
| C | -1.22614 | 0.51245  | 3.00542  |
| C | -0.89341 | -2.62477 | 2.09647  |
| C | -2.14075 | -1.94353 | 2.69725  |
| C | -2.28325 | -0.41722 | 2.42721  |
| C | -1.35325 | 1.03447  | 4.23198  |
| C | -2.23548 | -2.27741 | 4.193    |
| O | 1.61676  | -3.46132 | -2.04707 |
| O | -4.85704 | -0.62348 | -2.49945 |
| C | 1.15023  | 3.50856  | -0.39387 |
| O | 2.39911  | 3.41621  | -0.93138 |
| C | 2.9012   | 2.22338  | -0.47515 |
| N | 2.05414  | 1.57971  | 0.28753  |
| C | 4.26554  | 1.94053  | -0.87121 |
| C | 5.01317  | 0.85329  | -0.585   |
| C | 4.51515  | -0.33017 | 0.23901  |
| C | 6.45236  | 0.79722  | -1.02793 |
| C | 4.74632  | -0.09167 | 1.73501  |
| O | 5.20977  | -1.5266  | -0.09897 |
| C | 4.75218  | -2.14337 | -1.29381 |
| H | -0.65328 | -2.78613 | -3.22574 |
| H | 0.1535   | -4.43222 | 0.26671  |
| H | 1.3897   | -3.1944  | 0.52664  |
| H | -0.35278 | -1.41635 | 0.37477  |
| H | -3.06242 | -2.43834 | -3.19003 |
| H | -3.89477 | -2.98253 | -1.72421 |
| H | -3.74133 | -0.7258  | -0.74856 |
| H | -2.40278 | -0.00911 | -3.39953 |
| H | -1.69044 | 0.12366  | -1.7941  |
| H | -4.09887 | 1.70227  | -2.83245 |
| H | -2.45634 | 2.32473  | -2.78943 |
| H | -3.86277 | 1.42645  | -0.23466 |
| H | -4.63994 | 3.80557  | 0.06742  |
| H | -5.38885 | 3.03263  | -1.3468  |

|   |          |          |          |
|---|----------|----------|----------|
| H | -4.05918 | 4.19473  | -1.55325 |
| H | -0.6035  | 2.92921  | 1.7319   |
| H | 0.80181  | 1.20541  | 2.7905   |
| H | 0.34977  | 0.0314   | 1.58148  |
| H | -0.96613 | -3.70017 | 2.30888  |
| H | 0.01247  | -2.27557 | 2.61151  |
| H | -3.00998 | -2.39628 | 2.20223  |
| H | -2.34448 | -0.26195 | 1.34704  |
| H | -3.25881 | -0.1242  | 2.83653  |
| H | -2.21828 | 0.8282   | 4.8575   |
| H | -0.59933 | 1.69425  | 4.65619  |
| H | -2.22408 | -3.36191 | 4.35454  |
| H | -1.40019 | -1.84417 | 4.75442  |
| H | -3.16433 | -1.88665 | 4.62527  |
| H | -5.51176 | -1.22901 | -2.1183  |
| H | 0.56858  | 4.38446  | -0.62672 |
| H | 4.71582  | 2.74893  | -1.44213 |
| H | 3.43814  | -0.46187 | 0.07027  |
| H | 6.75537  | 1.72807  | -1.51628 |
| H | 7.1145   | 0.62164  | -0.17073 |
| H | 6.62916  | -0.03338 | -1.71977 |
| H | 5.80918  | 0.06978  | 1.94428  |
| H | 4.41815  | -0.97148 | 2.29773  |
| H | 4.17826  | 0.77975  | 2.07146  |
| H | 4.85247  | -1.48198 | -2.16815 |
| H | 5.37945  | -3.02539 | -1.4495  |
| H | 3.70424  | -2.46275 | -1.21978 |

**Compound 1b:** Isomer 2S, 5R, 11S, 13S, 17S, 23S conformer 10

|   |         |          |          |
|---|---------|----------|----------|
| C | 2.27138 | -2.31289 | 0.0209   |
| C | 2.95704 | -3.29105 | -0.62467 |
| C | 4.23248 | -3.03237 | -1.2849  |
| C | 4.74015 | -1.59881 | -1.12869 |
| C | 3.58722 | -0.60312 | -1.03067 |
| O | 2.64244 | -1.01089 | 0.00123  |
| C | 1.01828 | -2.5559  | 0.81621  |
| C | 1.11952 | -2.34468 | 2.35208  |
| C | 1.30984 | -0.8957  | 2.81802  |

|   |          |          |          |
|---|----------|----------|----------|
| C | 0.1762   | 0.05385  | 2.40512  |
| C | 0.47099  | 1.54449  | 2.71923  |
| C | -0.35293 | 2.44904  | 1.80556  |
| C | 0.25836  | 1.91692  | 4.18882  |
| O | -0.09837 | 2.15146  | 0.504    |
| O | -1.12137 | 3.31758  | 2.15487  |
| C | -0.89029 | 2.80311  | -0.52164 |
| C | -0.16953 | 2.53662  | -1.85389 |
| C | -2.28472 | 2.25103  | -0.52062 |
| C | 1.19618  | 3.19692  | -2.01642 |
| C | 4.04021  | 0.81386  | -0.68923 |
| C | 2.92625  | 1.87891  | -0.59446 |
| C | 2.4328   | 2.31591  | -1.99877 |
| C | 1.28495  | 4.5147   | -2.23169 |
| C | 3.42429  | 3.08523  | 0.2137   |
| O | 4.88298  | -3.8899  | -1.86742 |
| O | -0.0832  | -2.81372 | 2.9699   |
| C | -3.454   | 2.88688  | -0.25062 |
| O | -4.47133 | 1.99019  | -0.40117 |
| C | -3.85789 | 0.81338  | -0.75064 |
| N | -2.55838 | 0.92731  | -0.84402 |
| C | -4.74328 | -0.31229 | -0.97261 |
| C | -4.40844 | -1.61562 | -1.07844 |
| C | -2.9801  | -2.13488 | -0.95763 |
| C | -5.47159 | -2.64637 | -1.35912 |
| C | -2.31734 | -2.28323 | -2.32937 |
| O | -2.95439 | -3.42305 | -0.33975 |
| C | -3.14999 | -3.38341 | 1.0642   |
| H | 2.58968  | -4.31105 | -0.61205 |
| H | 5.35342  | -1.55149 | -0.21667 |
| H | 5.39074  | -1.35401 | -1.97361 |
| H | 3.02091  | -0.62109 | -1.97368 |
| H | 0.21381  | -1.92474 | 0.42235  |
| H | 0.71807  | -3.59618 | 0.64586  |
| H | 1.97667  | -2.93392 | 2.71585  |
| H | 2.26082  | -0.53135 | 2.4143   |
| H | 1.40799  | -0.92128 | 3.91013  |
| H | -0.75601 | -0.24447 | 2.89868  |
| H | 0.00937  | -0.03657 | 1.32988  |

|   |          |          |          |
|---|----------|----------|----------|
| H | 1.51951  | 1.73448  | 2.4452   |
| H | 0.50183  | 2.96776  | 4.3711   |
| H | 0.88899  | 1.30013  | 4.83737  |
| H | -0.78638 | 1.76501  | 4.47897  |
| H | -0.92473 | 3.87383  | -0.30142 |
| H | -0.83714 | 2.89587  | -2.64625 |
| H | -0.09932 | 1.45092  | -1.97709 |
| H | 4.57098  | 0.76191  | 0.27102  |
| H | 4.78658  | 1.11704  | -1.4373  |
| H | 2.08298  | 1.43532  | -0.0585  |
| H | 3.25459  | 2.84461  | -2.50106 |
| H | 2.22679  | 1.41992  | -2.60191 |
| H | 2.24247  | 5.00914  | -2.37382 |
| H | 0.40397  | 5.15209  | -2.27774 |
| H | 3.71295  | 2.78626  | 1.22865  |
| H | 4.3044   | 3.54314  | -0.2583  |
| H | 2.65185  | 3.8558   | 0.29409  |
| H | -0.17759 | -3.75831 | 2.77007  |
| H | -3.72056 | 3.88569  | 0.05524  |
| H | -5.78965 | -0.02876 | -1.05817 |
| H | -2.38781 | -1.42792 | -0.36269 |
| H | -6.45104 | -2.18076 | -1.50229 |
| H | -5.22745 | -3.22177 | -2.26123 |
| H | -5.54577 | -3.37669 | -0.5462  |
| H | -1.30992 | -2.69368 | -2.20579 |
| H | -2.24557 | -1.30732 | -2.81734 |
| H | -2.88598 | -2.96432 | -2.97125 |
| H | -3.17512 | -4.42246 | 1.40666  |
| H | -2.33075 | -2.85618 | 1.57469  |
| H | -4.10039 | -2.90224 | 1.3406   |

**Compound 1b:** Isomer 2S, 5R, 11S, 13S, 17S, 23S conformer 11

|   |         |          |          |
|---|---------|----------|----------|
| C | 2.39057 | -2.28419 | 0.05881  |
| C | 3.09646 | -3.24806 | -0.58547 |
| C | 4.34218 | -2.95363 | -1.28646 |
| C | 4.79557 | -1.49769 | -1.17614 |
| C | 3.60612 | -0.54703 | -1.06688 |
| O | 2.70927 | -0.96777 | 0.00123  |

|   |          |          |          |
|---|----------|----------|----------|
| C | 1.16367  | -2.55915 | 0.88282  |
| C | 1.2844   | -2.29918 | 2.40018  |
| C | 1.44383  | -0.82936 | 2.82658  |
| C | 0.28513  | 0.08071  | 2.39801  |
| C | 0.52417  | 1.58259  | 2.69863  |
| C | -0.34719 | 2.4534   | 1.79436  |
| C | 0.32095  | 1.95804  | 4.16904  |
| O | -0.14216 | 2.1272   | 0.49296  |
| O | -1.10791 | 3.32404  | 2.15612  |
| C | -0.9725  | 2.75844  | -0.51798 |
| C | -0.29153 | 2.47857  | -1.86804 |
| C | -2.36115 | 2.19626  | -0.46021 |
| C | 1.05928  | 3.15373  | -2.08529 |
| C | 4.01281  | 0.89428  | -0.77216 |
| C | 2.86554  | 1.92313  | -0.67529 |
| C | 2.31237  | 2.29524  | -2.0762  |
| C | 1.12019  | 4.46612  | -2.34021 |
| C | 3.34817  | 3.17199  | 0.07564  |
| O | 5.01161  | -3.79697 | -1.86818 |
| O | 0.0902   | -2.87378 | 2.94573  |
| C | -3.51858 | 2.818    | -0.11624 |
| O | -4.53572 | 1.91564  | -0.22723 |
| C | -3.93368 | 0.74969  | -0.63121 |
| N | -2.64189 | 0.87628  | -0.79205 |
| C | -4.82255 | -0.37853 | -0.8217  |
| C | -4.48501 | -1.67403 | -0.99551 |
| C | -3.04713 | -2.18149 | -1.01295 |
| C | -5.55756 | -2.70815 | -1.22147 |
| C | -2.49804 | -2.25624 | -2.44036 |
| O | -2.95998 | -3.49587 | -0.46419 |
| C | -3.01913 | -3.52861 | 0.95255  |
| H | 2.77013  | -4.28082 | -0.53937 |
| H | 5.43115  | -1.40478 | -0.28306 |
| H | 5.41245  | -1.24703 | -2.04436 |
| H | 3.01485  | -0.61036 | -1.99243 |
| H | 0.32709  | -1.97342 | 0.48448  |
| H | 0.89975  | -3.61382 | 0.76728  |
| H | 2.16182  | -2.85782 | 2.7656   |
| H | 2.38433  | -0.44993 | 2.41091  |



|   |          |          |          |
|---|----------|----------|----------|
| H | 1.56104  | -0.81208 | 3.92101  |
| H | -0.64485 | -0.24383 | 2.88126  |
| H | 0.13231  | -0.02877 | 1.3229   |
| H | 1.56034  | 1.81236  | 2.40774  |
| H | 0.51686  | 3.02082  | 4.33696  |
| H | 0.99264  | 1.37975  | 4.81216  |
| H | -0.71042 | 1.76084  | 4.48015  |
| H | -1.00671 | 3.83165  | -0.31084 |
| H | -0.98892 | 2.81745  | -2.64344 |
| H | -0.21253 | 1.39206  | -1.97761 |
| H | 4.56856  | 0.88642  | 0.17531  |
| H | 4.72898  | 1.20523  | -1.54611 |
| H | 2.05571  | 1.47017  | -0.0974  |
| H | 3.10548  | 2.81887  | -2.62762 |
| H | 2.10317  | 1.37262  | -2.63618 |
| H | 2.06541  | 4.97146  | -2.52108 |
| H | 0.22766  | 5.08756  | -2.38124 |
| H | 3.67962  | 2.91781  | 1.08984  |
| H | 4.19668  | 3.64189  | -0.44031 |
| H | 2.55314  | 3.91925  | 0.15511  |
| H | 0.09879  | -2.7187  | 3.90351  |
| H | -3.77482 | 3.80919  | 0.22148  |
| H | -5.87484 | -0.10436 | -0.81724 |
| H | -2.41398 | -1.49577 | -0.43537 |
| H | -6.54996 | -2.25066 | -1.27139 |
| H | -5.38034 | -3.25416 | -2.15685 |
| H | -5.55762 | -3.46236 | -0.42724 |
| H | -1.48227 | -2.66352 | -2.41745 |
| H | -2.47164 | -1.25805 | -2.88603 |
| H | -3.11359 | -2.91169 | -3.06547 |
| H | -2.96903 | -4.58126 | 1.24423  |
| H | -2.17351 | -2.99581 | 1.41037  |
| H | -3.95646 | -3.09923 | 1.33942  |

**Compound 1b:** Isomer 2S, 5R, 11S, 13S, 17S, 23S conformer 12

|   |         |          |          |
|---|---------|----------|----------|
| C | -1.6503 | -2.03011 | -2.04984 |
| C | -0.3477 | -2.32941 | -2.29286 |
| C | 0.47589 | -3.02409 | -1.31299 |

|   |          |          |          |
|---|----------|----------|----------|
| C | -0.26951 | -3.43649 | -0.04633 |
| C | -1.37393 | -2.43383 | 0.27928  |
| O | -2.26183 | -2.26747 | -0.86706 |
| C | -2.56348 | -1.36189 | -3.03439 |
| C | -2.93221 | 0.0975   | -2.66101 |
| C | -1.70887 | 1.0265   | -2.57975 |
| C | -2.05746 | 2.5082   | -2.35965 |
| C | -2.68892 | 2.8772   | -0.9907  |
| C | -1.64696 | 2.85011  | 0.12132  |
| C | -3.33386 | 4.26953  | -1.04974 |
| O | -1.53702 | 1.61842  | 0.68241  |
| O | -0.99036 | 3.80559  | 0.47942  |
| C | -0.63561 | 1.502    | 1.82702  |
| C | -1.08432 | 0.29814  | 2.68491  |
| C | 0.77692  | 1.34762  | 1.34853  |
| C | -2.58362 | 0.16     | 2.88476  |
| C | -2.20756 | -2.83147 | 1.49587  |
| C | -3.51175 | -2.04862 | 1.76504  |
| C | -3.4048  | -0.49546 | 1.78474  |
| C | -3.15762 | 0.62552  | 4.00092  |
| C | -4.18135 | -2.59051 | 3.03632  |
| O | 1.66017  | -3.29514 | -1.49055 |
| O | -3.91427 | 0.58399  | -3.57662 |
| C | 1.78384  | 2.25802  | 1.32965  |
| O | 2.88552  | 1.66017  | 0.78068  |
| C | 2.48712  | 0.38227  | 0.47869  |
| N | 1.23753  | 0.15867  | 0.79911  |
| C | 3.37577  | -0.56771 | -0.15717 |
| C | 4.7002   | -0.48536 | -0.40828 |
| C | 5.58638  | 0.70003  | -0.03888 |
| C | 5.37929  | -1.61749 | -1.13896 |
| C | 5.7593   | 1.66589  | -1.21455 |
| O | 6.89614  | 0.26936  | 0.33482  |
| C | 6.95672  | -0.29175 | 1.63182  |
| H | 0.09579  | -2.08071 | -3.25039 |
| H | -0.69761 | -4.43774 | -0.20296 |
| H | 0.44281  | -3.5052  | 0.7811   |
| H | -0.90471 | -1.45443 | 0.42169  |
| H | -2.09299 | -1.37468 | -4.02536 |

|   |          |          |          |
|---|----------|----------|----------|
| H | -3.50119 | -1.92626 | -3.10132 |
| H | -3.44833 | 0.07777  | -1.69649 |
| H | -1.14963 | 0.94266  | -3.52511 |
| H | -1.03236 | 0.66565  | -1.79688 |
| H | -2.77024 | 2.81297  | -3.1339  |
| H | -1.15633 | 3.11845  | -2.50175 |
| H | -3.45606 | 2.13495  | -0.74496 |
| H | -3.78342 | 4.54246  | -0.0894  |
| H | -4.11842 | 4.28622  | -1.81325 |
| H | -2.58779 | 5.03141  | -1.29474 |
| H | -0.73127 | 2.42971  | 2.39542  |
| H | -0.58862 | 0.4195   | 3.65551  |
| H | -0.66714 | -0.60774 | 2.24175  |
| H | -2.47497 | -3.89279 | 1.39873  |
| H | -1.54248 | -2.76934 | 2.36851  |
| H | -4.17898 | -2.2654  | 0.92038  |
| H | -3.0279  | -0.16566 | 0.81383  |
| H | -4.43361 | -0.12071 | 1.86091  |
| H | -4.23112 | 0.56264  | 4.16184  |
| H | -2.57756 | 1.08988  | 4.79568  |
| H | -4.333   | -3.67467 | 2.97211  |
| H | -3.57384 | -2.38604 | 3.92538  |
| H | -5.16212 | -2.12578 | 3.19264  |
| H | -3.49118 | 0.65486  | -4.44854 |
| H | 1.87627  | 3.29405  | 1.6122   |
| H | 2.84536  | -1.46243 | -0.47233 |
| H | 5.14172  | 1.24796  | 0.80101  |
| H | 5.89506  | -1.24985 | -2.03535 |
| H | 6.15093  | -2.08668 | -0.51826 |
| H | 4.65676  | -2.37985 | -1.44152 |
| H | 6.19892  | 1.15664  | -2.07815 |
| H | 6.42733  | 2.48214  | -0.92211 |
| H | 4.79205  | 2.08475  | -1.50748 |
| H | 6.33729  | -1.19651 | 1.72714  |
| H | 8.00136  | -0.55772 | 1.81468  |
| H | 6.63215  | 0.42963  | 2.39858  |

**Compound 1b:** Isomer 2S, 5R, 11S, 13S, 17S, 23S conformer 13

|   |          |          |          |
|---|----------|----------|----------|
| C | 2.52474  | -2.22618 | -0.33131 |
| C | 3.43618  | -3.0325  | -0.93359 |
| C | 4.79523  | -2.5845  | -1.21765 |
| C | 5.10478  | -1.17023 | -0.72714 |
| C | 3.86362  | -0.28157 | -0.75782 |
| O | 2.75704  | -0.91879 | -0.05768 |
| C | 1.14936  | -2.67946 | 0.07133  |
| C | 0.85807  | -2.82493 | 1.58935  |
| C | 0.90988  | -1.51725 | 2.40537  |
| C | -0.1123  | -0.45688 | 1.97752  |
| C | 0.07085  | 0.92034  | 2.66788  |
| C | -0.67144 | 2.00072  | 1.88368  |
| C | -0.35196 | 0.93443  | 4.13923  |
| O | -0.22604 | 2.033    | 0.59894  |
| O | -1.53275 | 2.73741  | 2.30902  |
| C | -0.91342 | 2.86915  | -0.35991 |
| C | -0.0538  | 2.84336  | -1.63887 |
| C | -2.29471 | 2.33212  | -0.60363 |
| C | 1.31728  | 3.50545  | -1.53703 |
| C | 4.09296  | 1.08059  | -0.10708 |
| C | 2.88886  | 2.04485  | -0.05745 |
| C | 2.55742  | 2.62987  | -1.45567 |
| C | 1.41515  | 4.83946  | -1.58484 |
| C | 3.16811  | 3.16057  | 0.9595   |
| O | 5.645    | -3.2841  | -1.75304 |
| O | -0.37874 | -3.50967 | 1.76793  |
| C | -3.49433 | 2.96963  | -0.58593 |
| O | -4.46667 | 2.05502  | -0.87645 |
| C | -3.79935 | 0.87018  | -1.04556 |
| N | -2.50488 | 0.99691  | -0.91269 |
| C | -4.63238 | -0.29026 | -1.3088  |
| C | -4.28184 | -1.5931  | -1.25069 |
| C | -2.87936 | -2.05744 | -0.88565 |
| C | -5.29203 | -2.66756 | -1.56548 |
| C | -2.18177 | -2.73302 | -2.06693 |
| O | -2.89452 | -3.0223  | 0.18677  |
| C | -3.51595 | -2.56072 | 1.38406  |
| H | 3.17994  | -4.05943 | -1.16841 |
| H | 5.48641  | -1.2414  | 0.30201  |

|   |          |          |          |
|---|----------|----------|----------|
| H | 5.90184  | -0.74304 | -1.34312 |
| H | 3.53109  | -0.17232 | -1.80088 |
| H | 0.42038  | -1.98631 | -0.36821 |
| H | 0.9756   | -3.66545 | -0.37035 |
| H | 1.6202   | -3.49703 | 2.00427  |
| H | 1.922    | -1.10089 | 2.32801  |
| H | 0.75323  | -1.79412 | 3.45486  |
| H | -1.1259  | -0.82236 | 2.18249  |
| H | -0.04062 | -0.29923 | 0.89869  |
| H | 1.13711  | 1.18058  | 2.59403  |
| H | -0.19399 | 1.91996  | 4.58706  |
| H | 0.22256  | 0.20006  | 4.71231  |
| H | -1.41572 | 0.69463  | 4.23944  |
| H | -0.98133 | 3.88546  | 0.04031  |
| H | -0.63819 | 3.35325  | -2.41393 |
| H | 0.03666  | 1.79745  | -1.95213 |
| H | 4.43601  | 0.89435  | 0.91967  |
| H | 4.93394  | 1.55925  | -0.62942 |
| H | 2.02082  | 1.47846  | 0.28735  |
| H | 3.42243  | 3.2167   | -1.79425 |
| H | 2.4439   | 1.80309  | -2.17126 |
| H | 2.37531  | 5.34653  | -1.53411 |
| H | 0.53925  | 5.47882  | -1.6779  |
| H | 3.3459   | 2.74528  | 1.95883  |
| H | 4.05899  | 3.73942  | 0.67969  |
| H | 2.32774  | 3.85725  | 1.02632  |
| H | -1.02399 | -3.24275 | 1.08621  |
| H | -3.81821 | 3.97833  | -0.38577 |
| H | -5.65979 | -0.03452 | -1.55782 |
| H | -2.29217 | -1.19209 | -0.56587 |
| H | -6.30477 | -2.2606  | -1.63736 |
| H | -5.05897 | -3.1571  | -2.52056 |
| H | -5.27884 | -3.45476 | -0.80399 |
| H | -2.73727 | -3.61296 | -2.40497 |
| H | -1.17918 | -3.05936 | -1.77637 |
| H | -2.08966 | -2.02997 | -2.90084 |
| H | -3.15621 | -1.56241 | 1.66663  |
| H | -4.6085  | -2.52133 | 1.28587  |
| H | -3.24762 | -3.27334 | 2.16684  |

**Compound 1b:** Isomer 2S, 5R, 11S, 13S, 17S, 23S conformer 15

|   |          |          |          |
|---|----------|----------|----------|
| C | -1.68707 | -2.08744 | -1.95739 |
| C | -0.40005 | -2.4944  | -2.10642 |
| C | 0.30509  | -3.21052 | -1.05071 |
| C | -0.54473 | -3.50607 | 0.18294  |
| C | -1.57736 | -2.40328 | 0.39773  |
| O | -2.38448 | -2.22907 | -0.80538 |
| C | -2.48808 | -1.3973  | -3.02089 |
| C | -2.77438 | 0.09791  | -2.72225 |
| C | -1.49812 | 0.94227  | -2.64567 |
| C | -1.74663 | 2.45491  | -2.51756 |
| C | -2.43411 | 2.94472  | -1.21426 |
| C | -1.46971 | 2.9081   | -0.03547 |
| C | -2.97064 | 4.37283  | -1.38901 |
| O | -1.47798 | 1.70158  | 0.58858  |
| O | -0.77272 | 3.83574  | 0.31979  |
| C | -0.63801 | 1.57799  | 1.77778  |
| C | -1.19982 | 0.44371  | 2.66385  |
| C | 0.77927  | 1.31227  | 1.36774  |
| C | -2.712   | 0.40637  | 2.80006  |
| C | -2.50563 | -2.66909 | 1.58194  |
| C | -3.75694 | -1.77628 | 1.73297  |
| C | -3.52334 | -0.23811 | 1.68609  |
| C | -3.30397 | 0.94907  | 3.87113  |
| C | -4.54074 | -2.2006  | 2.98309  |
| O | 1.47081  | -3.58316 | -1.14391 |
| O | -3.57782 | 0.64311  | -3.77004 |
| C | 1.8448   | 2.15286  | 1.35826  |
| O | 2.92307  | 1.46441  | 0.8711   |
| C | 2.44977  | 0.20596  | 0.594    |
| N | 1.17745  | 0.07681  | 0.87512  |
| C | 3.29602  | -0.82247 | 0.02852  |
| C | 4.62471  | -0.82048 | -0.21261 |
| C | 5.54499  | 0.35633  | 0.06851  |
| C | 5.26182  | -2.03414 | -0.8387  |
| C | 5.61352  | 1.30408  | -1.14203 |
| O | 6.83286  | -0.17973 | 0.38408  |
| C | 7.6701   | 0.70073  | 1.10212  |
| H | 0.11857  | -2.32092 | -3.04254 |

|   |          |          |          |
|---|----------|----------|----------|
| H | -1.0469  | -4.4742  | 0.03855  |
| H | 0.10988  | -3.59761 | 1.05467  |
| H | -1.03798 | -1.45764 | 0.51954  |
| H | -1.97343 | -1.47075 | -3.98383 |
| H | -3.45328 | -1.91533 | -3.11756 |
| H | -3.31359 | 0.15784  | -1.76569 |
| H | -0.92444 | 0.77089  | -3.56667 |
| H | -0.8814  | 0.57593  | -1.81773 |
| H | -2.37689 | 2.76852  | -3.35578 |
| H | -0.79136 | 2.98511  | -2.62449 |
| H | -3.26731 | 2.27303  | -0.97984 |
| H | -3.463   | 4.7299   | -0.47834 |
| H | -3.69743 | 4.40161  | -2.20745 |
| H | -2.15618 | 5.06623  | -1.61867 |
| H | -0.69642 | 2.53368  | 2.30322  |
| H | -0.73997 | 0.57824  | 3.65025  |
| H | -0.82149 | -0.50504 | 2.27909  |
| H | -2.84924 | -3.71129 | 1.52385  |
| H | -1.88727 | -2.6081  | 2.48841  |
| H | -4.38804 | -1.98393 | 0.85855  |
| H | -3.06526 | 0.00775  | 0.72544  |
| H | -4.51969 | 0.22279  | 1.68148  |
| H | -4.3854  | 0.95989  | 3.98394  |
| H | -2.73104 | 1.40646  | 4.675    |
| H | -4.77513 | -3.27153 | 2.95745  |
| H | -3.97098 | -2.00126 | 3.8978   |
| H | -5.4881  | -1.65361 | 3.05784  |
| H | -4.43094 | 0.18198  | -3.7642  |
| H | 1.99654  | 3.18972  | 1.6103   |
| H | 2.72818  | -1.7116  | -0.23091 |
| H | 5.17327  | 0.91754  | 0.93514  |
| H | 4.51128  | -2.79055 | -1.0824  |
| H | 5.80139  | -1.76549 | -1.75629 |
| H | 6.00765  | -2.46647 | -0.16318 |
| H | 5.96115  | 0.76677  | -2.03046 |
| H | 6.30336  | 2.13337  | -0.9516  |
| H | 4.62666  | 1.72771  | -1.35016 |
| H | 7.95944  | 1.587    | 0.51741  |
| H | 7.1946   | 1.04247  | 2.03573  |

H 8.57549 0.14066 1.35195

**Compound 1b:** Isomer 2S, 5R, 11S, 13S, 17S, 23S conformer 16

C 2.73325 -2.14587 -0.09569  
C 3.5902 -2.98828 -0.72683  
C 4.82884 -2.51434 -1.33655  
C 5.0885 -1.01995 -1.14811  
C 3.78475 -0.22796 -1.08282  
O 2.88565 -0.79929 -0.0892  
C 1.50656 -2.60121 0.64352  
C 1.54022 -2.45872 2.18064  
C 1.5757 -1.02023 2.726  
C 0.3745 -0.15742 2.31642  
C 0.50769 1.32986 2.72598  
C -0.42021 2.21649 1.89436  
C 0.29217 1.58225 4.2214  
O -0.27419 1.94791 0.57208  
O -1.16742 3.06636 2.32675  
C -1.12733 2.6482 -0.37243  
C -0.49204 2.44485 -1.75978  
C -2.52559 2.11278 -0.30267  
C 0.81512 3.19058 -2.0108  
C 3.99582 1.23827 -0.71518  
C 2.73411 2.12111 -0.61051  
C 2.12383 2.41834 -2.00543  
C 0.78813 4.49827 -2.29565  
C 3.07976 3.41958 0.1328  
O 5.63106 -3.24467 -1.90276  
O 0.36801 -3.15744 2.61664  
C -3.65899 2.76228 0.06819  
O -4.70554 1.89639 -0.05551  
C -4.14504 0.72223 -0.49402  
N -2.85085 0.81077 -0.6648  
C -5.0737 -0.37083 -0.69535  
C -4.78758 -1.67756 -0.87352  
C -3.37231 -2.22671 -0.90231  
C -5.89859 -2.67287 -1.07767  
C -2.8031 -2.21668 -2.3312



|   |          |          |          |
|---|----------|----------|----------|
| O | -3.42839 | -3.55275 | -0.37058 |
| C | -2.20237 | -4.02268 | 0.15511  |
| H | 3.39407  | -4.05451 | -0.73636 |
| H | 5.65311  | -0.88598 | -0.21357 |
| H | 5.71957  | -0.65931 | -1.96597 |
| H | 3.26242  | -0.3247  | -2.04575 |
| H | 0.63458  | -2.06309 | 0.25522  |
| H | 1.35193  | -3.66335 | 0.43399  |
| H | 2.43941  | -2.98304 | 2.5439   |
| H | 2.5037   | -0.54673 | 2.38455  |
| H | 1.64833  | -1.0829  | 3.82232  |
| H | -0.54808 | -0.57221 | 2.74158  |
| H | 0.26298  | -0.20021 | 1.23181  |
| H | 1.52499  | 1.65187  | 2.45355  |
| H | 0.41097  | 2.6417   | 4.46411  |
| H | 1.01067  | 1.0101   | 4.81758  |
| H | -0.71869 | 1.28755  | 4.52324  |
| H | -1.13746 | 3.708    | -0.10259 |
| H | -1.23505 | 2.78181  | -2.49181 |
| H | -0.37227 | 1.3672   | -1.91415 |
| H | 4.52234  | 1.2581   | 0.24874  |
| H | 4.68926  | 1.66794  | -1.45251 |
| H | 1.9893   | 1.57791  | -0.02338 |
| H | 2.86579  | 2.98145  | -2.58824 |
| H | 1.96633  | 1.46948  | -2.53747 |
| H | 1.69576  | 5.06034  | -2.50065 |
| H | -0.14372 | 5.05888  | -2.33776 |
| H | 3.45694  | 3.20776  | 1.14074  |
| H | 3.85794  | 3.98447  | -0.39838 |
| H | 2.20551  | 4.07001  | 0.22699  |
| H | 0.32396  | -3.08884 | 3.58341  |
| H | -3.8799  | 3.75231  | 0.4333   |
| H | -6.11561 | -0.06103 | -0.67835 |
| H | -2.72926 | -1.60145 | -0.26879 |
| H | -6.87638 | -2.18278 | -1.09412 |
| H | -5.76715 | -3.21963 | -2.02052 |
| H | -5.88552 | -3.42654 | -0.28396 |
| H | -1.8033  | -2.6639  | -2.34998 |
| H | -2.7214  | -1.18858 | -2.69492 |

|   |          |          |          |
|---|----------|----------|----------|
| H | -3.44517 | -2.78942 | -3.00884 |
| H | -1.42138 | -4.11497 | -0.61526 |
| H | -1.82215 | -3.37652 | 0.95972  |
| H | -2.39869 | -5.01724 | 0.56532  |

**Compound 1b:** Isomer 2S, 5R, 11S, 13S, 17S, 23S conformer 17

|   |          |          |          |
|---|----------|----------|----------|
| C | 2.25333  | -2.15792 | 0.52584  |
| C | 2.56711  | -3.4029  | 0.09215  |
| C | 3.55226  | -3.61461 | -0.96573 |
| C | 4.22171  | -2.33337 | -1.47338 |
| C | 3.26868  | -1.14449 | -1.39709 |
| O | 2.7152   | -1.02961 | -0.05962 |
| C | 1.35207  | -1.81898 | 1.67828  |
| C | 2.05392  | -0.95666 | 2.75615  |
| C | 1.07079  | -0.21217 | 3.67588  |
| C | 0.20625  | 0.86681  | 2.99715  |
| C | 0.9989   | 2.07588  | 2.42122  |
| C | 0.1315   | 2.7727   | 1.38068  |
| C | 1.45239  | 3.05912  | 3.50402  |
| O | 0.08607  | 2.04155  | 0.23826  |
| O | -0.46852 | 3.81484  | 1.53871  |
| C | -0.85308 | 2.477    | -0.79356 |
| C | -0.40101 | 1.82625  | -2.10727 |
| C | -2.24444 | 2.07747  | -0.39913 |
| C | 0.84949  | 2.41948  | -2.75145 |
| C | 3.90926  | 0.20567  | -1.7075  |
| C | 2.94635  | 1.41235  | -1.62702 |
| C | 2.06176  | 1.5199   | -2.89789 |
| C | 0.84537  | 3.67237  | -3.22098 |
| C | 3.73191  | 2.71015  | -1.39435 |
| O | 3.87324  | -4.71878 | -1.38455 |
| O | 2.97484  | -1.73738 | 3.51387  |
| C | -3.20307 | 2.83261  | 0.19994  |
| O | -4.3093  | 2.05438  | 0.37584  |
| C | -3.96445 | 0.82529  | -0.12946 |
| N | -2.74662 | 0.79799  | -0.60576 |
| C | -4.99815 | -0.18789 | -0.05915 |
| C | -4.89244 | -1.50115 | -0.35392 |

|   |          |          |          |
|---|----------|----------|----------|
| C | -3.6065  | -2.15887 | -0.84075 |
| C | -6.10015 | -2.39638 | -0.25044 |
| C | -3.56226 | -2.23984 | -2.36876 |
| O | -3.49526 | -3.49565 | -0.34812 |
| C | -3.08243 | -3.56609 | 1.00172  |
| H | 2.1388   | -4.27437 | 0.57425  |
| H | 5.10741  | -2.14207 | -0.85011 |
| H | 4.56711  | -2.49224 | -2.49933 |
| H | 2.41207  | -1.33401 | -2.06189 |
| H | 0.49664  | -1.26587 | 1.27012  |
| H | 0.96545  | -2.73776 | 2.1355   |
| H | 2.68755  | -0.22787 | 2.2451   |
| H | 1.66448  | 0.22873  | 4.48557  |
| H | 0.39976  | -0.94588 | 4.14942  |
| H | -0.52049 | 1.24881  | 3.72575  |
| H | -0.38149 | 0.41032  | 2.19335  |
| H | 1.87166  | 1.69154  | 1.88071  |
| H | 2.04966  | 3.87072  | 3.07635  |
| H | 2.06277  | 2.55198  | 4.25832  |
| H | 0.58767  | 3.51058  | 3.99986  |
| H | -0.79321 | 3.56582  | -0.85289 |
| H | -1.23834 | 1.91678  | -2.80965 |
| H | -0.27854 | 0.75454  | -1.92298 |
| H | 4.73214  | 0.34823  | -0.99475 |
| H | 4.36631  | 0.15165  | -2.70561 |
| H | 2.2879   | 1.25597  | -0.76604 |
| H | 2.68832  | 1.87994  | -3.7251  |
| H | 1.71631  | 0.5167   | -3.18566 |
| H | 1.71413  | 4.10157  | -3.71334 |
| H | -0.02641 | 4.31856  | -3.13756 |
| H | 4.28977  | 2.66855  | -0.45139 |
| H | 4.45632  | 2.88424  | -2.2015  |
| H | 3.06261  | 3.57537  | -1.35363 |
| H | 2.46293  | -2.38444 | 4.02625  |
| H | -3.25    | 3.84908  | 0.5551   |
| H | -5.95857 | 0.20142  | 0.27004  |
| H | -2.74527 | -1.5701  | -0.50184 |
| H | -6.99224 | -1.83321 | 0.0384   |
| H | -6.3001  | -2.89307 | -1.20852 |

|   |          |          |          |
|---|----------|----------|----------|
| H | -5.9407  | -3.19953 | 0.47728  |
| H | -2.64639 | -2.75252 | -2.67875 |
| H | -3.56936 | -1.234   | -2.79834 |
| H | -4.41728 | -2.80103 | -2.76002 |
| H | -3.00759 | -4.62656 | 1.25742  |
| H | -2.09806 | -3.09279 | 1.14729  |
| H | -3.79802 | -3.08487 | 1.68667  |

**Compound 1b:** Isomer 2S, 5R, 11S, 13S, 17S, 23S conformer 18

|   |          |          |          |
|---|----------|----------|----------|
| C | 3.96007  | 0.4291   | 1.58591  |
| C | 3.86152  | -0.06145 | 2.84865  |
| C | 3.88168  | -1.49602 | 3.11858  |
| C | 4.07381  | -2.35945 | 1.87108  |
| C | 3.41123  | -1.71435 | 0.6588   |
| O | 3.8941   | -0.34677 | 0.479    |
| C | 4.21155  | 1.87665  | 1.26538  |
| C | 3.17432  | 2.58402  | 0.36151  |
| C | 1.76464  | 2.5663   | 0.95629  |
| C | 0.73272  | 3.45785  | 0.23844  |
| C | 0.67352  | 3.36044  | -1.30462 |
| C | 0.60327  | 1.92257  | -1.79058 |
| C | -0.49524 | 4.19392  | -1.86046 |
| O | -0.53201 | 1.30168  | -1.39449 |
| O | 1.47125  | 1.37444  | -2.44518 |
| C | -0.62095 | -0.12393 | -1.70434 |
| C | 0.13658  | -0.89399 | -0.60337 |
| C | -2.0703  | -0.47331 | -1.78668 |
| C | 0.49099  | -2.32572 | -0.95066 |
| C | 3.66916  | -2.45243 | -0.65256 |
| C | 2.90941  | -1.93193 | -1.89606 |
| C | 1.49785  | -2.55773 | -2.06157 |
| C | -0.06929 | -3.34684 | -0.29132 |
| C | 3.72791  | -2.21531 | -3.16666 |
| O | 3.82342  | -1.97929 | 4.24159  |
| O | 3.5517   | 3.95719  | 0.20982  |
| C | -2.79234 | -0.83599 | -2.87916 |
| O | -4.07367 | -1.08323 | -2.48148 |
| C | -4.075   | -0.84771 | -1.12834 |

|   |          |          |          |
|---|----------|----------|----------|
| N | -2.90093 | -0.49511 | -0.67465 |
| C | -5.34789 | -1.03924 | -0.46313 |
| C | -5.6703  | -0.7186  | 0.80826  |
| C | -4.69729 | -0.08154 | 1.79392  |
| C | -7.04876 | -1.02215 | 1.33527  |
| C | -4.02635 | -1.13438 | 2.68008  |
| O | -5.37169 | 0.82798  | 2.66527  |
| C | -5.65678 | 2.07697  | 2.06518  |
| H | 3.87728  | 0.61596  | 3.69495  |
| H | 5.15296  | -2.48147 | 1.69557  |
| H | 3.65421  | -3.35314 | 2.05365  |
| H | 2.33606  | -1.63414 | 0.85681  |
| H | 4.29524  | 2.43964  | 2.20015  |
| H | 5.18926  | 1.93701  | 0.76308  |
| H | 3.16023  | 2.09026  | -0.61809 |
| H | 1.8169   | 2.88607  | 2.00556  |
| H | 1.41742  | 1.52606  | 0.97245  |
| H | 0.94624  | 4.50548  | 0.476    |
| H | -0.25936 | 3.23116  | 0.64784  |
| H | 1.61292  | 3.74851  | -1.70871 |
| H | -0.50954 | 4.1816   | -2.95607 |
| H | -0.39665 | 5.23603  | -1.53704 |
| H | -1.45571 | 3.8113   | -1.50138 |
| H | -0.14747 | -0.27474 | -2.6765  |
| H | -0.46793 | -0.86056 | 0.30786  |
| H | 1.0572   | -0.33405 | -0.41257 |
| H | 4.75009  | -2.40297 | -0.83887 |
| H | 3.43198  | -3.51299 | -0.49086 |
| H | 2.80382  | -0.84422 | -1.81538 |
| H | 1.08543  | -2.16621 | -3.00358 |
| H | 1.61127  | -3.64019 | -2.21065 |
| H | 0.18152  | -4.3806  | -0.51791 |
| H | -0.80554 | -3.18559 | 0.4921   |
| H | 4.70715  | -1.72553 | -3.12049 |
| H | 3.89823  | -3.29226 | -3.29861 |
| H | 3.21179  | -1.84637 | -4.0603  |
| H | 4.37686  | 3.98396  | -0.29919 |
| H | -2.57203 | -0.9691  | -3.92659 |
| H | -6.10174 | -1.49736 | -1.09889 |

|   |          |          |         |
|---|----------|----------|---------|
| H | -3.91519 | 0.45147  | 1.23974 |
| H | -7.65829 | -1.53915 | 0.5885  |
| H | -6.99263 | -1.65176 | 2.23236 |
| H | -7.56796 | -0.10735 | 1.64097 |
| H | -4.76856 | -1.70775 | 3.2455  |
| H | -3.36247 | -0.63724 | 3.394   |
| H | -3.43696 | -1.8222  | 2.06704 |
| H | -6.13703 | 2.6947   | 2.82895 |
| H | -4.73833 | 2.57897  | 1.72346 |
| H | -6.33731 | 1.98401  | 1.20448 |

**Compound 1b:** Isomer 2S, 5R, 11S, 13S, 17S, 23S conformer 19

|   |          |          |          |
|---|----------|----------|----------|
| C | 1.56184  | -2.51281 | 1.76967  |
| C | 0.25202  | -2.88483 | 1.78961  |
| C | -0.43976 | -3.32442 | 0.58516  |
| C | 0.45091  | -3.41465 | -0.6504  |
| C | 1.54476  | -2.34907 | -0.61257 |
| O | 2.29514  | -2.42937 | 0.63782  |
| C | 2.3137   | -2.06254 | 2.99034  |
| C | 1.99117  | -0.58589 | 3.37294  |
| C | 2.35095  | 0.40993  | 2.26318  |
| C | 2.1337   | 1.87337  | 2.66761  |
| C | 2.58182  | 2.92699  | 1.6177   |
| C | 1.63103  | 3.02216  | 0.42614  |
| C | 2.74277  | 4.31161  | 2.25788  |
| O | 1.65383  | 1.89425  | -0.3299  |
| O | 0.94789  | 3.98712  | 0.15497  |
| C | 0.83654  | 1.89767  | -1.53987 |
| C | 1.38766  | 0.82463  | -2.50661 |
| C | -0.5967  | 1.6341   | -1.1843  |
| C | 2.90098  | 0.72848  | -2.58883 |
| C | 2.52116  | -2.46037 | -1.78321 |
| C | 3.80873  | -1.60781 | -1.74515 |
| C | 3.62884  | -0.07721 | -1.52299 |
| C | 3.56337  | 1.3559   | -3.56831 |
| C | 4.65462  | -1.90685 | -2.99177 |
| O | -1.62713 | -3.63438 | 0.55699  |
| O | 0.63647  | -0.44828 | 3.78683  |

|   |          |          |          |
|---|----------|----------|----------|
| C | -1.63784 | 2.50118  | -1.10068 |
| O | -2.74644 | 1.79681  | -0.71691 |
| C | -2.31817 | 0.5014   | -0.57688 |
| N | -1.04306 | 0.36433  | -0.8422  |
| C | -3.20498 | -0.56113 | -0.15177 |
| C | -4.53892 | -0.55355 | 0.06075  |
| C | -5.44435 | 0.66107  | -0.1207  |
| C | -5.20802 | -1.81212 | 0.55483  |
| C | -5.68887 | 1.38716  | 1.20518  |
| O | -6.7262  | 0.28007  | -0.62243 |
| C | -6.72146 | -0.03118 | -2.00228 |
| H | -0.28145 | -2.92091 | 2.73312  |
| H | 0.8995   | -4.41862 | -0.6829  |
| H | -0.16641 | -3.29813 | -1.54594 |
| H | 1.05852  | -1.36681 | -0.59124 |
| H | 2.04166  | -2.68966 | 3.84478  |
| H | 3.38866  | -2.16823 | 2.80869  |
| H | 2.57628  | -0.35849 | 4.27243  |
| H | 1.75369  | 0.18157  | 1.37464  |
| H | 3.40093  | 0.2575   | 1.97701  |
| H | 2.70672  | 2.07395  | 3.58335  |
| H | 1.08163  | 2.0338   | 2.93116  |
| H | 3.55072  | 2.60236  | 1.21223  |
| H | 3.0508   | 5.05861  | 1.52076  |
| H | 3.49788  | 4.2729   | 3.05018  |
| H | 1.79888  | 4.65139  | 2.69555  |
| H | 0.93098  | 2.89264  | -1.98052 |
| H | 0.97331  | 1.06624  | -3.49271 |
| H | 0.95706  | -0.13701 | -2.22195 |
| H | 2.82608  | -3.51218 | -1.87259 |
| H | 1.94818  | -2.23651 | -2.69383 |
| H | 4.37775  | -1.94785 | -0.86958 |
| H | 3.13422  | 0.07322  | -0.56159 |
| H | 4.64035  | 0.33573  | -1.41594 |
| H | 4.64797  | 1.32471  | -3.63804 |
| H | 3.04708  | 1.92772  | -4.33647 |
| H | 4.85462  | -2.98088 | -3.08599 |
| H | 4.14909  | -1.57559 | -3.90602 |
| H | 5.62102  | -1.39106 | -2.94317 |

|   |          |          |          |
|---|----------|----------|----------|
| H | 0.07936  | -0.6266  | 3.00913  |
| H | -1.75297 | 3.56436  | -1.23457 |
| H | -2.66362 | -1.48803 | 0.01726  |
| H | -4.98448 | 1.36443  | -0.82532 |
| H | -5.96641 | -2.16512 | -0.1528  |
| H | -4.47782 | -2.60896 | 0.71844  |
| H | -5.73869 | -1.62637 | 1.49781  |
| H | -6.15456 | 0.7192   | 1.93677  |
| H | -6.36145 | 2.23453  | 1.03912  |
| H | -4.74528 | 1.75735  | 1.617    |
| H | -6.07424 | -0.89008 | -2.23627 |
| H | -7.7506  | -0.27889 | -2.27596 |
| H | -6.38702 | 0.82648  | -2.60751 |

**Compound 1b:** Isomer 2S, 5R, 11S, 13S, 17S, 23S conformer 21

|   |          |          |          |
|---|----------|----------|----------|
| C | -4.67497 | 0.3207   | -1.17096 |
| C | -5.77745 | -0.12428 | -1.8259  |
| C | -6.42225 | -1.38791 | -1.48305 |
| C | -5.77763 | -2.11453 | -0.30299 |
| C | -4.27519 | -1.85294 | -0.2523  |
| O | -4.00047 | -0.42144 | -0.25801 |
| C | -4.08365 | 1.68715  | -1.37135 |
| C | -4.14789 | 2.59368  | -0.11591 |
| C | -2.86976 | 2.59166  | 0.74333  |
| C | -1.65096 | 3.23178  | 0.06177  |
| C | -0.41607 | 3.36848  | 0.97933  |
| C | 0.02939  | 2.00763  | 1.49587  |
| C | 0.73639  | 4.09559  | 0.26377  |
| O | 0.43631  | 1.20691  | 0.48282  |
| O | 0.00271  | 1.66239  | 2.66026  |
| C | 0.7831   | -0.17117 | 0.8378   |
| C | 0.45431  | -1.02458 | -0.39981 |
| C | 2.21696  | -0.23813 | 1.2711   |
| C | 0.1896   | -2.48668 | -0.07008 |
| C | -3.6028  | -2.45474 | 0.97834  |
| C | -2.08636 | -2.21822 | 1.12963  |
| C | -1.26523 | -2.90678 | 0.01051  |
| C | 1.19056  | -3.35582 | 0.10624  |



|   |          |          |          |
|---|----------|----------|----------|
| C | -1.6288  | -2.69009 | 2.51817  |
| O | -7.42648 | -1.81377 | -2.03757 |
| O | -4.44269 | 3.9052   | -0.60946 |
| C | 2.71639  | -0.13045 | 2.53131  |
| O | 4.07525  | -0.22182 | 2.46018  |
| C | 4.35217  | -0.37923 | 1.12499  |
| N | 3.2739   | -0.40139 | 0.38484  |
| C | 5.75673  | -0.5031  | 0.79043  |
| C | 6.32035  | -0.4975  | -0.43645 |
| C | 5.5289   | -0.35962 | -1.73192 |
| C | 7.81085  | -0.66603 | -0.58121 |
| C | 5.23761  | -1.72382 | -2.36243 |
| O | 6.25787  | 0.39744  | -2.70029 |
| C | 6.22669  | 1.79209  | -2.46507 |
| H | -6.25027 | 0.50144  | -2.57423 |
| H | -6.25253 | -1.75876 | 0.62312  |
| H | -5.9805  | -3.18656 | -0.38562 |
| H | -3.82339 | -2.24333 | -1.17558 |
| H | -3.04771 | 1.58732  | -1.71694 |
| H | -4.64706 | 2.19188  | -2.15965 |
| H | -4.98283 | 2.2469   | 0.51315  |
| H | -2.65639 | 1.55806  | 1.04245  |
| H | -3.08501 | 3.13729  | 1.67503  |
| H | -1.92711 | 4.23063  | -0.29474 |
| H | -1.3602  | 2.65587  | -0.82464 |
| H | -0.69661 | 3.93284  | 1.87605  |
| H | 1.60345  | 4.21373  | 0.92296  |
| H | 0.41224  | 5.09377  | -0.05049 |
| H | 1.05651  | 3.54191  | -0.62404 |
| H | 0.15192  | -0.44291 | 1.68447  |
| H | 1.27718  | -0.93204 | -1.11418 |
| H | -0.43518 | -0.58408 | -0.86308 |
| H | -4.1111  | -2.05636 | 1.86679  |
| H | -3.80628 | -3.53521 | 0.96432  |
| H | -1.92574 | -1.13517 | 1.06128  |
| H | -1.32859 | -3.99551 | 0.14121  |
| H | -1.72718 | -2.68184 | -0.96201 |
| H | 1.00251  | -4.40006 | 0.34487  |
| H | 2.23029  | -3.05459 | 0.01123  |

|   |          |          |          |
|---|----------|----------|----------|
| H | -2.13599 | -2.13319 | 3.31432  |
| H | -1.85201 | -3.75582 | 2.65941  |
| H | -0.54942 | -2.56282 | 2.64955  |
| H | -4.5279  | 4.49425  | 0.15737  |
| H | 2.27858  | 0.02038  | 3.50455  |
| H | 6.39722  | -0.60998 | 1.66267  |
| H | 4.5731   | 0.13594  | -1.52244 |
| H | 8.2921   | -0.82121 | 0.38874  |
| H | 8.04628  | -1.52341 | -1.22466 |
| H | 8.26489  | 0.2065   | -1.06341 |
| H | 4.6254   | -2.32939 | -1.68798 |
| H | 6.1648   | -2.2633  | -2.58243 |
| H | 4.69461  | -1.58099 | -3.30183 |
| H | 6.78337  | 2.2645   | -3.27904 |
| H | 5.19535  | 2.17778  | -2.46506 |
| H | 6.69595  | 2.0673   | -1.5077  |

**Compound 1b:** Isomer 2S, 5R, 11S, 13S, 17S, 23S conformer 22

|   |          |          |          |
|---|----------|----------|----------|
| C | 0.43668  | 2.33816  | -1.28348 |
| C | -0.1082  | 3.56324  | -1.48873 |
| C | 0.38289  | 4.7485   | -0.78982 |
| C | 1.60612  | 4.5047   | 0.10022  |
| C | 1.61686  | 3.09249  | 0.68017  |
| O | 1.40845  | 2.10916  | -0.36823 |
| C | 0.04342  | 1.06597  | -1.98907 |
| C | 1.24681  | 0.17385  | -2.35913 |
| C | 0.81632  | -1.22332 | -2.80493 |
| C | 1.97729  | -2.22538 | -2.9319  |
| C | 2.83136  | -2.46872 | -1.65467 |
| C | 1.95545  | -2.91559 | -0.49121 |
| C | 3.92273  | -3.51279 | -1.9247  |
| O | 1.47942  | -1.85775 | 0.21057  |
| O | 1.68563  | -4.06981 | -0.22477 |
| C | 0.5424   | -2.14314 | 1.30132  |
| C | 0.50595  | -0.88306 | 2.1676   |
| C | -0.81585 | -2.49103 | 0.75252  |
| C | 1.73587  | -0.58146 | 3.01485  |
| C | 2.92778  | 2.71591  | 1.37354  |

|   |          |          |          |
|---|----------|----------|----------|
| C | 3.05348  | 1.23658  | 1.79903  |
| C | 2.16258  | 0.87395  | 3.02179  |
| C | 2.36725  | -1.511   | 3.73899  |
| C | 4.52025  | 0.88251  | 2.08174  |
| O | -0.08932 | 5.86752  | -0.93722 |
| O | 2.01649  | 0.74076  | -3.42319 |
| C | -1.26703 | -3.68933 | 0.29104  |
| O | -2.566   | -3.53431 | -0.09439 |
| C | -2.8621  | -2.21878 | 0.1572   |
| N | -1.84765 | -1.5623  | 0.65949  |
| C | -4.221   | -1.82132 | -0.15275 |
| C | -4.81339 | -0.62778 | 0.06609  |
| C | -4.12385 | 0.55124  | 0.74494  |
| C | -6.26131 | -0.42887 | -0.29934 |
| C | -4.33539 | 0.50932  | 2.26197  |
| O | -4.65163 | 1.79537  | 0.2876   |
| C | -4.11854 | 2.2157   | -0.95389 |
| H | -0.89548 | 3.69217  | -2.22306 |
| H | 2.50503  | 4.66285  | -0.51398 |
| H | 1.62215  | 5.25292  | 0.89836  |
| H | 0.76339  | 2.98203  | 1.36524  |
| H | -0.60248 | 0.49829  | -1.30324 |
| H | -0.54108 | 1.3022   | -2.8842  |
| H | 1.86454  | 0.07841  | -1.46201 |
| H | 0.31759  | -1.13927 | -3.77949 |
| H | 0.06956  | -1.60178 | -2.09833 |
| H | 2.66168  | -1.87882 | -3.71438 |
| H | 1.575    | -3.1914  | -3.26365 |
| H | 3.3009   | -1.52222 | -1.3665  |
| H | 4.57298  | -3.6448  | -1.05337 |
| H | 4.54431  | -3.19951 | -2.77026 |
| H | 3.47782  | -4.48434 | -2.15874 |
| H | 0.94004  | -3.00317 | 1.84377  |
| H | -0.36753 | -0.95834 | 2.82805  |
| H | 0.29312  | -0.0398  | 1.50324  |
| H | 3.74758  | 2.95357  | 0.6819   |
| H | 3.05462  | 3.37625  | 2.24304  |
| H | 2.72364  | 0.62567  | 0.95205  |
| H | 2.70856  | 1.10855  | 3.94445  |

|   |          |          |          |
|---|----------|----------|----------|
| H | 1.26091  | 1.50207  | 3.02871  |
| H | 3.20754  | -1.25693 | 4.37995  |
| H | 2.07248  | -2.55775 | 3.73312  |
| H | 5.1429   | 1.0262   | 1.19073  |
| H | 4.93234  | 1.5102   | 2.88299  |
| H | 4.61443  | -0.16361 | 2.39164  |
| H | 2.45852  | 1.53215  | -3.07865 |
| H | -0.8221  | -4.66187 | 0.1637   |
| H | -4.80807 | -2.62467 | -0.59109 |
| H | -3.04654 | 0.51063  | 0.54455  |
| H | -6.70777 | -1.35174 | -0.68075 |
| H | -6.84087 | -0.0942  | 0.57013  |
| H | -6.37675 | 0.35432  | -1.05688 |
| H | -5.40174 | 0.52974  | 2.51056  |
| H | -3.8617  | 1.38387  | 2.7187   |
| H | -3.89052 | -0.39729 | 2.68219  |
| H | -3.02885 | 2.36124  | -0.89449 |
| H | -4.33026 | 1.50106  | -1.76479 |
| H | -4.58973 | 3.17227  | -1.19496 |

**Compound 1b:** Isomer 2S, 5R, 11S, 13S, 17S, 23S conformer 23

|   |          |          |          |
|---|----------|----------|----------|
| C | -1.68796 | -2.1051  | -1.93937 |
| C | -0.40109 | -2.51587 | -2.08292 |
| C | 0.30374  | -3.21837 | -1.01842 |
| C | -0.54775 | -3.50016 | 0.21695  |
| C | -1.57946 | -2.39413 | 0.42001  |
| O | -2.38421 | -2.22713 | -0.78584 |
| C | -2.48977 | -1.4333  | -3.01447 |
| C | -2.77909 | 0.06653  | -2.74655 |
| C | -1.50164 | 0.91728  | -2.64358 |
| C | -1.76057 | 2.42952  | -2.53207 |
| C | -2.44332 | 2.92523  | -1.2292  |
| C | -1.47061 | 2.903    | -0.05639 |
| C | -2.98968 | 4.34856  | -1.41156 |
| O | -1.47523 | 1.70381  | 0.58     |
| O | -0.77282 | 3.83548  | 0.28406  |
| C | -0.63578 | 1.59254  | 1.77082  |
| C | -1.1993  | 0.4666   | 2.66639  |

|   |          |          |          |
|---|----------|----------|----------|
| C | 0.78162  | 1.3237   | 1.36367  |
| C | -2.71195 | 0.43238  | 2.80099  |
| C | -2.51047 | -2.65056 | 1.60428  |
| C | -3.76077 | -1.75528 | 1.74745  |
| C | -3.52419 | -0.21807 | 1.69098  |
| C | -3.30333 | 0.9837   | 3.868    |
| C | -4.54689 | -2.17028 | 2.99922  |
| O | 1.4701   | -3.59089 | -1.10619 |
| O | -3.67083 | 0.55946  | -3.74745 |
| C | 1.8486   | 2.16243  | 1.35341  |
| O | 2.92646  | 1.47076  | 0.86977  |
| C | 2.45134  | 0.2123   | 0.59556  |
| N | 1.17839  | 0.0862   | 0.87513  |
| C | 3.29646  | -0.81945 | 0.03447  |
| C | 4.62489  | -0.81944 | -0.20818 |
| C | 5.54605  | 0.35858  | 0.06514  |
| C | 5.26066  | -2.03696 | -0.82808 |
| C | 5.61102  | 1.3012   | -1.14966 |
| O | 6.83497  | -0.17581 | 0.37884  |
| C | 7.67364  | 0.7072   | 1.09216  |
| H | 0.11754  | -2.35832 | -3.02198 |
| H | -1.05091 | -4.46906 | 0.08163  |
| H | 0.1054   | -3.58361 | 1.09057  |
| H | -1.03926 | -1.44821 | 0.53586  |
| H | -1.9619  | -1.5343  | -3.97082 |
| H | -3.45876 | -1.93731 | -3.11193 |
| H | -3.35014 | 0.13984  | -1.81631 |
| H | -0.89681 | 0.73971  | -3.54704 |
| H | -0.89652 | 0.56142  | -1.80212 |
| H | -2.40539 | 2.7299   | -3.36537 |
| H | -0.8131  | 2.96989  | -2.65472 |
| H | -3.27096 | 2.25033  | -0.98585 |
| H | -3.47672 | 4.709    | -0.49953 |
| H | -3.72457 | 4.36594  | -2.22299 |
| H | -2.18159 | 5.04554  | -1.653   |
| H | -0.69516 | 2.55334  | 2.28683  |
| H | -0.74045 | 0.60953  | 3.65208  |
| H | -0.82138 | -0.48589 | 2.29045  |
| H | -2.85521 | -3.69267 | 1.55215  |

|   |          |          |          |
|---|----------|----------|----------|
| H | -1.89344 | -2.58462 | 2.51136  |
| H | -4.39086 | -1.96706 | 0.87352  |
| H | -3.06558 | 0.01975  | 0.72869  |
| H | -4.51947 | 0.2447   | 1.68239  |
| H | -4.38478 | 0.99741  | 3.98007  |
| H | -2.72991 | 1.44533  | 4.66913  |
| H | -4.78318 | -3.24092 | 2.97993  |
| H | -3.97818 | -1.96618 | 3.91361  |
| H | -5.49343 | -1.62131 | 3.06866  |
| H | -3.19339 | 0.55026  | -4.59373 |
| H | 2.00204  | 3.19959  | 1.60327  |
| H | 2.72784  | -1.70977 | -0.21921 |
| H | 5.1769   | 0.92353  | 0.93043  |
| H | 5.79924  | -1.77396 | -1.7479  |
| H | 6.00724  | -2.46561 | -0.15105 |
| H | 4.50949  | -2.79454 | -1.06614 |
| H | 5.95539  | 0.75989  | -2.03695 |
| H | 6.30211  | 2.13074  | -0.96496 |
| H | 4.62375  | 1.7247   | -1.35618 |
| H | 7.20059  | 1.05099  | 2.02623  |
| H | 8.58017  | 0.14847  | 1.34078  |
| H | 7.96059  | 1.59215  | 0.50426  |

**Compound 1b:** Isomer 2S, 5R, 11S, 13S, 17S, 23S conformer 27

|   |          |          |          |
|---|----------|----------|----------|
| C | 0.38974  | 2.33013  | -1.2863  |
| C | -0.14154 | 3.56238  | -1.48836 |
| C | 0.39069  | 4.74661  | -0.81843 |
| C | 1.64257  | 4.49282  | 0.0277   |
| C | 1.64831  | 3.08841  | 0.62628  |
| O | 1.38596  | 2.0953   | -0.39979 |
| C | -0.04651 | 1.05674  | -1.96289 |
| C | 1.13207  | 0.15689  | -2.39197 |
| C | 0.67656  | -1.25196 | -2.77183 |
| C | 1.82849  | -2.25737 | -2.9424  |
| C | 2.74542  | -2.48408 | -1.70608 |
| C | 1.92973  | -2.92635 | -0.49784 |
| C | 3.82982  | -3.52306 | -2.01998 |
| O | 1.46549  | -1.86458 | 0.20735  |

|   |          |          |          |
|---|----------|----------|----------|
| O | 1.69248  | -4.08009 | -0.20117 |
| C | 0.56824  | -2.15004 | 1.33113  |
| C | 0.53895  | -0.88054 | 2.18446  |
| C | -0.79832 | -2.52757 | 0.82837  |
| C | 1.78452  | -0.56292 | 3.00345  |
| C | 2.97453  | 2.69644  | 1.28049  |
| C | 3.08715  | 1.22037  | 1.72019  |
| C | 2.22107  | 0.88889  | 2.96886  |
| C | 2.42105  | -1.47868 | 3.74066  |
| C | 4.55463  | 0.84641  | 1.97146  |
| O | -0.07329 | 5.87056  | -0.95585 |
| O | 1.8247   | 0.69733  | -3.52075 |
| C | -1.25735 | -3.75476 | 0.46271  |
| O | -2.55927 | -3.62465 | 0.07913  |
| C | -2.84817 | -2.29187 | 0.23078  |
| N | -1.82725 | -1.60288 | 0.67442  |
| C | -4.20443 | -1.91408 | -0.10923 |
| C | -4.78389 | -0.69794 | -0.02116 |
| C | -4.07522 | 0.52829  | 0.52759  |
| C | -6.22246 | -0.518   | -0.42595 |
| C | -4.19292 | 0.57457  | 2.06206  |
| O | -4.67166 | 1.66996  | -0.08849 |
| C | -3.91737 | 2.86009  | 0.02483  |
| H | -0.9513  | 3.69519  | -2.19714 |
| H | 2.5205   | 4.62563  | -0.62178 |
| H | 1.70242  | 5.25103  | 0.81428  |
| H | 0.81698  | 3.00337  | 1.34174  |
| H | -0.65655 | 0.49615  | -1.23965 |
| H | -0.67768 | 1.28971  | -2.82642 |
| H | 1.81104  | 0.08653  | -1.53733 |
| H | 0.11918  | -1.19317 | -3.7159  |
| H | -0.02472 | -1.60997 | -2.01062 |
| H | 2.47274  | -1.92351 | -3.76365 |
| H | 1.40956  | -3.22763 | -3.23942 |
| H | 3.22182  | -1.53205 | -1.44862 |
| H | 4.52127  | -3.64473 | -1.17941 |
| H | 4.40852  | -3.21204 | -2.89624 |
| H | 3.38106  | -4.49922 | -2.22577 |
| H | 0.99563  | -2.99667 | 1.87182  |

|   |          |          |          |
|---|----------|----------|----------|
| H | -0.31956 | -0.9577  | 2.86428  |
| H | 0.3053   | -0.04608 | 1.51614  |
| H | 3.77546  | 2.91081  | 0.55979  |
| H | 3.14162  | 3.36418  | 2.1375   |
| H | 2.72649  | 0.60456  | 0.8894   |
| H | 2.78849  | 1.13941  | 3.87432  |
| H | 1.32355  | 1.52288  | 2.98174  |
| H | 3.27425  | -1.21534 | 4.36045  |
| H | 2.11807  | -2.52282 | 3.76641  |
| H | 5.15732  | 0.97023  | 1.06392  |
| H | 4.99585  | 1.47661  | 2.75508  |
| H | 4.64003  | -0.19745 | 2.29122  |
| H | 2.27176  | 1.50865  | -3.23378 |
| H | -0.81597 | -4.73547 | 0.40225  |
| H | -4.80055 | -2.74918 | -0.46786 |
| H | -3.0104  | 0.48404  | 0.26355  |
| H | -6.67067 | -1.46565 | -0.73814 |
| H | -6.81498 | -0.10501 | 0.40046  |
| H | -6.30103 | 0.20414  | -1.24526 |
| H | -5.24427 | 0.58871  | 2.36872  |
| H | -3.70652 | 1.46951  | 2.46419  |
| H | -3.70486 | -0.29952 | 2.50239  |
| H | -3.87888 | 3.24147  | 1.05573  |
| H | -2.88484 | 2.72409  | -0.33294 |
| H | -4.41262 | 3.60703  | -0.60128 |

**Compound 1b:** Isomer 2S, 5R, 11S, 13S, 17S, 23S conformer 28

|   |          |          |          |
|---|----------|----------|----------|
| C | 2.92299  | -2.16422 | -0.65628 |
| C | 3.92555  | -2.81814 | -1.2965  |
| C | 5.27679  | -2.2721  | -1.37443 |
| C | 5.46152  | -0.94772 | -0.63318 |
| C | 4.17821  | -0.12104 | -0.63971 |
| O | 3.056    | -0.91139 | -0.15556 |
| C | 1.55044  | -2.73739 | -0.44529 |
| C | 1.19181  | -3.12413 | 1.00622  |
| C | 1.06116  | -1.96031 | 2.00439  |
| C | -0.02102 | -0.93103 | 1.64909  |
| C | -0.02467 | 0.31043  | 2.57641  |



|   |          |          |          |
|---|----------|----------|----------|
| C | -0.7326  | 1.48983  | 1.91029  |
| C | -0.61951 | 0.04258  | 3.96219  |
| O | -0.20127 | 1.7257   | 0.68223  |
| O | -1.62186 | 2.1546   | 2.39203  |
| C | -0.7916  | 2.74977  | -0.14467 |
| C | 0.14614  | 2.90688  | -1.36105 |
| C | -2.18992 | 2.37202  | -0.55214 |
| C | 1.48058  | 3.59579  | -1.09017 |
| C | 4.26522  | 1.12695  | 0.2348   |
| C | 3.00546  | 2.01543  | 0.31224  |
| C | 2.74922  | 2.76341  | -1.02206 |
| C | 1.52514  | 4.92919  | -0.98009 |
| C | 3.14699  | 2.99775  | 1.48392  |
| O | 6.20872  | -2.838   | -1.93031 |
| O | -0.03426 | -3.84986 | 0.8739   |
| C | -3.25442 | 3.19059  | -0.75937 |
| O | -4.30296 | 2.42459  | -1.18245 |
| C | -3.82075 | 1.14207  | -1.19586 |
| N | -2.56116 | 1.06878  | -0.84817 |
| C | -4.77802 | 0.12348  | -1.58587 |
| C | -4.72503 | -1.20189 | -1.33742 |
| C | -3.60763 | -1.8722  | -0.54813 |
| C | -5.82322 | -2.10575 | -1.83652 |
| C | -2.6603  | -2.67661 | -1.43897 |
| O | -4.14928 | -2.78725 | 0.41158  |
| C | -4.74986 | -2.14982 | 1.52281  |
| H | 3.74945  | -3.80247 | -1.71537 |
| H | 5.75483  | -1.17332 | 0.40272  |
| H | 6.28369  | -0.39065 | -1.09235 |
| H | 3.93137  | 0.13969  | -1.67941 |
| H | 0.80269  | -2.03079 | -0.82248 |
| H | 1.46171  | -3.65084 | -1.03984 |
| H | 1.98212  | -3.79873 | 1.37546  |
| H | 2.03439  | -1.46064 | 2.07769  |
| H | 0.86492  | -2.39546 | 2.99621  |
| H | -1.01082 | -1.40361 | 1.67104  |
| H | 0.13552  | -0.58958 | 0.62454  |
| H | 1.02155  | 0.63326  | 2.69176  |
| H | -0.58998 | 0.94015  | 4.58614  |

|   |          |          |          |
|---|----------|----------|----------|
| H | -0.06539 | -0.75087 | 4.47433  |
| H | -1.66743 | -0.2659  | 3.88048  |
| H | -0.82876 | 3.68431  | 0.42478  |
| H | -0.4065  | 3.49382  | -2.10321 |
| H | 0.29303  | 1.91096  | -1.79449 |
| H | 4.5259   | 0.79601  | 1.24942  |
| H | 5.11778  | 1.72274  | -0.12213 |
| H | 2.14711  | 1.36828  | 0.51058  |
| H | 3.60905  | 3.41961  | -1.21553 |
| H | 2.72585  | 2.03218  | -1.84228 |
| H | 2.45755  | 5.45986  | -0.80543 |
| H | 0.63118  | 5.54444  | -1.0629  |
| H | 3.2767   | 2.46153  | 2.43181  |
| H | 4.0212   | 3.64964  | 1.35123  |
| H | 2.26641  | 3.63993  | 1.5754   |
| H | -0.36192 | -4.05729 | 1.76306  |
| H | -3.43497 | 4.24884  | -0.65738 |
| H | -5.63763 | 0.52334  | -2.11943 |
| H | -3.02503 | -1.10326 | -0.02683 |
| H | -6.60666 | -1.5418  | -2.35099 |
| H | -5.42603 | -2.85323 | -2.53578 |
| H | -6.27217 | -2.66855 | -1.01134 |
| H | -1.88949 | -3.14222 | -0.81767 |
| H | -2.18278 | -2.01614 | -2.16999 |
| H | -3.19723 | -3.46633 | -1.97503 |
| H | -5.07574 | -2.94029 | 2.20474  |
| H | -4.03656 | -1.49436 | 2.04742  |
| H | -5.62358 | -1.54362 | 1.23893  |

**Compound 1b:** Isomer 2S, 5R, 11S, 13S, 17S, 23S conformer 32

|   |          |         |          |
|---|----------|---------|----------|
| C | -0.44416 | 2.35696 | 1.25478  |
| C | 0.08458  | 3.59268 | 1.43546  |
| C | -0.43793 | 4.75886 | 0.73062  |
| C | -1.67674 | 4.47974 | -0.12614 |
| C | -1.66457 | 3.06499 | -0.69972 |
| O | -1.40566 | 2.0895  | 0.34286  |
| C | -0.01282 | 1.10579 | 1.97479  |
| C | -1.18551 | 0.22024 | 2.41671  |

|   |          |          |          |
|---|----------|----------|----------|
| C | -0.73517 | -1.20252 | 2.78148  |
| C | -1.8874  | -2.20978 | 2.94673  |
| C | -2.7792  | -2.45685 | 1.69565  |
| C | -1.92838 | -2.91601 | 0.51702  |
| C | -3.86797 | -3.49443 | 1.99822  |
| O | -1.46902 | -1.8658  | -0.20227 |
| O | -1.66569 | -4.07406 | 0.26101  |
| C | -0.54284 | -2.15956 | -1.30258 |
| C | -0.52125 | -0.90851 | -2.18185 |
| C | 0.82122  | -2.49663 | -0.76324 |
| C | -1.76336 | -0.62313 | -3.01719 |
| C | -2.98356 | 2.65611  | -1.35934 |
| C | -3.08724 | 1.17315  | -1.77606 |
| C | -2.21421 | 0.82453  | -3.01535 |
| C | -2.38474 | -1.56166 | -3.73851 |
| C | -4.55149 | 0.78691  | -2.02808 |
| O | 0.01824  | 5.88847  | 0.84933  |
| O | -1.80458 | 0.88408  | 3.52526  |
| C | 1.2872   | -3.6929  | -0.31172 |
| O | 2.58508  | -3.52574 | 0.07201  |
| C | 2.86526  | -2.20458 | -0.17046 |
| N | 1.84213  | -1.5565  | -0.66575 |
| C | 4.21908  | -1.79277 | 0.14273  |
| C | 4.79959  | -0.59343 | -0.07673 |
| C | 4.10212  | 0.576    | -0.76448 |
| C | 6.24312  | -0.37787 | 0.29608  |
| C | 4.31442  | 0.52226  | -2.28122 |
| O | 4.62269  | 1.82652  | -0.31781 |
| C | 4.07734  | 2.26179  | 0.91364  |
| H | 0.87147  | 3.74568  | 2.16541  |
| H | -2.56207 | 4.61512  | 0.51223  |
| H | -1.73345 | 5.22253  | -0.92754 |
| H | -0.8267  | 2.97534  | -1.40726 |
| H | 0.61305  | 0.52436  | 1.28362  |
| H | 0.59998  | 1.37011  | 2.84273  |
| H | -1.88667 | 0.16856  | 1.57791  |
| H | -0.17113 | -1.15294 | 3.72181  |
| H | -0.04342 | -1.56706 | 2.01424  |
| H | -2.54988 | -1.88373 | 3.76129  |

|   |          |          |          |
|---|----------|----------|----------|
| H | -1.4729  | -3.17462 | 3.26538  |
| H | -3.24998 | -1.51141 | 1.40423  |
| H | -4.53804 | -3.62927 | 1.14271  |
| H | -4.47044 | -3.17572 | 2.85587  |
| H | -3.42072 | -4.46591 | 2.22756  |
| H | -0.94444 | -3.02644 | -1.83082 |
| H | 0.34471  | -0.98871 | -2.85154 |
| H | -0.30441 | -0.05772 | -1.52871 |
| H | -3.79047 | 2.87797  | -0.64792 |
| H | -3.1468  | 3.30924  | -2.22834 |
| H | -2.72706 | 0.57382  | -0.93316 |
| H | -2.78102 | 1.04975  | -3.9278  |
| H | -1.3232  | 1.46717  | -3.0385  |
| H | -3.23582 | -1.32079 | -4.37024 |
| H | -2.07028 | -2.60281 | -3.73983 |
| H | -5.15916 | 0.92238  | -1.12548 |
| H | -4.9925  | 1.40254  | -2.8233  |
| H | -4.63041 | -0.26227 | -2.33237 |
| H | -2.68123 | 0.49334  | 3.6573   |
| H | 0.85418  | -4.67166 | -0.19049 |
| H | 4.81302  | -2.58899 | 0.58476  |
| H | 3.0251   | 0.53021  | -0.56388 |
| H | 6.69818  | -1.29521 | 0.68069  |
| H | 6.82321  | -0.03655 | -0.57038 |
| H | 6.34482  | 0.40719  | 1.05365  |
| H | 5.3808   | 0.54827  | -2.52924 |
| H | 3.83475  | 1.3896   | -2.7453  |
| H | 3.8764   | -0.39101 | -2.69413 |
| H | 2.98873  | 2.40807  | 0.84154  |
| H | 4.28084  | 1.55645  | 1.73481  |
| H | 4.54714  | 3.22065  | 1.14811  |

**Compound 1b:** Isomer 2S, 5R, 11S, 13S, 17S, 23S conformer 37

|   |          |          |          |
|---|----------|----------|----------|
| C | 1.70988  | -2.55687 | 1.65043  |
| C | 0.41912  | -2.99071 | 1.65189  |
| C | -0.25594 | -3.39867 | 0.42664  |
| C | 0.63346  | -3.38097 | -0.81296 |
| C | 1.67855  | -2.27102 | -0.71992 |

|   |          |          |          |
|---|----------|----------|----------|
| O | 2.4356   | -2.38176 | 0.52397  |
| C | 2.44252  | -2.13239 | 2.89194  |
| C | 2.04778  | -0.69488 | 3.34869  |
| C | 2.35555  | 0.37229  | 2.29062  |
| C | 2.06138  | 1.80086  | 2.76475  |
| C | 2.45484  | 2.92441  | 1.76676  |
| C | 1.50212  | 3.02795  | 0.57717  |
| C | 2.54478  | 4.28393  | 2.47137  |
| O | 1.58329  | 1.94077  | -0.23253 |
| O | 0.77249  | 3.9699   | 0.34945  |
| C | 0.7772   | 1.96776  | -1.44978 |
| C | 1.38891  | 0.9751   | -2.46461 |
| C | -0.64496 | 1.61594  | -1.1284  |
| C | 2.90564  | 0.96142  | -2.53878 |
| C | 2.65433  | -2.28005 | -1.89608 |
| C | 3.90625  | -1.37864 | -1.81875 |
| C | 3.6689   | 0.13102  | -1.51817 |
| C | 3.53983  | 1.68216  | -3.47161 |
| C | 4.75604  | -1.57929 | -3.08234 |
| O | -1.42695 | -3.76353 | 0.38452  |
| O | 0.68911  | -0.64579 | 3.76928  |
| C | -1.73104 | 2.42349  | -1.02641 |
| O | -2.80965 | 1.64457  | -0.70408 |
| C | -2.31676 | 0.36674  | -0.61808 |
| N | -1.03088 | 0.30929  | -0.85947 |
| C | -3.16024 | -0.75868 | -0.27854 |
| C | -4.49817 | -0.82469 | -0.10675 |
| C | -5.43661 | 0.3653   | -0.22336 |
| C | -5.12827 | -2.14271 | 0.26284  |
| C | -5.587   | 1.08528  | 1.1285   |
| O | -6.6939  | -0.13124 | -0.69064 |
| C | -7.51825 | 0.84618  | -1.28835 |
| H | -0.10927 | -3.10103 | 2.59251  |
| H | 1.12646  | -4.36062 | -0.89931 |
| H | 0.0088   | -3.24459 | -1.70056 |
| H | 1.14882  | -1.31425 | -0.64801 |
| H | 2.20502  | -2.81466 | 3.71382  |
| H | 3.5208   | -2.17482 | 2.70431  |
| H | 2.62315  | -0.48392 | 4.25845  |

|   |          |          |          |
|---|----------|----------|----------|
| H | 1.77258  | 0.15847  | 1.38917  |
| H | 3.41246  | 0.28924  | 2.00147  |
| H | 2.62247  | 1.98776  | 3.69074  |
| H | 1.00216  | 1.89296  | 3.03234  |
| H | 3.43933  | 2.66908  | 1.3493   |
| H | 2.81768  | 5.07866  | 1.77123  |
| H | 3.29843  | 4.2457   | 3.26507  |
| H | 1.58377  | 4.55605  | 2.91896  |
| H | 0.82656  | 2.98794  | -1.83686 |
| H | 0.9687   | 1.24555  | -3.4407  |
| H | 1.00599  | -0.02022 | -2.23302 |
| H | 3.00316  | -3.31215 | -2.0394  |
| H | 2.06846  | -2.03575 | -2.7931  |
| H | 4.4932   | -1.73987 | -0.96371 |
| H | 3.17447  | 0.21476  | -0.54818 |
| H | 4.66468  | 0.57619  | -1.39475 |
| H | 4.62497  | 1.71231  | -3.53353 |
| H | 2.99841  | 2.27342  | -4.20709 |
| H | 4.99307  | -2.63885 | -3.23575 |
| H | 4.23465  | -1.21675 | -3.97563 |
| H | 5.70411  | -1.03324 | -3.00902 |
| H | 0.13925  | -0.81668 | 2.98474  |
| H | -1.89889 | 3.48466  | -1.11163 |
| H | -2.58341 | -1.67113 | -0.15677 |
| H | -5.04185 | 1.0764   | -0.9601  |
| H | -5.83613 | -2.4581  | -0.51105 |
| H | -4.3693  | -2.91764 | 0.39796  |
| H | -5.71004 | -2.05374 | 1.18966  |
| H | -5.95691 | 0.39327  | 1.89205  |
| H | -6.2935  | 1.91865  | 1.05025  |
| H | -4.62419 | 1.48898  | 1.45518  |
| H | -7.01039 | 1.34701  | -2.12846 |
| H | -8.40009 | 0.32404  | -1.6697  |
| H | -7.85033 | 1.61696  | -0.57664 |

**Compound 1b:** Isomer 2S, 5R, 11S, 13S, 17S, 23S conformer 42

|   |         |          |         |
|---|---------|----------|---------|
| C | 1.55529 | -2.22485 | 0.98573 |
| C | 1.40653 | -3.56401 | 0.82897 |

|   |          |          |          |
|---|----------|----------|----------|
| C | 2.11474  | -4.29077 | -0.22214 |
| C | 3.07546  | -3.43073 | -1.04976 |
| C | 2.56121  | -2.00072 | -1.18289 |
| O | 2.25426  | -1.45253 | 0.12638  |
| C | 0.96037  | -1.38926 | 2.08364  |
| C | 2.01439  | -0.54969 | 2.84178  |
| C | 1.4012   | 0.58565  | 3.68029  |
| C | 0.67858  | 1.68859  | 2.88542  |
| C | 1.60473  | 2.5447   | 1.9703   |
| C | 0.75951  | 3.11402  | 0.83955  |
| C | 2.32237  | 3.65648  | 2.74078  |
| O | 0.53552  | 2.16611  | -0.10467 |
| O | 0.30055  | 4.23604  | 0.79232  |
| C | -0.44079 | 2.48542  | -1.14624 |
| C | -0.17143 | 1.52655  | -2.30922 |
| C | -1.82417 | 2.33094  | -0.58514 |
| C | 1.11968  | 1.75627  | -3.08901 |
| C | 3.54116  | -1.02386 | -1.8278  |
| C | 3.00455  | 0.42016  | -1.95822 |
| C | 2.06988  | 0.57912  | -3.18919 |
| C | 1.37094  | 2.9213   | -3.69603 |
| C | 4.16148  | 1.42652  | -2.0227  |
| O | 2.00669  | -5.49598 | -0.40619 |
| O | 2.85035  | -1.38192 | 3.64287  |
| C | -2.62832 | 3.27799  | -0.03325 |
| O | -3.7844  | 2.67318  | 0.36644  |
| C | -3.62794 | 1.34962  | 0.03665  |
| N | -2.47721 | 1.10472  | -0.53545 |
| C | -4.74216 | 0.48781  | 0.37191  |
| C | -4.83714 | -0.84888 | 0.20598  |
| C | -3.74782 | -1.68912 | -0.43761 |
| C | -6.08839 | -1.57411 | 0.62341  |
| C | -3.91891 | -1.7106  | -1.96736 |
| O | -3.83519 | -2.99773 | 0.12877  |
| C | -2.69097 | -3.80187 | -0.07783 |
| H | 0.80782  | -4.13306 | 1.53139  |
| H | 4.05267  | -3.43011 | -0.54519 |
| H | 3.21108  | -3.89029 | -2.03335 |
| H | 1.60708  | -2.01607 | -1.73202 |

|   |          |          |          |
|---|----------|----------|----------|
| H | 0.22932  | -0.71704 | 1.61681  |
| H | 0.41644  | -2.02931 | 2.78877  |
| H | 2.69806  | -0.12224 | 2.10438  |
| H | 2.21579  | 1.01789  | 4.2745   |
| H | 0.68949  | 0.15211  | 4.40015  |
| H | 0.17525  | 2.36406  | 3.58859  |
| H | -0.11576 | 1.23836  | 2.27988  |
| H | 2.34143  | 1.88313  | 1.50139  |
| H | 3.02948  | 4.19254  | 2.09939  |
| H | 2.88078  | 3.24142  | 3.58646  |
| H | 1.60013  | 4.3847   | 3.12179  |
| H | -0.27961 | 3.52524  | -1.43757 |
| H | -1.02353 | 1.60793  | -2.99602 |
| H | -0.20846 | 0.50816  | -1.91093 |
| H | 4.45278  | -1.02354 | -1.21592 |
| H | 3.82645  | -1.41556 | -2.81419 |
| H | 2.42     | 0.63749  | -1.05791 |
| H | 2.69108  | 0.67448  | -4.08963 |
| H | 1.47658  | -0.33722 | -3.31905 |
| H | 2.26967  | 3.07402  | -4.28789 |
| H | 0.6896   | 3.76743  | -3.63371 |
| H | 4.76973  | 1.38796  | -1.11127 |
| H | 4.82213  | 1.21442  | -2.87401 |
| H | 3.78674  | 2.4492   | -2.13509 |
| H | 2.29994  | -1.76143 | 4.34741  |
| H | -2.53003 | 4.33457  | 0.15495  |
| H | -5.58211 | 1.02111  | 0.80944  |
| H | -2.7668  | -1.25419 | -0.20563 |
| H | -6.84116 | -0.88141 | 1.01063  |
| H | -6.52233 | -2.12712 | -0.21955 |
| H | -5.85834 | -2.32152 | 1.38982  |
| H | -3.15217 | -2.33553 | -2.43722 |
| H | -3.81925 | -0.69842 | -2.36909 |
| H | -4.90143 | -2.10971 | -2.24126 |
| H | -2.83627 | -4.71252 | 0.50949  |
| H | -2.55652 | -4.0864  | -1.13138 |
| H | -1.77169 | -3.30009 | 0.26342  |



**Compound 1b:** Isomer 2S, 5R, 11S, 13S, 17S, 23S conformer 46

|   |          |          |          |
|---|----------|----------|----------|
| C | -1.23075 | 2.74529  | 1.43531  |
| C | -0.00734 | 3.33445  | 1.47046  |
| C | 0.53849  | 4.02608  | 0.30654  |
| C | -0.4065  | 4.05998  | -0.8981  |
| C | -1.20128 | 2.76264  | -0.95634 |
| O | -1.92917 | 2.56575  | 0.29274  |
| C | -2.00013 | 2.31044  | 2.65116  |
| C | -2.69815 | 0.93517  | 2.58197  |
| C | -1.71833 | -0.24052 | 2.56787  |
| C | -2.41385 | -1.61239 | 2.59758  |
| C | -3.13205 | -2.04159 | 1.28388  |
| C | -2.11966 | -2.66868 | 0.3383   |
| C | -4.26612 | -3.03416 | 1.56859  |
| O | -1.41788 | -1.7373  | -0.34972 |
| O | -1.92328 | -3.86373 | 0.2331   |
| C | -0.35798 | -2.24563 | -1.22784 |
| C | -0.11491 | -1.16634 | -2.27838 |
| C | 0.87424  | -2.55678 | -0.42346 |
| C | -1.26357 | -0.88348 | -3.23934 |
| C | -2.24157 | 2.63878  | -2.06839 |
| C | -2.57663 | 1.16245  | -2.38756 |
| C | -1.58422 | 0.58308  | -3.44261 |
| C | -1.91317 | -1.85071 | -3.89489 |
| C | -4.02707 | 0.9854   | -2.85275 |
| O | 1.62839  | 4.58547  | 0.29544  |
| O | -3.51776 | 0.77467  | 3.74408  |
| C | 1.13418  | -3.65597 | 0.33615  |
| O | 2.37157  | -3.50569 | 0.88916  |
| C | 2.82727  | -2.29593 | 0.42718  |
| N | 1.96625  | -1.6992  | -0.35642 |
| C | 4.15916  | -1.92993 | 0.86268  |
| C | 4.8667   | -0.82443 | 0.5448   |
| C | 4.36681  | 0.26803  | -0.39657 |
| C | 6.26873  | -0.65647 | 1.0699   |
| C | 4.6763   | -0.08791 | -1.85515 |
| O | 5.00966  | 1.51148  | -0.1308  |
| C | 4.42383  | 2.2515   | 0.92758  |
| H | 0.53418  | 3.40479  | 2.40704  |

|   |          |          |          |
|---|----------|----------|----------|
| H | -1.08165 | 4.92248  | -0.7994  |
| H | 0.17978  | 4.19798  | -1.81137 |
| H | -0.48379 | 1.93022  | -1.01605 |
| H | -1.34594 | 2.34382  | 3.52821  |
| H | -2.78369 | 3.06703  | 2.81643  |
| H | -3.32094 | 0.90803  | 1.67651  |
| H | -1.07784 | -0.15425 | 3.45572  |
| H | -1.06684 | -0.1558  | 1.6909   |
| H | -3.15859 | -1.59674 | 3.39929  |
| H | -1.68425 | -2.38694 | 2.86589  |
| H | -3.54135 | -1.15087 | 0.79284  |
| H | -4.75954 | -3.35507 | 0.6453   |
| H | -5.01538 | -2.56935 | 2.21795  |
| H | -3.88061 | -3.92943 | 2.06543  |
| H | -0.73756 | -3.1659  | -1.67526 |
| H | 0.773    | -1.45942 | -2.85358 |
| H | 0.17628  | -0.25234 | -1.75163 |
| H | -3.13683 | 3.18411  | -1.74526 |
| H | -1.87427 | 3.14618  | -2.96992 |
| H | -2.45716 | 0.5917   | -1.45776 |
| H | -2.00374 | 0.74814  | -4.4433  |
| H | -0.64371 | 1.15031  | -3.40892 |
| H | -2.6933  | -1.6223  | -4.61658 |
| H | -1.69259 | -2.90555 | -3.74847 |
| H | -4.73351 | 1.30107  | -2.07595 |
| H | -4.2298  | 1.58072  | -3.75275 |
| H | -4.2347  | -0.06388 | -3.09035 |
| H | -4.23367 | 1.42706  | 3.69881  |
| H | 0.5845   | -4.55034 | 0.57775  |
| H | 4.61722  | -2.67829 | 1.50473  |
| H | 3.28006  | 0.37594  | -0.2887  |
| H | 6.59092  | -1.53569 | 1.6356   |
| H | 6.97469  | -0.49066 | 0.24669  |
| H | 6.35021  | 0.22429  | 1.71668  |
| H | 5.75268  | -0.22855 | -2.00151 |
| H | 4.34719  | 0.72926  | -2.50467 |
| H | 4.15399  | -1.0047  | -2.14169 |
| H | 3.40263  | 2.57467  | 0.68335  |
| H | 4.40104  | 1.68181  | 1.87008  |

H 5.04247 3.14153 1.06949

**Compound 1b:** Isomer 2S, 5R, 11S, 13S, 17S, 23S conformer 47

C 3.07992 -1.86512 -0.18172  
C 4.17267 -2.63845 -0.4096  
C 5.50231 -2.06141 -0.57467  
C 5.53906 -0.53873 -0.44995  
C 4.23656 0.08769 -0.94403  
O 3.09738 -0.51127 -0.25563  
C 1.73767 -2.42015 0.21158  
C 1.56278 -2.62349 1.73262  
C 1.53049 -1.32856 2.56388  
C 0.30782 -0.44422 2.28583  
C 0.38372 0.95708 2.93601  
C -0.61142 1.91933 2.28502  
C 0.20509 0.94799 4.45738  
O -0.53442 1.83249 0.93591  
O -1.34766 2.68442 2.86958  
C -1.41306 2.66695 0.13312  
C -0.81007 2.70223 -1.28278  
C -2.79356 2.08325 0.14391  
C 0.62999 3.18512 -1.37018  
C 4.19446 1.60251 -0.73683  
C 3.13935 2.44206 -1.49992  
C 1.70085 2.1572 -1.02951  
C 0.88237 4.45082 -1.72324  
C 3.28729 2.31589 -3.02466  
O 6.51841 -2.72371 -0.73862  
O 0.3499 -3.37222 1.86489  
C -3.9238 2.54983 0.73505  
O -4.92865 1.65761 0.49524  
C -4.34493 0.65436 -0.23869  
N -3.0796 0.8759 -0.48043  
C -5.21257 -0.44703 -0.60257  
C -4.85401 -1.62905 -1.14865  
C -3.41795 -1.99896 -1.50548  
C -5.90577 -2.65672 -1.47647  
C -3.10377 -1.65756 -2.96516

|   |          |          |          |
|---|----------|----------|----------|
| O | -3.19311 | -3.39949 | -1.34674 |
| C | -2.95821 | -3.78838 | -0.00391 |
| H | 4.08422  | -3.71914 | -0.38439 |
| H | 5.70295  | -0.28011 | 0.60684  |
| H | 6.39212  | -0.15505 | -1.01726 |
| H | 4.10899  | -0.16756 | -2.00552 |
| H | 0.94281  | -1.77542 | -0.17429 |
| H | 1.61586  | -3.40535 | -0.24927 |
| H | 2.41253  | -3.23304 | 2.07956  |
| H | 2.45154  | -0.76665 | 2.35951  |
| H | 1.57159  | -1.60415 | 3.62788  |
| H | -0.60394 | -0.95216 | 2.62389  |
| H | 0.20272  | -0.31257 | 1.20791  |
| H | 1.37549  | 1.37359  | 2.69693  |
| H | 0.25338  | 1.9611   | 4.86505  |
| H | 0.98406  | 0.34563  | 4.93604  |
| H | -0.77012 | 0.5297   | 4.73031  |
| H | -1.42868 | 3.66607  | 0.57735  |
| H | -1.45714 | 3.35629  | -1.87871 |
| H | -0.90169 | 1.69473  | -1.70485 |
| H | 4.10194  | 1.7885   | 0.3419   |
| H | 5.18525  | 1.97711  | -1.02767 |
| H | 3.37989  | 3.48014  | -1.23098 |
| H | 1.38066  | 1.18224  | -1.42034 |
| H | 1.70096  | 2.02358  | 0.05845  |
| H | 1.88812  | 4.852    | -1.80459 |
| H | 0.07585  | 5.14476  | -1.94839 |
| H | 4.30879  | 2.54971  | -3.34879 |
| H | 3.04993  | 1.30221  | -3.3699  |
| H | 2.60586  | 3.00053  | -3.53838 |
| H | 0.19668  | -3.52245 | 2.81111  |
| H | -4.16517 | 3.41404  | 1.33248  |
| H | -6.26215 | -0.2617  | -0.38728 |
| H | -2.7274  | -1.43757 | -0.86445 |
| H | -6.91189 | -2.27917 | -1.27178 |
| H | -5.85202 | -2.9469  | -2.53342 |
| H | -5.75276 | -3.57763 | -0.90325 |
| H | -2.08089 | -1.9699  | -3.19796 |
| H | -3.19268 | -0.57976 | -3.12787 |

|   |          |          |          |
|---|----------|----------|----------|
| H | -3.78348 | -2.17938 | -3.64731 |
| H | -2.82862 | -4.87425 | -0.00913 |
| H | -2.04675 | -3.32565 | 0.40262  |
| H | -3.80398 | -3.53719 | 0.65565  |

**Compound 1b:** Isomer 2S, 5R, 11S, 13S, 17S, 23S conformer 52

|   |          |          |          |
|---|----------|----------|----------|
| C | 0.07107  | -2.71796 | 1.17567  |
| C | -1.03572 | -3.18034 | 0.53624  |
| C | -0.93489 | -3.87721 | -0.74472 |
| C | 0.50062  | -4.05154 | -1.2496  |
| C | 1.30767  | -2.82171 | -0.86123 |
| O | 1.28708  | -2.65777 | 0.58704  |
| C | 0.11951  | -2.32864 | 2.62795  |
| C | 0.94334  | -1.07635 | 3.00075  |
| C | 0.28525  | 0.23631  | 2.57034  |
| C | 1.07809  | 1.48564  | 2.99555  |
| C | 2.36977  | 1.78793  | 2.18091  |
| C | 1.99633  | 2.50037  | 0.89035  |
| C | 3.34854  | 2.64855  | 2.98934  |
| O | 1.5996   | 1.62687  | -0.06996 |
| O | 2.00568  | 3.70383  | 0.73296  |
| C | 1.08521  | 2.21435  | -1.30425 |
| C | 1.22879  | 1.1456   | -2.38716 |
| C | -0.33566 | 2.64949  | -1.10687 |
| C | 2.65595  | 0.75253  | -2.75598 |
| C | 2.7783   | -2.78603 | -1.27268 |
| C | 3.30204  | -1.33652 | -1.39173 |
| C | 2.93704  | -0.73509 | -2.7838  |
| C | 3.58718  | 1.65689  | -3.07602 |
| C | 4.81081  | -1.24138 | -1.13748 |
| O | -1.89612 | -4.33415 | -1.35128 |
| O | 1.07198  | -1.01768 | 4.42586  |
| C | -0.81434 | 3.91312  | -0.96581 |
| O | -2.16845 | 3.84185  | -0.8282  |
| C | -2.46272 | 2.50026  | -0.88001 |
| N | -1.40076 | 1.75675  | -1.0523  |
| C | -3.87309 | 2.18354  | -0.75736 |
| C | -4.45686 | 0.98175  | -0.56496 |

|   |          |          |          |
|---|----------|----------|----------|
| C | -3.69403 | -0.32946 | -0.42118 |
| C | -5.95993 | 0.88594  | -0.49177 |
| C | -3.77642 | -1.18036 | -1.69054 |
| O | -4.24287 | -1.1177  | 0.6428   |
| C | -3.9809  | -0.59303 | 1.92975  |
| H | -2.00665 | -3.1363  | 1.01678  |
| H | 0.93634  | -4.95757 | -0.80412 |
| H | 0.48588  | -4.18508 | -2.33528 |
| H | 0.78567  | -1.94155 | -1.26607 |
| H | -0.90021 | -2.22819 | 3.01354  |
| H | 0.56841  | -3.18108 | 3.16264  |
| H | 1.93644  | -1.16336 | 2.53765  |
| H | -0.70546 | 0.27748  | 3.04258  |
| H | 0.12514  | 0.22629  | 1.48664  |
| H | 1.3625   | 1.36442  | 4.04555  |
| H | 0.42555  | 2.36684  | 2.94996  |
| H | 2.85155  | 0.83986  | 1.91331  |
| H | 4.24976  | 2.87978  | 2.41199  |
| H | 3.64766  | 2.12037  | 3.90079  |
| H | 2.88532  | 3.59847  | 3.27255  |
| H | 1.69515  | 3.09201  | -1.52667 |
| H | 0.71472  | 1.51741  | -3.28364 |
| H | 0.65723  | 0.27022  | -2.06298 |
| H | 3.34967  | -3.35117 | -0.52615 |
| H | 2.90497  | -3.31084 | -2.22874 |
| H | 2.79711  | -0.74228 | -0.61911 |
| H | 3.75368  | -0.95545 | -3.48328 |
| H | 2.0494   | -1.24664 | -3.18152 |
| H | 4.58676  | 1.35894  | -3.38201 |
| H | 3.39423  | 2.72707  | -3.05322 |
| H | 5.0629   | -1.57148 | -0.12281 |
| H | 5.37164  | -1.86813 | -1.8433  |
| H | 5.16063  | -0.20956 | -1.25303 |
| H | 1.62096  | -1.76526 | 4.70862  |
| H | -0.36329 | 4.89144  | -0.92762 |
| H | -4.50806 | 3.06332  | -0.83366 |
| H | -2.63937 | -0.11778 | -0.20727 |
| H | -6.43121 | 1.86848  | -0.5866  |
| H | -6.34852 | 0.24228  | -1.29134 |

|   |          |          |          |
|---|----------|----------|----------|
| H | -6.28123 | 0.42762  | 0.44945  |
| H | -4.81696 | -1.38629 | -1.96203 |
| H | -3.27403 | -2.13839 | -1.52927 |
| H | -3.29363 | -0.6573  | -2.52224 |
| H | -2.89958 | -0.49318 | 2.11243  |
| H | -4.44423 | 0.39327  | 2.0858   |
| H | -4.40242 | -1.298   | 2.65188  |

**Compound 1b:** Isomer 2S, 5R, 11S, 13S, 17S, 23S conformer 55

|   |          |          |          |
|---|----------|----------|----------|
| C | -2.51548 | 2.15526  | 0.63899  |
| C | -3.06862 | 3.30755  | 0.1809   |
| C | -4.05809 | 3.31611  | -0.89132 |
| C | -4.466   | 1.9259   | -1.37748 |
| C | -3.31315 | 0.93083  | -1.27082 |
| O | -2.73679 | 0.9464   | 0.06832  |
| C | -1.58168 | 2.09422  | 1.81658  |
| C | -2.06543 | 1.29907  | 3.06178  |
| C | -2.19143 | -0.22462 | 2.87936  |
| C | -0.88777 | -0.92836 | 2.47408  |
| C | -1.06312 | -2.44019 | 2.17612  |
| C | 0.04757  | -2.94273 | 1.25453  |
| C | -1.15675 | -3.30646 | 3.43505  |
| O | 0.11101  | -2.18414 | 0.13221  |
| O | 0.77099  | -3.89292 | 1.46431  |
| C | 1.15693  | -2.48344 | -0.83908 |
| C | 0.73429  | -1.81511 | -2.15468 |
| C | 2.47599  | -1.97127 | -0.33933 |
| C | -0.51301 | -2.38498 | -2.82279 |
| C | -3.73688 | -0.50714 | -1.55928 |
| C | -2.61472 | -1.56754 | -1.53379 |
| C | -1.77324 | -1.5378  | -2.83711 |
| C | -0.46778 | -3.57502 | -3.43313 |
| C | -3.21687 | -2.96065 | -1.30224 |
| O | -4.57205 | 4.33406  | -1.33562 |
| O | -1.22587 | 1.62641  | 4.16974  |
| C | 3.45799  | -2.64889 | 0.31158  |
| O | 4.4707   | -1.77558 | 0.58044  |
| C | 4.04762  | -0.5715  | 0.07448  |

|   |          |          |          |
|---|----------|----------|----------|
| N | 2.86799  | -0.64568 | -0.48616 |
| C | 4.96743  | 0.53374  | 0.24457  |
| C | 4.76734  | 1.83327  | -0.0618  |
| C | 3.49109  | 2.35049  | -0.70173 |
| C | 5.85333  | 2.84496  | 0.18938  |
| C | 3.5713   | 2.24796  | -2.23473 |
| O | 3.32071  | 3.70292  | -0.26978 |
| C | 2.00437  | 4.19556  | -0.40308 |
| H | -2.8221  | 4.25192  | 0.65279  |
| H | -5.31214 | 1.58392  | -0.76337 |
| H | -4.81906 | 1.99566  | -2.4107  |
| H | -2.504   | 1.24892  | -1.94487 |
| H | -0.61942 | 1.68546  | 1.47781  |
| H | -1.39713 | 3.11621  | 2.15848  |
| H | -3.04868 | 1.69068  | 3.34564  |
| H | -2.95288 | -0.42057 | 2.11647  |
| H | -2.56606 | -0.62885 | 3.82764  |
| H | -0.12969 | -0.81871 | 3.26365  |
| H | -0.48837 | -0.45175 | 1.57594  |
| H | -1.98994 | -2.54848 | 1.59357  |
| H | -1.31667 | -4.3579  | 3.18017  |
| H | -1.98522 | -2.97591 | 4.06966  |
| H | -0.23103 | -3.24612 | 4.01676  |
| H | 1.20429  | -3.5698  | -0.94702 |
| H | 1.58484  | -1.91348 | -2.83979 |
| H | 0.62209  | -0.74353 | -1.96312 |
| H | -4.50153 | -0.77151 | -0.81653 |
| H | -4.24069 | -0.5196  | -2.53636 |
| H | -1.95283 | -1.33751 | -0.69446 |
| H | -2.4158  | -1.86604 | -3.66557 |
| H | -1.48951 | -0.49867 | -3.05845 |
| H | -1.33422 | -3.9928  | -3.93946 |
| H | 0.43806  | -4.17796 | -3.45482 |
| H | -3.75263 | -3.00476 | -0.34621 |
| H | -3.93397 | -3.21749 | -2.09377 |
| H | -2.44134 | -3.73237 | -1.29369 |
| H | -0.33522 | 1.29351  | 3.97501  |
| H | 3.57485  | -3.66416 | 0.65352  |
| H | 5.9192   | 0.23945  | 0.67915  |



|   |         |         |          |
|---|---------|---------|----------|
| H | 2.64149 | 1.74588 | -0.35787 |
| H | 6.75546 | 2.37157 | 0.58748  |
| H | 6.11663 | 3.37716 | -0.73383 |
| H | 5.50812 | 3.60972 | 0.89279  |
| H | 2.66804 | 2.65674 | -2.70009 |
| H | 3.65939 | 1.20018 | -2.53491 |
| H | 4.43427 | 2.80435 | -2.61564 |
| H | 1.99475 | 5.1941  | 0.04222  |
| H | 1.6842  | 4.27868 | -1.45212 |
| H | 1.27761 | 3.56103 | 0.13002  |

**Compound 1b:** Isomer 2S, 5R, 11S, 13S, 17S, 23S conformer 56

|   |          |          |          |
|---|----------|----------|----------|
| C | 2.21206  | 2.32299  | -1.56363 |
| C | 1.9058   | 3.53712  | -1.03635 |
| C | 2.65446  | 4.10055  | 0.08456  |
| C | 3.80011  | 3.21326  | 0.58143  |
| C | 3.42619  | 1.7465   | 0.41676  |
| O | 3.08838  | 1.47215  | -0.97442 |
| C | 1.68391  | 1.81321  | -2.87765 |
| C | 0.72596  | 0.5882   | -2.85985 |
| C | 1.38297  | -0.69841 | -2.34535 |
| C | 0.53153  | -1.9622  | -2.53688 |
| C | 1.05507  | -3.20449 | -1.75128 |
| C | 0.53395  | -3.17756 | -0.31842 |
| C | 0.66161  | -4.52248 | -2.42647 |
| O | 1.0121   | -2.09679 | 0.36128  |
| O | -0.23802 | -3.97189 | 0.16976  |
| C | 0.3434   | -1.72433 | 1.59515  |
| C | 1.09807  | -0.50298 | 2.1515   |
| C | -1.07858 | -1.34667 | 1.29177  |
| C | 2.47376  | -0.70821 | 2.7639   |
| C | 4.50553  | 0.7444   | 0.81831  |
| C | 4.08823  | -0.74311 | 0.67816  |
| C | 3.58453  | -1.39588 | 1.99358  |
| C | 2.69733  | -0.26017 | 4.00681  |
| C | 5.25554  | -1.58042 | 0.12966  |
| O | 2.44201  | 5.20965  | 0.55737  |
| O | -0.47719 | 0.89963  | -2.17094 |

|   |          |          |          |
|---|----------|----------|----------|
| C | -2.23676 | -1.76931 | 1.85533  |
| O | -3.27095 | -1.10352 | 1.25039  |
| C | -2.68402 | -0.29119 | 0.32205  |
| N | -1.37704 | -0.40399 | 0.31724  |
| C | -3.45891 | 0.54798  | -0.56837 |
| C | -4.77146 | 0.86365  | -0.5268  |
| C | -5.75134 | 0.37382  | 0.536    |
| C | -5.3571  | 1.73562  | -1.60827 |
| C | -6.53147 | -0.85602 | 0.06269  |
| O | -6.7154  | 1.37814  | 0.85013  |
| C | -6.21017 | 2.40737  | 1.68047  |
| H | 1.16399  | 4.16325  | -1.51848 |
| H | 4.7041   | 3.4452   | -0.0006  |
| H | 4.00902  | 3.44869  | 1.62931  |
| H | 2.50972  | 1.56914  | 0.99239  |
| H | 1.15211  | 2.6361   | -3.36405 |
| H | 2.54788  | 1.56309  | -3.51026 |
| H | 0.43631  | 0.43882  | -3.91075 |
| H | 1.60547  | -0.56664 | -1.28589 |
| H | 2.3513   | -0.83224 | -2.84667 |
| H | 0.50905  | -2.22641 | -3.60234 |
| H | -0.50675 | -1.75632 | -2.25175 |
| H | 2.15111  | -3.13551 | -1.70144 |
| H | 1.01163  | -5.38588 | -1.85283 |
| H | 1.0952   | -4.57326 | -3.43085 |
| H | -0.42631 | -4.60548 | -2.51435 |
| H | 0.36649  | -2.57142 | 2.28715  |
| H | 0.4512   | -0.05128 | 2.9112   |
| H | 1.13805  | 0.21741  | 1.32625  |
| H | 5.38523  | 0.94162  | 0.19212  |
| H | 4.80148  | 0.96591  | 1.85205  |
| H | 3.27985  | -0.79648 | -0.05498 |
| H | 3.26277  | -2.41479 | 1.73816  |
| H | 4.44192  | -1.5054  | 2.67121  |
| H | 3.66898  | -0.36125 | 4.48404  |
| H | 1.92057  | 0.22307  | 4.59493  |
| H | 5.57451  | -1.21284 | -0.85231 |
| H | 6.12385  | -1.53817 | 0.80039  |
| H | 4.97366  | -2.63452 | 0.01953  |

|   |          |          |          |
|---|----------|----------|----------|
| H | -0.45543 | 0.54221  | -1.26011 |
| H | -2.49879 | -2.49242 | 2.61055  |
| H | -2.84425 | 0.94762  | -1.37145 |
| H | -5.20473 | 0.11043  | 1.44978  |
| H | -5.77147 | 2.66044  | -1.19289 |
| H | -4.6071  | 1.99299  | -2.36077 |
| H | -6.1913  | 1.22885  | -2.11011 |
| H | -7.09695 | -0.63503 | -0.84822 |
| H | -7.2405  | -1.15808 | 0.8397   |
| H | -5.84864 | -1.68659 | -0.13874 |
| H | -5.38901 | 2.96512  | 1.20535  |
| H | -7.03843 | 3.09393  | 1.87426  |
| H | -5.84504 | 2.00749  | 2.63959  |

**Compound 1b:** Isomer 2S, 5R, 11S, 13S, 17S, 23S conformer 57

|   |          |          |          |
|---|----------|----------|----------|
| C | -2.23629 | 2.4214   | 0.49289  |
| C | -2.91479 | 3.53541  | 0.11615  |
| C | -4.20037 | 3.461    | -0.5686  |
| C | -4.75034 | 2.04284  | -0.72811 |
| C | -3.63488 | 1.00948  | -0.87028 |
| O | -2.64389 | 1.16945  | 0.18375  |
| C | -0.93325 | 2.46128  | 1.25362  |
| C | -0.73692 | 1.45688  | 2.41946  |
| C | -0.47752 | 0.03636  | 1.92725  |
| C | -0.20423 | -0.99657 | 3.03116  |
| C | -0.49519 | -2.46883 | 2.62425  |
| C | 0.35248  | -2.95034 | 1.44798  |
| C | -0.32287 | -3.41924 | 3.81434  |
| O | 0.01419  | -2.30953 | 0.29975  |
| O | 1.21003  | -3.80613 | 1.50338  |
| C | 0.78751  | -2.61195 | -0.89789 |
| C | 0.02091  | -1.99246 | -2.07657 |
| C | 2.18163  | -2.06493 | -0.7967  |
| C | -1.3235  | -2.62801 | -2.41824 |
| C | -4.14449 | -0.42907 | -0.78844 |
| C | -3.08913 | -1.55319 | -0.87506 |
| C | -2.5574  | -1.75038 | -2.31823 |
| C | -1.39601 | -3.89319 | -2.84664 |

|   |          |          |          |
|---|----------|----------|----------|
| C | -3.67876 | -2.86073 | -0.32674 |
| O | -4.8333  | 4.44192  | -0.93677 |
| O | 0.40708  | 1.84805  | 3.18686  |
| C | 3.34132  | -2.74328 | -0.59551 |
| O | 4.37044  | -1.85028 | -0.63477 |
| C | 3.77659  | -0.6319  | -0.85126 |
| N | 2.47549  | -0.71592 | -0.96153 |
| C | 4.68551  | 0.4923   | -0.95796 |
| C | 4.38097  | 1.80684  | -0.93347 |
| C | 2.96613  | 2.34177  | -0.74868 |
| C | 5.46489  | 2.83691  | -1.12143 |
| C | 2.30492  | 2.66394  | -2.0911  |
| O | 2.96807  | 3.54819  | 0.01542  |
| C | 3.19949  | 3.34336  | 1.40077  |
| H | -2.52545 | 4.51758  | 0.35981  |
| H | -5.35651 | 1.81467  | 0.16098  |
| H | -5.41774 | 2.01263  | -1.59456 |
| H | -3.09671 | 1.18833  | -1.81265 |
| H | -0.10696 | 2.30681  | 0.54508  |
| H | -0.81689 | 3.4789   | 1.64401  |
| H | -1.63209 | 1.46645  | 3.06353  |
| H | 0.35752  | 0.06387  | 1.21895  |
| H | -1.35402 | -0.26707 | 1.35554  |
| H | -0.84634 | -0.78496 | 3.89718  |
| H | 0.82704  | -0.9092  | 3.39189  |
| H | -1.53826 | -2.50531 | 2.27884  |
| H | -0.57039 | -4.44946 | 3.54149  |
| H | -0.97527 | -3.11289 | 4.63916  |
| H | 0.71189  | -3.41348 | 4.17049  |
| H | 0.83925  | -3.70004 | -0.99024 |
| H | 0.68005  | -2.06277 | -2.95075 |
| H | -0.09225 | -0.92372 | -1.87074 |
| H | -4.68372 | -0.52465 | 0.16362  |
| H | -4.89518 | -0.56195 | -1.58085 |
| H | -2.24214 | -1.27662 | -0.24077 |
| H | -3.36195 | -2.17814 | -2.93161 |
| H | -2.32071 | -0.76926 | -2.75488 |
| H | -2.34253 | -4.35019 | -3.12373 |
| H | -0.51351 | -4.52297 | -2.94228 |

|   |          |          |          |
|---|----------|----------|----------|
| H | -3.97728 | -2.74882 | 0.72263  |
| H | -4.56989 | -3.16125 | -0.89436 |
| H | -2.95234 | -3.67646 | -0.38804 |
| H | 0.22395  | 2.71268  | 3.58708  |
| H | 3.58866  | -3.77404 | -0.40086 |
| H | 5.72486  | 0.1949   | -1.07627 |
| H | 2.35994  | 1.58324  | -0.23726 |
| H | 6.43649  | 2.36707  | -1.29982 |
| H | 5.23583  | 3.48944  | -1.97377 |
| H | 5.5468   | 3.49532  | -0.25025 |
| H | 2.8884   | 3.4014   | -2.65222 |
| H | 1.30819  | 3.08223  | -1.91669 |
| H | 2.20838  | 1.7537   | -2.68947 |
| H | 2.41844  | 2.71829  | 1.85639  |
| H | 4.17747  | 2.87717  | 1.59533  |
| H | 3.18686  | 4.33258  | 1.86803  |

**Compound 1b:** Isomer 2S, 5R, 11S, 13S, 17S, 23S conformer 63

|   |          |          |          |
|---|----------|----------|----------|
| C | -0.40192 | 2.3504   | 1.26978  |
| C | 0.12411  | 3.58867  | 1.44432  |
| C | -0.42466 | 4.75602  | 0.76161  |
| C | -1.68872 | 4.47536  | -0.05689 |
| C | -1.68085 | 3.06612  | -0.64356 |
| O | -1.38653 | 2.08406  | 0.38268  |
| C | 0.05745  | 1.09647  | 1.9669   |
| C | -1.09706 | 0.19943  | 2.43315  |
| C | -0.63022 | -1.22707 | 2.76062  |
| C | -1.77331 | -2.23994 | 2.95186  |
| C | -2.71005 | -2.47221 | 1.73108  |
| C | -1.90611 | -2.92676 | 0.51804  |
| C | -3.7935  | -3.50593 | 2.06467  |
| O | -1.45432 | -1.87255 | -0.20136 |
| O | -1.67155 | -4.08445 | 0.23566  |
| C | -0.56443 | -2.16524 | -1.33134 |
| C | -0.54768 | -0.90283 | -2.19502 |
| C | 0.80628  | -2.53389 | -0.83499 |
| C | -1.80349 | -0.59879 | -3.00383 |
| C | -3.01188 | 2.65018  | -1.27315 |

|   |          |          |          |
|---|----------|----------|----------|
| C | -3.10856 | 1.17053  | -1.70314 |
| C | -2.25797 | 0.84702  | -2.96426 |
| C | -2.43374 | -1.52261 | -3.73649 |
| C | -4.57355 | 0.7711   | -1.92861 |
| O | 0.03268  | 5.88655  | 0.86844  |
| O | -1.68256 | 0.84504  | 3.57028  |
| C | 1.27587  | -3.75863 | -0.4748  |
| O | 2.57781  | -3.61964 | -0.09474 |
| C | 2.85574  | -2.28369 | -0.24285 |
| N | 1.82813  | -1.60158 | -0.68134 |
| C | 4.20932  | -1.89589 | 0.0961   |
| C | 4.77819  | -0.67445 | 0.01081  |
| C | 4.05922  | 0.54748  | -0.53439 |
| C | 6.21525  | -0.48351 | 0.41558  |
| C | 4.17424  | 0.59668  | -2.06911 |
| O | 4.64802  | 1.69194  | 0.08277  |
| C | 3.88768  | 2.87878  | -0.03233 |
| H | 0.93098  | 3.74078  | 2.15236  |
| H | -2.55438 | 4.59622  | 0.61065  |
| H | -1.77745 | 5.22501  | -0.84895 |
| H | -0.86079 | 2.99026  | -1.37346 |
| H | 0.66661  | 0.52486  | 1.25297  |
| H | 0.69391  | 1.35682  | 2.81866  |
| H | -1.82481 | 0.15735  | 1.61656  |
| H | -0.03298 | -1.18997 | 3.68079  |
| H | 0.03446  | -1.57673 | 1.96344  |
| H | -2.40708 | -1.92761 | 3.7943   |
| H | -1.34584 | -3.20804 | 3.24226  |
| H | -3.18559 | -1.52177 | 1.46442  |
| H | -4.49377 | -3.63166 | 1.23229  |
| H | -4.36364 | -3.18954 | 2.94498  |
| H | -3.34413 | -4.48139 | 2.27192  |
| H | -0.9944  | -3.01776 | -1.86047 |
| H | 0.30444  | -0.98358 | -2.88237 |
| H | -0.31088 | -0.0622  | -1.53569 |
| H | -3.80278 | 2.85548  | -0.53917 |
| H | -3.20448 | 3.31001  | -2.13104 |
| H | -2.72384 | 0.56587  | -0.87496 |
| H | -2.84214 | 1.08855  | -3.86151 |

|   |          |          |          |
|---|----------|----------|----------|
| H | -1.36884 | 1.49216  | -2.99128 |
| H | -3.29586 | -1.27038 | -4.34849 |
| H | -2.1162  | -2.56242 | -3.76659 |
| H | -5.16328 | 0.89092  | -1.01202 |
| H | -5.03776 | 1.39001  | -2.70793 |
| H | -4.64777 | -0.27571 | -2.24196 |
| H | -2.54591 | 0.43722  | 3.73476  |
| H | 0.84279  | -4.74323 | -0.41676 |
| H | 4.81285  | -2.72692 | 0.45175  |
| H | 2.9951   | 0.49463  | -0.26899 |
| H | 6.67162  | -1.42801 | 0.72557  |
| H | 6.80389  | -0.06343 | -0.40998 |
| H | 6.28758  | 0.23759  | 1.23635  |
| H | 5.22504  | 0.62102  | -2.37713 |
| H | 3.679    | 1.48769  | -2.46899 |
| H | 3.6937   | -0.2812  | -2.51019 |
| H | 3.854    | 3.26216  | -1.06257 |
| H | 2.85385  | 2.73697  | 0.31869  |
| H | 4.37543  | 3.62657  | 0.59855  |

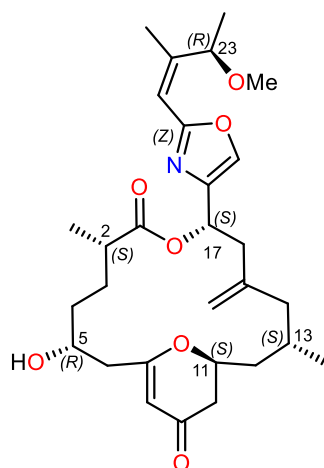

**Table 5.** Calculated DFT energies of the **1c**-(2S5R11S13S17S23R) diastereoisomer.

| Conformers <b>1c</b> | OPLS2008 Force Field | B3LYP/6-31+G(d,p) | $\Delta$ (DFT Energy) | % Population |
|----------------------|----------------------|-------------------|-----------------------|--------------|
| <b>1c27</b>          | 3.033771511          | -1710.457316      | 0                     | 31.66        |
| <b>1c3</b>           | 0.665033461          | -1710.456605      | 0.44615918            | 14.90        |
| <b>1c10</b>          | 1.587858509          | -1710.456251      | 0.6682975             | 10.24        |
| <b>1c1</b>           | 0                    | -1710.456055      | 0.79128934            | 8.31         |
| <b>1c49</b>          | 4.037237094          | -1710.455728      | 0.99648491            | 5.88         |
| <b>1c38</b>          | 3.522538241          | -1710.455608      | 1.07178604            | 5.18         |
| <b>1c23</b>          | 2.803417782          | -1710.455529      | 1.12135928            | 4.76         |
| <b>1c7</b>           | 1.343140535          | -1710.455497      | 1.14143958            | 4.60         |
| <b>1c30</b>          | 3.134942639          | -1710.454966      | 1.47464707            | 2.62         |
| <b>1c16</b>          | 2.067710325          | -1710.454909      | 1.5104151             | 2.47         |
| <b>1c22</b>          | 2.673087954          | -1710.454587      | 1.71247313            | 1.75         |
| <b>1c51</b>          | 4.068618547          | -1710.454511      | 1.76016384            | 1.62         |
| <b>1c52</b>          | 4.156716061          | -1710.454278      | 1.90637353            | 1.26         |
| <b>1c13</b>          | 1.850860421          | -1710.454269      | 1.91202111            | 1.25         |
| <b>1c42</b>          | 3.694694073          | -1710.453716      | 2.25903381            | 0.70         |
| <b>1c46</b>          | 3.740248566          | -1710.453422      | 2.44352157            | 0.51         |
| <b>1c57</b>          | 4.662165392          | -1710.453352      | 2.48744723            | 0.47         |
| <b>1c11</b>          | 1.756835564          | -1710.453154      | 2.61169409            | 0.38         |
| <b>1c55</b>          | 4.470984704          | -1710.452868      | 2.79116177            | 0.28         |
| <b>1c29</b>          | 3.091037285          | -1710.452806      | 2.83006735            | 0.27         |
| <b>1c31</b>          | 3.143283939          | -1710.452093      | 3.27748155            | 0.12         |
| <b>1c58</b>          | 4.684369025          | -1710.452083      | 3.28375664            | 0.12         |
| <b>1c19</b>          | 2.379732314          | -1710.452035      | 3.31387709            | 0.12         |
| <b>1c12</b>          | 1.842997132          | -1710.451995      | 3.33897747            | 0.11         |

24 conformers counting for the 99.58% of the DFT conformational population



DFT COORDINATES FOR CONFORMATIONAL SEARCH OF 1c  
(2S\*, 5R\*, 11S\*, 13S\*, 17S\*, 23R\*)

**Compound 1c:** Isomer 2S, 5R, 11S, 13S, 17S, 23R conformer 1

|   |          |          |          |
|---|----------|----------|----------|
| C | -2.78941 | 1.3837   | 1.26069  |
| C | -3.719   | 2.19976  | 1.82011  |
| C | -4.92354 | 2.59881  | 1.09399  |
| C | -5.07342 | 1.95431  | -0.28648 |
| C | -3.71604 | 1.6918   | -0.93558 |
| O | -2.85075 | 0.96248  | -0.02468 |
| C | -1.60595 | 0.78632  | 1.96638  |
| C | -1.7275  | -0.75212 | 2.07559  |
| C | -0.41494 | -1.40686 | 2.503    |
| C | -0.47684 | -2.94303 | 2.5511   |
| C | -0.80364 | -3.67487 | 1.21944  |
| C | 0.3051   | -3.48493 | 0.19306  |
| C | -1.03276 | -5.17153 | 1.46749  |
| O | 0.20625  | -2.28942 | -0.44625 |
| O | 1.18577  | -4.28867 | -0.03541 |
| C | 1.24332  | -1.99936 | -1.43554 |
| C | 0.70312  | -0.91046 | -2.37544 |
| C | 2.51377  | -1.58387 | -0.75301 |
| C | -0.61251 | -1.26401 | -3.04904 |
| C | -3.80923 | 0.90525  | -2.24382 |
| C | -2.48369 | 0.51452  | -2.95062 |
| C | -1.89013 | -0.80057 | -2.37073 |
| C | -0.63374 | -1.95145 | -4.19649 |
| C | -1.48023 | 1.67678  | -2.9921  |
| O | -5.78341 | 3.33394  | 1.55945  |
| O | -2.72085 | -1.1189  | 3.03247  |
| C | 3.60545  | -2.34131 | -0.46571 |
| O | 4.51967  | -1.54968 | 0.16385  |
| C | 3.92989  | -0.31256 | 0.23805  |
| N | 2.73181  | -0.29189 | -0.28702 |
| C | 4.72791  | 0.7156   | 0.87598  |
| C | 4.48196  | 2.04149  | 0.93867  |
| C | 3.25451  | 2.70446  | 0.32549  |
| C | 5.43147  | 2.94946  | 1.67695  |
| C | 2.14842  | 2.9059   | 1.36457  |

|   |          |          |          |
|---|----------|----------|----------|
| O | 3.57224  | 3.99599  | -0.19621 |
| C | 4.2466   | 3.95191  | -1.43914 |
| H | -3.60167 | 2.5365   | 2.84411  |
| H | -5.61885 | 1.00699  | -0.16222 |
| H | -5.6877  | 2.6032   | -0.91782 |
| H | -3.21623 | 2.65516  | -1.11092 |
| H | -0.70291 | 1.03177  | 1.3933   |
| H | -1.50935 | 1.21272  | 2.96972  |
| H | -2.00549 | -1.12933 | 1.08231  |
| H | -0.15639 | -1.03971 | 3.50526  |
| H | 0.37481  | -1.07389 | 1.82128  |
| H | -1.2466  | -3.23458 | 3.2738   |
| H | 0.47815  | -3.32862 | 2.932    |
| H | -1.7158  | -3.23782 | 0.79792  |
| H | -1.28555 | -5.69551 | 0.54002  |
| H | -1.85449 | -5.3125  | 2.17734  |
| H | -0.13291 | -5.64047 | 1.87661  |
| H | 1.41985  | -2.92373 | -1.99025 |
| H | 1.48302  | -0.74406 | -3.12844 |
| H | 0.61291  | 0.01919  | -1.80599 |
| H | -4.40698 | 0.00072  | -2.06722 |
| H | -4.39753 | 1.53422  | -2.92602 |
| H | -2.75521 | 0.2899   | -3.99214 |
| H | -1.70844 | -0.67467 | -1.30209 |
| H | -2.65713 | -1.5796  | -2.47254 |
| H | -1.56777 | -2.23711 | -4.67547 |
| H | 0.27912  | -2.25944 | -4.70213 |
| H | -1.94536 | 2.58386  | -3.39798 |
| H | -1.0933  | 1.91536  | -1.99486 |
| H | -0.62747 | 1.43125  | -3.63297 |
| H | -3.55328 | -0.688   | 2.77954  |
| H | 3.85666  | -3.38072 | -0.59853 |
| H | 5.6266   | 0.32623  | 1.34847  |
| H | 2.86319  | 2.06965  | -0.47882 |
| H | 6.24956  | 2.38565  | 2.13429  |
| H | 5.8566   | 3.70742  | 1.01004  |
| H | 4.909    | 3.50211  | 2.46834  |
| H | 1.29705  | 3.4103   | 0.89652  |
| H | 1.81988  | 1.93897  | 1.75691  |

|   |         |         |          |
|---|---------|---------|----------|
| H | 2.49631 | 3.52669 | 2.19678  |
| H | 5.22419 | 3.45023 | -1.36918 |
| H | 3.64833 | 3.43243 | -2.20389 |
| H | 4.40339 | 4.98754 | -1.75273 |

**Compound 1c:** Isomer 2S, 5R, 11S, 13S, 17S, 23R conformer 3

|   |          |          |          |
|---|----------|----------|----------|
| C | 1.8576   | 2.12526  | -1.24422 |
| C | 2.90328  | 2.88424  | -1.66826 |
| C | 3.59038  | 3.80602  | -0.76921 |
| C | 2.94392  | 3.93462  | 0.61219  |
| C | 2.30164  | 2.62653  | 1.08077  |
| O | 1.44006  | 2.07371  | 0.0408   |
| C | 1.07889  | 1.17618  | -2.10896 |
| C | 1.71141  | -0.23828 | -2.0751  |
| C | 0.78088  | -1.30434 | -2.65111 |
| C | 1.37052  | -2.7258  | -2.62988 |
| C | 1.85565  | -3.26772 | -1.25696 |
| C | 0.71017  | -3.34601 | -0.25653 |
| C | 2.50182  | -4.64988 | -1.42146 |
| O | 0.51724  | -2.16302 | 0.37962  |
| O | 0.03017  | -4.33096 | -0.05011 |
| C | -0.59404 | -2.09556 | 1.33008  |
| C | -0.31945 | -0.88742 | 2.22919  |
| C | -1.9043  | -1.98204 | 0.60236  |
| C | 0.89036  | -1.00056 | 3.15208  |
| C | 3.3273   | 1.57438  | 1.53138  |
| C | 2.75788  | 0.18017  | 1.86454  |
| C | 1.85037  | 0.17233  | 3.12402  |
| C | 1.07066  | -2.04414 | 3.968    |
| C | 3.89525  | -0.84009 | 2.01191  |
| O | 4.55932  | 4.47958  | -1.093   |
| O | 2.92792  | -0.27351 | -2.81805 |
| C | -2.72234 | -2.9795  | 0.1704   |
| O | -3.80416 | -2.41092 | -0.43409 |
| C | -3.59591 | -1.05758 | -0.34109 |
| N | -2.47117 | -0.75999 | 0.25674  |
| C | -4.6389  | -0.22746 | -0.9114  |
| C | -4.80421 | 1.10593  | -0.77925 |

|   |          |          |          |
|---|----------|----------|----------|
| C | -3.86897 | 1.99766  | 0.02869  |
| C | -5.94957 | 1.7965   | -1.4736  |
| C | -2.85043 | 2.70649  | -0.8671  |
| O | -4.59663 | 3.01869  | 0.71462  |
| C | -5.27523 | 2.55173  | 1.86493  |
| H | 3.19423  | 2.86922  | -2.71333 |
| H | 3.69388  | 4.27869  | 1.33048  |
| H | 2.17727  | 4.71863  | 0.53915  |
| H | 1.60003  | 2.83055  | 1.89375  |
| H | 0.05291  | 1.12496  | -1.7284  |
| H | 1.05679  | 1.5289   | -3.14496 |
| H | 1.90627  | -0.48574 | -1.0247  |
| H | 0.54662  | -1.04408 | -3.6921  |
| H | -0.16072 | -1.26783 | -2.09166 |
| H | 2.23465  | -2.75321 | -3.30215 |
| H | 0.62728  | -3.4247  | -3.03567 |
| H | 2.59806  | -2.56882 | -0.85702 |
| H | 2.89292  | -5.02317 | -0.4692  |
| H | 3.33116  | -4.59427 | -2.13431 |
| H | 1.77228  | -5.37772 | -1.78868 |
| H | -0.58387 | -3.02863 | 1.89717  |
| H | -1.22019 | -0.72164 | 2.83464  |
| H | -0.2306  | -0.00735 | 1.58495  |
| H | 4.08852  | 1.46377  | 0.74747  |
| H | 3.85194  | 1.98694  | 2.40541  |
| H | 2.14129  | -0.13064 | 1.01572  |
| H | 2.48153  | 0.16678  | 4.02228  |
| H | 1.26     | 1.09857  | 3.16293  |
| H | 1.91748  | -2.09496 | 4.64757  |
| H | 0.3825   | -2.88607 | 3.99845  |
| H | 4.47851  | -0.92242 | 1.08683  |
| H | 4.58546  | -0.55    | 2.81515  |
| H | 3.49879  | -1.83209 | 2.25123  |
| H | 3.53174  | 0.37717  | -2.42299 |
| H | -2.66874 | -4.05541 | 0.18512  |
| H | -5.35656 | -0.78925 | -1.50472 |
| H | -3.32317 | 1.38449  | 0.75588  |
| H | -6.55022 | 1.09091  | -2.05482 |
| H | -6.60056 | 2.3059   | -0.75497 |

|   |          |         |          |
|---|----------|---------|----------|
| H | -5.58181 | 2.57584 | -2.15373 |
| H | -2.19247 | 3.32869 | -0.25271 |
| H | -2.24294 | 1.97058 | -1.40187 |
| H | -3.34971 | 3.35219 | -1.59695 |
| H | -6.04267 | 1.80024 | 1.62331  |
| H | -4.57765 | 2.10802 | 2.59245  |
| H | -5.76139 | 3.41841 | 2.321    |

**Compound 1c:** Isomer 2S, 5R, 11S, 13S, 17S, 23R conformer 7

|   |          |          |          |
|---|----------|----------|----------|
| C | -1.83637 | -2.14743 | -1.2671  |
| C | -2.8184  | -3.00451 | -1.64015 |
| C | -3.4011  | -3.95222 | -0.69881 |
| C | -2.72637 | -3.97239 | 0.67555  |
| C | -2.18226 | -2.60029 | 1.08028  |
| O | -1.3803  | -2.0298  | 0.00359  |
| C | -1.12827 | -1.18676 | -2.1795  |
| C | -1.70131 | 0.24758  | -2.08485 |
| C | -0.74207 | 1.29408  | -2.6691  |
| C | -1.30526 | 2.7263   | -2.67519 |
| C | -1.80679 | 3.29328  | -1.3196  |
| C | -0.67879 | 3.37784  | -0.29984 |
| C | -2.43699 | 4.67859  | -1.51612 |
| O | -0.50394 | 2.20049  | 0.35     |
| O | -0.00185 | 4.36353  | -0.08751 |
| C | 0.57021  | 2.14575  | 1.34249  |
| C | 0.25555  | 0.95326  | 2.2485   |
| C | 1.90729  | 2.01986  | 0.6693   |
| C | -0.98734 | 1.08697  | 3.1238   |
| C | -3.27653 | -1.60828 | 1.50189  |
| C | -2.78638 | -0.18157 | 1.82257  |
| C | -1.92489 | -0.10373 | 3.11284  |
| C | -1.21542 | 2.16174  | 3.88546  |
| C | -3.97266 | 0.78884  | 1.90513  |
| O | -4.30693 | -4.72647 | -0.98039 |
| O | -3.00669 | 0.32258  | -2.65742 |
| C | 2.76746  | 3.00911  | 0.30679  |
| O | 3.86582  | 2.43219  | -0.25904 |
| C | 3.62214  | 1.08194  | -0.21663 |

|   |          |          |          |
|---|----------|----------|----------|
| N | 2.46267  | 0.79494  | 0.31648  |
| C | 4.67506  | 0.24366  | -0.75541 |
| C | 4.77866  | -1.10126 | -0.69606 |
| C | 3.74083  | -2.00135 | -0.03608 |
| C | 5.95305  | -1.79653 | -1.33484 |
| C | 2.76555  | -2.57856 | -1.06501 |
| O | 4.36072  | -3.11169 | 0.6154   |
| C | 4.95096  | -2.77804 | 1.85714  |
| H | -3.16479 | -3.01961 | -2.66709 |
| H | -3.43691 | -4.34462 | 1.41947  |
| H | -1.90123 | -4.69641 | 0.6216   |
| H | -1.45556 | -2.71623 | 1.88907  |
| H | -0.06959 | -1.16709 | -1.8952  |
| H | -1.19057 | -1.53822 | -3.21667 |
| H | -1.85538 | 0.47928  | -1.03035 |
| H | -0.49006 | 1.01981  | -3.7057  |
| H | 0.19619  | 1.24856  | -2.10357 |
| H | -2.16029 | 2.76375  | -3.35982 |
| H | -0.54514 | 3.40691  | -3.08049 |
| H | -2.56225 | 2.60668  | -0.92377 |
| H | -2.8343  | 5.07151  | -0.57461 |
| H | -3.26019 | 4.61871  | -2.23581 |
| H | -1.69674 | 5.39347  | -1.88756 |
| H | 0.54192  | 3.08814  | 1.89307  |
| H | 1.13191  | 0.78974  | 2.88976  |
| H | 0.1842   | 0.065    | 1.61309  |
| H | -4.02662 | -1.5511  | 0.70276  |
| H | -3.78957 | -2.03663 | 2.37529  |
| H | -2.15511 | 0.13784  | 0.98803  |
| H | -2.5878  | -0.07213 | 3.98725  |
| H | -1.32078 | -1.01646 | 3.21364  |
| H | -2.087   | 2.2244   | 4.53188  |
| H | -0.54569 | 3.01872  | 3.90296  |
| H | -4.51838 | 0.82773  | 0.95512  |
| H | -4.68108 | 0.48077  | 2.68561  |
| H | -3.63157 | 1.80205  | 2.14251  |
| H | -2.92343 | 0.15075  | -3.61004 |
| H | 2.73744  | 4.0853   | 0.34951  |
| H | 5.45811  | 0.80889  | -1.25534 |

|   |         |          |          |
|---|---------|----------|----------|
| H | 3.16714 | -1.41903 | 0.69481  |
| H | 6.61681 | -1.08516 | -1.83471 |
| H | 6.53254 | -2.35754 | -0.59359 |
| H | 5.61669 | -2.53335 | -2.07564 |
| H | 2.02164 | -3.20028 | -0.55758 |
| H | 2.25037 | -1.76789 | -1.58863 |
| H | 3.28977 | -3.19865 | -1.79975 |
| H | 5.76412 | -2.04324 | 1.75148  |
| H | 4.20812 | -2.36886 | 2.55955  |
| H | 5.36231 | -3.70208 | 2.27238  |

**Compound 1c:** Isomer 2S, 5R, 11S, 13S, 17S, 23R conformer 10

|   |          |          |          |
|---|----------|----------|----------|
| C | 2.21585  | -2.08652 | 0.78186  |
| C | 2.52339  | -3.39761 | 0.61015  |
| C | 3.4612   | -3.83187 | -0.42452 |
| C | 4.10263  | -2.692   | -1.22304 |
| C | 3.16289  | -1.49566 | -1.34518 |
| O | 2.66583  | -1.10853 | -0.03671 |
| C | 1.38259  | -1.50445 | 1.886    |
| C | 2.22258  | -0.60651 | 2.83021  |
| C | 1.37638  | 0.34183  | 3.68592  |
| C | 0.53943  | 1.371    | 2.90639  |
| C | 1.35381  | 2.38183  | 2.04595  |
| C | 0.43209  | 2.94441  | 0.97293  |
| C | 1.97854  | 3.50251  | 2.88161  |
| O | 0.25559  | 2.03288  | -0.01952 |
| O | -0.11202 | 4.0278   | 0.99607  |
| C | -0.78026 | 2.3188   | -1.00831 |
| C | -0.49288 | 1.43109  | -2.22719 |
| C | -2.12546 | 2.04512  | -0.40349 |
| C | 0.69432  | 1.84184  | -3.09451 |
| C | 3.80405  | -0.24527 | -1.94224 |
| C | 2.87932  | 0.99113  | -2.01479 |
| C | 1.86712  | 0.88401  | -3.18621 |
| C | 0.6651   | 2.98337  | -3.7918  |
| C | 3.71438  | 2.27398  | -2.12844 |
| O | 3.76831  | -5.00102 | -0.61279 |
| O | 2.97383  | -1.40476 | 3.7427   |

|   |          |          |          |
|---|----------|----------|----------|
| C | -3.01688 | 2.93017  | 0.11549  |
| O | -4.09337 | 2.22956  | 0.57482  |
| C | -3.80091 | 0.91413  | 0.31244  |
| N | -2.63526 | 0.75984  | -0.26068 |
| C | -4.81104 | -0.04075 | 0.72233  |
| C | -4.85943 | -1.363   | 0.45371  |
| C | -3.80376 | -2.10074 | -0.36162 |
| C | -5.98508 | -2.20203 | 1.00122  |
| C | -2.75966 | -2.76391 | 0.54061  |
| O | -4.39302 | -3.1383  | -1.14732 |
| C | -5.04623 | -2.66394 | -2.30896 |
| H | 2.10411  | -4.14826 | 1.27087  |
| H | 5.02579  | -2.39127 | -0.70572 |
| H | 4.38882  | -3.06585 | -2.21071 |
| H | 2.27784  | -1.79807 | -1.92464 |
| H | 0.59038  | -0.91181 | 1.41427  |
| H | 0.91886  | -2.29874 | 2.47901  |
| H | 2.90982  | -0.01295 | 2.21048  |
| H | 2.0615   | 0.84624  | 4.37789  |
| H | 0.7041   | -0.26243 | 4.30931  |
| H | -0.06789 | 1.94181  | 3.62045  |
| H | -0.1719  | 0.84511  | 2.26043  |
| H | 2.13878  | 1.83234  | 1.51446  |
| H | 2.59791  | 4.16104  | 2.26389  |
| H | 2.61062  | 3.08782  | 3.67369  |
| H | 1.19915  | 4.11671  | 3.3427   |
| H | -0.70914 | 3.3777   | -1.26658 |
| H | -1.39979 | 1.44165  | -2.84397 |
| H | -0.38331 | 0.40237  | -1.87036 |
| H | 4.68237  | -0.00261 | -1.32909 |
| H | 4.18278  | -0.49563 | -2.94336 |
| H | 2.31229  | 1.03754  | -1.07961 |
| H | 2.40731  | 1.05342  | -4.12747 |
| H | 1.4738   | -0.14119 | -3.23546 |
| H | 1.4846   | 3.27825  | -4.44199 |
| H | -0.18023 | 3.66735  | -3.74591 |
| H | 4.36454  | 2.39947  | -1.2545  |
| H | 4.35593  | 2.25139  | -3.01978 |
| H | 3.0722   | 3.15738  | -2.20079 |



|   |          |          |          |
|---|----------|----------|----------|
| H | 3.51516  | -2.0195  | 3.22099  |
| H | -3.02608 | 3.99917  | 0.25291  |
| H | -5.60435 | 0.40386  | 1.31843  |
| H | -3.29002 | -1.38885 | -1.01913 |
| H | -6.65804 | -1.60939 | 1.62756  |
| H | -6.56806 | -2.66069 | 0.19523  |
| H | -5.59536 | -3.03308 | 1.60287  |
| H | -2.04325 | -3.31471 | -0.0768  |
| H | -2.22311 | -2.00379 | 1.11598  |
| H | -3.22784 | -3.47072 | 1.23358  |
| H | -5.89056 | -1.99756 | -2.07348 |
| H | -4.35216 | -2.11871 | -2.96749 |
| H | -5.42641 | -3.54045 | -2.84057 |

**Compound 1c:** Isomer 2S, 5R, 11S, 13S, 17S, 23R conformer 11

|   |          |          |          |
|---|----------|----------|----------|
| C | -1.39546 | -1.94654 | -2.15565 |
| C | -0.1021  | -2.36063 | -2.16974 |
| C | 0.46368  | -3.14762 | -1.08162 |
| C | -0.53462 | -3.51026 | 0.01551  |
| C | -1.58398 | -2.41301 | 0.16913  |
| O | -2.23279 | -2.15262 | -1.11167 |
| C | -2.05137 | -1.1779  | -3.2639  |
| C | -2.36502 | 0.29946  | -2.90722 |
| C | -1.10702 | 1.11432  | -2.59011 |
| C | -1.36179 | 2.61793  | -2.38788 |
| C | -2.21031 | 3.0256   | -1.15251 |
| C | -1.40139 | 2.90347  | 0.13293  |
| C | -2.72009 | 4.46671  | -1.29772 |
| O | -1.48761 | 1.65798  | 0.66853  |
| O | -0.75366 | 3.79877  | 0.63374  |
| C | -0.79875 | 1.44449  | 1.93777  |
| C | -1.46628 | 0.25518  | 2.66429  |
| C | 0.65636  | 1.19349  | 1.68127  |
| C | -2.98451 | 0.22995  | 2.61718  |
| C | -2.65338 | -2.74599 | 1.20822  |
| C | -3.90863 | -1.84866 | 1.26775  |
| C | -3.66397 | -0.31494 | 1.36939  |
| C | -3.69462 | 0.70179  | 3.64932  |

|   |          |          |          |
|---|----------|----------|----------|
| C | -4.8465  | -2.35301 | 2.37408  |
| O | 1.63105  | -3.52586 | -1.05107 |
| O | -3.0049  | 0.92707  | -4.01941 |
| C | 1.72471  | 2.00075  | 1.90272  |
| O | 2.84843  | 1.34026  | 1.48505  |
| C | 2.39838  | 0.13874  | 0.99951  |
| N | 1.09979  | 0.00996  | 1.1076   |
| C | 3.29422  | -0.8539  | 0.44429  |
| C | 4.62097  | -0.79446 | 0.1978   |
| C | 5.51134  | 0.40846  | 0.49625  |
| C | 5.31297  | -2.00561 | -0.37674 |
| C | 6.23312  | 0.25819  | 1.83872  |
| O | 6.525    | 0.56415  | -0.49808 |
| C | 6.04394  | 1.10819  | -1.71222 |
| H | 0.53012  | -2.13417 | -3.02081 |
| H | -1.01616 | -4.46288 | -0.25067 |
| H | 0.00552  | -3.66232 | 0.95467  |
| H | -1.06287 | -1.48255 | 0.41835  |
| H | -1.41858 | -1.19617 | -4.15654 |
| H | -2.99911 | -1.67506 | -3.51662 |
| H | -3.03628 | 0.30473  | -2.03591 |
| H | -0.40951 | 0.99958  | -3.43108 |
| H | -0.61683 | 0.67869  | -1.71286 |
| H | -1.87561 | 2.99823  | -3.27645 |
| H | -0.3982  | 3.14079  | -2.33218 |
| H | -3.06652 | 2.34665  | -1.07055 |
| H | -3.32391 | 4.76693  | -0.43488 |
| H | -3.33689 | 4.55653  | -2.19794 |
| H | -1.88253 | 5.1663   | -1.37514 |
| H | -0.91824 | 2.36044  | 2.52075  |
| H | -1.12692 | 0.30983  | 3.70556  |
| H | -1.04964 | -0.66768 | 2.25664  |
| H | -2.99306 | -3.77669 | 1.03499  |
| H | -2.15155 | -2.7567  | 2.18587  |
| H | -4.42598 | -1.98074 | 0.30807  |
| H | -3.09771 | -0.00047 | 0.48974  |
| H | -4.65124 | 0.15799  | 1.28731  |
| H | -4.78167 | 0.72305  | 3.63557  |
| H | -3.21664 | 1.08874  | 4.54678  |

|   |          |          |          |
|---|----------|----------|----------|
| H | -5.07605 | -3.4172  | 2.24269  |
| H | -4.39892 | -2.22393 | 3.36614  |
| H | -5.79552 | -1.8038  | 2.36572  |
| H | -3.85405 | 0.48249  | -4.16715 |
| H | 1.85731  | 2.99647  | 2.29354  |
| H | 2.765    | -1.76933 | 0.19426  |
| H | 4.90355  | 1.32049  | 0.52584  |
| H | 4.60151  | -2.81303 | -0.56766 |
| H | 5.83008  | -1.76055 | -1.31044 |
| H | 6.08679  | -2.37591 | 0.3091   |
| H | 6.87996  | 1.1253   | 2.00529  |
| H | 5.50833  | 0.19269  | 2.65584  |
| H | 6.85721  | -0.64114 | 1.84912  |
| H | 5.29648  | 0.46023  | -2.19473 |
| H | 5.59091  | 2.10024  | -1.55735 |
| H | 6.90536  | 1.21101  | -2.37769 |

**Compound 1c:** Isomer 2S, 5R, 11S, 13S, 17S, 23R conformer 12

|   |          |          |          |
|---|----------|----------|----------|
| C | 0.62154  | -2.32543 | 1.88626  |
| C | -0.47976 | -2.8835  | 1.31209  |
| C | -0.41786 | -3.55285 | 0.02082  |
| C | 0.98805  | -3.64719 | -0.56272 |
| C | 1.81042  | -2.41861 | -0.1776  |
| O | 1.82543  | -2.25308 | 1.27538  |
| C | 0.59078  | -1.65976 | 3.23346  |
| C | 0.05788  | -0.19476 | 3.17579  |
| C | 0.97864  | 0.74647  | 2.38963  |
| C | 0.56658  | 2.22108  | 2.49073  |
| C | 1.48258  | 3.21884  | 1.72589  |
| C | 1.22374  | 3.17246  | 0.22345  |
| C | 1.30119  | 4.6518   | 2.24012  |
| O | 1.6658   | 2.00963  | -0.31806 |
| O | 0.68379  | 4.04545  | -0.42269 |
| C | 1.36485  | 1.77379  | -1.72712 |
| C | 2.29264  | 0.6463   | -2.24278 |
| C | -0.08635 | 1.40613  | -1.8383  |
| C | 3.69884  | 0.63605  | -1.66732 |
| C | 3.24553  | -2.49002 | -0.69994 |

|   |          |          |          |
|---|----------|----------|----------|
| C | 4.28061  | -1.47346 | -0.17192 |
| C | 3.90111  | 0.03161  | -0.28372 |
| C | 4.71357  | 1.16663  | -2.36038 |
| C | 5.64802  | -1.77062 | -0.80525 |
| O | -1.396   | -4.02901 | -0.54903 |
| O | -1.28018 | -0.1508  | 2.68789  |
| C | -1.15256 | 2.16104  | -2.20738 |
| O | -2.28494 | 1.41075  | -2.03423 |
| C | -1.84698 | 0.21106  | -1.53854 |
| N | -0.54486 | 0.16305  | -1.42005 |
| C | -2.75976 | -0.8651  | -1.19874 |
| C | -4.06577 | -0.81607 | -0.86021 |
| C | -4.88975 | 0.4637   | -0.76405 |
| C | -4.78326 | -2.09958 | -0.52204 |
| C | -5.92042 | 0.57669  | -1.88915 |
| O | -5.61658 | 0.5049   | 0.46564  |
| C | -4.80922 | 0.7952   | 1.59437  |
| H | -1.42103 | -2.88428 | 1.85016  |
| H | 1.46802  | -4.55923 | -0.17823 |
| H | 0.92085  | -3.74158 | -1.65066 |
| H | 1.29149  | -1.53009 | -0.55435 |
| H | -0.07079 | -2.22437 | 3.89738  |
| H | 1.5983   | -1.6638  | 3.6634   |
| H | -0.0171  | 0.15066  | 4.2142   |
| H | 0.98435  | 0.43432  | 1.341    |
| H | 2.00809  | 0.62776  | 2.75559  |
| H | 0.57966  | 2.51946  | 3.5481   |
| H | -0.47106 | 2.3384   | 2.15583  |
| H | 2.52424  | 2.90498  | 1.87979  |
| H | 1.93933  | 5.35431  | 1.69572  |
| H | 1.55576  | 4.7053   | 3.30401  |
| H | 0.26577  | 4.98271  | 2.11357  |
| H | 1.56021  | 2.70837  | -2.25748 |
| H | 2.33408  | 0.75739  | -3.33265 |
| H | 1.79882  | -0.30814 | -2.04907 |
| H | 3.63601  | -3.49498 | -0.48823 |
| H | 3.17968  | -2.41854 | -1.79505 |
| H | 4.36951  | -1.65426 | 0.90774  |
| H | 3.00294  | 0.1983   | 0.31212  |

|   |          |          |          |
|---|----------|----------|----------|
| H | 4.70491  | 0.58714  | 0.21666  |
| H | 5.72511  | 1.19832  | -1.96319 |
| H | 4.5709   | 1.59549  | -3.34995 |
| H | 5.94585  | -2.81171 | -0.63222 |
| H | 5.6321   | -1.60025 | -1.88783 |
| H | 6.4266   | -1.12662 | -0.37933 |
| H | -1.2588  | -0.44277 | 1.75953  |
| H | -1.28262 | 3.17129  | -2.55923 |
| H | -2.26341 | -1.83157 | -1.18753 |
| H | -4.22428 | 1.33422  | -0.81003 |
| H | -5.53877 | -2.33706 | -1.28352 |
| H | -4.08588 | -2.93938 | -0.45923 |
| H | -5.32147 | -2.00018 | 0.42619  |
| H | -6.48382 | 1.50804  | -1.77598 |
| H | -5.42319 | 0.57872  | -2.86439 |
| H | -6.62919 | -0.25656 | -1.85636 |
| H | -4.04642 | 0.02589  | 1.78181  |
| H | -4.29853 | 1.76466  | 1.48377  |
| H | -5.47989 | 0.84431  | 2.45621  |

**Compound 1c:** Isomer 2S, 5R, 11S, 13S, 17S, 23R conformer 13

|   |          |          |          |
|---|----------|----------|----------|
| C | -1.93528 | -2.03967 | -1.29909 |
| C | -3.01994 | -2.73925 | -1.72667 |
| C | -3.75251 | -3.63129 | -0.83333 |
| C | -3.11258 | -3.80219 | 0.54673  |
| C | -2.40439 | -2.53134 | 1.02256  |
| O | -1.51317 | -2.02051 | -0.01402 |
| C | -1.10746 | -1.12737 | -2.1573  |
| C | -1.64797 | 0.3237   | -2.09418 |
| C | -0.64953 | 1.34057  | -2.64509 |
| C | -1.16091 | 2.79205  | -2.6246  |
| C | -1.65149 | 3.349    | -1.25975 |
| C | -0.52628 | 3.38164  | -0.23375 |
| C | -2.24056 | 4.75536  | -1.43305 |
| O | -0.37685 | 2.18489  | 0.38849  |
| O | 0.17194  | 4.34645  | 0.00432  |
| C | 0.70524  | 2.08101  | 1.36972  |
| C | 0.37759  | 0.86876  | 2.24574  |

|   |          |          |          |
|---|----------|----------|----------|
| C | 2.03547  | 1.94912  | 0.68276  |
| C | -0.83863 | 1.01045  | 3.15643  |
| C | -3.37575 | -1.42955 | 1.47479  |
| C | -2.73662 | -0.07022 | 1.82556  |
| C | -1.84574 | -0.12103 | 3.0953   |
| C | -0.98581 | 2.04346  | 3.99232  |
| C | -3.82105 | 1.00694  | 1.96951  |
| O | -4.75442 | -4.25269 | -1.16076 |
| O | -2.8579  | 0.44992  | -2.83852 |
| C | 2.88892  | 2.93469  | 0.29499  |
| O | 3.98248  | 2.35127  | -0.27386 |
| C | 3.7444   | 1.00161  | -0.20562 |
| N | 2.59161  | 0.71963  | 0.34569  |
| C | 4.79234  | 0.15539  | -0.73841 |
| C | 4.89853  | -1.18733 | -0.64733 |
| C | 3.85693  | -2.05644 | 0.03371  |
| C | 6.07164  | -1.89888 | -1.26628 |
| C | 2.76215  | -2.47791 | -0.96092 |
| O | 4.5385   | -3.19104 | 0.57622  |
| C | 3.8408   | -3.84169 | 1.61678  |
| H | -3.31193 | -2.70045 | -2.7708  |
| H | -3.87862 | -4.11254 | 1.26337  |
| H | -2.38689 | -4.62378 | 0.46767  |
| H | -1.71627 | -2.77396 | 1.83638  |
| H | -0.07626 | -1.14996 | -1.78876 |
| H | -1.11857 | -1.46291 | -3.19908 |
| H | -1.83035 | 0.56204  | -1.03953 |
| H | -0.40862 | 1.07535  | -3.68334 |
| H | 0.2767   | 1.24887  | -2.06658 |
| H | -2.00515 | 2.87168  | -3.31751 |
| H | -0.3712  | 3.45252  | -3.00638 |
| H | -2.42904 | 2.67868  | -0.87792 |
| H | -2.63026 | 5.14394  | -0.48641 |
| H | -3.06099 | 4.73184  | -2.15786 |
| H | -1.4782  | 5.45445  | -1.78932 |
| H | 0.69738  | 3.00678  | 1.94853  |
| H | 1.26406  | 0.66255  | 2.85947  |
| H | 0.26653  | 0.00235  | 1.58638  |
| H | -4.12335 | -1.27257 | 0.68578  |

|   |          |          |          |
|---|----------|----------|----------|
| H | -3.92906 | -1.82066 | 2.34101  |
| H | -2.09456 | 0.21508  | 0.98679  |
| H | -2.48789 | -0.10406 | 3.98566  |
| H | -1.29506 | -1.07181 | 3.12587  |
| H | -1.83793 | 2.11511  | 4.66332  |
| H | -0.26397 | 2.8553   | 4.04816  |
| H | -4.38726 | 1.12826  | 1.0382   |
| H | -4.53559 | 0.74521  | 2.76109  |
| H | -3.37669 | 1.97446  | 2.2241   |
| H | -3.50266 | -0.16942 | -2.45816 |
| H | 2.85645  | 4.01119  | 0.3216   |
| H | 5.57378  | 0.70836  | -1.25331 |
| H | 3.38678  | -1.48707 | 0.84575  |
| H | 6.73467  | -1.19998 | -1.78433 |
| H | 6.64151  | -2.43418 | -0.49983 |
| H | 5.73734  | -2.65894 | -1.98442 |
| H | 2.00866  | -3.10448 | -0.47162 |
| H | 2.25749  | -1.59066 | -1.35335 |
| H | 3.19304  | -3.04321 | -1.79415 |
| H | 3.60956  | -3.15116 | 2.44355  |
| H | 2.90055  | -4.30049 | 1.27599  |
| H | 4.49695  | -4.63292 | 1.98989  |

**Compound 1c:** Isomer 2S, 5R, 11S, 13S, 17S, 23R conformer 16

|   |         |          |          |
|---|---------|----------|----------|
| C | 0.75335 | 2.29315  | -1.3455  |
| C | 0.33555 | 3.56035  | -1.58824 |
| C | 0.92527 | 4.70726  | -0.90198 |
| C | 2.09411 | 4.36488  | 0.02837  |
| C | 1.94436 | 2.97297  | 0.63619  |
| O | 1.67627 | 1.99232  | -0.39992 |
| C | 0.25515 | 1.04805  | -2.03283 |
| C | 1.37268 | 0.03355  | -2.35286 |
| C | 0.81502 | -1.32648 | -2.77373 |
| C | 1.86729 | -2.44731 | -2.82932 |
| C | 2.64174 | -2.74614 | -1.51403 |
| C | 1.68554 | -3.06872 | -0.37281 |
| C | 3.6266  | -3.90472 | -1.71978 |
| O | 1.29364 | -1.94567 | 0.28084  |

|   |          |          |          |
|---|----------|----------|----------|
| O | 1.29584  | -4.181   | -0.08011 |
| C | 0.30165  | -2.10579 | 1.34497  |
| C | 0.35844  | -0.82141 | 2.17477  |
| C | -1.06459 | -2.34835 | 0.76679  |
| C | 1.5833   | -0.61975 | 3.05953  |
| C | 3.18386  | 2.48207  | 1.38604  |
| C | 3.13526  | 1.01017  | 1.85039  |
| C | 2.16327  | 0.7813   | 3.04359  |
| C | 2.08734  | -1.58684 | 3.83278  |
| C | 4.54381  | 0.5106   | 2.20157  |
| O | 0.57163  | 5.86421  | -1.08577 |
| O | 2.2172   | 0.49183  | -3.4125  |
| C | -1.66449 | -3.53714 | 0.49122  |
| O | -2.91057 | -3.2817  | 0.0019   |
| C | -3.02293 | -1.9137  | -0.0002  |
| N | -1.94076 | -1.31945 | 0.43374  |
| C | -4.30266 | -1.40812 | -0.46016 |
| C | -4.79408 | -0.15347 | -0.37634 |
| C | -4.03746 | 1.01883  | 0.23647  |
| C | -6.16818 | 0.1517   | -0.91521 |
| C | -3.51169 | 1.97889  | -0.8335  |
| O | -4.89192 | 1.78764  | 1.08727  |
| C | -5.16016 | 1.16749  | 2.33065  |
| H | -0.42236 | 3.74849  | -2.34037 |
| H | 3.02126  | 4.41721  | -0.56145 |
| H | 2.16282  | 5.12664  | 0.81081  |
| H | 1.06045  | 2.96346  | 1.29107  |
| H | -0.45682 | 0.56252  | -1.34957 |
| H | -0.28355 | 1.31789  | -2.94711 |
| H | 1.95979  | -0.09599 | -1.43934 |
| H | 0.36225  | -1.22166 | -3.76851 |
| H | 0.00806  | -1.60183 | -2.0861  |
| H | 2.61444  | -2.19508 | -3.59038 |
| H | 1.37897  | -3.37443 | -3.15677 |
| H | 3.1977   | -1.84665 | -1.22866 |
| H | 4.23012  | -4.08027 | -0.82292 |
| H | 4.30475  | -3.67956 | -2.54965 |
| H | 3.09059  | -4.8308  | -1.94731 |
| H | 0.59526  | -2.98145 | 1.92732  |



|   |          |          |          |
|---|----------|----------|----------|
| H | -0.53962 | -0.79401 | 2.80619  |
| H | 0.25208  | 0.01802  | 1.48079  |
| H | 4.04815  | 2.61321  | 0.72078  |
| H | 3.34894  | 3.14796  | 2.24484  |
| H | 2.77467  | 0.41399  | 1.0054   |
| H | 2.69544  | 0.98444  | 3.98167  |
| H | 1.33538  | 1.50213  | 2.99493  |
| H | 2.92791  | -1.40139 | 4.49637  |
| H | 1.68395  | -2.59663 | 3.84601  |
| H | 5.21172  | 0.56226  | 1.33348  |
| H | 4.99002  | 1.11363  | 3.00352  |
| H | 4.51404  | -0.53052 | 2.54005  |
| H | 2.71676  | 1.25453  | -3.082   |
| H | -1.35501 | -4.56731 | 0.5523   |
| H | -4.9228  | -2.18122 | -0.90814 |
| H | -3.18965 | 0.63704  | 0.81761  |
| H | -6.65404 | -0.74465 | -1.311   |
| H | -6.80425 | 0.58745  | -0.13744 |
| H | -6.11742 | 0.89629  | -1.72029 |
| H | -2.93978 | 2.78256  | -0.36009 |
| H | -2.86154 | 1.44962  | -1.53659 |
| H | -4.33769 | 2.43189  | -1.39108 |
| H | -5.70114 | 0.21563  | 2.21618  |
| H | -4.23316 | 0.97085  | 2.89162  |
| H | -5.78204 | 1.86097  | 2.90309  |

**Compound 1c:** Isomer 2S, 5R, 11S, 13S, 17S, 23R conformer 19

|   |          |          |         |
|---|----------|----------|---------|
| C | 1.39845  | -1.97502 | 2.12917 |
| C | 0.10633  | -2.39364 | 2.14433 |
| C | -0.46458 | -3.16399 | 1.04748 |
| C | 0.53041  | -3.51432 | -0.0565 |
| C | 1.57536  | -2.41178 | -0.2034 |
| O | 2.22871  | -2.1614  | 1.07607 |
| C | 2.06172  | -1.23261 | 3.25085 |
| C | 2.38342  | 0.23958  | 2.91909 |
| C | 1.12621  | 1.06611  | 2.59622 |
| C | 1.37681  | 2.57369  | 2.41703 |
| C | 2.22113  | 3.00631  | 1.18606 |

|   |          |          |          |
|---|----------|----------|----------|
| C | 1.40106  | 2.90591  | -0.09639 |
| C | 2.72967  | 4.44597  | 1.35043  |
| O | 1.48994  | 1.67427  | -0.65494 |
| O | 0.74749  | 3.8112   | -0.57049 |
| C | 0.79501  | 1.47731  | -1.92519 |
| C | 1.46042  | 0.29546  | -2.66561 |
| C | -0.65901 | 1.22415  | -1.66652 |
| C | 2.97869  | 0.26682  | -2.61804 |
| C | 2.64132  | -2.73126 | -1.25075 |
| C | 3.89803  | -1.83537 | -1.30104 |
| C | 3.65632  | -0.2998  | -1.37898 |
| C | 3.68992  | 0.75431  | -3.6421  |
| C | 4.83206  | -2.32484 | -2.41722 |
| O | -1.63372 | -3.53719 | 1.0132   |
| O | 3.06041  | 0.72765  | 4.08155  |
| C | -1.73017 | 2.02806  | -1.88673 |
| O | -2.85146 | 1.36233  | -1.47124 |
| C | -2.39722 | 0.16109  | -0.98823 |
| N | -1.0981  | 0.0378   | -1.09589 |
| C | -3.28898 | -0.83722 | -0.43685 |
| C | -4.61673 | -0.78575 | -0.1938  |
| C | -5.51312 | 0.41265  | -0.4922  |
| C | -5.30302 | -2.00249 | 0.37566  |
| C | -6.22991 | 0.26097  | -1.83722 |
| O | -6.53066 | 0.5604   | 0.49922  |
| C | -6.05654 | 1.10339  | 1.7165   |
| H | -0.52104 | -2.18227 | 3.00283  |
| H | 1.01676  | -4.46709 | 0.20015  |
| H | -0.01239 | -3.66046 | -0.99509 |
| H | 1.04949  | -1.48094 | -0.44193 |
| H | 1.42622  | -1.26259 | 4.14158  |
| H | 3.00861  | -1.72579 | 3.50154  |
| H | 3.06716  | 0.25036  | 2.05752  |
| H | 0.419    | 0.93858  | 3.4267   |
| H | 0.64412  | 0.65217  | 1.7035   |
| H | 1.877    | 2.95667  | 3.31706  |
| H | 0.41374  | 3.09766  | 2.37368  |
| H | 3.07614  | 2.32797  | 1.07974  |
| H | 3.33025  | 4.75869  | 0.49013  |

|   |          |          |          |
|---|----------|----------|----------|
| H | 3.35035  | 4.52952  | 2.24941  |
| H | 1.89098  | 5.14242  | 1.44001  |
| H | 0.9146   | 2.40037  | -2.49692 |
| H | 1.12096  | 0.36316  | -3.70605 |
| H | 1.04203  | -0.631   | -2.26812 |
| H | 2.98061  | -3.76445 | -1.09263 |
| H | 2.1366   | -2.72819 | -2.22702 |
| H | 4.41746  | -1.98202 | -0.34481 |
| H | 3.09053  | 0.00058  | -0.49415 |
| H | 4.64459  | 0.16964  | -1.28911 |
| H | 4.77701  | 0.77279  | -3.62772 |
| H | 3.21311  | 1.15608  | -4.53368 |
| H | 5.0608   | -3.39094 | -2.30123 |
| H | 4.38202  | -2.18161 | -3.40629 |
| H | 5.78184  | -1.77703 | -2.40366 |
| H | 3.46993  | 1.5761   | 3.85664  |
| H | -1.86692 | 3.02364  | -2.2766  |
| H | -2.7555  | -1.75058 | -0.1882  |
| H | -4.91054 | 1.32831  | -0.51799 |
| H | -4.58721 | -2.80602 | 0.56665  |
| H | -5.82466 | -1.76291 | 1.30826  |
| H | -6.07237 | -2.3756  | -0.31366 |
| H | -6.88133 | 1.1246   | -2.00392 |
| H | -5.50234 | 0.20136  | -2.65232 |
| H | -6.84864 | -0.64198 | -1.85132 |
| H | -5.30776 | 0.4577   | 2.19999  |
| H | -5.60773 | 2.09806  | 1.56587  |
| H | -6.9208  | 1.20031  | 2.37914  |

**Compound 1c:** Isomer 2S, 5R, 11S, 13S, 17S, 23R conformer 22

|   |         |          |          |
|---|---------|----------|----------|
| C | 2.906   | -2.13185 | 0.39122  |
| C | 3.70354 | -3.21367 | 0.58751  |
| C | 5.09609 | -3.22984 | 0.14391  |
| C | 5.58127 | -1.91092 | -0.46379 |
| C | 4.4521  | -1.1744  | -1.18128 |
| O | 3.29665 | -1.04215 | -0.31048 |
| C | 1.53117 | -1.94194 | 0.96442  |
| C | 1.52499 | -0.82965 | 2.04062  |

|   |          |          |          |
|---|----------|----------|----------|
| C | 0.10883  | -0.43361 | 2.45449  |
| C | 0.05713  | 0.77097  | 3.41013  |
| C | 0.63019  | 2.11099  | 2.87041  |
| C | -0.17027 | 2.59899  | 1.67091  |
| C | 0.63297  | 3.18177  | 3.96932  |
| O | 0.27358  | 2.04637  | 0.5103   |
| O | -1.10489 | 3.37124  | 1.72428  |
| C | -0.47298 | 2.39183  | -0.69563 |
| C | 0.41474  | 2.07982  | -1.91228 |
| C | -1.7599  | 1.62149  | -0.73611 |
| C | 1.79638  | 2.71075  | -1.86505 |
| C | 4.85021  | 0.21957  | -1.66936 |
| C | 3.75608  | 1.0889   | -2.34435 |
| C | 2.91757  | 1.86592  | -1.28776 |
| C | 2.00535  | 3.95077  | -2.32098 |
| C | 2.91188  | 0.28659  | -3.34568 |
| O | 5.84618  | -4.18421 | 0.2969   |
| O | 2.2097   | -1.25082 | 3.21978  |
| C | -3.02446 | 2.06055  | -0.50838 |
| O | -3.87596 | 0.99974  | -0.65566 |
| C | -3.06678 | -0.06508 | -0.9569  |
| N | -1.80176 | 0.26243  | -1.02051 |
| C | -3.60904 | -1.38646 | -1.19906 |
| C | -4.86396 | -1.85751 | -1.03687 |
| C | -6.04404 | -1.0311  | -0.53152 |
| C | -5.17628 | -3.28676 | -1.40397 |
| C | -6.87902 | -0.47362 | -1.68782 |
| O | -6.92288 | -1.82469 | 0.26588  |
| C | -6.43902 | -2.0627  | 1.57443  |
| H | 3.32626  | -4.07608 | 1.12569  |
| H | 5.97913  | -1.2863  | 0.34978  |
| H | 6.40794  | -2.11677 | -1.1502  |
| H | 4.11477  | -1.7884  | -2.02838 |
| H | 0.84787  | -1.65453 | 0.15552  |
| H | 1.17689  | -2.87689 | 1.40984  |
| H | 2.02802  | 0.04446  | 1.60573  |
| H | -0.35353 | -1.29491 | 2.95474  |
| H | -0.47418 | -0.23444 | 1.54946  |
| H | 0.61826  | 0.52176  | 4.31757  |

|   |          |          |          |
|---|----------|----------|----------|
| H | -0.98352 | 0.94172  | 3.71585  |
| H | 1.65752  | 1.93903  | 2.53177  |
| H | 1.07149  | 4.11944  | 3.61199  |
| H | 1.21625  | 2.83616  | 4.82927  |
| H | -0.38653 | 3.39818  | 4.30203  |
| H | -0.69034 | 3.46138  | -0.64577 |
| H | -0.13844 | 2.43641  | -2.78986 |
| H | 0.48856  | 0.99275  | -2.00658 |
| H | 5.28694  | 0.77407  | -0.82769 |
| H | 5.66555  | 0.05963  | -2.38819 |
| H | 4.29374  | 1.85277  | -2.92454 |
| H | 2.49938  | 1.15915  | -0.56927 |
| H | 3.61031  | 2.51176  | -0.73222 |
| H | 2.98423  | 4.42236  | -2.26831 |
| H | 1.20838  | 4.54563  | -2.76247 |
| H | 3.55306  | -0.244   | -4.06074 |
| H | 2.28     | -0.45561 | -2.84529 |
| H | 2.25909  | 0.95038  | -3.921   |
| H | 3.10252  | -1.53317 | 2.96294  |
| H | -3.46071 | 3.0061   | -0.2306  |
| H | -2.84319 | -2.06203 | -1.57136 |
| H | -5.67715 | -0.19261 | 0.0721   |
| H | -4.29945 | -3.79369 | -1.81652 |
| H | -5.53345 | -3.85248 | -0.53672 |
| H | -5.98215 | -3.33235 | -2.1476  |
| H | -7.73201 | 0.08216  | -1.28636 |
| H | -6.27506 | 0.19799  | -2.30507 |
| H | -7.26375 | -1.28163 | -2.3183  |
| H | -5.49517 | -2.62922 | 1.576    |
| H | -6.2757  | -1.12064 | 2.12082  |
| H | -7.20291 | -2.64713 | 2.09402  |

**Compound 1c:** Isomer 2S, 5R, 11S, 13S, 17S, 23R conformer 23

|   |          |         |          |
|---|----------|---------|----------|
| C | 0.18187  | 2.81215 | -1.65089 |
| C | -0.79801 | 3.68324 | -1.29475 |
| C | -0.62963 | 4.62333 | -0.19073 |
| C | 0.75084  | 4.56806 | 0.46681  |
| C | 1.29009  | 3.14331 | 0.45073  |

|   |          |          |          |
|---|----------|----------|----------|
| O | 1.29816  | 2.61691  | -0.90905 |
| C | 0.18645  | 2.05011  | -2.94869 |
| C | 0.27867  | 0.50192  | -2.92198 |
| C | 1.59808  | -0.04667 | -2.36666 |
| C | 1.81121  | -1.53472 | -2.68117 |
| C | 2.94715  | -2.20259 | -1.85091 |
| C | 2.38442  | -2.718   | -0.53214 |
| C | 3.63377  | -3.34144 | -2.61172 |
| O | 1.86119  | -1.70912 | 0.21289  |
| O | 2.35625  | -3.88009 | -0.18654 |
| C | 1.07413  | -2.09924 | 1.3778   |
| C | 0.98201  | -0.86756 | 2.27893  |
| C | -0.27132 | -2.58001 | 0.92264  |
| C | 2.29462  | -0.36546 | 2.87     |
| C | 2.71313  | 2.98455  | 0.98238  |
| C | 3.09028  | 1.52617  | 1.32176  |
| C | 2.54521  | 1.12017  | 2.72127  |
| C | 3.14525  | -1.17127 | 3.5134   |
| C | 4.60587  | 1.3036   | 1.24514  |
| O | -1.47871 | 5.43674  | 0.14914  |
| O | -0.85689 | -0.09065 | -2.2958  |
| C | -0.71676 | -3.85806 | 0.82127  |
| O | -1.99358 | -3.8265  | 0.34533  |
| C | -2.28157 | -2.4969  | 0.16942  |
| N | -1.27572 | -1.71864 | 0.48419  |
| C | -3.62272 | -2.23037 | -0.31696 |
| C | -4.3445  | -1.09404 | -0.22624 |
| C | -3.86042 | 0.17773  | 0.45861  |
| C | -5.73546 | -1.04486 | -0.80472 |
| C | -3.61369 | 1.3142   | -0.5335  |
| O | -4.84451 | 0.64736  | 1.38656  |
| C | -4.92347 | -0.11867 | 2.57311  |
| H | -1.69199 | 3.76825  | -1.90143 |
| H | 1.42874  | 5.23653  | -0.08402 |
| H | 0.67741  | 4.94271  | 1.49213  |
| H | 0.59332  | 2.50512  | 1.01604  |
| H | -0.724   | 2.31953  | -3.49196 |
| H | 1.03544  | 2.4204   | -3.54284 |
| H | 0.19686  | 0.20117  | -3.97604 |

|   |          |          |          |
|---|----------|----------|----------|
| H | 1.61422  | 0.11231  | -1.28629 |
| H | 2.43511  | 0.53681  | -2.77293 |
| H | 2.05804  | -1.64541 | -3.74517 |
| H | 0.87138  | -2.07947 | -2.52909 |
| H | 3.69048  | -1.43008 | -1.60801 |
| H | 4.40561  | -3.81994 | -2.00201 |
| H | 4.10019  | -2.95488 | -3.52418 |
| H | 2.91116  | -4.11404 | -2.8932  |
| H | 1.59781  | -2.91976 | 1.8722   |
| H | 0.28796  | -1.11266 | 3.09433  |
| H | 0.49315  | -0.07341 | 1.70548  |
| H | 3.39361  | 3.39028  | 0.2231   |
| H | 2.82893  | 3.6149   | 1.87461  |
| H | 2.62408  | 0.87837  | 0.57009  |
| H | 3.25217  | 1.46545  | 3.48677  |
| H | 1.60096  | 1.65016  | 2.9135   |
| H | 4.05694  | -0.7893  | 3.96543  |
| H | 2.96935  | -2.23913 | 3.62231  |
| H | 4.9807   | 1.4872   | 0.23141  |
| H | 5.13903  | 1.97975  | 1.92661  |
| H | 4.86448  | 0.27568  | 1.52117  |
| H | -0.68884 | -0.22593 | -1.34586 |
| H | -0.2784  | -4.82582 | 1.00298  |
| H | -4.07991 | -3.10065 | -0.78269 |
| H | -2.9283  | -0.03455 | 0.99709  |
| H | -6.05976 | -2.02569 | -1.16408 |
| H | -6.4502  | -0.67929 | -0.06035 |
| H | -5.78034 | -0.34388 | -1.64854 |
| H | -3.25955 | 2.19773  | 0.00591  |
| H | -2.86223 | 1.0223   | -1.27309 |
| H | -4.53937 | 1.58499  | -1.05166 |
| H | -5.24305 | -1.15502 | 2.38428  |
| H | -3.95653 | -0.14728 | 3.1      |
| H | -5.66287 | 0.3677   | 3.21512  |

**Compound 1c:** Isomer 2S, 5R, 11S, 13S, 17S, 23R conformer 27

|   |          |         |         |
|---|----------|---------|---------|
| C | -2.14792 | 2.65372 | 1.24769 |
| C | -1.92057 | 3.80776 | 0.56744 |

**S167**

|   |          |          |          |
|---|----------|----------|----------|
| C | -2.77686 | 4.23197  | -0.53494 |
| C | -3.95014 | 3.28699  | -0.80905 |
| C | -3.5434  | 1.8469   | -0.52554 |
| O | -3.03917 | 1.71999  | 0.83543  |
| C | -1.51176 | 2.31975  | 2.56819  |
| C | -0.57136 | 1.08789  | 2.64677  |
| C | -1.26856 | -0.26037 | 2.42323  |
| C | -0.39935 | -1.45608 | 2.84234  |
| C | -0.91716 | -2.83795 | 2.34185  |
| C | -0.37696 | -3.10992 | 0.94437  |
| C | -0.52713 | -3.9788  | 3.28723  |
| O | -0.87804 | -2.22473 | 0.0405   |
| O | 0.42759  | -3.96692 | 0.65139  |
| C | -0.26217 | -2.20813 | -1.27054 |
| C | -1.19426 | -1.39282 | -2.17313 |
| C | 1.09908  | -1.57979 | -1.17939 |
| C | -2.59393 | -1.95377 | -2.39337 |
| C | -4.65513 | 0.80876  | -0.66785 |
| C | -4.12518 | -0.63555 | -0.8052  |
| C | -3.71155 | -0.94004 | -2.27528 |
| C | -2.81812 | -3.23254 | -2.71068 |
| C | -5.14389 | -1.6675  | -0.30534 |
| O | -2.63176 | 5.27977  | -1.15146 |
| O | 0.55758  | 1.25762  | 1.80138  |
| C | 2.27754  | -1.99934 | -1.70299 |
| O | 3.23437  | -1.06673 | -1.39849 |
| C | 2.58663  | -0.10946 | -0.67107 |
| N | 1.30851  | -0.37146 | -0.52802 |
| C | 3.27005  | 1.05152  | -0.14064 |
| C | 4.57657  | 1.39029  | -0.19797 |
| C | 5.66358  | 0.57471  | -0.89359 |
| C | 5.02944  | 2.68935  | 0.41964  |
| C | 5.9033   | 1.06564  | -2.32477 |
| O | 6.91007  | 0.68449  | -0.20728 |
| C | 6.98055  | -0.10336 | 0.96655  |
| H | -1.16008 | 4.49722  | 0.91538  |
| H | -4.79428 | 3.57847  | -0.16699 |
| H | -4.26997 | 3.40198  | -1.84909 |
| H | -2.69776 | 1.59582  | -1.18467 |



|   |          |          |          |
|---|----------|----------|----------|
| H | -0.93506 | 3.19303  | 2.88645  |
| H | -2.31994 | 2.17914  | 3.30093  |
| H | -0.17924 | 1.10272  | 3.67533  |
| H | -1.53873 | -0.3437  | 1.36778  |
| H | -2.21244 | -0.28077 | 2.98433  |
| H | -0.34816 | -1.49328 | 3.93845  |
| H | 0.62943  | -1.30095 | 2.49564  |
| H | -2.01205 | -2.78525 | 2.26562  |
| H | -0.87177 | -4.94623 | 2.90972  |
| H | -0.96883 | -3.81434 | 4.27589  |
| H | 0.56011  | -4.03781 | 3.39884  |
| H | -0.16025 | -3.23814 | -1.62175 |
| H | -0.69327 | -1.27932 | -3.1443  |
| H | -1.25422 | -0.3839  | -1.74998 |
| H | -5.30429 | 0.89949  | 0.21205  |
| H | -5.27219 | 1.06335  | -1.54012 |
| H | -3.23432 | -0.72172 | -0.17129 |
| H | -4.59685 | -1.28266 | -2.82623 |
| H | -3.38716 | -0.00972 | -2.76378 |
| H | -3.82199 | -3.59926 | -2.90837 |
| H | -2.01832 | -3.96501 | -2.79221 |
| H | -5.35941 | -1.52527 | 0.76004  |
| H | -6.09202 | -1.58477 | -0.853   |
| H | -4.76537 | -2.68673 | -0.44014 |
| H | 0.45767  | 0.73064  | 0.98268  |
| H | 2.60069  | -2.86317 | -2.26113 |
| H | 2.58177  | 1.71247  | 0.379    |
| H | 5.37148  | -0.48114 | -0.92945 |
| H | 5.54174  | 3.31617  | -0.32126 |
| H | 4.18496  | 3.25275  | 0.82517  |
| H | 5.75418  | 2.51779  | 1.22297  |
| H | 6.70708  | 0.47967  | -2.78118 |
| H | 4.99535  | 0.95311  | -2.9248  |
| H | 6.20127  | 2.11897  | -2.3323  |
| H | 6.23303  | 0.19487  | 1.71734  |
| H | 6.83672  | -1.17213 | 0.74333  |
| H | 7.97983  | 0.04086  | 1.38578  |

**Compound 1c:** Isomer 2S, 5R, 11S, 13S, 17S, 23R conformer 29

|   |          |          |          |
|---|----------|----------|----------|
| C | 5.24545  | 0.35129  | 0.23434  |
| C | 5.78352  | -0.03132 | -0.95027 |
| C | 5.78144  | -1.4265  | -1.37508 |
| C | 5.2492   | -2.39888 | -0.32007 |
| C | 4.1092   | -1.77767 | 0.48604  |
| O | 4.53896  | -0.4889  | 1.03767  |
| C | 5.39301  | 1.72221  | 0.83765  |
| C | 4.07522  | 2.41007  | 1.27479  |
| C | 3.06735  | 2.55951  | 0.12299  |
| C | 1.76651  | 3.24255  | 0.56174  |
| C | 0.68604  | 3.30471  | -0.53945 |
| C | 0.29455  | 1.90977  | -1.00852 |
| C | -0.54807 | 4.09799  | -0.07445 |
| O | -0.33513 | 1.20485  | -0.03663 |
| O | 0.5195   | 1.46517  | -2.11703 |
| C | -0.79703 | -0.13128 | -0.40469 |
| C | -0.9347  | -0.93826 | 0.89588  |
| C | -2.09338 | -0.03187 | -1.15612 |
| C | 0.35629  | -1.23523 | 1.6429   |
| C | 2.79758  | -1.60209 | -0.31287 |
| C | 1.71345  | -2.67692 | -0.05454 |
| C | 1.06448  | -2.54498 | 1.3483   |
| C | 0.80943  | -0.39958 | 2.58495  |
| C | 2.20963  | -4.11343 | -0.28497 |
| O | 6.22863  | -1.81634 | -2.44542 |
| O | 3.51002  | 1.76566  | 2.41084  |
| C | -2.28054 | 0.07206  | -2.49943 |
| O | -3.62102 | 0.15686  | -2.73579 |
| C | -4.20633 | 0.09931  | -1.49526 |
| N | -3.33205 | -0.00451 | -0.52816 |
| C | -5.65317 | 0.17728  | -1.48518 |
| C | -6.48426 | 0.00437  | -0.4354  |
| C | -6.0077  | -0.31044 | 0.97772  |
| C | -7.97165 | 0.16288  | -0.6178  |
| C | -5.86146 | 0.96177  | 1.81644  |
| O | -6.93744 | -1.15571 | 1.65829  |
| C | -6.84988 | -2.51378 | 1.27337  |
| H | 6.29274  | 0.69441  | -1.57411 |

|   |          |          |          |
|---|----------|----------|----------|
| H | 4.92358  | -3.31952 | -0.80987 |
| H | 6.08391  | -2.65529 | 0.34745  |
| H | 3.92367  | -2.36396 | 1.38911  |
| H | 6.02175  | 1.63489  | 1.73418  |
| H | 5.92806  | 2.35618  | 0.12298  |
| H | 4.34561  | 3.41238  | 1.6309   |
| H | 2.84826  | 1.56878  | -0.29621 |
| H | 3.5379   | 3.13052  | -0.69026 |
| H | 1.98447  | 4.27147  | 0.88027  |
| H | 1.36634  | 2.72216  | 1.43721  |
| H | 1.10901  | 3.78614  | -1.42867 |
| H | -1.31054 | 4.14788  | -0.85962 |
| H | -0.25882 | 5.12345  | 0.18059  |
| H | -0.99998 | 3.63793  | 0.80945  |
| H | -0.04223 | -0.55676 | -1.06756 |
| H | -1.43474 | -1.87904 | 0.63274  |
| H | -1.62902 | -0.39419 | 1.54302  |
| H | 2.37424  | -0.62856 | -0.04866 |
| H | 3.01937  | -1.56925 | -1.3861  |
| H | 0.92789  | -2.49455 | -0.80048 |
| H | 0.33954  | -3.36629 | 1.45335  |
| H | 1.82772  | -2.71842 | 2.11842  |
| H | 1.70693  | -0.61689 | 3.1599   |
| H | 0.29372  | 0.52407  | 2.83116  |
| H | 2.65026  | -4.22818 | -1.28199 |
| H | 2.9648   | -4.41117 | 0.4533   |
| H | 1.38089  | -4.82606 | -0.20361 |
| H | 3.43149  | 0.8234   | 2.18484  |
| H | -1.62073 | 0.12742  | -3.34966 |
| H | -6.07716 | 0.41104  | -2.45882 |
| H | -5.0296  | -0.80463 | 0.92963  |
| H | -8.21906 | 0.46555  | -1.63943 |
| H | -8.50316 | -0.76739 | -0.38928 |
| H | -8.37134 | 0.91649  | 0.07269  |
| H | -5.55654 | 0.69298  | 2.83265  |
| H | -5.10078 | 1.61426  | 1.37866  |
| H | -6.80907 | 1.50739  | 1.87689  |
| H | -7.08292 | -2.66475 | 0.20779  |
| H | -5.84595 | -2.92341 | 1.4661   |

H -7.57947 -3.06309 1.87469

**Compound 1c:** Isomer 2S, 5R, 11S, 13S, 17S, 23R conformer 30

C -1.52704 2.67842 1.32865  
C -1.21378 3.78064 0.59823  
C -2.1221 4.31723 -0.41072  
C -3.44498 3.55471 -0.52332  
C -3.22052 2.07219 -0.25617  
O -2.58568 1.88276 1.0424  
C -0.79504 2.26094 2.57434  
C 0.00909 0.93343 2.54424  
C -0.85179 -0.32573 2.37773  
C -0.07211 -1.61719 2.66615  
C -0.78173 -2.92164 2.19512  
C -0.45584 -3.17114 0.72891  
C -0.37953 -4.13519 3.03923  
O -0.99972 -2.21277 -0.06624  
O 0.23594 -4.07107 0.3028  
C -0.55796 -2.1823 -1.4519  
C -1.56347 -1.31424 -2.20977  
C 0.82217 -1.59631 -1.51193  
C -3.01666 -1.76864 -2.19636  
C -4.47773 1.20317 -0.24799  
C -4.17741 -0.30104 -0.43619  
C -4.01613 -0.65936 -1.9451  
C -3.38692 -3.03325 -2.41847  
C -5.24876 -1.18415 0.21566  
O -1.89618 5.32542 -1.06726  
O 1.06788 0.98754 1.59654  
C 1.9962 -2.18352 -1.85283  
O 2.98683 -1.24257 -1.75703  
C 2.35953 -0.1044 -1.33427  
N 1.06926 -0.26703 -1.183  
C 3.08273 1.13625 -1.12202  
C 4.38382 1.33317 -0.82689  
C 5.39119 0.21759 -0.56655  
C 4.90164 2.73769 -0.64632  
C 6.56756 0.22953 -1.54255

|   |          |          |          |
|---|----------|----------|----------|
| O | 5.94055  | 0.37186  | 0.7455   |
| C | 5.05175  | -0.01858 | 1.78239  |
| H | -0.32851 | 4.35621  | 0.8433   |
| H | -4.15475 | 3.97103  | 0.20649  |
| H | -3.8661  | 3.7099   | -1.52114 |
| H | -2.50056 | 1.6976   | -1.      |
| H | -0.09623 | 3.06158  | 2.83289  |
| H | -1.5333  | 2.19543  | 3.38642  |
| H | 0.51164  | 0.88355  | 3.52035  |
| H | -1.247   | -0.34749 | 1.35922  |
| H | -1.72292 | -0.26535 | 3.04409  |
| H | 0.09871  | -1.69919 | 3.74781  |
| H | 0.92103  | -1.55214 | 2.20503  |
| H | -1.86694 | -2.76738 | 2.26999  |
| H | -0.86074 | -5.04955 | 2.67912  |
| H | -0.66955 | -3.97874 | 4.08376  |
| H | 0.70244  | -4.29586 | 3.00018  |
| H | -0.53541 | -3.20847 | -1.82541 |
| H | -1.21471 | -1.24067 | -3.24947 |
| H | -1.48472 | -0.30145 | -1.80198 |
| H | -4.99216 | 1.37855  | 0.70515  |
| H | -5.15711 | 1.5496   | -1.03841 |
| H | -3.22812 | -0.51264 | 0.07086  |
| H | -4.99931 | -0.92976 | -2.35087 |
| H | -3.69003 | 0.23209  | -2.50003 |
| H | -4.43496 | -3.32034 | -2.44438 |
| H | -2.66778 | -3.83214 | -2.58426 |
| H | -5.29487 | -1.01614 | 1.29798  |
| H | -6.24282 | -0.97194 | -0.19957 |
| H | -5.03392 | -2.24542 | 0.04787  |
| H | 0.73059  | 0.73769  | 0.71435  |
| H | 2.29115  | -3.17614 | -2.15206 |
| H | 2.4242   | 1.9997   | -1.17585 |
| H | 4.89181  | -0.75525 | -0.63028 |
| H | 5.61061  | 3.00009  | -1.443   |
| H | 4.09172  | 3.47205  | -0.66283 |
| H | 5.4448   | 2.82408  | 0.30033  |
| H | 7.24163  | -0.60074 | -1.31109 |
| H | 6.21413  | 0.12108  | -2.5734  |

|   |         |          |          |
|---|---------|----------|----------|
| H | 7.13646 | 1.1607   | -1.46116 |
| H | 4.11096 | 0.5494   | 1.7691   |
| H | 4.80978 | -1.09107 | 1.71469  |
| H | 5.57191 | 0.16767  | 2.72568  |

**Compound 1c:** Isomer 2S, 5R, 11S, 13S, 17S, 23R conformer 31

|   |          |          |          |
|---|----------|----------|----------|
| C | 1.4311   | -2.46552 | 1.81841  |
| C | 0.18605  | -2.9663  | 1.58771  |
| C | -0.20795 | -3.47024 | 0.27871  |
| C | 0.91396  | -3.46545 | -0.75558 |
| C | 1.85995  | -2.28935 | -0.5225  |
| O | 2.35954  | -2.3019  | 0.84963  |
| C | 1.88348  | -1.95637 | 3.15764  |
| C | 1.36205  | -0.51728 | 3.45597  |
| C | 1.85358  | 0.5194   | 2.43808  |
| C | 1.45041  | 1.9559   | 2.79501  |
| C | 2.00907  | 3.05844  | 1.85356  |
| C | 1.29655  | 3.09825  | 0.50326  |
| C | 1.93522  | 4.44058  | 2.51439  |
| O | 1.55557  | 1.98788  | -0.23392 |
| O | 0.5959   | 4.00671  | 0.10983  |
| C | 0.94786  | 1.9181   | -1.55853 |
| C | 1.73768  | 0.89363  | -2.40631 |
| C | -0.49386 | 1.52772  | -1.4238  |
| C | 3.24659  | 0.92179  | -2.23483 |
| C | 3.048    | -2.28684 | -1.48481 |
| C | 4.21521  | -1.31412 | -1.20707 |
| C | 3.84651  | 0.18927  | -1.04335 |
| C | 4.01129  | 1.5921   | -3.10528 |
| C | 5.31102  | -1.52212 | -2.26299 |
| O | -1.32896 | -3.89908 | 0.02173  |
| O | -0.05504 | -0.50126 | 3.58394  |
| C | -1.61202 | 2.28306  | -1.56655 |
| O | -2.69688 | 1.48614  | -1.31609 |
| C | -2.1744  | 0.2555   | -1.00793 |
| N | -0.86623 | 0.23787  | -1.06822 |
| C | -3.01594 | -0.87115 | -0.66717 |
| C | -4.34659 | -0.92892 | -0.44306 |

|   |          |          |          |
|---|----------|----------|----------|
| C | -5.28607 | 0.26079  | -0.55827 |
| C | -4.97568 | -2.25127 | -0.08802 |
| C | -5.82335 | 0.40276  | -1.99344 |
| O | -6.34956 | 0.05623  | 0.37512  |
| C | -7.02325 | 1.2373   | 0.75524  |
| H | -0.5163  | -3.05736 | 2.40893  |
| H | 1.46399  | -4.41496 | -0.67777 |
| H | 0.47786  | -3.41597 | -1.75767 |
| H | 1.27707  | -1.36462 | -0.60472 |
| H | 1.50481  | -2.61192 | 3.9477   |
| H | 2.97823  | -1.9641  | 3.19362  |
| H | 1.72972  | -0.25153 | 4.45474  |
| H | 1.45856  | 0.26038  | 1.45067  |
| H | 2.94779  | 0.45088  | 2.36192  |
| H | 1.81956  | 2.18373  | 3.80446  |
| H | 0.35799  | 2.03168  | 2.85056  |
| H | 3.05999  | 2.81529  | 1.64171  |
| H | 2.32665  | 5.21983  | 1.85409  |
| H | 2.51835  | 4.44496  | 3.44147  |
| H | 0.90024  | 4.70298  | 2.75495  |
| H | 1.02351  | 2.91597  | -1.99655 |
| H | 1.47447  | 1.09906  | -3.45073 |
| H | 1.34624  | -0.10039 | -2.18161 |
| H | 3.46591  | -3.30272 | -1.51144 |
| H | 2.63917  | -2.10459 | -2.48865 |
| H | 4.63348  | -1.6031  | -0.23371 |
| H | 3.17205  | 0.28459  | -0.1908  |
| H | 4.77431  | 0.70253  | -0.75908 |
| H | 5.09114  | 1.65127  | -2.99266 |
| H | 3.58739  | 2.11166  | -3.96206 |
| H | 5.62795  | -2.57112 | -2.30207 |
| H | 4.96167  | -1.23747 | -3.26204 |
| H | 6.1956   | -0.91518 | -2.03624 |
| H | -0.42586 | -0.71275 | 2.70939  |
| H | -1.80577 | 3.31786  | -1.79733 |
| H | -2.44196 | -1.78856 | -0.57397 |
| H | -4.75084 | 1.18029  | -0.28939 |
| H | -5.75003 | -2.52731 | -0.81627 |
| H | -4.22662 | -3.04652 | -0.05178 |

|   |          |          |          |
|---|----------|----------|----------|
| H | -5.47966 | -2.18374 | 0.8816   |
| H | -6.5274  | 1.23885  | -2.06552 |
| H | -5.002   | 0.59147  | -2.69099 |
| H | -6.34364 | -0.51058 | -2.29981 |
| H | -7.75345 | 0.95177  | 1.51739  |
| H | -6.33089 | 1.97857  | 1.18575  |
| H | -7.55933 | 1.70994  | -0.08151 |

**Compound 1cc:** Isomer 2S, 5R, 11S, 13S, 17S, 23R conformer 38

|   |          |          |          |
|---|----------|----------|----------|
| C | -1.96066 | 2.36044  | 0.76331  |
| C | -2.17945 | 3.69382  | 0.64622  |
| C | -3.41179 | 4.2222   | 0.06868  |
| C | -4.45168 | 3.15865  | -0.30192 |
| C | -3.79313 | 1.84507  | -0.71406 |
| O | -2.82138 | 1.43051  | 0.28114  |
| C | -0.75275 | 1.71278  | 1.38918  |
| C | -1.09395 | 0.46261  | 2.2261   |
| C | 0.15165  | -0.33713 | 2.60884  |
| C | -0.15054 | -1.72084 | 3.21069  |
| C | -0.97197 | -2.70363 | 2.32865  |
| C | -0.30373 | -2.91367 | 0.97633  |
| C | -1.15176 | -4.0499  | 3.0429   |
| O | -0.73847 | -2.00593 | 0.06401  |
| O | 0.52846  | -3.76165 | 0.72834  |
| C | -0.09028 | -2.01316 | -1.24473 |
| C | -0.99237 | -1.19449 | -2.17202 |
| C | 1.28735  | -1.42339 | -1.14672 |
| C | -2.33164 | -1.80876 | -2.56185 |
| C | -4.77034 | 0.6795   | -0.87648 |
| C | -4.11901 | -0.70084 | -1.11187 |
| C | -3.50697 | -0.85083 | -2.53459 |
| C | -2.46212 | -3.08356 | -2.94271 |
| C | -5.12927 | -1.82474 | -0.84133 |
| O | -3.64383 | 5.41675  | -0.06347 |
| O | -1.76839 | 0.80402  | 3.44153  |
| C | 2.48486  | -2.06313 | -1.11675 |
| O | 3.4706   | -1.11766 | -1.03938 |
| C | 2.81067  | 0.08294  | -1.01005 |



|   |          |          |          |
|---|----------|----------|----------|
| N | 1.51076  | -0.0536  | -1.07702 |
| C | 3.52449  | 1.34182  | -0.94566 |
| C | 4.8354   | 1.59072  | -0.73877 |
| C | 5.89884  | 0.51874  | -0.51506 |
| C | 5.33444  | 3.01375  | -0.75845 |
| C | 6.62466  | 0.16344  | -1.81605 |
| O | 6.89533  | 0.96712  | 0.40315  |
| C | 6.47797  | 0.92819  | 1.7551   |
| H | -1.44941 | 4.39939  | 1.02687  |
| H | -5.09464 | 2.9952   | 0.57562  |
| H | -5.08752 | 3.54506  | -1.10422 |
| H | -3.221   | 2.00942  | -1.6393  |
| H | -0.08742 | 1.40111  | 0.57046  |
| H | -0.21591 | 2.44391  | 2.00259  |
| H | -1.73814 | -0.17017 | 1.60924  |
| H | 0.72541  | 0.24473  | 3.34246  |
| H | 0.78478  | -0.43995 | 1.72119  |
| H | -0.70766 | -1.58648 | 4.14464  |
| H | 0.79846  | -2.20766 | 3.47107  |
| H | -1.95566 | -2.26048 | 2.14096  |
| H | -1.78991 | -4.72677 | 2.46472  |
| H | -1.61536 | -3.89812 | 4.02343  |
| H | -0.18564 | -4.543   | 3.18554  |
| H | -0.00841 | -3.05404 | -1.56515 |
| H | -0.42179 | -0.98459 | -3.08709 |
| H | -1.14742 | -0.22237 | -1.69444 |
| H | -5.38159 | 0.62967  | 0.03493  |
| H | -5.45815 | 0.92272  | -1.6987  |
| H | -3.3064  | -0.80485 | -0.38521 |
| H | -4.28954 | -1.18676 | -3.22691 |
| H | -3.16876 | 0.12809  | -2.90148 |
| H | -3.41936 | -3.48339 | -3.26711 |
| H | -1.6265  | -3.7796  | -2.95459 |
| H | -5.48322 | -1.79933 | 0.19612  |
| H | -6.00599 | -1.73584 | -1.49654 |
| H | -4.67585 | -2.80607 | -1.01687 |
| H | -2.64811 | 1.13722  | 3.20585  |
| H | 2.79247  | -3.09596 | -1.11867 |
| H | 2.85258  | 2.18248  | -1.09869 |

|   |         |          |          |
|---|---------|----------|----------|
| H | 5.43137 | -0.38933 | -0.11607 |
| H | 4.52866 | 3.71614  | -0.98913 |
| H | 5.78014 | 3.29379  | 0.20208  |
| H | 6.12657 | 3.13973  | -1.50747 |
| H | 7.39682 | -0.58407 | -1.60962 |
| H | 5.92    | -0.24481 | -2.5465  |
| H | 7.10963 | 1.04489  | -2.24777 |
| H | 5.62126 | 1.59165  | 1.94892  |
| H | 6.19933 | -0.09229 | 2.06103  |
| H | 7.32633 | 1.26102  | 2.35884  |

**Compound 1c:** Isomer 2S, 5R, 11S, 13S, 17S, 23R conformer 42

|   |          |          |          |
|---|----------|----------|----------|
| C | -0.5658  | 2.26511  | 1.42417  |
| C | -0.0333  | 3.48346  | 1.69276  |
| C | -0.52023 | 4.69481  | 1.03726  |
| C | -1.7213  | 4.48055  | 0.10969  |
| C | -1.69369 | 3.09712  | -0.5341  |
| O | -1.51561 | 2.0713   | 0.47754  |
| C | -0.17432 | 0.96469  | 2.07633  |
| C | -1.36863 | 0.03475  | 2.37345  |
| C | -0.91686 | -1.37624 | 2.75199  |
| C | -2.05169 | -2.41489 | 2.77151  |
| C | -2.83829 | -2.61457 | 1.44494  |
| C | -1.90395 | -2.97383 | 0.2962   |
| C | -3.91001 | -3.69997 | 1.61157  |
| O | -1.4144  | -1.86442 | -0.3127  |
| O | -1.60885 | -4.10359 | -0.03767 |
| C | -0.44567 | -2.06755 | -1.39207 |
| C | -0.40587 | -0.75473 | -2.17723 |
| C | 0.90165  | -2.44479 | -0.84152 |
| C | -1.60883 | -0.43518 | -3.05738 |
| C | -2.96667 | 2.73392  | -1.29957 |
| C | -3.03444 | 1.27734  | -1.80823 |
| C | -2.07753 | 1.0061   | -3.00479 |
| C | -2.18502 | -1.3389  | -3.85647 |
| C | -4.47639 | 0.90266  | -2.17821 |
| O | -0.05884 | 5.80981  | 1.24087  |
| O | -2.17009 | 0.52704  | 3.45112  |

|   |          |          |          |
|---|----------|----------|----------|
| C | 1.38675  | -3.68985 | -0.5891  |
| O | 2.66483  | -3.5643  | -0.13338 |
| C | 2.91469  | -2.2146  | -0.12861 |
| N | 1.88546  | -1.51068 | -0.5278  |
| C | 4.25425  | -1.84509 | 0.28422  |
| C | 4.85663  | -0.63972 | 0.20761  |
| C | 4.16193  | 0.6111   | -0.29689 |
| C | 6.28298  | -0.47746 | 0.66147  |
| C | 3.58094  | 1.42103  | 0.87501  |
| O | 5.13538  | 1.36543  | -1.02492 |
| C | 4.5857   | 2.31844  | -1.91087 |
| H | 0.7418   | 3.58421  | 2.44425  |
| H | -2.63706 | 4.59594  | 0.70819  |
| H | -1.72888 | 5.26561  | -0.65243 |
| H | -0.81101 | 3.02745  | -1.1872  |
| H | 0.49308  | 0.44096  | 1.37675  |
| H | 0.38812  | 1.1629   | 2.99449  |
| H | -1.96779 | -0.02184 | 1.46023  |
| H | -0.46051 | -1.33662 | 3.74987  |
| H | -0.13142 | -1.69192 | 2.05677  |
| H | -2.78178 | -2.12853 | 3.53704  |
| H | -1.63702 | -3.38556 | 3.07321  |
| H | -3.32266 | -1.66732 | 1.18487  |
| H | -4.5179  | -3.80374 | 0.70656  |
| H | -4.57567 | -3.44707 | 2.44361  |
| H | -3.44806 | -4.67033 | 1.81563  |
| H | -0.81734 | -2.89453 | -2.00024 |
| H | 0.49471  | -0.76975 | -2.80517 |
| H | -0.24304 | 0.05105  | -1.45454 |
| H | -3.81982 | 2.91504  | -0.63169 |
| H | -3.0734  | 3.43688  | -2.1378  |
| H | -2.72693 | 0.62947  | -0.98043 |
| H | -2.58725 | 1.27661  | -3.93825 |
| H | -1.19559 | 1.65788  | -2.93468 |
| H | -3.00613 | -1.07089 | -4.51631 |
| H | -1.8624  | -2.37657 | -3.89613 |
| H | -5.14303 | 0.98386  | -1.31142 |
| H | -4.86814 | 1.56122  | -2.96479 |
| H | -4.52747 | -0.12774 | -2.54549 |

|   |          |          |          |
|---|----------|----------|----------|
| H | -2.61615 | 1.33131  | 3.14352  |
| H | 0.97458  | -4.68334 | -0.6499  |
| H | 4.82339  | -2.68555 | 0.67351  |
| H | 3.34212  | 0.32481  | -0.96751 |
| H | 6.68763  | -1.41468 | 1.05421  |
| H | 6.90811  | -0.13692 | -0.17047 |
| H | 6.36538  | 0.28998  | 1.44194  |
| H | 3.04782  | 2.30792  | 0.517    |
| H | 2.87287  | 0.80908  | 1.44113  |
| H | 4.37915  | 1.7496   | 1.54889  |
| H | 3.89547  | 1.85084  | -2.63128 |
| H | 4.04907  | 3.12404  | -1.38835 |
| H | 5.4233   | 2.75853  | -2.4589  |

**Compound 1c:** Isomer 2S, 5R, 11S, 13S, 17S, 23R conformer 46

|   |          |          |          |
|---|----------|----------|----------|
| C | -0.84672 | 2.31585  | 1.31059  |
| C | -0.48887 | 3.607    | 1.51916  |
| C | -1.14527 | 4.70518  | 0.81748  |
| C | -2.31406 | 4.27837  | -0.07679 |
| C | -2.09292 | 2.88927  | -0.66876 |
| O | -1.74252 | 1.93983  | 0.36982  |
| C | -0.2719  | 1.11962  | 2.02427  |
| C | -1.32141 | 0.06429  | 2.39557  |
| C | -0.68532 | -1.28615 | 2.75932  |
| C | -1.68572 | -2.45156 | 2.86291  |
| C | -2.49513 | -2.79568 | 1.57941  |
| C | -1.55984 | -3.1078  | 0.41667  |
| C | -3.43661 | -3.98059 | 1.83179  |
| O | -1.21597 | -1.98439 | -0.25817 |
| O | -1.15039 | -4.21472 | 0.13157  |
| C | -0.23882 | -2.13018 | -1.34041 |
| C | -0.34846 | -0.85936 | -2.18564 |
| C | 1.14267  | -2.32902 | -0.78413 |
| C | -1.59018 | -0.71596 | -3.05881 |
| C | -3.31922 | 2.31623  | -1.38181 |
| C | -3.19603 | 0.84298  | -1.82622 |
| C | -2.23878 | 0.65397  | -3.03751 |
| C | -2.05177 | -1.7072  | -3.82818 |

|   |          |          |          |
|---|----------|----------|----------|
| C | -4.58019 | 0.25695  | -2.13825 |
| O | -0.84734 | 5.88362  | 0.96288  |
| O | -2.08248 | 0.60492  | 3.48265  |
| C | 1.78864  | -3.49888 | -0.53331 |
| O | 3.0318   | -3.20533 | -0.05886 |
| C | 3.09495  | -1.83385 | -0.03959 |
| N | 1.98606  | -1.27345 | -0.45037 |
| C | 4.36262  | -1.29    | 0.40974  |
| C | 4.80547  | -0.01618 | 0.34652  |
| C | 3.99435  | 1.14146  | -0.22322 |
| C | 6.1773   | 0.3274   | 0.86764  |
| C | 3.45169  | 2.05226  | 0.88097  |
| O | 4.80439  | 1.96346  | -1.06725 |
| C | 5.07118  | 1.38763  | -2.33204 |
| H | 0.25841  | 3.85     | 2.26612  |
| H | -3.22558 | 4.27981  | 0.5386   |
| H | -2.45032 | 5.0215   | -0.86827 |
| H | -1.2265  | 2.92514  | -1.3463  |
| H | 0.45699  | 0.65045  | 1.34902  |
| H | 0.26223  | 1.44626  | 2.92251  |
| H | -1.9666  | -0.07003 | 1.52166  |
| H | -0.17356 | -1.17522 | 3.7241   |
| H | 0.08335  | -1.53018 | 2.01812  |
| H | -2.41409 | -2.24159 | 3.65925  |
| H | -1.14867 | -3.3548  | 3.17941  |
| H | -3.08634 | -1.91965 | 1.28959  |
| H | -4.05835 | -4.18927 | 0.95494  |
| H | -4.09956 | -3.76569 | 2.67694  |
| H | -2.86496 | -4.8854  | 2.05762  |
| H | -0.5197  | -3.02072 | -1.90606 |
| H | 0.54095  | -0.8112  | -2.82779 |
| H | -0.26392 | -0.00716 | -1.50441 |
| H | -4.17272 | 2.40711  | -0.69659 |
| H | -3.5434  | 2.95759  | -2.24602 |
| H | -2.78245 | 0.28238  | -0.98112 |
| H | -2.79912 | 0.82431  | -3.96574 |
| H | -1.44736 | 1.41552  | -3.00906 |
| H | -2.90726 | -1.56425 | -4.48311 |
| H | -1.59707 | -2.69499 | -3.84732 |

|   |          |          |          |
|---|----------|----------|----------|
| H | -5.2317  | 0.28709  | -1.25671 |
| H | -5.07752 | 0.81875  | -2.94011 |
| H | -4.49866 | -0.78691 | -2.45987 |
| H | -2.89722 | 0.08712  | 3.56424  |
| H | 1.51584  | -4.53882 | -0.60426 |
| H | 5.01885  | -2.04886 | 0.82979  |
| H | 3.15145  | 0.74274  | -0.80004 |
| H | 6.7018   | -0.55851 | 1.23676  |
| H | 6.78333  | 0.80063  | 0.08776  |
| H | 6.11465  | 1.05408  | 1.68803  |
| H | 2.83326  | 2.84004  | 0.44045  |
| H | 2.8428   | 1.47815  | 1.58574  |
| H | 4.27001  | 2.52856  | 1.43042  |
| H | 5.65817  | 2.118    | -2.89532 |
| H | 5.64676  | 0.45248  | -2.25378 |
| H | 4.14147  | 1.17417  | -2.88223 |

**Compound 1c:** Isomer 2S, 5R, 11S, 13S, 17S, 23R conformer 49

|   |          |          |          |
|---|----------|----------|----------|
| C | -2.32167 | 2.65158  | 1.16352  |
| C | -2.13369 | 3.80825  | 0.47586  |
| C | -2.97846 | 4.17678  | -0.65484 |
| C | -4.09475 | 3.17132  | -0.95046 |
| C | -3.62705 | 1.7563   | -0.63593 |
| O | -3.15541 | 1.67097  | 0.73972  |
| C | -1.70425 | 2.36331  | 2.50361  |
| C | -0.72296 | 1.16741  | 2.62348  |
| C | -1.36948 | -0.20818 | 2.41526  |
| C | -0.47439 | -1.36621 | 2.88262  |
| C | -0.94499 | -2.7747  | 2.40973  |
| C | -0.35836 | -3.07494 | 1.037    |
| C | -0.557   | -3.87781 | 3.39968  |
| O | -0.84573 | -2.22282 | 0.09437  |
| O | 0.46861  | -3.92552 | 0.79193  |
| C | -0.18223 | -2.22309 | -1.19318 |
| C | -1.09463 | -1.44579 | -2.14824 |
| C | 1.16383  | -1.56942 | -1.06304 |
| C | -2.47001 | -2.04634 | -2.41341 |
| C | -4.6852  | 0.66572  | -0.79361 |

|   |          |          |          |
|---|----------|----------|----------|
| C | -4.08854 | -0.75563 | -0.89101 |
| C | -3.61953 | -1.06437 | -2.34302 |
| C | -2.64674 | -3.33388 | -2.72558 |
| C | -5.07577 | -1.82302 | -0.40274 |
| O | -2.86854 | 5.22376  | -1.28014 |
| O | 0.41112  | 1.36517  | 1.79128  |
| C | 2.36583  | -1.97019 | -1.54569 |
| O | 3.29692  | -1.02176 | -1.20926 |
| C | 2.60872  | -0.07449 | -0.50517 |
| N | 1.33058  | -0.35718 | -0.40688 |
| C | 3.25907  | 1.08878  | 0.05812  |
| C | 4.56202  | 1.44479  | 0.04112  |
| C | 5.65858  | 0.65737  | -0.65946 |
| C | 4.99013  | 2.7223   | 0.7144   |
| C | 5.77589  | 1.0744   | -2.13655 |
| O | 6.8764   | 0.90369  | 0.04681  |
| C | 7.87027  | -0.08067 | -0.14785 |
| H | -1.4171  | 4.538    | 0.83458  |
| H | -4.97128 | 3.42817  | -0.33762 |
| H | -4.38857 | 3.25789  | -2.0009  |
| H | -2.7525  | 1.53769  | -1.26843 |
| H | -1.16643 | 3.26228  | 2.81847  |
| H | -2.52278 | 2.20669  | 3.22155  |
| H | -0.35127 | 1.21526  | 3.65893  |
| H | -1.61233 | -0.32352 | 1.35626  |
| H | -2.32521 | -0.24653 | 2.95494  |
| H | -0.44369 | -1.37294 | 3.98007  |
| H | 0.55641  | -1.19166 | 2.55164  |
| H | -2.03815 | -2.75041 | 2.30082  |
| H | -0.86715 | -4.86387 | 3.041    |
| H | -1.03214 | -3.69546 | 4.36953  |
| H | 0.52745  | -3.9069  | 3.54516  |
| H | -0.0503  | -3.25826 | -1.51822 |
| H | -0.55673 | -1.33838 | -3.10011 |
| H | -1.19666 | -0.43114 | -1.74746 |
| H | -5.36412 | 0.74045  | 0.06506  |
| H | -5.28646 | 0.87914  | -1.68772 |
| H | -3.21351 | -0.79293 | -0.23089 |
| H | -4.47658 | -1.43897 | -2.91739 |

|   |          |          |          |
|---|----------|----------|----------|
| H | -3.30679 | -0.13024 | -2.83185 |
| H | -3.63249 | -3.73123 | -2.95303 |
| H | -1.8239  | -4.04379 | -2.7713  |
| H | -5.33062 | -1.67135 | 0.65262  |
| H | -6.0091  | -1.79264 | -0.98047 |
| H | -4.6485  | -2.82645 | -0.50617 |
| H | 0.37123  | 0.78442  | 1.00457  |
| H | 2.72207  | -2.8295  | -2.09046 |
| H | 2.5511   | 1.72797  | 0.57805  |
| H | 5.43231  | -0.41483 | -0.61086 |
| H | 5.50613  | 3.38584  | 0.00846  |
| H | 4.1334   | 3.25629  | 1.13365  |
| H | 5.70862  | 2.51023  | 1.51287  |
| H | 6.59079  | 0.53413  | -2.63018 |
| H | 4.84889  | 0.8509   | -2.67284 |
| H | 5.97843  | 2.14742  | -2.21689 |
| H | 7.50732  | -1.08317 | 0.12979  |
| H | 8.23389  | -0.11875 | -1.18556 |
| H | 8.70749  | 0.18501  | 0.50315  |

**Compound 1c:** Isomer 2S, 5R, 11S, 13S, 17S, 23R conformer 51

|   |         |          |          |
|---|---------|----------|----------|
| C | 0.88478 | 2.30319  | -1.28625 |
| C | 0.57817 | 3.6043   | -1.51549 |
| C | 1.27801 | 4.68533  | -0.82898 |
| C | 2.43293 | 4.22458  | 0.06584  |
| C | 2.16282 | 2.85374  | 0.6806   |
| O | 1.76067 | 1.90406  | -0.3394  |
| C | 0.27753 | 1.11825  | -1.99015 |
| C | 1.31326 | 0.04176  | -2.37373 |
| C | 0.65626 | -1.2903  | -2.76197 |
| C | 1.64792 | -2.4606  | -2.87636 |
| C | 2.4466  | -2.82041 | -1.59126 |
| C | 1.5077  | -3.12195 | -0.43003 |
| C | 3.37149 | -4.01746 | -1.84759 |
| O | 1.17686 | -1.99333 | 0.24718  |
| O | 1.0811  | -4.22205 | -0.14325 |
| C | 0.19917 | -2.12907 | 1.32838  |
| C | 0.32551 | -0.8637  | 2.18021  |



|   |          |          |          |
|---|----------|----------|----------|
| C | -1.18544 | -2.30662 | 0.77173  |
| C | 1.56538  | -0.74479 | 3.05999  |
| C | 3.37588  | 2.24255  | 1.38541  |
| C | 3.21274  | 0.77382  | 1.83196  |
| C | 2.2454   | 0.60987  | 3.03862  |
| C | 1.99916  | -1.74403 | 3.83518  |
| C | 4.58088  | 0.15462  | 2.15048  |
| O | 1.02487  | 5.87213  | -0.99036 |
| O | 2.21963  | 0.50308  | -3.37675 |
| C | -1.84806 | -3.46653 | 0.51825  |
| O | -3.08737 | -3.15446 | 0.04489  |
| C | -3.13114 | -1.78249 | 0.02899  |
| N | -2.01421 | -1.23852 | 0.44028  |
| C | -4.39158 | -1.21944 | -0.41727 |
| C | -4.8175  | 0.05978  | -0.34742 |
| C | -3.99031 | 1.2035   | 0.22718  |
| C | -6.18553 | 0.42403  | -0.86469 |
| C | -3.43267 | 2.11     | -0.87325 |
| O | -4.78883 | 2.03491  | 1.07266  |
| C | -5.06317 | 1.46029  | 2.33658  |
| H | -0.16142 | 3.86668  | -2.26379 |
| H | 3.33973  | 4.18055  | -0.55482 |
| H | 2.6039   | 4.97301  | 0.84544  |
| H | 1.30735  | 2.93335  | 1.36809  |
| H | -0.44888 | 0.65992  | -1.30403 |
| H | -0.27909 | 1.45853  | -2.87241 |
| H | 1.94182  | -0.11848 | -1.49825 |
| H | 0.14437  | -1.16845 | -3.72938 |
| H | -0.12652 | -1.52821 | -2.0335  |
| H | 2.3849   | -2.22596 | -3.6535  |
| H | 1.10728  | -3.35677 | -3.20734 |
| H | 3.051    | -1.95284 | -1.30637 |
| H | 3.99115  | -4.23674 | -0.97173 |
| H | 4.03623  | -3.80589 | -2.69176 |
| H | 2.78862  | -4.91457 | -2.07622 |
| H | 0.46668  | -3.02563 | 1.89104  |
| H | -0.56591 | -0.80419 | 2.81861  |
| H | 0.25862  | -0.00683 | 1.50295  |
| H | 4.22637  | 2.30566  | 0.69365  |

|   |          |          |          |
|---|----------|----------|----------|
| H | 3.62586  | 2.87788  | 2.24708  |
| H | 2.79024  | 0.2224   | 0.98546  |
| H | 2.80469  | 0.7697   | 3.96936  |
| H | 1.47156  | 1.3891   | 3.00438  |
| H | 2.85432  | -1.61929 | 4.49421  |
| H | 1.52154  | -2.72098 | 3.85415  |
| H | 5.23595  | 0.16782  | 1.27141  |
| H | 5.08824  | 0.70455  | 2.95438  |
| H | 4.47228  | -0.88673 | 2.47215  |
| H | 1.70491  | 0.66947  | -4.18361 |
| H | -1.58942 | -4.51028 | 0.58612  |
| H | -5.05857 | -1.9675  | -0.83981 |
| H | -3.15376 | 0.79057  | 0.8033   |
| H | -6.72112 | -0.45281 | -1.23953 |
| H | -6.78519 | 0.89871  | -0.08077 |
| H | -6.11547 | 1.1559   | -1.6799  |
| H | -2.80239 | 2.88645  | -0.42935 |
| H | -2.83222 | 1.52854  | -1.57931 |
| H | -4.24301 | 2.60101  | -1.42167 |
| H | -5.65018 | 0.53251  | 2.2564   |
| H | -4.13633 | 1.23451  | 2.88657  |
| H | -5.64128 | 2.19695  | 2.90081  |

**Compound 1c:** Isomer 2S, 5R, 11S, 13S, 17S, 23R conformer 52

|   |          |          |          |
|---|----------|----------|----------|
| C | 2.93583  | -2.10803 | 0.57774  |
| C | 3.69035  | -3.22144 | 0.74947  |
| C | 5.06582  | -3.29301 | 0.26447  |
| C | 5.57263  | -1.9995  | -0.37943 |
| C | 4.43939  | -1.26006 | -1.08581 |
| O | 3.32954  | -1.05341 | -0.17247 |
| C | 1.5835   | -1.86292 | 1.18476  |
| C | 1.57044  | -0.61116 | 2.08951  |
| C | 0.15135  | -0.22927 | 2.52907  |
| C | 0.09521  | 1.05057  | 3.38059  |
| C | 0.63947  | 2.34773  | 2.72199  |
| C | -0.17821 | 2.7212   | 1.49333  |
| C | 0.6346   | 3.50775  | 3.72627  |
| O | 0.26178  | 2.07553  | 0.38112  |

|   |          |          |          |
|---|----------|----------|----------|
| O | -1.11928 | 3.48751  | 1.48936  |
| C | -0.48538 | 2.32474  | -0.84833 |
| C | 0.40527  | 1.92287  | -2.03581 |
| C | -1.77146 | 1.55204  | -0.83046 |
| C | 1.78631  | 2.55738  | -2.03072 |
| C | 4.85028  | 0.09636  | -1.65925 |
| C | 3.76249  | 0.92733  | -2.39081 |
| C | 2.90727  | 1.7579   | -1.3908  |
| C | 1.99441  | 3.76154  | -2.57471 |
| C | 2.93003  | 0.07081  | -3.35676 |
| O | 5.78841  | -4.27067 | 0.40738  |
| O | 2.45694  | -0.75725 | 3.1993   |
| C | -3.03523 | 2.00561  | -0.62729 |
| O | -3.88787 | 0.93835  | -0.70454 |
| C | -3.08007 | -0.14391 | -0.94099 |
| N | -1.81495 | 0.17756  | -1.02748 |
| C | -3.62519 | -1.47589 | -1.10675 |
| C | -4.88178 | -1.93303 | -0.91989 |
| C | -6.05795 | -1.07593 | -0.45865 |
| C | -5.20048 | -3.37766 | -1.21387 |
| C | -6.8842  | -0.56548 | -1.64258 |
| O | -6.94593 | -1.82538 | 0.37091  |
| C | -6.47031 | -2.00455 | 1.69148  |
| H | 3.30806  | -4.05523 | 1.32761  |
| H | 5.99728  | -1.36593 | 0.41281  |
| H | 6.37818  | -2.23947 | -1.07978 |
| H | 4.04981  | -1.90496 | -1.88657 |
| H | 0.85409  | -1.7117  | 0.37748  |
| H | 1.26975  | -2.74599 | 1.75523  |
| H | 1.99656  | 0.21224  | 1.51336  |
| H | -0.27481 | -1.05648 | 3.11857  |
| H | -0.47772 | -0.13127 | 1.63735  |
| H | 0.68248  | 0.88897  | 4.2917   |
| H | -0.94118 | 1.22957  | 3.69552  |
| H | 1.66681  | 2.16192  | 2.39169  |
| H | 1.05468  | 4.41753  | 3.28496  |
| H | 1.23253  | 3.24663  | 4.60579  |
| H | -0.38497 | 3.73702  | 4.05004  |
| H | -0.70453 | 3.3946   | -0.88002 |

|   |          |          |          |
|---|----------|----------|----------|
| H | -0.14575 | 2.21208  | -2.93919 |
| H | 0.48025  | 0.83184  | -2.04807 |
| H | 5.29145  | 0.69836  | -0.8535  |
| H | 5.66287  | -0.11431 | -2.36793 |
| H | 4.30536  | 1.65958  | -3.00594 |
| H | 2.48771  | 1.08922  | -0.63787 |
| H | 3.58783  | 2.44007  | -0.86481 |
| H | 2.97238  | 4.23745  | -2.55342 |
| H | 1.19792  | 4.32139  | -3.06068 |
| H | 3.579    | -0.50225 | -4.03076 |
| H | 2.28764  | -0.6405  | -2.82513 |
| H | 2.28723  | 0.70174  | -3.97866 |
| H | 2.13483  | -1.49721 | 3.74027  |
| H | -3.46973 | 2.96731  | -0.40847 |
| H | -2.86166 | -2.1728  | -1.44265 |
| H | -5.68705 | -0.21328 | 0.10753  |
| H | -4.32518 | -3.90983 | -1.59688 |
| H | -5.56444 | -3.8968  | -0.32073 |
| H | -6.00378 | -3.45651 | -1.95753 |
| H | -7.73303 | 0.01647  | -1.27046 |
| H | -6.27186 | 0.07085  | -2.28819 |
| H | -7.27483 | -1.39834 | -2.23603 |
| H | -5.5297  | -2.5757  | 1.72462  |
| H | -6.30433 | -1.03891 | 2.19422  |
| H | -7.24017 | -2.55989 | 2.23372  |

**Compound 1c:** Isomer 2S, 5R, 11S, 13S, 17S, 23R conformer 55

|   |          |          |          |
|---|----------|----------|----------|
| C | -2.38803 | 2.32716  | 1.43987  |
| C | -2.26244 | 3.51798  | 0.79827  |
| C | -3.14674 | 3.89738  | -0.30066 |
| C | -4.21397 | 2.85061  | -0.63616 |
| C | -3.66445 | 1.45262  | -0.3863  |
| O | -3.2     | 1.3383   | 0.9905   |
| C | -1.71087 | 1.99194  | 2.74123  |
| C | -0.62427 | 0.87896  | 2.7374   |
| C | -1.17024 | -0.51239 | 2.39507  |
| C | -0.16866 | -1.65577 | 2.61764  |
| C | -0.60152 | -3.01073 | 1.97652  |

|   |          |          |          |
|---|----------|----------|----------|
| C | -0.1885  | -3.05378 | 0.50902  |
| C | -0.01398 | -4.2145  | 2.72053  |
| O | -0.83897 | -2.10109 | -0.21746 |
| O | 0.63713  | -3.79672 | 0.0277   |
| C | -0.31127 | -1.77686 | -1.53041 |
| C | -1.24005 | -0.70002 | -2.12147 |
| C | 1.07819  | -1.22346 | -1.38644 |
| C | -2.62418 | -1.10895 | -2.59712 |
| C | -4.64986 | 0.31007  | -0.62048 |
| C | -4.06296 | -1.10713 | -0.3868  |
| C | -3.59169 | -1.82912 | -1.67755 |
| C | -2.98513 | -0.81458 | -3.8535  |
| C | -5.08676 | -2.00167 | 0.3318   |
| O | -3.09733 | 4.97824  | -0.87348 |
| O | 0.47366  | 1.2514   | 1.91668  |
| C | 2.22023  | -1.54377 | -2.04267 |
| O | 3.21665  | -0.71917 | -1.58777 |
| C | 2.62858  | 0.07152  | -0.64275 |
| N | 1.35006  | -0.18881 | -0.50213 |
| C | 3.3625   | 1.07658  | 0.09686  |
| C | 4.67628  | 1.38989  | 0.06642  |
| C | 5.71727  | 0.7144   | -0.82254 |
| C | 5.18576  | 2.51667  | 0.92935  |
| C | 5.94916  | 1.5027   | -2.11526 |
| O | 6.97952  | 0.62686  | -0.16205 |
| C | 7.03934  | -0.40258 | 0.80765  |
| H | -1.56568 | 4.26056  | 1.16955  |
| H | -5.09675 | 3.03223  | -0.00568 |
| H | -4.5197  | 2.97038  | -1.67985 |
| H | -2.77652 | 1.32519  | -1.01711 |
| H | -1.2412  | 2.90585  | 3.11628  |
| H | -2.49105 | 1.70603  | 3.46148  |
| H | -0.23674 | 0.8588   | 3.76743  |
| H | -1.48956 | -0.50638 | 1.35227  |
| H | -2.07415 | -0.70024 | 2.99043  |
| H | -0.04187 | -1.82183 | 3.6955   |
| H | 0.8175   | -1.36669 | 2.23589  |
| H | -1.699   | -3.06456 | 2.00903  |
| H | -0.30159 | -5.15749 | 2.24614  |

|   |          |          |          |
|---|----------|----------|----------|
| H | -0.36828 | -4.22428 | 3.75677  |
| H | 1.07971  | -4.17117 | 2.72904  |
| H | -0.29078 | -2.68251 | -2.14399 |
| H | -0.70732 | -0.25281 | -2.96748 |
| H | -1.30216 | 0.08404  | -1.35802 |
| H | -5.50385 | 0.47111  | 0.04995  |
| H | -5.03446 | 0.40372  | -1.64439 |
| H | -3.20079 | -1.00758 | 0.27672  |
| H | -3.14085 | -2.77984 | -1.3612  |
| H | -4.48025 | -2.09162 | -2.26739 |
| H | -3.97078 | -1.06541 | -4.23783 |
| H | -2.31193 | -0.3144  | -4.54582 |
| H | -5.36516 | -1.57589 | 1.30253  |
| H | -6.0046  | -2.11074 | -0.26082 |
| H | -4.68502 | -3.00689 | 0.50764  |
| H | 0.44324  | 0.77652  | 1.0615   |
| H | 2.4951   | -2.27475 | -2.78566 |
| H | 2.70765  | 1.6279   | 0.76677  |
| H | 5.3837   | -0.29653 | -1.08368 |
| H | 4.3715   | 2.99634  | 1.47876  |
| H | 5.93355  | 2.16228  | 1.64714  |
| H | 5.68874  | 3.27815  | 0.31983  |
| H | 6.72022  | 1.00511  | -2.71154 |
| H | 5.02656  | 1.55802  | -2.70091 |
| H | 6.28875  | 2.52036  | -1.89799 |
| H | 6.32026  | -0.24945 | 1.62671  |
| H | 6.84531  | -1.3895  | 0.35923  |
| H | 8.05194  | -0.392   | 1.21945  |

**Compound 1c:** Isomer 2S, 5R, 11S, 13S, 17S, 23R conformer 57

|   |          |         |          |
|---|----------|---------|----------|
| C | -0.22278 | 2.36953 | 1.80271  |
| C | 0.83157  | 2.92592 | 1.14991  |
| C | 0.65048  | 3.72055 | -0.05757 |
| C | -0.81563 | 3.99409 | -0.40238 |
| C | -1.64736 | 2.75494 | -0.08516 |
| O | -1.48462 | 2.38179 | 1.31924  |
| C | -0.09865 | 1.64495 | 3.11282  |
| C | 0.10372  | 0.10993 | 2.97263  |

|   |          |          |          |
|---|----------|----------|----------|
| C | -1.12306 | -0.62063 | 2.41289  |
| C | -1.00242 | -2.14629 | 2.52351  |
| C | -2.10076 | -2.94211 | 1.7614   |
| C | -1.74193 | -3.01653 | 0.28387  |
| C | -2.27582 | -4.35413 | 2.33079  |
| O | -1.93684 | -1.82557 | -0.33722 |
| O | -1.29973 | -3.99577 | -0.28031 |
| C | -1.46176 | -1.72882 | -1.71156 |
| C | -2.15834 | -0.52668 | -2.35714 |
| C | 0.02655  | -1.51911 | -1.69564 |
| C | -3.66085 | -0.37525 | -2.18393 |
| C | -3.15436 | 2.87731  | -0.31771 |
| C | -3.87533 | 1.50529  | -0.42999 |
| C | -4.09432 | 1.05223  | -1.91623 |
| C | -4.52643 | -1.38773 | -2.28261 |
| C | -5.21294 | 1.50204  | 0.32399  |
| O | 1.57805  | 4.16236  | -0.72835 |
| O | 1.27961  | -0.18606 | 2.22351  |
| C | 1.04003  | -2.37489 | -1.98234 |
| O | 2.22418  | -1.7071  | -1.80653 |
| C | 1.86839  | -0.45048 | -1.39647 |
| N | 0.57093  | -0.29643 | -1.31979 |
| C | 2.84123  | 0.59032  | -1.11919 |
| C | 4.15226  | 0.50021  | -0.81216 |
| C | 4.92279  | -0.80808 | -0.66772 |
| C | 4.93166  | 1.76555  | -0.55332 |
| C | 5.96643  | -0.9948  | -1.77076 |
| O | 5.62604  | -0.83516 | 0.57567  |
| C | 4.78892  | -1.09041 | 1.69368  |
| H | 1.82919  | 2.82971  | 1.5626   |
| H | -1.16838 | 4.8566   | 0.18166  |
| H | -0.89404 | 4.25071  | -1.46287 |
| H | -1.22998 | 1.91579  | -0.65795 |
| H | 0.7643   | 2.04685  | 3.65164  |
| H | -0.99649 | 1.83689  | 3.71235  |
| H | 0.31853  | -0.26698 | 3.98053  |
| H | -1.25835 | -0.33038 | 1.36692  |
| H | -2.02266 | -0.28329 | 2.94587  |
| H | -1.05764 | -2.43342 | 3.58242  |

|   |          |          |          |
|---|----------|----------|----------|
| H | -0.01219 | -2.46119 | 2.17221  |
| H | -3.04617 | -2.38981 | 1.84439  |
| H | -3.03423 | -4.91693 | 1.77764  |
| H | -2.58259 | -4.30104 | 3.38088  |
| H | -1.33884 | -4.91587 | 2.26941  |
| H | -1.70169 | -2.6688  | -2.21254 |
| H | -1.91566 | -0.55361 | -3.42959 |
| H | -1.66502 | 0.36967  | -1.97584 |
| H | -3.56379 | 3.46215  | 0.5154   |
| H | -3.32536 | 3.4715   | -1.22417 |
| H | -3.23469 | 0.76081  | 0.05787  |
| H | -5.15177 | 1.17927  | -2.17797 |
| H | -3.53206 | 1.7149   | -2.58911 |
| H | -5.59805 | -1.22867 | -2.19123 |
| H | -4.20683 | -2.41254 | -2.45686 |
| H | -5.06697 | 1.71224  | 1.38992  |
| H | -5.89688 | 2.2606   | -0.07869 |
| H | -5.70589 | 0.52677  | 0.23653  |
| H | 1.11941  | 0.08434  | 1.30191  |
| H | 1.10047  | -3.40733 | -2.28593 |
| H | 2.38637  | 1.57742  | -1.14664 |
| H | 4.22469  | -1.65277 | -0.69945 |
| H | 4.27744  | 2.64195  | -0.5402  |
| H | 5.46836  | 1.69591  | 0.39861  |
| H | 5.69378  | 1.92147  | -1.32882 |
| H | 6.4825   | -1.94902 | -1.62683 |
| H | 5.4885   | -0.99518 | -2.75585 |
| H | 6.71382  | -0.19605 | -1.74195 |
| H | 4.00479  | -0.33156 | 1.82123  |
| H | 4.30034  | -2.07371 | 1.61006  |
| H | 5.43587  | -1.08968 | 2.57502  |

**Compound 1c:** Isomer 2S, 5R, 11S, 13S, 17S, 23R conformer 58

|   |         |          |          |
|---|---------|----------|----------|
| C | 2.79859 | -2.23324 | 0.91023  |
| C | 3.14633 | -3.26152 | 0.09367  |
| C | 4.13078 | -3.09789 | -0.97071 |
| C | 4.74003 | -1.69588 | -1.04883 |
| C | 3.72344 | -0.64426 | -0.62027 |



|   |          |          |          |
|---|----------|----------|----------|
| O | 3.19997  | -0.95959 | 0.70265  |
| C | 1.98109  | -2.39599 | 2.16255  |
| C | 0.63595  | -1.62515 | 2.20157  |
| C | 0.77679  | -0.10744 | 2.36105  |
| C | -0.53417 | 0.58535  | 2.75638  |
| C | -0.44084 | 2.14219  | 2.77002  |
| C | -0.99015 | 2.74242  | 1.47893  |
| C | -1.15183 | 2.76415  | 3.97726  |
| O | -0.39399 | 2.20013  | 0.38692  |
| O | -1.85564 | 3.58837  | 1.40988  |
| C | -0.93599 | 2.56808  | -0.90953 |
| C | 0.11223  | 2.13119  | -1.94308 |
| C | -2.26209 | 1.90058  | -1.13474 |
| C | 1.38381  | 2.97309  | -1.999   |
| C | 4.26439  | 0.78089  | -0.53723 |
| C | 3.17052  | 1.87248  | -0.4916  |
| C | 2.6997   | 2.22589  | -1.92866 |
| C | 1.33908  | 4.29954  | -2.16546 |
| C | 3.66423  | 3.12081  | 0.25018  |
| O | 4.49696  | -4.00486 | -1.70729 |
| O | -0.10997 | -1.84153 | 1.01001  |
| C | -3.43911 | 2.44927  | -1.53584 |
| O | -4.35297 | 1.44297  | -1.67363 |
| C | -3.67714 | 0.3022   | -1.32285 |
| N | -2.42991 | 0.52998  | -1.00941 |
| C | -4.44725 | -0.93105 | -1.38875 |
| C | -4.18004 | -2.11315 | -0.79436 |
| C | -3.01097 | -2.31232 | 0.16052  |
| C | -5.08498 | -3.29768 | -1.0174  |
| C | -3.4886  | -2.58487 | 1.58864  |
| O | -2.19658 | -3.4425  | -0.20941 |
| C | -1.52088 | -3.26842 | -1.45377 |
| H | 2.76655  | -4.25895 | 0.28395  |
| H | 5.62153  | -1.66072 | -0.39177 |
| H | 5.08327  | -1.5104  | -2.07111 |
| H | 2.86111  | -0.69412 | -1.30246 |
| H | 1.7803   | -3.46558 | 2.2896   |
| H | 2.59085  | -2.08445 | 3.02264  |
| H | 0.08431  | -2.01513 | 3.07425  |

|   |          |          |          |
|---|----------|----------|----------|
| H | 1.13476  | 0.29583  | 1.41199  |
| H | 1.54691  | 0.10846  | 3.11421  |
| H | -0.82731 | 0.25368  | 3.76184  |
| H | -1.32866 | 0.26327  | 2.07523  |
| H | 0.62354  | 2.41781  | 2.80872  |
| H | -1.08585 | 3.8555   | 3.96063  |
| H | -0.70037 | 2.40007  | 4.90656  |
| H | -2.21433 | 2.49907  | 3.98344  |
| H | -1.07946 | 3.65144  | -0.9261  |
| H | -0.37038 | 2.1549   | -2.92875 |
| H | 0.34558  | 1.07983  | -1.74421 |
| H | 4.89802  | 0.83666  | 0.35693  |
| H | 4.92441  | 0.95814  | -1.39743 |
| H | 2.31277  | 1.47349  | 0.0627   |
| H | 3.4894   | 2.81738  | -2.41122 |
| H | 2.60639  | 1.29927  | -2.51375 |
| H | 2.24552  | 4.8932   | -2.25022 |
| H | 0.40191  | 4.84822  | -2.23023 |
| H | 3.91618  | 2.88379  | 1.29049  |
| H | 4.56451  | 3.5333   | -0.22516 |
| H | 2.89909  | 3.90355  | 0.25492  |
| H | -0.52251 | -2.72292 | 0.99718  |
| H | -3.7819  | 3.45096  | -1.73984 |
| H | -5.353   | -0.83787 | -1.98457 |
| H | -2.38143 | -1.4217  | 0.15372  |
| H | -5.61803 | -3.57122 | -0.09738 |
| H | -5.83031 | -3.09781 | -1.79262 |
| H | -4.4995  | -4.17754 | -1.30835 |
| H | -2.62645 | -2.62667 | 2.26174  |
| H | -4.15178 | -1.78394 | 1.93146  |
| H | -4.02173 | -3.53828 | 1.65606  |
| H | -2.22845 | -3.18632 | -2.29017 |
| H | -0.88394 | -2.37578 | -1.43558 |
| H | -0.90173 | -4.15777 | -1.59793 |

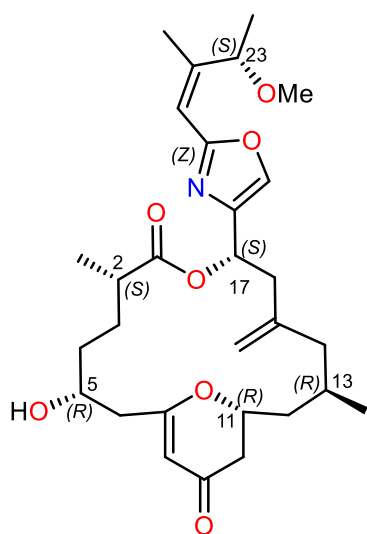

**Table 6.** Calculated DFT energies of the **1d**-(2S5R11R13R17S23S) diastereoisomer.

| Conformers <b>1d</b> | OPLS2008 Force Field | B3LYP/6-31+G(d,p) | $\Delta$ (DFT Energy) | % Population |
|----------------------|----------------------|-------------------|-----------------------|--------------|
| <b>1d4</b>           | 0.675979924          | -1710.462343      | 0                     | 60.29        |
| <b>1d25</b>          | 2.917853728          | -1710.461345      | 0.62625437            | 20.92        |
| <b>1d15</b>          | 2.413838432          | -1710.460657      | 1.05798083            | 10.09        |
| <b>1d1</b>           | 0                    | -1710.459641      | 1.69553037            | 3.44         |
| <b>1d22</b>          | 2.878847992          | -1710.458274      | 2.55333571            | 0.81         |
| <b>1d28</b>          | 3.050454111          | -1710.458268      | 2.55710077            | 0.80         |
| <b>1d45</b>          | 3.916849904          | -1710.457978      | 2.73907849            | 0.59         |
| <b>1d20</b>          | 2.781477055          | -1710.457663      | 2.93674395            | 0.42         |
| <b>1d6</b>           | 1.353608987          | -1710.457538      | 3.01518262            | 0.37         |
| <b>1d2</b>           | 0.363957935          | -1710.457466      | 3.0603633             | 0.34         |
| <b>1d17</b>          | 2.638432122          | -1710.457395      | 3.10491647            | 0.32         |
| <b>1d3</b>           | 0.483843212          | -1710.457216      | 3.21724065            | 0.26         |
| <b>1d33</b>          | 3.420458891          | -1710.457205      | 3.22414325            | 0.26         |
| <b>1d39</b>          | 3.690774379          | -1710.456651      | 3.57178345            | 0.14         |
| <b>1d55</b>          | 4.390869981          | -1710.456577      | 3.61821915            | 0.13         |
| <b>1d57</b>          | 4.408819312          | -1710.456514      | 3.65775224            | 0.12         |
| <b>1d11</b>          | 1.783699809          | -1710.456114      | 3.908756              | 0.08         |
| 1d49                 | 4.078967495          | -1710.456082      | 3.9288363             | 0.08         |
| 1d16                 | 2.592638623          | -1710.455898      | 4.04429803            | 0.06         |

19 conformers counting for the 99.53% of the DFT conformational population

DFT COORDINATES FOR CONFORMATIONAL SEARCH OF 1d  
(2S\*, 5R\*, 11R\*, 13R\*, 17S\*, 23S\*)

**Compound 1c:** Isomer 2S, 5R, 11R, 13R, 17S, 23S conformer 1

|   |          |          |          |
|---|----------|----------|----------|
| C | -2.71147 | 1.51437  | 1.11078  |
| C | -3.87926 | 1.81271  | 1.74062  |
| C | -5.11957 | 2.03067  | 0.99687  |
| C | -4.96889 | 1.91817  | -0.52103 |
| C | -3.86493 | 0.93351  | -0.89822 |
| O | -2.62631 | 1.27878  | -0.21907 |
| C | -1.40309 | 1.27155  | 1.80327  |
| C | -1.27705 | -0.23433 | 2.15522  |
| C | 0.1226   | -0.60754 | 2.64153  |
| C | 0.2402   | -2.06575 | 3.12184  |
| C | -0.22323 | -3.17713 | 2.13989  |
| C | 0.66763  | -3.23929 | 0.90815  |
| C | -0.24422 | -4.54213 | 2.83963  |
| O | 0.36161  | -2.26218 | 0.01409  |
| O | 1.55844  | -4.04449 | 0.7305   |
| C | 1.2047   | -2.1897  | -1.17644 |
| C | 0.43197  | -1.37922 | -2.22272 |
| C | 2.53001  | -1.56851 | -0.84402 |
| C | -0.89199 | -1.99883 | -2.65611 |
| C | -3.58582 | 0.87317  | -2.39831 |
| C | -2.29788 | 0.14968  | -2.84951 |
| C | -2.16402 | -1.27695 | -2.25857 |
| C | -0.91962 | -3.13107 | -3.36697 |
| C | -2.23933 | 0.14124  | -4.38448 |
| O | -6.18391 | 2.32261  | 1.52393  |
| O | -2.20007 | -0.59314 | 3.17997  |
| C | 3.72069  | -2.18455 | -0.62017 |
| O | 4.65744  | -1.22484 | -0.37365 |
| C | 3.97807  | -0.03484 | -0.45063 |
| N | 2.7106   | -0.19406 | -0.73369 |
| C | 4.781    | 1.15239  | -0.23629 |
| C | 4.36052  | 2.43009  | -0.12158 |
| C | 2.89781  | 2.84939  | -0.20403 |
| C | 5.36366  | 3.54039  | 0.05661  |
| C | 2.51458  | 3.27479  | -1.62377 |

|   |          |          |          |
|---|----------|----------|----------|
| O | 2.63045  | 3.96259  | 0.6508   |
| C | 2.52119  | 3.61313  | 2.01688  |
| H | -3.88785 | 1.98083  | 2.81235  |
| H | -5.92679 | 1.6174   | -0.9563  |
| H | -4.72657 | 2.91591  | -0.91546 |
| H | -4.13753 | -0.06391 | -0.52254 |
| H | -1.33681 | 1.85845  | 2.72478  |
| H | -0.58568 | 1.56277  | 1.13405  |
| H | -1.48768 | -0.80339 | 1.23832  |
| H | 0.39337  | 0.04806  | 3.48056  |
| H | 0.82919  | -0.4038  | 1.82977  |
| H | -0.36657 | -2.17667 | 4.0262   |
| H | 1.2811   | -2.26401 | 3.4103   |
| H | -1.23671 | -2.93111 | 1.80468  |
| H | -0.58531 | -5.33146 | 2.16213  |
| H | -0.91996 | -4.51134 | 3.70063  |
| H | 0.75553  | -4.81731 | 3.18904  |
| H | 1.36612  | -3.21413 | -1.51906 |
| H | 1.09572  | -1.27224 | -3.08934 |
| H | 0.2882   | -0.37142 | -1.82417 |
| H | -3.5523  | 1.89927  | -2.78874 |
| H | -4.45973 | 0.3954   | -2.86416 |
| H | -1.45474 | 0.7456   | -2.47957 |
| H | -2.18847 | -1.20523 | -1.16318 |
| H | -3.03142 | -1.87831 | -2.56384 |
| H | -1.85515 | -3.58845 | -3.67894 |
| H | -0.00982 | -3.65062 | -3.66143 |
| H | -2.31714 | 1.15812  | -4.787   |
| H | -3.06388 | -0.44883 | -4.8059  |
| H | -1.30469 | -0.29632 | -4.74784 |
| H | -3.09162 | -0.36524 | 2.867    |
| H | 4.0412   | -3.21258 | -0.57941 |
| H | 5.84617  | 0.94275  | -0.1749  |
| H | 2.26173  | 2.00352  | 0.0856   |
| H | 6.38879  | 3.15936  | 0.03774  |
| H | 5.25977  | 4.29099  | -0.7374  |
| H | 5.20521  | 4.07509  | 0.99935  |
| H | 1.47122  | 3.60546  | -1.63426 |
| H | 2.6273   | 2.43179  | -2.31128 |

|   |         |         |          |
|---|---------|---------|----------|
| H | 3.13959 | 4.10465 | -1.96996 |
| H | 1.71333 | 2.88301 | 2.18315  |
| H | 3.45372 | 3.18785 | 2.41881  |
| H | 2.28786 | 4.53121 | 2.56291  |

**Compound 1c:** Isomer 2S, 5R, 11R, 13R, 17S, 23S conformer 2

|   |          |          |          |
|---|----------|----------|----------|
| C | -2.77561 | 1.42462  | 1.15819  |
| C | -3.93767 | 1.77674  | 1.75988  |
| C | -5.15212 | 2.03561  | 0.99411  |
| C | -4.98024 | 1.9087   | -0.52047 |
| C | -3.89594 | 0.89611  | -0.88254 |
| O | -2.66285 | 1.19852  | -0.17467 |
| C | -1.48065 | 1.16043  | 1.87004  |
| C | -1.29463 | -0.35072 | 2.15224  |
| C | 0.12504  | -0.6861  | 2.63014  |
| C | 0.2963   | -2.14715 | 3.08535  |
| C | -0.12728 | -3.25797 | 2.08589  |
| C | 0.76109  | -3.26425 | 0.85079  |
| C | -0.09337 | -4.63454 | 2.76168  |
| O | 0.42594  | -2.27146 | -0.01337 |
| O | 1.67013  | -4.04265 | 0.64803  |
| C | 1.25371  | -2.15029 | -1.21129 |
| C | 0.44584  | -1.33826 | -2.22819 |
| C | 2.5656   | -1.50226 | -0.87742 |
| C | -0.86799 | -1.98371 | -2.65639 |
| C | -3.59481 | 0.85425  | -2.38077 |
| C | -2.29713 | 0.14872  | -2.8302  |
| C | -2.15167 | -1.28337 | -2.25745 |
| C | -0.87667 | -3.11682 | -3.36628 |
| C | -2.22509 | 0.16114  | -4.36468 |
| O | -6.2153  | 2.37482  | 1.49714  |
| O | -2.29369 | -0.83059 | 3.05155  |
| C | 3.77356  | -2.0923  | -0.6772  |
| O | 4.68762  | -1.1146  | -0.4165  |
| C | 3.97741  | 0.05902  | -0.46127 |
| N | 2.712    | -0.12646 | -0.7373  |
| C | 4.752    | 1.26111  | -0.22632 |
| C | 4.30209  | 2.52652  | -0.08896 |

|   |          |          |          |
|---|----------|----------|----------|
| C | 2.83028  | 2.91388  | -0.16546 |
| C | 5.27946  | 3.65632  | 0.10875  |
| C | 2.43887  | 3.35796  | -1.5772  |
| O | 2.5374   | 4.00432  | 0.71056  |
| C | 2.43074  | 3.62509  | 2.06826  |
| H | -3.97416 | 1.90869  | 2.83507  |
| H | -5.93911 | 1.62943  | -0.96808 |
| H | -4.70956 | 2.89864  | -0.91655 |
| H | -4.20386 | -0.09748 | -0.52587 |
| H | -1.44936 | 1.7155   | 2.81586  |
| H | -0.65251 | 1.5154   | 1.24448  |
| H | -1.48429 | -0.89103 | 1.22104  |
| H | 0.38549  | -0.03405 | 3.47908  |
| H | 0.82748  | -0.44231 | 1.8255   |
| H | -0.30588 | -2.30222 | 3.98757  |
| H | 1.3427   | -2.31205 | 3.37441  |
| H | -1.15036 | -3.04448 | 1.75844  |
| H | -0.40166 | -5.42388 | 2.06902  |
| H | -0.7717  | -4.64785 | 3.62118  |
| H | 0.91629  | -4.87611 | 3.10774  |
| H | 1.43852  | -3.16245 | -1.57754 |
| H | 1.09374  | -1.19305 | -3.10135 |
| H | 0.28071  | -0.34421 | -1.8044  |
| H | -3.56291 | 1.88519  | -2.75862 |
| H | -4.46003 | 0.37785  | -2.86402 |
| H | -1.4638  | 0.74886  | -2.44508 |
| H | -2.18712 | -1.2243  | -1.16178 |
| H | -3.0091  | -1.89151 | -2.5767  |
| H | -1.80474 | -3.59039 | -3.67625 |
| H | 0.04126  | -3.62106 | -3.66231 |
| H | -2.31123 | 1.18227  | -4.75459 |
| H | -3.03934 | -0.43255 | -4.80073 |
| H | -1.28258 | -0.26112 | -4.7262  |
| H | -2.15261 | -0.39971 | 3.91082  |
| H | 4.12072  | -3.11238 | -0.66297 |
| H | 5.82194  | 1.07562  | -0.17021 |
| H | 2.21291  | 2.04876  | 0.10715  |
| H | 6.31314  | 3.29965  | 0.08297  |
| H | 5.15776  | 4.41824  | -0.67181 |

|   |         |         |          |
|---|---------|---------|----------|
| H | 5.1094  | 4.17069 | 1.06079  |
| H | 1.3879  | 3.66354 | -1.58311 |
| H | 2.57265 | 2.53172 | -2.28109 |
| H | 3.04436 | 4.20914 | -1.90586 |
| H | 1.63609 | 2.87641 | 2.21647  |
| H | 3.36986 | 3.20897 | 2.46472  |
| H | 2.1783  | 4.52705 | 2.63244  |

**Compound 1c:** Isomer 2S, 5R, 11R, 13R, 17S, 23S conformer 3

|   |          |          |          |
|---|----------|----------|----------|
| C | 2.92859  | -2.11991 | -0.24281 |
| C | 4.04635  | -2.58196 | 0.37437  |
| C | 5.34307  | -1.93861 | 0.20345  |
| C | 5.33109  | -0.76452 | -0.77584 |
| C | 3.99001  | -0.03404 | -0.75608 |
| O | 2.89042  | -0.96575 | -0.95233 |
| C | 1.58976  | -2.80096 | -0.17745 |
| C | 0.82328  | -2.53187 | 1.14632  |
| C | 0.51674  | -1.04217 | 1.36047  |
| C | -0.10525 | -0.74847 | 2.73487  |
| C | 0.03128  | 0.7141   | 3.24003  |
| C | -0.82771 | 1.70078  | 2.45636  |
| C | -0.2989  | 0.81673  | 4.73418  |
| O | -0.39512 | 1.83609  | 1.17499  |
| O | -1.77478 | 2.31304  | 2.9008   |
| C | -1.14398 | 2.74279  | 0.3216   |
| C | -0.29182 | 2.96405  | -0.93959 |
| C | -2.48697 | 2.16774  | -0.01785 |
| C | 1.08471  | 3.55568  | -0.67548 |
| C | 3.88316  | 1.03983  | -1.8347  |
| C | 2.56543  | 1.83871  | -1.9238  |
| C | 2.27064  | 2.61351  | -0.61178 |
| C | 1.23051  | 4.87445  | -0.5055  |
| C | 2.63276  | 2.7739   | -3.14081 |
| O | 6.37458  | -2.3246  | 0.73803  |
| O | -0.32533 | -3.36228 | 1.23202  |
| C | -3.72762 | 2.69135  | 0.16237  |
| O | -4.63993 | 1.8093   | -0.34295 |
| C | -3.89533 | 0.75543  | -0.80368 |



|   |          |          |          |
|---|----------|----------|----------|
| N | -2.61031 | 0.93899  | -0.64807 |
| C | -4.64475 | -0.3604  | -1.3529  |
| C | -4.19955 | -1.61464 | -1.57946 |
| C | -2.77754 | -2.05361 | -1.26273 |
| C | -5.11686 | -2.65583 | -2.16834 |
| C | -1.98064 | -2.37685 | -2.52668 |
| O | -2.75618 | -3.24254 | -0.44911 |
| C | -3.408   | -3.09594 | 0.81145  |
| H | 4.00199  | -3.49719 | 0.955    |
| H | 6.14708  | -0.07982 | -0.52585 |
| H | 5.52803  | -1.15797 | -1.78399 |
| H | 3.84066  | 0.39942  | 0.24372  |
| H | 1.71882  | -3.88434 | -0.26357 |
| H | 0.98394  | -2.46035 | -1.02594 |
| H | 1.46457  | -2.87067 | 1.97015  |
| H | -0.12697 | -0.67229 | 0.55366  |
| H | 1.45881  | -0.48657 | 1.27116  |
| H | 0.39317  | -1.37819 | 3.48416  |
| H | -1.16017 | -1.04788 | 2.75138  |
| H | 1.07547  | 1.01859  | 3.07934  |
| H | -0.19504 | 1.84383  | 5.09582  |
| H | 0.37356  | 0.17463  | 5.31278  |
| H | -1.32945 | 0.50313  | 4.9279   |
| H | -1.27855 | 3.68329  | 0.86351  |
| H | -0.86652 | 3.63703  | -1.58679 |
| H | -0.22059 | 2.00662  | -1.46547 |
| H | 4.06521  | 0.55639  | -2.80406 |
| H | 4.71712  | 1.7392   | -1.67765 |
| H | 1.75546  | 1.1166   | -2.08878 |
| H | 2.09558  | 1.88749  | 0.19255  |
| H | 3.16306  | 3.19224  | -0.33596 |
| H | 2.19962  | 5.32249  | -0.30069 |
| H | 0.38597  | 5.55872  | -0.56048 |
| H | 2.84636  | 2.21015  | -4.05652 |
| H | 3.42453  | 3.52454  | -3.01749 |
| H | 1.6929   | 3.31425  | -3.28861 |
| H | -0.90353 | -3.23165 | 0.45576  |
| H | -4.11505 | 3.59224  | 0.61013  |
| H | -5.68309 | -0.12164 | -1.5718  |

|   |          |          |          |
|---|----------|----------|----------|
| H | -2.27273 | -1.25066 | -0.71836 |
| H | -6.15052 | -2.30147 | -2.21688 |
| H | -4.80456 | -2.92164 | -3.18715 |
| H | -5.08629 | -3.58247 | -1.585   |
| H | -0.96503 | -2.68708 | -2.26123 |
| H | -1.91593 | -1.49207 | -3.16746 |
| H | -2.44373 | -3.19189 | -3.09123 |
| H | -3.18325 | -3.99922 | 1.38172  |
| H | -3.02813 | -2.22444 | 1.36106  |
| H | -4.49478 | -2.99573 | 0.69614  |

**Compound 1c:** Isomer 2S, 5R, 11R, 13R, 17S, 23S conformer 4

|   |          |          |          |
|---|----------|----------|----------|
| C | 5.12942  | -0.56206 | -0.50222 |
| C | 5.87754  | -0.69138 | 0.62025  |
| C | 6.13656  | 0.43786  | 1.50997  |
| C | 5.53812  | 1.76063  | 1.0314   |
| C | 4.23314  | 1.53783  | 0.27391  |
| O | 4.43104  | 0.56947  | -0.80368 |
| C | 4.9915   | -1.61406 | -1.56735 |
| C | 3.54152  | -2.07127 | -1.86214 |
| C | 2.8074   | -2.5997  | -0.61929 |
| C | 1.47092  | -3.26557 | -0.97667 |
| C | 0.55606  | -3.54307 | 0.23621  |
| C | 0.22322  | -2.24143 | 0.95275  |
| C | -0.72624 | -4.28512 | -0.18164 |
| O | -0.3953  | -1.37297 | 0.11833  |
| O | 0.49917  | -1.98592 | 2.10778  |
| C | -0.62079 | -0.02016 | 0.62178  |
| C | -0.48965 | 0.90697  | -0.59754 |
| C | -1.94661 | 0.05158  | 1.31635  |
| C | -0.22253 | 2.3494   | -0.2103  |
| C | 3.67206  | 2.8076   | -0.36221 |
| C | 2.2361   | 2.71692  | -0.92315 |
| C | 1.18915  | 2.6957   | 0.22278  |
| C | -1.19526 | 3.26663  | -0.23941 |
| C | 1.9727   | 3.87633  | -1.89395 |
| O | 6.82445  | 0.36454  | 2.51828  |
| O | 2.79948  | -1.04344 | -2.51515 |

|   |          |          |          |
|---|----------|----------|----------|
| C | -2.20468 | -0.11253 | 2.64108  |
| O | -3.55043 | 0.00137  | 2.8297   |
| C | -4.0668  | 0.22932  | 1.5781   |
| N | -3.14523 | 0.27367  | 0.65134  |
| C | -5.50712 | 0.38284  | 1.52141  |
| C | -6.29254 | 0.46697  | 0.42663  |
| C | -5.76285 | 0.42789  | -1.0021  |
| C | -7.78148 | 0.64328  | 0.579    |
| C | -5.60969 | 1.83642  | -1.58192 |
| O | -6.65923 | -0.27818 | -1.8628  |
| C | -6.58331 | -1.68406 | -1.72215 |
| H | 6.37796  | -1.62969 | 0.831    |
| H | 5.37306  | 2.41208  | 1.89463  |
| H | 6.27169  | 2.25646  | 0.37891  |
| H | 3.50385  | 1.07799  | 0.9562   |
| H | 5.60176  | -2.47677 | -1.28219 |
| H | 5.40349  | -1.21441 | -2.50392 |
| H | 3.61113  | -2.88257 | -2.59833 |
| H | 2.64474  | -1.75946 | 0.0699   |
| H | 3.45174  | -3.31087 | -0.08344 |
| H | 1.66625  | -4.21961 | -1.48547 |
| H | 0.93546  | -2.6281  | -1.68738 |
| H | 1.09659  | -4.14563 | 0.97509  |
| H | -1.36823 | -4.48913 | 0.68232  |
| H | -0.47082 | -5.24397 | -0.64617 |
| H | -1.30028 | -3.69562 | -0.90322 |
| H | 0.16458  | 0.17551  | 1.35549  |
| H | -1.40115 | 0.83078  | -1.19584 |
| H | 0.33424  | 0.51133  | -1.20371 |
| H | 4.36347  | 3.10377  | -1.16182 |
| H | 3.71127  | 3.60586  | 0.39203  |
| H | 2.15091  | 1.78083  | -1.49159 |
| H | 1.51484  | 1.97636  | 0.98837  |
| H | 1.19168  | 3.68047  | 0.70863  |
| H | -1.0165  | 4.2988   | 0.053    |
| H | -2.20619 | 3.01302  | -0.54676 |
| H | 2.65989  | 3.84013  | -2.74698 |
| H | 2.11151  | 4.8436   | -1.39291 |
| H | 0.94907  | 3.845    | -2.27906 |

|   |          |          |          |
|---|----------|----------|----------|
| H | 2.99819  | -0.21867 | -2.0405  |
| H | -1.59716 | -0.3177  | 3.50758  |
| H | -5.97027 | 0.42929  | 2.50419  |
| H | -4.78137 | -0.06091 | -1.01304 |
| H | -8.07079 | 0.71751  | 1.63129  |
| H | -8.12302 | 1.54962  | 0.06259  |
| H | -8.32822 | -0.18864 | 0.12187  |
| H | -5.24865 | 1.76871  | -2.61284 |
| H | -4.89188 | 2.41269  | -0.99051 |
| H | -6.56814 | 2.36597  | -1.58924 |
| H | -7.28153 | -2.11423 | -2.44538 |
| H | -5.56971 | -2.05651 | -1.93694 |
| H | -6.86562 | -2.02039 | -0.7124  |

**Compound 1c:** Isomer 2S, 5R, 11R, 13R, 17S, 23S conformer 6

|   |          |          |          |
|---|----------|----------|----------|
| C | -2.76752 | 1.24087  | 1.345    |
| C | -3.97585 | 1.41785  | 1.94325  |
| C | -5.16213 | 1.80475  | 1.18064  |
| C | -4.90834 | 2.01275  | -0.31314 |
| C | -3.77723 | 1.11919  | -0.81665 |
| O | -2.58951 | 1.29493  | 0.00415  |
| C | -1.51294 | 0.82945  | 2.05682  |
| C | -1.42198 | -0.71952 | 2.08329  |
| C | -0.06243 | -1.21878 | 2.5706   |
| C | 0.00962  | -2.7489  | 2.7273   |
| C | -0.40095 | -3.60775 | 1.49928  |
| C | 0.57198  | -3.42217 | 0.34465  |
| C | -0.48439 | -5.09121 | 1.8805   |
| O | 0.34443  | -2.26448 | -0.32892 |
| O | 1.46396  | -4.19348 | 0.0547   |
| C | 1.28153  | -1.95259 | -1.40856 |
| C | 0.59956  | -0.91784 | -2.30906 |
| C | 2.58018  | -1.45169 | -0.84419 |
| C | -0.68725 | -1.40049 | -2.96859 |
| C | -3.3959  | 1.38289  | -2.27196 |
| C | -2.07917 | 0.75838  | -2.78368 |
| C | -1.9859  | -0.76486 | -2.51328 |
| C | -0.66091 | -2.34266 | -3.91702 |

|   |          |          |          |
|---|----------|----------|----------|
| C | -1.91595 | 1.08617  | -4.27537 |
| O | -6.26035 | 1.99344  | 1.68472  |
| O | -2.4171  | -1.26965 | 2.94203  |
| C | 3.70628  | -2.15824 | -0.55935 |
| O | 4.63883  | -1.293   | -0.06813 |
| C | 4.02436  | -0.06595 | -0.06911 |
| N | 2.79919  | -0.11525 | -0.5267  |
| C | 4.83543  | 1.0333   | 0.41134  |
| C | 4.47281  | 2.3217   | 0.58623  |
| C | 3.08788  | 2.84814  | 0.25423  |
| C | 5.47286  | 3.32614  | 1.09311  |
| C | 3.00182  | 3.2659   | -1.22386 |
| O | 2.83421  | 3.95257  | 1.12756  |
| C | 1.46752  | 4.26513  | 1.28684  |
| H | -4.05958 | 1.35271  | 3.02293  |
| H | -5.83333 | 1.82046  | -0.86533 |
| H | -4.64471 | 3.06885  | -0.47097 |
| H | -4.07177 | 0.06744  | -0.68445 |
| H | -1.50834 | 1.20311  | 3.08546  |
| H | -0.64709 | 1.23824  | 1.52371  |
| H | -1.57148 | -1.07308 | 1.0532   |
| H | 0.1528   | -0.76638 | 3.54802  |
| H | 0.70113  | -0.85917 | 1.87228  |
| H | -0.65553 | -3.04048 | 3.54635  |
| H | 1.02747  | -3.03025 | 3.02839  |
| H | -1.38669 | -3.26811 | 1.16304  |
| H | -0.79148 | -5.70495 | 1.02761  |
| H | -1.2134  | -5.23033 | 2.68561  |
| H | 0.48748  | -5.46162 | 2.22025  |
| H | 1.46109  | -2.88237 | -1.95237 |
| H | 1.33183  | -0.6391  | -3.07649 |
| H | 0.428    | -0.01695 | -1.71415 |
| H | -3.33873 | 2.46903  | -2.42531 |
| H | -4.2353  | 1.02979  | -2.88818 |
| H | -1.26369 | 1.24604  | -2.23551 |
| H | -2.0899  | -0.93398 | -1.43345 |
| H | -2.82804 | -1.27228 | -3.00372 |
| H | -1.57002 | -2.70188 | -4.39262 |
| H | 0.26895  | -2.79809 | -4.25217 |

|   |          |          |          |
|---|----------|----------|----------|
| H | -1.96726 | 2.16757  | -4.44906 |
| H | -2.70964 | 0.61476  | -4.86986 |
| H | -0.95825 | 0.72674  | -4.66358 |
| H | -3.28338 | -0.96515 | 2.62353  |
| H | 3.97707  | -3.19929 | -0.61961 |
| H | 5.85503  | 0.74146  | 0.64931  |
| H | 2.34712  | 2.05845  | 0.43629  |
| H | 6.45546  | 2.86958  | 1.24315  |
| H | 5.58018  | 4.16311  | 0.39098  |
| H | 5.13143  | 3.76327  | 2.03708  |
| H | 2.01436  | 3.68036  | -1.45422 |
| H | 3.16043  | 2.39696  | -1.8684  |
| H | 3.75497  | 4.0267   | -1.45485 |
| H | 0.99786  | 4.61123  | 0.35416  |
| H | 0.89544  | 3.40085  | 1.6619   |
| H | 1.41151  | 5.07128  | 2.02353  |

**Compound 1c:** Isomer 2S, 5R, 11R, 13R, 17S, 23S conformer 11

|   |          |          |          |
|---|----------|----------|----------|
| C | -1.8569  | 1.27538  | 1.61962  |
| C | -2.51787 | 2.27858  | 2.25274  |
| C | -3.49415 | 3.11173  | 1.54808  |
| C | -3.66383 | 2.76289  | 0.0652   |
| C | -3.47954 | 1.26309  | -0.13941 |
| O | -2.17879 | 0.85834  | 0.37185  |
| C | -0.72142 | 0.4702   | 2.18295  |
| C | -1.09655 | -1.02045 | 2.34568  |
| C | 0.12752  | -1.89685 | 2.60697  |
| C | -0.15958 | -3.4077  | 2.58152  |
| C | -0.77456 | -3.98145 | 1.27453  |
| C | 0.09934  | -3.67711 | 0.06358  |
| C | -0.99416 | -5.49454 | 1.39952  |
| O | -0.15351 | -2.43997 | -0.42899 |
| O | 0.92556  | -4.43015 | -0.41245 |
| C | 0.64185  | -1.99372 | -1.57453 |
| C | -0.11509 | -0.82436 | -2.20079 |
| C | 2.02424  | -1.5986  | -1.13245 |
| C | -1.42627 | -1.12219 | -2.90012 |
| C | -3.58249 | 0.69903  | -1.55714 |

|   |          |          |          |
|---|----------|----------|----------|
| C | -2.54405 | 1.21352  | -2.58306 |
| C | -2.09407 | 0.07931  | -3.54546 |
| C | -1.97084 | -2.34057 | -2.99359 |
| C | -3.07656 | 2.39673  | -3.40763 |
| O | -4.08866 | 4.04561  | 2.0677   |
| O | -1.99627 | -1.21243 | 3.43881  |
| C | 3.12322  | -2.38716 | -0.98545 |
| O | 4.15891  | -1.60103 | -0.57559 |
| C | 3.63643  | -0.33529 | -0.48763 |
| N | 2.36902  | -0.28995 | -0.80995 |
| C | 4.57658  | 0.69331  | -0.08965 |
| C | 4.35052  | 2.01416  | 0.0753   |
| C | 2.99981  | 2.67934  | -0.16385 |
| C | 5.48535  | 2.9298   | 0.4548   |
| C | 2.87905  | 3.18099  | -1.6061  |
| O | 2.82227  | 3.81313  | 0.68531  |
| C | 2.44559  | 3.47896  | 2.00697  |
| H | -2.25491 | 2.54747  | 3.2698   |
| H | -4.65282 | 3.08965  | -0.26973 |
| H | -2.91272 | 3.32663  | -0.50473 |
| H | -4.22149 | 0.74533  | 0.48898  |
| H | -0.40692 | 0.8824   | 3.14702  |
| H | 0.12162  | 0.54385  | 1.48291  |
| H | -1.56659 | -1.33454 | 1.40645  |
| H | 0.53389  | -1.63618 | 3.59321  |
| H | 0.89606  | -1.64593 | 1.86823  |
| H | -0.85422 | -3.64973 | 3.39365  |
| H | 0.77362  | -3.94766 | 2.7897   |
| H | -1.73905 | -3.48972 | 1.10644  |
| H | -1.48665 | -5.90156 | 0.51017  |
| H | -1.6231  | -5.71294 | 2.26903  |
| H | -0.03985 | -6.01609 | 1.51813  |
| H | 0.71715  | -2.83957 | -2.26218 |
| H | 0.56164  | -0.34233 | -2.92047 |
| H | -0.27532 | -0.07501 | -1.41767 |
| H | -4.60154 | 0.88889  | -1.92077 |
| H | -3.48553 | -0.38834 | -1.45864 |
| H | -1.65996 | 1.55638  | -2.0311  |
| H | -2.96764 | -0.26175 | -4.1166  |

|   |          |          |          |
|---|----------|----------|----------|
| H | -1.40035 | 0.52266  | -4.27635 |
| H | -2.90185 | -2.49792 | -3.53268 |
| H | -1.52276 | -3.22398 | -2.5503  |
| H | -3.40767 | 3.22425  | -2.77164 |
| H | -3.93369 | 2.08943  | -4.02093 |
| H | -2.30665 | 2.78552  | -4.08455 |
| H | -2.7836  | -0.66849 | 3.27591  |
| H | 3.31341  | -3.44098 | -1.10227 |
| H | 5.58279  | 0.31126  | 0.06451  |
| H | 2.19829  | 1.95268  | 0.01755  |
| H | 6.43419  | 2.38839  | 0.50919  |
| H | 5.59095  | 3.74339  | -0.27395 |
| H | 5.30328  | 3.41327  | 1.42096  |
| H | 1.91723  | 3.68718  | -1.7351  |
| H | 2.93604  | 2.34095  | -2.30413 |
| H | 3.67519  | 3.89489  | -1.84217 |
| H | 3.19695  | 2.85268  | 2.51259  |
| H | 2.34209  | 4.41872  | 2.55597  |
| H | 1.48203  | 2.94618  | 2.02853  |

**Compound 1c:** Isomer 2S, 5R, 11R, 13R, 17S, 23S conformer 15

|   |          |          |          |
|---|----------|----------|----------|
| C | -5.36749 | 0.3516   | 0.38565  |
| C | -5.74278 | 0.34868  | 1.68783  |
| C | -5.66504 | -0.85561 | 2.51097  |
| C | -5.18099 | -2.09533 | 1.75893  |
| C | -4.1776  | -1.72628 | 0.67124  |
| O | -4.739   | -0.70219 | -0.20893 |
| C | -5.61972 | 1.47902  | -0.57653 |
| C | -4.35939 | 2.06105  | -1.2622  |
| C | -3.30251 | 2.56299  | -0.26496 |
| C | -2.17144 | 3.33365  | -0.96073 |
| C | -0.94562 | 3.60887  | -0.06285 |
| C | -0.34852 | 2.29757  | 0.42915  |
| C | 0.11216  | 4.45386  | -0.79607 |
| O | 0.0269   | 1.51593  | -0.60974 |
| O | -0.24567 | 1.96616  | 1.59361  |
| C | 0.46021  | 0.15745  | -0.29236 |
| C | 0.03704  | -0.70587 | -1.49125 |



|   |          |          |          |
|---|----------|----------|----------|
| C | 1.93302  | 0.14244  | -0.01048 |
| C | -0.02926 | -2.18376 | -1.15362 |
| C | -3.77186 | -2.90319 | -0.21279 |
| C | -2.57069 | -2.66974 | -1.15538 |
| C | -1.23533 | -2.65646 | -0.36451 |
| C | 0.94512  | -3.02187 | -1.52336 |
| C | -2.55021 | -3.73401 | -2.26122 |
| O | -6.01546 | -0.90262 | 3.68156  |
| O | -3.80702 | 1.13521  | -2.19523 |
| C | 2.55449  | 0.31324  | 1.1865   |
| O | 3.90454  | 0.26971  | 0.97314  |
| C | 4.04282  | 0.06599  | -0.3762  |
| N | 2.89489  | -0.00903 | -0.99791 |
| C | 5.34667  | -0.02163 | -1.00162 |
| C | 6.579    | -0.05776 | -0.45126 |
| C | 6.86322  | -0.01014 | 1.04774  |
| C | 7.79363  | -0.10579 | -1.34443 |
| C | 7.17458  | 1.41346  | 1.51863  |
| O | 7.99703  | -0.81151 | 1.38297  |
| C | 7.72009  | -2.19871 | 1.4098   |
| H | -6.20083 | 1.2311   | 2.11999  |
| H | -4.73396 | -2.7949  | 2.47139  |
| H | -6.05479 | -2.59164 | 1.31181  |
| H | -3.29991 | -1.26327 | 1.14447  |
| H | -6.15376 | 2.27315  | -0.0454  |
| H | -6.28218 | 1.11177  | -1.37207 |
| H | -4.6962  | 2.91032  | -1.87074 |
| H | -2.89787 | 1.69728  | 0.27766  |
| H | -3.78191 | 3.19889  | 0.49264  |
| H | -2.55719 | 4.2975   | -1.32057 |
| H | -1.84845 | 2.76958  | -1.84138 |
| H | -1.26342 | 4.13625  | 0.84381  |
| H | 0.97669  | 4.65554  | -0.1541  |
| H | -0.3178  | 5.41614  | -1.09529 |
| H | 0.46587  | 3.94048  | -1.69544 |
| H | -0.07147 | -0.1364  | 0.61567  |
| H | 0.73508  | -0.5299  | -2.31353 |
| H | -0.94594 | -0.33817 | -1.80919 |
| H | -4.65421 | -3.18754 | -0.80073 |

|   |          |          |          |
|---|----------|----------|----------|
| H | -3.54978 | -3.75572 | 0.44401  |
| H | -2.70129 | -1.69129 | -1.63747 |
| H | -1.35411 | -2.01664 | 0.52237  |
| H | -1.04977 | -3.67053 | 0.0139   |
| H | 0.91448  | -4.07963 | -1.27166 |
| H | 1.812    | -2.67414 | -2.07848 |
| H | -3.45858 | -3.68518 | -2.8725  |
| H | -2.48997 | -4.74262 | -1.83102 |
| H | -1.68737 | -3.60177 | -2.9209  |
| H | -3.8032  | 0.26957  | -1.75286 |
| H | 2.21856  | 0.49228  | 2.19493  |
| H | 5.25845  | -0.05024 | -2.08464 |
| H | 5.99259  | -0.3791  | 1.60221  |
| H | 7.51362  | -0.07165 | -2.40104 |
| H | 8.46372  | 0.73865  | -1.1383  |
| H | 8.38449  | -1.0108  | -1.1665  |
| H | 7.40204  | 1.40216  | 2.5891   |
| H | 6.3159   | 2.06846  | 1.34412  |
| H | 8.04213  | 1.82046  | 0.98921  |
| H | 6.92945  | -2.4376  | 2.13835  |
| H | 7.40904  | -2.5839  | 0.42655  |
| H | 8.64339  | -2.70131 | 1.71019  |

**Compound 1c:** Isomer 2S, 5R, 11R, 13R, 17S, 23S conformer 16

|   |          |          |          |
|---|----------|----------|----------|
| C | 2.73464  | -2.24733 | -0.11873 |
| C | 3.79251  | -2.81657 | 0.51274  |
| C | 5.15641  | -2.34145 | 0.30537  |
| C | 5.2784   | -1.21865 | -0.72656 |
| C | 4.03354  | -0.33406 | -0.74741 |
| O | 2.83161  | -1.13879 | -0.88913 |
| C | 1.31313  | -2.72693 | -0.01715 |
| C | 0.61497  | -2.33093 | 1.31055  |
| C | 0.73453  | -0.83725 | 1.60733  |
| C | 0.00205  | -0.39833 | 2.88172  |
| C | 0.20851  | 1.09118  | 3.2721   |
| C | -0.5937  | 2.03984  | 2.38517  |
| C | -0.13943 | 1.33971  | 4.74448  |
| O | -0.21384 | 1.94535  | 1.08475  |

|   |          |          |          |
|---|----------|----------|----------|
| O | -1.45901 | 2.79718  | 2.76828  |
| C | -0.93773 | 2.75506  | 0.11916  |
| C | -0.0851  | 2.77038  | -1.16056 |
| C | -2.31291 | 2.20766  | -0.12281 |
| C | 1.30395  | 3.36443  | -0.97076 |
| C | 4.04355  | 0.68261  | -1.88598 |
| C | 2.78799  | 1.56128  | -2.07606 |
| C | 2.47462  | 2.41333  | -0.81831 |
| C | 1.47128  | 4.69112  | -0.93517 |
| C | 2.97839  | 2.43232  | -3.32711 |
| O | 6.13779  | -2.82532 | 0.85376  |
| O | -0.77675 | -2.63031 | 1.2386   |
| C | -3.50812 | 2.81963  | 0.08252  |
| O | -4.49595 | 1.97847  | -0.33645 |
| C | -3.84142 | 0.85382  | -0.7743  |
| N | -2.54102 | 0.9538   | -0.67824 |
| C | -4.69801 | -0.20218 | -1.28225 |
| C | -4.39782 | -1.50719 | -1.4479  |
| C | -3.05416 | -2.11447 | -1.06758 |
| C | -5.41441 | -2.44225 | -2.05294 |
| C | -2.17205 | -2.33644 | -2.29702 |
| O | -3.22397 | -3.39614 | -0.44354 |
| C | -3.83145 | -3.32344 | 0.84067  |
| H | 3.64424  | -3.6885  | 1.14094  |
| H | 6.17096  | -0.62501 | -0.50726 |
| H | 5.42513  | -1.68018 | -1.7142  |
| H | 3.94158  | 0.17043  | 0.22547  |
| H | 1.28374  | -3.81949 | -0.11771 |
| H | 0.74281  | -2.2908  | -0.84334 |
| H | 1.07856  | -2.90655 | 2.12968  |
| H | 0.35157  | -0.28523 | 0.74628  |
| H | 1.8      | -0.59143 | 1.70835  |
| H | 0.36244  | -1.00359 | 3.72499  |
| H | -1.06879 | -0.61042 | 2.78756  |
| H | 1.26828  | 1.33613  | 3.10712  |
| H | -0.00604 | 2.3912   | 5.01379  |
| H | 0.50153  | 0.73002  | 5.39016  |
| H | -1.18301 | 1.07864  | 4.94764  |
| H | -1.02494 | 3.76538  | 0.52859  |

|   |          |          |          |
|---|----------|----------|----------|
| H | -0.64313 | 3.35614  | -1.9004  |
| H | -0.03573 | 1.74635  | -1.54412 |
| H | 4.22663  | 0.13575  | -2.82085 |
| H | 4.91855  | 1.33063  | -1.73161 |
| H | 1.94077  | 0.88684  | -2.25362 |
| H | 2.26568  | 1.73815  | 0.02111  |
| H | 3.36967  | 2.99293  | -0.55286 |
| H | 2.44839  | 5.14202  | -0.78065 |
| H | 0.637    | 5.37988  | -1.05413 |
| H | 3.18505  | 1.81332  | -4.20815 |
| H | 3.8214   | 3.12455  | -3.20036 |
| H | 2.09024  | 3.03517  | -3.53795 |
| H | -0.92288 | -3.46413 | 0.76427  |
| H | -3.81242 | 3.76676  | 0.49815  |
| H | -5.69507 | 0.14396  | -1.54594 |
| H | -2.52844 | -1.44794 | -0.37652 |
| H | -6.35511 | -1.92708 | -2.26801 |
| H | -5.03875 | -2.86864 | -2.9925  |
| H | -5.61903 | -3.29233 | -1.39405 |
| H | -1.23264 | -2.80907 | -1.99412 |
| H | -1.94507 | -1.37746 | -2.77174 |
| H | -2.6599  | -2.99082 | -3.02694 |
| H | -3.89176 | -4.34942 | 1.21537  |
| H | -3.22896 | -2.71971 | 1.5308   |
| H | -4.84752 | -2.90596 | 0.79485  |

**Compound 1c:** Isomer 2S, 5R, 11R, 13R, 17S, 23S conformer 17

|   |          |          |          |
|---|----------|----------|----------|
| C | -2.7476  | -2.10758 | -0.59778 |
| C | -3.92832 | -2.40476 | -1.19791 |
| C | -5.20854 | -2.07586 | -0.58134 |
| C | -5.09137 | -1.45198 | 0.81021  |
| C | -3.8167  | -0.6221  | 0.95184  |
| O | -2.65123 | -1.3915  | 0.5485   |
| C | -1.39534 | -2.47389 | -1.14365 |
| C | -0.92156 | -1.54857 | -2.29936 |
| C | -1.02808 | -0.06414 | -1.94554 |
| C | -0.5563  | 0.8772   | -3.06117 |
| C | -0.74525 | 2.38995  | -2.76254 |

|   |          |          |          |
|---|----------|----------|----------|
| C | 0.26544  | 2.90137  | -1.74011 |
| C | -0.66674 | 3.23106  | -4.04147 |
| O | 0.1214   | 2.27581  | -0.54395 |
| O | 1.10066  | 3.75642  | -1.94514 |
| C | 1.06914  | 2.62541  | 0.5068   |
| C | 0.45164  | 2.15933  | 1.83331  |
| C | 2.40591  | 1.99466  | 0.24692  |
| C | -0.91608 | 2.75936  | 2.12787  |
| C | -3.57987 | -0.13693 | 2.38013  |
| C | -2.269   | 0.62401  | 2.67403  |
| C | -2.14315 | 1.91938  | 1.82975  |
| C | -1.01839 | 3.99434  | 2.63143  |
| C | -2.189   | 0.91401  | 4.18053  |
| O | -6.29444 | -2.32194 | -1.08975 |
| O | 0.40797  | -1.90697 | -2.68148 |
| C | 3.53558  | 2.58587  | -0.22287 |
| O | 4.52483  | 1.64933  | -0.25692 |
| C | 3.93928  | 0.49388  | 0.19766  |
| N | 2.67741  | 0.65481  | 0.50772  |
| C | 4.82923  | -0.6455  | 0.29792  |
| C | 4.52388  | -1.92197 | 0.61402  |
| C | 3.10992  | -2.40804 | 0.91197  |
| C | 5.62209  | -2.94533 | 0.74861  |
| C | 2.78871  | -2.30382 | 2.40555  |
| O | 2.9428   | -3.77649 | 0.54816  |
| C | 2.80537  | -3.99395 | -0.84495 |
| H | -3.93698 | -2.95748 | -2.13137 |
| H | -5.97583 | -0.83739 | 1.00327  |
| H | -5.09008 | -2.26682 | 1.54909  |
| H | -3.86859 | 0.22777  | 0.25512  |
| H | -1.39836 | -3.50337 | -1.51483 |
| H | -0.66761 | -2.4129  | -0.32626 |
| H | -1.53111 | -1.76188 | -3.18561 |
| H | -0.45819 | 0.11868  | -1.02892 |
| H | -2.07507 | 0.1641   | -1.7079  |
| H | -1.12568 | 0.65514  | -3.97386 |
| H | 0.49373  | 0.6785   | -3.30823 |
| H | -1.73863 | 2.51764  | -2.30811 |
| H | -0.78884 | 4.29602  | -3.82499 |

|   |          |          |          |
|---|----------|----------|----------|
| H | -1.45198 | 2.92512  | -4.74076 |
| H | 0.30291  | 3.10488  | -4.53371 |
| H | 1.17881  | 3.71262  | 0.49609  |
| H | 1.16024  | 2.43956  | 2.62162  |
| H | 0.41503  | 1.06596  | 1.82495  |
| H | -3.62633 | -1.01247 | 3.04177  |
| H | -4.43563 | 0.49885  | 2.64987  |
| H | -1.43902 | -0.04278 | 2.40861  |
| H | -2.12731 | 1.64632  | 0.76683  |
| H | -3.03949 | 2.53373  | 1.99213  |
| H | -1.98289 | 4.453    | 2.83464  |
| H | -0.1415  | 4.59844  | 2.85628  |
| H | -2.27105 | -0.01103 | 4.76314  |
| H | -3.00193 | 1.5812   | 4.49632  |
| H | -1.24575 | 1.39951  | 4.44811  |
| H | 1.00935  | -1.53687 | -2.01362 |
| H | 3.7793   | 3.57696  | -0.56923 |
| H | 5.86893  | -0.38789 | 0.11132  |
| H | 2.38952  | -1.78669 | 0.36126  |
| H | 6.60761  | -2.4928  | 0.60617  |
| H | 5.59546  | -3.41254 | 1.74126  |
| H | 5.50511  | -3.76161 | 0.02784  |
| H | 1.78463  | -2.69885 | 2.58952  |
| H | 2.82555  | -1.25932 | 2.72593  |
| H | 3.50008  | -2.88711 | 2.99959  |
| H | 2.69308  | -5.07222 | -0.98609 |
| H | 1.91621  | -3.49137 | -1.25322 |
| H | 3.68506  | -3.65387 | -1.41248 |

**Compound 1c:** Isomer 2S, 5R, 11R, 13R, 17S, 23S conformer 20

|   |         |          |          |
|---|---------|----------|----------|
| C | 2.93644 | -2.04926 | 0.42014  |
| C | 4.1562  | -2.29594 | 0.9632   |
| C | 5.38856 | -1.84386 | 0.32739  |
| C | 5.17544 | -1.14713 | -1.01637 |
| C | 3.84681 | -0.39475 | -1.05259 |
| O | 2.74744 | -1.26759 | -0.66845 |
| C | 1.642   | -2.56679 | 0.9862   |
| C | 1.15026 | -1.75974 | 2.217    |

|   |          |          |          |
|---|----------|----------|----------|
| C | 0.88463  | -0.29334 | 1.89133  |
| C | 0.46322  | 0.53566  | 3.11379  |
| C | 0.58349  | 2.0739   | 2.94772  |
| C | -0.43965 | 2.64955  | 1.97299  |
| C | 0.47556  | 2.79124  | 4.29852  |
| O | -0.26463 | 2.16291  | 0.71895  |
| O | -1.30012 | 3.45564  | 2.25863  |
| C | -1.19425 | 2.63252  | -0.30279 |
| C | -0.54889 | 2.33102  | -1.66261 |
| C | -2.52975 | 1.96694  | -0.15302 |
| C | 0.81418  | 2.97583  | -1.86579 |
| C | 3.52749  | 0.17726  | -2.4307  |
| C | 2.18228  | 0.91227  | -2.6113  |
| C | 2.04604  | 2.11948  | -1.64673 |
| C | 0.91096  | 4.25987  | -2.22746 |
| C | 2.04102  | 1.33311  | -4.08207 |
| O | 6.50611  | -2.04772 | 0.7831   |
| O | -0.07019 | -2.31429 | 2.71163  |
| C | -3.68096 | 2.48159  | 0.35314  |
| O | -4.65137 | 1.52829  | 0.25914  |
| C | -4.02937 | 0.44177  | -0.30448 |
| N | -2.76873 | 0.66369  | -0.57286 |
| C | -4.87258 | -0.71632 | -0.52264 |
| C | -4.48669 | -1.96683 | -0.85312 |
| C | -3.03178 | -2.38034 | -1.04234 |
| C | -5.5204  | -3.03851 | -1.08537 |
| C | -2.61778 | -2.3221  | -2.51491 |
| O | -2.818   | -3.72195 | -0.60196 |
| C | -2.76502 | -3.85046 | 0.80939  |
| H | 4.23806  | -2.90683 | 1.85603  |
| H | 6.01033  | -0.4655  | -1.20455 |
| H | 5.19193  | -1.91383 | -1.80487 |
| H | 3.87227  | 0.40259  | -0.29545 |
| H | 1.77454  | -3.61312 | 1.28869  |
| H | 0.86815  | -2.53516 | 0.21266  |
| H | 1.9262   | -1.81883 | 2.99796  |
| H | 0.12569  | -0.2381  | 1.1057   |
| H | 1.804    | 0.12997  | 1.46897  |
| H | 1.10767  | 0.26473  | 3.96155  |

|   |          |          |          |
|---|----------|----------|----------|
| H | -0.55733 | 0.2712   | 3.4136   |
| H | 1.57176  | 2.28029  | 2.51085  |
| H | 0.56783  | 3.87469  | 4.18182  |
| H | 1.26645  | 2.44518  | 4.97259  |
| H | -0.49226 | 2.59355  | 4.77032  |
| H | -1.31124 | 3.71006  | -0.16341 |
| H | -1.2497  | 2.69174  | -2.42478 |
| H | -0.49859 | 1.24437  | -1.77753 |
| H | 3.57336  | -0.64811 | -3.15409 |
| H | 4.34842  | 0.86123  | -2.69085 |
| H | 1.38443  | 0.19498  | -2.3812  |
| H | 2.02847  | 1.74369  | -0.61561 |
| H | 2.93842  | 2.75344  | -1.74452 |
| H | 1.87377  | 4.74593  | -2.36423 |
| H | 0.03129  | 4.87789  | -2.39681 |
| H | 2.14908  | 0.46963  | -4.74903 |
| H | 2.81024  | 2.06685  | -4.35682 |
| H | 1.06756  | 1.79204  | -4.2789  |
| H | 0.11214  | -3.21338 | 3.02718  |
| H | -3.95321 | 3.4222   | 0.80333  |
| H | -5.9325  | -0.50754 | -0.39779 |
| H | -2.38581 | -1.69939 | -0.47416 |
| H | -6.53559 | -2.6401  | -1.00028 |
| H | -5.40524 | -3.48037 | -2.08336 |
| H | -5.40647 | -3.86405 | -0.37455 |
| H | -1.58178 | -2.66149 | -2.61465 |
| H | -2.69266 | -1.29599 | -2.88562 |
| H | -3.25013 | -2.97169 | -3.12944 |
| H | -2.57921 | -4.90793 | 1.02032  |
| H | -1.95629 | -3.24445 | 1.24293  |
| H | -3.71136 | -3.55839 | 1.29065  |

**Compound 1c:** Isomer 2S, 5R, 11R, 13R, 17S, 23S conformer 22

|   |         |          |          |
|---|---------|----------|----------|
| C | 5.03239 | 0.77026  | 0.43854  |
| C | 5.83036 | 0.73198  | -0.65909 |
| C | 6.1425  | -0.51701 | -1.34134 |
| C | 5.56524 | -1.75743 | -0.66086 |
| C | 4.23669 | -1.45979 | 0.02982  |



|   |          |          |          |
|---|----------|----------|----------|
| O | 4.3571   | -0.30152 | 0.91436  |
| C | 4.80046  | 2.01991  | 1.24568  |
| C | 3.58777  | 2.86735  | 0.7779   |
| C | 2.23857  | 2.25668  | 1.17636  |
| C | 1.02256  | 2.97855  | 0.5719   |
| C | 0.79002  | 2.72775  | -0.94243 |
| C | 0.62154  | 1.23365  | -1.16611 |
| C | -0.38979 | 3.55851  | -1.46749 |
| O | -0.63157 | 0.81565  | -0.87455 |
| O | 1.52143  | 0.48484  | -1.49974 |
| C | -0.84355 | -0.62941 | -0.86223 |
| C | -0.57155 | -1.15206 | 0.56747  |
| C | -2.23904 | -0.8839  | -1.33097 |
| C | -0.15912 | -2.60999 | 0.57864  |
| C | 3.74725  | -2.62257 | 0.8926   |
| C | 2.29082  | -2.53555 | 1.39623  |
| C | 1.29507  | -2.89527 | 0.25967  |
| C | -1.04291 | -3.581   | 0.83388  |
| C | 2.09331  | -3.44555 | 2.61647  |
| O | 6.85988  | -0.5959  | -2.33029 |
| O | 3.70905  | 4.2073   | 1.25829  |
| C | -2.64915 | -1.43835 | -2.50177 |
| O | -4.01241 | -1.48715 | -2.4972  |
| C | -4.38145 | -0.94137 | -1.29247 |
| N | -3.35676 | -0.58158 | -0.56471 |
| C | -5.80797 | -0.87818 | -1.04657 |
| C | -6.44393 | -0.24551 | -0.03748 |
| C | -5.72708 | 0.5362   | 1.0577   |
| C | -7.94514 | -0.31846 | 0.06982  |
| C | -5.51126 | -0.31928 | 2.30873  |
| O | -6.49054 | 1.67542  | 1.45867  |
| C | -6.40774 | 2.75666  | 0.54993  |
| H | 6.3179   | 1.63747  | -1.00368 |
| H | 5.43729  | -2.54757 | -1.40687 |
| H | 6.30061  | -2.11623 | 0.07474  |
| H | 3.49285  | -1.17263 | -0.72507 |
| H | 5.684    | 2.65961  | 1.16555  |
| H | 4.6739   | 1.74475  | 2.30148  |
| H | 3.65084  | 2.96462  | -0.31087 |

|   |          |          |          |
|---|----------|----------|----------|
| H | 2.16665  | 2.29432  | 2.27478  |
| H | 2.23561  | 1.19454  | 0.91179  |
| H | 1.14194  | 4.05817  | 0.72116  |
| H | 0.11423  | 2.67839  | 1.109    |
| H | 1.69716  | 2.9994   | -1.49242 |
| H | -0.55763 | 3.38481  | -2.53591 |
| H | -0.18435 | 4.62536  | -1.32708 |
| H | -1.31334 | 3.31139  | -0.93596 |
| H | -0.13521 | -1.06496 | -1.56934 |
| H | -1.46662 | -0.98536 | 1.17317  |
| H | 0.23071  | -0.53881 | 0.99152  |
| H | 4.43078  | -2.69749 | 1.74845  |
| H | 3.87336  | -3.54958 | 0.3156   |
| H | 2.11052  | -1.49923 | 1.71238  |
| H | 1.5774   | -2.33385 | -0.64165 |
| H | 1.41741  | -3.96015 | 0.02024  |
| H | -0.76006 | -4.63092 | 0.81597  |
| H | -2.08183 | -3.36075 | 1.06706  |
| H | 2.74199  | -3.13884 | 3.44516  |
| H | 2.33752  | -4.48771 | 2.37024  |
| H | 1.05693  | -3.42208 | 2.96754  |
| H | 3.6045   | 4.18076  | 2.22392  |
| H | -2.14905 | -1.83135 | -3.37284 |
| H | -6.39689 | -1.4169  | -1.785   |
| H | -4.74671 | 0.86226  | 0.68945  |
| H | -8.37244 | -0.95086 | -0.71369 |
| H | -8.24709 | -0.72401 | 1.04395  |
| H | -8.39809 | 0.67672  | 0.00402  |
| H | -5.02678 | 0.28514  | 3.08187  |
| H | -4.87132 | -1.17487 | 2.07449  |
| H | -6.46342 | -0.68485 | 2.7074   |
| H | -6.99734 | 3.57421  | 0.97364  |
| H | -5.36797 | 3.09452  | 0.41917  |
| H | -6.81336 | 2.50342  | -0.44189 |

**Compound 1c:** Isomer 2S, 5R, 11R, 13R, 17S, 23S conformer 25

|   |         |          |          |
|---|---------|----------|----------|
| C | 5.09547 | -0.59792 | -0.53721 |
| C | 5.8613  | -0.7083  | 0.57523  |

**S218**

|   |          |          |          |
|---|----------|----------|----------|
| C | 6.14349  | 0.43821  | 1.43538  |
| C | 5.54652  | 1.75478  | 0.93817  |
| C | 4.22798  | 1.52576  | 0.20643  |
| O | 4.40106  | 0.53242  | -0.85247 |
| C | 4.92915  | -1.67269 | -1.57522 |
| C | 3.46995  | -2.12827 | -1.82451 |
| C | 2.76386  | -2.62197 | -0.55157 |
| C | 1.41353  | -3.28549 | -0.85807 |
| C | 0.52475  | -3.51833 | 0.38382  |
| C | 0.22169  | -2.1911  | 1.06605  |
| C | -0.77229 | -4.26182 | 0.01812  |
| O | -0.42542 | -1.35058 | 0.22402  |
| O | 0.54338  | -1.89481 | 2.19897  |
| C | -0.62895 | 0.01998  | 0.68477  |
| C | -0.50748 | 0.90434  | -0.5679  |
| C | -1.94349 | 0.1303   | 1.3936   |
| C | -0.22719 | 2.35736  | -0.23415 |
| C | 3.66698  | 2.78562  | -0.44916 |
| C | 2.22282  | 2.69329  | -0.98823 |
| C | 1.19141  | 2.70773  | 0.17211  |
| C | -1.19314 | 3.28077  | -0.28556 |
| C | 1.9551   | 3.83166  | -1.98246 |
| O | 6.84796  | 0.3818   | 2.43325  |
| O | 2.71834  | -1.11083 | -2.48331 |
| C | -2.17827 | 0.0888   | 2.73155  |
| O | -3.52285 | 0.20193  | 2.93175  |
| C | -4.06201 | 0.30164  | 1.67314  |
| N | -3.15587 | 0.27058  | 0.73027  |
| C | -5.50402 | 0.42771  | 1.62158  |
| C | -6.30179 | 0.37205  | 0.53419  |
| C | -5.77245 | 0.18676  | -0.87633 |
| C | -7.79217 | 0.52664  | 0.68039  |
| C | -5.46539 | 1.54374  | -1.532   |
| O | -6.76703 | -0.53439 | -1.61022 |
| C | -6.2702  | -1.20975 | -2.74655 |
| H | 6.35762  | -1.64583 | 0.79868  |
| H | 5.39985  | 2.4255   | 1.78989  |
| H | 6.27311  | 2.23131  | 0.26387  |
| H | 3.50606  | 1.08702  | 0.91013  |

|   |          |          |          |
|---|----------|----------|----------|
| H | 5.54178  | -2.53188 | -1.28465 |
| H | 5.32087  | -1.29626 | -2.52988 |
| H | 3.51658  | -2.95701 | -2.54279 |
| H | 2.62509  | -1.76511 | 0.12195  |
| H | 3.41646  | -3.32557 | -0.01574 |
| H | 1.58794  | -4.25603 | -1.3428  |
| H | 0.86657  | -2.6642  | -1.57441 |
| H | 1.07838  | -4.1021  | 1.12805  |
| H | -1.39696 | -4.43225 | 0.90175  |
| H | -0.53496 | -5.23722 | -0.4209  |
| H | -1.35723 | -3.6904  | -0.70913 |
| H | 0.16842  | 0.23305  | 1.4005   |
| H | -1.42748 | 0.81216  | -1.15096 |
| H | 0.3063   | 0.48323  | -1.17065 |
| H | 4.34917  | 3.05933  | -1.26452 |
| H | 3.72231  | 3.59973  | 0.2869   |
| H | 2.12228  | 1.74497  | -1.53346 |
| H | 1.52336  | 2.00675  | 0.95173  |
| H | 1.20556  | 3.70489  | 0.63176  |
| H | -1.004   | 4.32079  | -0.02987 |
| H | -2.20884 | 3.02624  | -0.57626 |
| H | 2.62944  | 3.76896  | -2.84417 |
| H | 2.10964  | 4.8093   | -1.50682 |
| H | 0.92573  | 3.80018  | -2.35192 |
| H | 2.93361  | -0.27676 | -2.03267 |
| H | -1.55524 | -0.02329 | 3.60421  |
| H | -5.95991 | 0.57109  | 2.59793  |
| H | -4.84522 | -0.3992  | -0.84006 |
| H | -8.07435 | 0.7085   | 1.72144  |
| H | -8.16382 | 1.35913  | 0.06868  |
| H | -8.30631 | -0.37011 | 0.31964  |
| H | -5.10897 | 1.40686  | -2.55864 |
| H | -4.6838  | 2.06287  | -0.96994 |
| H | -6.36195 | 2.17209  | -1.56209 |
| H | -7.10731 | -1.77155 | -3.17027 |
| H | -5.88684 | -0.52255 | -3.5156  |
| H | -5.46619 | -1.914   | -2.4803  |

**Compound 1c:** Isomer 2S, 5R, 11R, 13R, 17S, 23S conformer 28

|   |          |          |          |
|---|----------|----------|----------|
| C | 5.02726  | 0.75077  | 0.43457  |
| C | 5.82059  | 0.7151   | -0.66708 |
| C | 6.12464  | -0.53012 | -1.35889 |
| C | 5.54617  | -1.77219 | -0.68289 |
| C | 4.22252  | -1.47436 | 0.01739  |
| O | 4.35011  | -0.31993 | 0.90617  |
| C | 4.80323  | 1.99653  | 1.24977  |
| C | 3.59959  | 2.85805  | 0.78066  |
| C | 2.25202  | 2.27606  | 1.2065   |
| C | 1.03476  | 2.99648  | 0.60282  |
| C | 0.79138  | 2.74746  | -0.91035 |
| C | 0.62715  | 1.25382  | -1.13842 |
| C | -0.39552 | 3.57509  | -1.42461 |
| O | -0.62518 | 0.83144  | -0.84948 |
| O | 1.52907  | 0.50866  | -1.47505 |
| C | -0.83533 | -0.61364 | -0.84644 |
| C | -0.57132 | -1.14352 | 0.58171  |
| C | -2.22735 | -0.86812 | -1.32569 |
| C | -0.17067 | -2.60472 | 0.58849  |
| C | 3.73639  | -2.63936 | 0.87902  |
| C | 2.28389  | -2.54934 | 1.39293  |
| C | 1.27948  | -2.90131 | 0.26176  |
| C | -1.06062 | -3.56916 | 0.84706  |
| C | 2.09101  | -3.46312 | 2.61101  |
| O | 6.83699  | -0.60485 | -2.35202 |
| O | 3.67309  | 4.16078  | 1.3637   |
| C | -2.62818 | -1.4165  | -2.50255 |
| O | -3.99134 | -1.46937 | -2.50733 |
| C | -4.36978 | -0.93221 | -1.30159 |
| N | -3.35096 | -0.57383 | -0.56499 |
| C | -5.79806 | -0.87507 | -1.06451 |
| C | -6.44255 | -0.25028 | -0.05593 |
| C | -5.73558 | 0.52775  | 1.04825  |
| C | -7.94418 | -0.32874 | 0.04114  |
| C | -5.5254  | -0.33357 | 2.29621  |
| O | -6.50569 | 1.66232  | 1.4498   |
| C | -6.41898 | 2.74907  | 0.54808  |
| H | 6.31248  | 1.61952  | -1.00868 |

|   |          |          |          |
|---|----------|----------|----------|
| H | 5.4109   | -2.55738 | -1.43283 |
| H | 6.28452  | -2.13826 | 0.0461   |
| H | 3.47437  | -1.18207 | -0.73111 |
| H | 5.70555  | 2.61504  | 1.18054  |
| H | 4.66555  | 1.72991  | 2.30382  |
| H | 3.64751  | 2.93229  | -0.3165  |
| H | 2.20208  | 2.35216  | 2.30052  |
| H | 2.237    | 1.20967  | 0.96184  |
| H | 1.15015  | 4.07548  | 0.756    |
| H | 0.13052  | 2.69285  | 1.1451   |
| H | 1.69303  | 3.02309  | -1.46775 |
| H | -0.57087 | 3.40482  | -2.49247 |
| H | -0.19425 | 4.6424   | -1.28096 |
| H | -1.31402 | 3.32234  | -0.88714 |
| H | -0.12199 | -1.04421 | -1.55162 |
| H | -1.46664 | -0.97214 | 1.1857   |
| H | 0.23454  | -0.53788 | 1.00997  |
| H | 4.42566  | -2.71925 | 1.72979  |
| H | 3.85594  | -3.56449 | 0.29756  |
| H | 2.10947  | -1.51367 | 1.71406  |
| H | 1.56143  | -2.34206 | -0.64106 |
| H | 1.39231  | -3.967   | 0.0212   |
| H | -0.78593 | -4.62122 | 0.82674  |
| H | -2.0966  | -3.34109 | 1.08565  |
| H | 2.74508  | -3.16094 | 3.43708  |
| H | 2.33076  | -4.50514 | 2.35974  |
| H | 1.05672  | -3.43764 | 2.96803  |
| H | 4.43409  | 4.62123  | 0.97727  |
| H | -2.1212  | -1.80281 | -3.37264 |
| H | -6.38045 | -1.41149 | -1.80977 |
| H | -4.75382 | 0.85891  | 0.68843  |
| H | -8.36435 | -0.95765 | -0.74903 |
| H | -8.25113 | -0.74127 | 1.01076  |
| H | -8.39981 | 0.66543  | -0.02138 |
| H | -5.048   | 0.26834  | 3.07565  |
| H | -4.88107 | -1.18582 | 2.06178  |
| H | -6.47899 | -0.70435 | 2.68657  |
| H | -7.01405 | 3.5625   | 0.97207  |
| H | -5.37921 | 3.09055  | 0.42727  |

H -6.8164 2.50049 -0.44829

**Compound 1c:** Isomer 2S, 5R, 11R, 13R, 17S, 23S conformer 33

|   |          |          |          |
|---|----------|----------|----------|
| C | 5.01932  | -0.38132 | 0.08736  |
| C | 5.61308  | -0.15452 | 1.2876   |
| C | 5.69724  | 1.17996  | 1.86801  |
| C | 5.13355  | 2.28012  | 0.97013  |
| C | 3.95922  | 1.77254  | 0.13864  |
| O | 4.32182  | 0.56105  | -0.59075 |
| C | 5.08952  | -1.70098 | -0.63142 |
| C | 3.83168  | -2.6067  | -0.52303 |
| C | 2.70722  | -2.18659 | -1.4704  |
| C | 1.48046  | -3.11465 | -1.46548 |
| C | 0.77061  | -3.28413 | -0.1018  |
| C | 0.48299  | -1.92794 | 0.52103  |
| C | -0.50876 | -4.12725 | -0.24221 |
| O | -0.37512 | -1.20775 | -0.23969 |
| O | 0.98893  | -1.51115 | 1.54523  |
| C | -0.6063  | 0.17753  | 0.16921  |
| C | -0.72098 | 0.99647  | -1.12553 |
| C | -1.81252 | 0.25152  | 1.0532   |
| C | -0.44586 | 2.47477  | -0.92754 |
| C | 3.4715   | 2.7854   | -0.8968  |
| C | 2.08417  | 2.50514  | -1.5123  |
| C | 0.95744  | 2.8796   | -0.51452 |
| C | -1.41022 | 3.38299  | -1.1104  |
| C | 1.91978  | 3.26103  | -2.83808 |
| O | 6.23254  | 1.42753  | 2.94048  |
| O | 4.17994  | -3.94622 | -0.88171 |
| C | -1.85558 | 0.23344  | 2.41215  |
| O | -3.16241 | 0.29066  | 2.79725  |
| C | -3.87627 | 0.3367   | 1.62514  |
| N | -3.11037 | 0.32249  | 0.56543  |
| C | -5.31598 | 0.40248  | 1.77669  |
| C | -6.25512 | 0.32247  | 0.81015  |
| C | -5.93314 | 0.15695  | -0.67071 |
| C | -7.71485 | 0.43826  | 1.16533  |
| C | -5.90596 | 1.50779  | -1.39084 |

|   |          |          |          |
|---|----------|----------|----------|
| O | -6.91857 | -0.64383 | -1.32609 |
| C | -6.76702 | -2.02997 | -1.08734 |
| H | 6.12653  | -0.962   | 1.79769  |
| H | 4.82416  | 3.12702  | 1.58986  |
| H | 5.93935  | 2.6321   | 0.30913  |
| H | 3.14887  | 1.47515  | 0.81999  |
| H | 5.93562  | -2.25753 | -0.21332 |
| H | 5.30973  | -1.52638 | -1.69186 |
| H | 3.4708   | -2.57309 | 0.51558  |
| H | 3.115    | -2.15953 | -2.48955 |
| H | 2.41709  | -1.15816 | -1.22654 |
| H | 1.78559  | -4.1092  | -1.80709 |
| H | 0.75283  | -2.73114 | -2.19091 |
| H | 1.44899  | -3.78345 | 0.59722  |
| H | -0.99313 | -4.28358 | 0.72805  |
| H | -0.26376 | -5.11025 | -0.65919 |
| H | -1.22747 | -3.64006 | -0.90826 |
| H | 0.2672   | 0.47391  | 0.75153  |
| H | -1.71591 | 0.84837  | -1.55319 |
| H | 0.00388  | 0.57299  | -1.83121 |
| H | 4.22975  | 2.82536  | -1.68933 |
| H | 3.46278  | 3.77848  | -0.42633 |
| H | 2.03104  | 1.42928  | -1.72621 |
| H | 1.18822  | 2.43095  | 0.46279  |
| H | 0.98227  | 3.96622  | -0.35778 |
| H | -1.22618 | 4.44703  | -0.98132 |
| H | -2.42002 | 3.0935   | -1.38959 |
| H | 2.67054  | 2.94192  | -3.57004 |
| H | 2.03719  | 4.34259  | -2.68843 |
| H | 0.92811  | 3.09536  | -3.27137 |
| H | 4.77422  | -4.29526 | -0.19956 |
| H | -1.11154 | 0.17376  | 3.19021  |
| H | -5.63299 | 0.53367  | 2.80849  |
| H | -4.94783 | -0.31247 | -0.77819 |
| H | -7.8536  | 0.62043  | 2.23497  |
| H | -8.18798 | 1.25883  | 0.61089  |
| H | -8.2644  | -0.46818 | 0.88908  |
| H | -5.70355 | 1.34878  | -2.45464 |
| H | -5.12105 | 2.14291  | -0.96968 |



|   |          |          |          |
|---|----------|----------|----------|
| H | -6.86765 | 2.02361  | -1.29914 |
| H | -7.54918 | -2.53853 | -1.65764 |
| H | -5.78373 | -2.39214 | -1.42552 |
| H | -6.87962 | -2.28769 | -0.0227  |

**Compound 1c:** Isomer 2S, 5R, 11R, 13R, 17S, 23S conformer 39

|   |          |          |          |
|---|----------|----------|----------|
| C | 4.86318  | -0.97567 | -0.3385  |
| C | 5.13358  | -1.31825 | -1.62421 |
| C | 4.48034  | -2.44552 | -2.27564 |
| C | 3.54865  | -3.23724 | -1.35916 |
| C | 2.88877  | -2.34613 | -0.30945 |
| O | 3.88755  | -1.54852 | 0.40138  |
| C | 5.61671  | 0.09412  | 0.40643  |
| C | 5.00807  | 1.51587  | 0.27086  |
| C | 3.77154  | 1.71777  | 1.14652  |
| C | 3.03418  | 3.0457   | 0.90573  |
| C | 2.28082  | 3.16404  | -0.44782 |
| C | 1.3041   | 2.00687  | -0.56353 |
| C | 1.62495  | 4.54371  | -0.59888 |
| O | 0.13488  | 2.25562  | 0.07742  |
| O | 1.56168  | 0.94791  | -1.10132 |
| C | -0.78605 | 1.13912  | 0.20482  |
| C | -0.5312  | 0.4719   | 1.58298  |
| C | -2.16842 | 1.6866   | 0.03007  |
| C | -0.9925  | -0.96794 | 1.66901  |
| C | 2.13234  | -3.14322 | 0.75265  |
| C | 1.20448  | -2.32772 | 1.67839  |
| C | -0.13131 | -1.9931  | 0.95826  |
| C | -2.0877  | -1.30828 | 2.357    |
| C | 0.95452  | -3.08575 | 2.98948  |
| O | 4.69968  | -2.78914 | -3.43011 |
| O | 5.95683  | 2.499    | 0.69029  |
| C | -2.6215  | 2.96209  | 0.15642  |
| O | -3.96532 | 2.9583   | -0.0983  |
| C | -4.27242 | 1.65087  | -0.36828 |
| N | -3.22885 | 0.86273  | -0.31274 |
| C | -5.66156 | 1.38078  | -0.67822 |
| C | -6.25043 | 0.17691  | -0.84312 |

|   |          |          |          |
|---|----------|----------|----------|
| C | -5.51001 | -1.15105 | -0.73028 |
| C | -7.71241 | 0.09521  | -1.1991  |
| C | -5.05572 | -1.65646 | -2.10216 |
| O | -6.3527  | -2.16176 | -0.17088 |
| C | -6.49474 | -2.06103 | 1.23244  |
| H | 5.91191  | -0.79651 | -2.17067 |
| H | 2.78715  | -3.73501 | -1.96699 |
| H | 4.14195  | -4.02309 | -0.86809 |
| H | 2.23832  | -1.61697 | -0.81015 |
| H | 6.63819  | 0.12826  | 0.01041  |
| H | 5.68274  | -0.17015 | 1.46798  |
| H | 4.74812  | 1.66901  | -0.78735 |
| H | 4.10935  | 1.68777  | 2.19067  |
| H | 3.09945  | 0.8658   | 1.00616  |
| H | 3.75639  | 3.86787  | 0.96279  |
| H | 2.3077   | 3.2036   | 1.71323  |
| H | 2.99455  | 3.01427  | -1.2647  |
| H | 1.08287  | 4.62977  | -1.54679 |
| H | 2.39309  | 5.32439  | -0.57678 |
| H | 0.91916  | 4.73757  | 0.21448  |
| H | -0.57446 | 0.43104  | -0.5982  |
| H | -1.00231 | 1.08135  | 2.36102  |
| H | 0.55195  | 0.51397  | 1.75132  |
| H | 2.88414  | -3.67189 | 1.35296  |
| H | 1.54344  | -3.91858 | 0.2428   |
| H | 1.72188  | -1.3905  | 1.92352  |
| H | 0.09667  | -1.63174 | -0.05371 |
| H | -0.69821 | -2.92531 | 0.83469  |
| H | -2.42422 | -2.34038 | 2.41935  |
| H | -2.69066 | -0.5676  | 2.87625  |
| H | 1.89149  | -3.24661 | 3.53512  |
| H | 0.50957  | -4.07052 | 2.79316  |
| H | 0.26987  | -2.53574 | 3.64267  |
| H | 6.68488  | 2.50791  | 0.0497   |
| H | -2.16709 | 3.91368  | 0.37596  |
| H | -6.262   | 2.28069  | -0.78773 |
| H | -4.62245 | -1.02282 | -0.09937 |
| H | -8.14866 | 1.08947  | -1.33241 |
| H | -7.85583 | -0.47293 | -2.12706 |

|   |          |          |          |
|---|----------|----------|----------|
| H | -8.28095 | -0.43742 | -0.42895 |
| H | -4.56775 | -2.62924 | -1.98656 |
| H | -4.34396 | -0.95376 | -2.54453 |
| H | -5.90634 | -1.77861 | -2.78104 |
| H | -7.12302 | -2.89775 | 1.55029  |
| H | -5.52083 | -2.12958 | 1.74194  |
| H | -6.97632 | -1.11945 | 1.53975  |

**Compound 1c:** Isomer 2S, 5R, 11R, 13R, 17S, 23S conformer 45

|   |          |          |          |
|---|----------|----------|----------|
| C | 2.87806  | -2.43016 | -0.25443 |
| C | 3.87862  | -3.1479  | 0.31786  |
| C | 5.28209  | -2.85959 | 0.05119  |
| C | 5.51282  | -1.75429 | -0.98195 |
| C | 4.39889  | -0.70876 | -0.95803 |
| O | 3.09465  | -1.34066 | -1.03237 |
| C | 1.40878  | -2.68623 | -0.0752  |
| C | 0.81812  | -2.20551 | 1.29063  |
| C | 1.42823  | -0.87839 | 1.76561  |
| C | 0.7617   | -0.306   | 3.02616  |
| C | 1.0468   | 1.20454  | 3.27578  |
| C | 0.16931  | 2.0552   | 2.36503  |
| C | 0.81991  | 1.59517  | 4.73949  |
| O | 0.52089  | 1.89306  | 1.05917  |
| O | -0.74672 | 2.76453  | 2.7165   |
| C | -0.33853 | 2.46919  | 0.05119  |
| C | 0.42961  | 2.36337  | -1.28036 |
| C | -1.65499 | 1.74531  | 0.00087  |
| C | 1.79655  | 3.03609  | -1.25768 |
| C | 4.49509  | 0.29007  | -2.11161 |
| C | 3.30007  | 1.24278  | -2.33468 |
| C | 3.01558  | 2.14643  | -1.10695 |
| C | 1.8986   | 4.36552  | -1.36294 |
| C | 3.55053  | 2.07356  | -3.60256 |
| O | 6.21431  | -3.47482 | 0.55318  |
| O | -0.59552 | -2.12139 | 1.17154  |
| C | -2.9055  | 2.26715  | -0.0607  |
| O | -3.79828 | 1.23121  | -0.1444  |
| C | -3.03702 | 0.09859  | -0.12473 |

|   |          |          |          |
|---|----------|----------|----------|
| N | -1.75319 | 0.35929  | -0.04116 |
| C | -3.62794 | -1.22355 | -0.15392 |
| C | -4.90975 | -1.59011 | -0.37144 |
| C | -6.05696 | -0.62355 | -0.6524  |
| C | -5.28466 | -3.04878 | -0.30037 |
| C | -6.8296  | -0.28113 | 0.62492  |
| O | -6.99717 | -1.19133 | -1.5637  |
| C | -6.56273 | -1.17232 | -2.91022 |
| H | 3.64087  | -3.99344 | 0.9546   |
| H | 6.48549  | -1.28815 | -0.79724 |
| H | 5.55872  | -2.22604 | -1.9746  |
| H | 4.42179  | -0.18724 | 0.0102   |
| H | 1.18646  | -3.75191 | -0.18992 |
| H | 0.87763  | -2.14951 | -0.86793 |
| H | 1.00292  | -2.98318 | 2.04214  |
| H | 1.34669  | -0.15909 | 0.94754  |
| H | 2.49954  | -1.02399 | 1.95314  |
| H | 1.11011  | -0.86113 | 3.90686  |
| H | -0.32116 | -0.4655  | 2.97488  |
| H | 2.09174  | 1.40572  | 3.00109  |
| H | 0.9977   | 2.6628   | 4.90026  |
| H | 1.49661  | 1.02912  | 5.38828  |
| H | -0.20991 | 1.38345  | 5.04394  |
| H | -0.51591 | 3.51867  | 0.30467  |
| H | -0.2053  | 2.81999  | -2.04869 |
| H | 0.51844  | 1.3019   | -1.53451 |
| H | 4.64926  | -0.2795  | -3.03804 |
| H | 5.41135  | 0.87785  | -1.95632 |
| H | 2.41774  | 0.61407  | -2.50767 |
| H | 2.87284  | 1.5135   | -0.22242 |
| H | 3.89783  | 2.77255  | -0.91562 |
| H | 2.86023  | 4.87115  | -1.32655 |
| H | 1.02482  | 5.00307  | -1.48437 |
| H | 3.70311  | 1.42579  | -4.47381 |
| H | 4.44621  | 2.6993   | -3.49181 |
| H | 2.70975  | 2.73974  | -3.81765 |
| H | -0.80447 | -1.28402 | 0.70392  |
| H | -3.31788 | 3.26286  | -0.0349  |
| H | -2.89157 | -1.99662 | 0.05087  |

|   |          |          |          |
|---|----------|----------|----------|
| H | -5.66291 | 0.30504  | -1.08262 |
| H | -4.4282  | -3.66674 | -0.01799 |
| H | -6.08409 | -3.20956 | 0.43394  |
| H | -5.67799 | -3.40695 | -1.258   |
| H | -7.65891 | 0.3896   | 0.37984  |
| H | -6.17333 | 0.21277  | 1.34739  |
| H | -7.24476 | -1.18343 | 1.08514  |
| H | -7.37077 | -1.59846 | -3.51061 |
| H | -6.36455 | -0.14509 | -3.25464 |
| H | -5.65111 | -1.76936 | -3.06574 |

**Compound 1c:** Isomer 2S, 5R, 11R, 13R, 17S, 23S conformer 49

|   |          |          |          |
|---|----------|----------|----------|
| C | -5.00604 | 0.36123  | 0.07376  |
| C | -5.60298 | 0.09985  | 1.26533  |
| C | -5.67844 | -1.24926 | 1.81202  |
| C | -5.10129 | -2.32207 | 0.88988  |
| C | -3.92768 | -1.78408 | 0.07663  |
| O | -4.29788 | -0.55831 | -0.62446 |
| C | -5.08413 | 1.69769  | -0.61245 |
| C | -3.83304 | 2.60912  | -0.47804 |
| C | -2.70193 | 2.21673  | -1.42906 |
| C | -1.4783  | 3.14829  | -1.39448 |
| C | -0.77768 | 3.28921  | -0.02226 |
| C | -0.49796 | 1.91868  | 0.57205  |
| C | 0.50216  | 4.13514  | -0.13556 |
| O | 0.38178  | 1.2221   | -0.18599 |
| O | -1.0291  | 1.47198  | 1.57056  |
| C | 0.60909  | -0.17234 | 0.1923   |
| C | 0.76103  | -0.9558  | -1.1206  |
| C | 1.79104  | -0.26499 | 1.10609  |
| C | 0.49019  | -2.44054 | -0.97051 |
| C | -3.42629 | -2.76642 | -0.98145 |
| C | -2.03552 | -2.46197 | -1.57803 |
| C | -0.91515 | -2.86438 | -0.58393 |
| C | 1.45979  | -3.33914 | -1.17237 |
| C | -1.85809 | -3.17484 | -2.92571 |
| O | -6.21658 | -1.52808 | 2.87537  |
| O | -4.18858 | 3.95392  | -0.80918 |

|   |          |          |          |
|---|----------|----------|----------|
| C | 1.79396  | -0.31288 | 2.46463  |
| O | 3.09013  | -0.36149 | 2.88583  |
| C | 3.8388   | -0.33363 | 1.7351   |
| N | 3.10396  | -0.28393 | 0.65416  |
| C | 5.27397  | -0.36609 | 1.92652  |
| C | 6.23744  | -0.21323 | 0.99363  |
| C | 5.94118  | -0.01151 | -0.48155 |
| C | 7.68907  | -0.27374 | 1.38717  |
| C | 5.83645  | -1.36377 | -1.20757 |
| O | 6.99634  | 0.79129  | -1.02002 |
| C | 6.65474  | 1.47206  | -2.20895 |
| H | -6.12497 | 0.89035  | 1.793    |
| H | -4.78749 | -3.18145 | 1.48991  |
| H | -5.90103 | -2.66432 | 0.21651  |
| H | -3.12306 | -1.49623 | 0.76876  |
| H | -5.9355  | 2.23775  | -0.18359 |
| H | -5.29975 | 1.54764  | -1.67761 |
| H | -3.47647 | 2.55511  | 0.56106  |
| H | -3.10401 | 2.21367  | -2.45086 |
| H | -2.40978 | 1.18355  | -1.2093  |
| H | -1.78431 | 4.14947  | -1.71536 |
| H | -0.74454 | 2.78364  | -2.12353 |
| H | -1.46181 | 3.7736   | 0.68156  |
| H | 0.97929  | 4.27143  | 0.84124  |
| H | 0.2598   | 5.12652  | -0.53385 |
| H | 1.22636  | 3.66218  | -0.80579 |
| H | -0.27773 | -0.48834 | 0.74319  |
| H | 1.76561  | -0.79041 | -1.51865 |
| H | 0.05152  | -0.51741 | -1.83299 |
| H | -4.17812 | -2.78921 | -1.78073 |
| H | -3.41553 | -3.77175 | -0.53787 |
| H | -1.98467 | -1.37967 | -1.75739 |
| H | -1.15614 | -2.44986 | 0.40579  |
| H | -0.93641 | -3.95576 | -0.464   |
| H | 1.27869  | -4.40737 | -1.07867 |
| H | 2.47123  | -3.03792 | -1.43266 |
| H | -2.60382 | -2.83492 | -3.65344 |
| H | -1.97317 | -4.26092 | -2.81129 |
| H | -0.86335 | -2.99237 | -3.34506 |

|   |          |          |          |
|---|----------|----------|----------|
| H | -4.78505 | 4.28538  | -0.12021 |
| H | 1.0268   | -0.30652 | 3.22222  |
| H | 5.56751  | -0.52303 | 2.96125  |
| H | 4.98549  | 0.51659  | -0.5901  |
| H | 7.80547  | -0.47855 | 2.45536  |
| H | 8.21812  | -1.0531  | 0.8234   |
| H | 8.18931  | 0.66959  | 1.14504  |
| H | 5.659    | -1.21683 | -2.27849 |
| H | 5.0012   | -1.94199 | -0.80197 |
| H | 6.76084  | -1.9392  | -1.08965 |
| H | 7.51158  | 2.09925  | -2.47046 |
| H | 6.45457  | 0.78852  | -3.0477  |
| H | 5.77149  | 2.11516  | -2.06848 |

**Compound 1c:** Isomer 2S, 5R, 11R, 13R, 17S, 23S conformer 55

|   |          |          |          |
|---|----------|----------|----------|
| C | 3.50777  | -2.30004 | -0.4896  |
| C | 4.63516  | -2.78247 | 0.09886  |
| C | 5.94198  | -2.17441 | -0.12195 |
| C | 5.92179  | -0.98946 | -1.08842 |
| C | 4.5954   | -0.2401  | -0.99801 |
| O | 3.48003  | -1.14952 | -1.19605 |
| C | 2.17531  | -2.99318 | -0.42621 |
| C | 1.03069  | -2.21868 | 0.27359  |
| C | 1.50836  | -1.4465  | 1.5187   |
| C | 0.40232  | -1.14403 | 2.54866  |
| C | 0.65796  | 0.13796  | 3.39887  |
| C | -0.02897 | 1.32552  | 2.73429  |
| C | 0.18584  | -0.00152 | 4.84948  |
| O | 0.34672  | 1.44186  | 1.43121  |
| O | -0.84841 | 2.05103  | 3.25293  |
| C | -0.47987 | 2.28195  | 0.58609  |
| C | 0.27223  | 2.44895  | -0.74461 |
| C | -1.81111 | 1.61579  | 0.38675  |
| C | 1.59347  | 3.19555  | -0.62433 |
| C | 4.45379  | 0.8814   | -2.02097 |
| C | 3.11479  | 1.64868  | -2.02375 |
| C | 2.8689   | 2.38121  | -0.6781  |
| C | 1.6109   | 4.52478  | -0.4766  |

|   |          |          |          |
|---|----------|----------|----------|
| C | 3.09104  | 2.6205   | -3.21284 |
| O | 6.9828   | -2.59402 | 0.36859  |
| O | 0.44333  | -1.37317 | -0.70406 |
| C | -3.06568 | 2.10014  | 0.56168  |
| O | -3.95569 | 1.11621  | 0.21259  |
| C | -3.18673 | 0.053    | -0.16275 |
| N | -1.9045  | 0.30759  | -0.06931 |
| C | -3.75791 | -1.20497 | -0.59395 |
| C | -5.04718 | -1.55343 | -0.7944  |
| C | -6.2422  | -0.628   | -0.57796 |
| C | -5.37877 | -2.96174 | -1.21803 |
| C | -6.84432 | -0.80867 | 0.81879  |
| O | -7.28176 | -0.90309 | -1.51527 |
| C | -7.0366  | -0.37333 | -2.80498 |
| H | 4.5923   | -3.693   | 0.68609  |
| H | 6.76148  | -0.32525 | -0.86211 |
| H | 6.06822  | -1.37258 | -2.10908 |
| H | 4.48743  | 0.14988  | 0.02474  |
| H | 2.32392  | -3.95006 | 0.0841   |
| H | 1.83379  | -3.20861 | -1.44616 |
| H | 0.29942  | -2.98426 | 0.59117  |
| H | 1.9522   | -0.51486 | 1.15573  |
| H | 2.31025  | -2.00548 | 2.01902  |
| H | 0.30573  | -1.99625 | 3.23281  |
| H | -0.5699  | -1.05147 | 2.04846  |
| H | 1.73832  | 0.34053  | 3.39307  |
| H | 0.34478  | 0.92382  | 5.41027  |
| H | 0.73388  | -0.80948 | 5.34581  |
| H | -0.88371 | -0.23255 | 4.89311  |
| H | -0.62111 | 3.2474   | 1.07893  |
| H | -0.40123 | 2.98932  | -1.42048 |
| H | 0.41896  | 1.45032  | -1.16721 |
| H | 4.61144  | 0.44892  | -3.0182  |
| H | 5.28134  | 1.58614  | -1.85385 |
| H | 2.31976  | 0.90598  | -2.16263 |
| H | 2.83519  | 1.63769  | 0.12891  |
| H | 3.72241  | 3.04163  | -0.47095 |
| H | 2.54133  | 5.07747  | -0.37467 |
| H | 0.69575  | 5.11344  | -0.44767 |



|   |          |          |          |
|---|----------|----------|----------|
| H | 3.24937  | 2.08703  | -4.15747 |
| H | 3.88151  | 3.37739  | -3.12001 |
| H | 2.13701  | 3.15226  | -3.28115 |
| H | -0.31505 | -0.88076 | -0.32689 |
| H | -3.48248 | 3.02872  | 0.91649  |
| H | -2.98231 | -1.94693 | -0.76677 |
| H | -5.92833 | 0.4163   | -0.69185 |
| H | -4.47994 | -3.58057 | -1.28758 |
| H | -6.06788 | -3.43131 | -0.50456 |
| H | -5.89089 | -2.9762  | -2.18605 |
| H | -7.71449 | -0.15402 | 0.92686  |
| H | -6.1093  | -0.55352 | 1.58794  |
| H | -7.17224 | -1.8416  | 0.97323  |
| H | -7.90637 | -0.6195  | -3.41956 |
| H | -6.91801 | 0.72101  | -2.7743  |
| H | -6.1376  | -0.80406 | -3.27176 |

**Compound 1c:** Isomer 2S, 5R, 11R, 13R, 17S, 23S conformer 57

|   |          |          |          |
|---|----------|----------|----------|
| C | 2.95366  | -2.39186 | -0.41162 |
| C | 3.96261  | -3.13259 | 0.11496  |
| C | 5.36282  | -2.80739 | -0.12497 |
| C | 5.58181  | -1.63042 | -1.07832 |
| C | 4.45235  | -0.60554 | -0.98998 |
| O | 3.15782  | -1.24953 | -1.11371 |
| C | 1.48755  | -2.68049 | -0.25686 |
| C | 0.88306  | -2.29331 | 1.13291  |
| C | 1.46807  | -0.98744 | 1.68961  |
| C | 0.79069  | -0.50581 | 2.98233  |
| C | 1.04774  | 0.99099  | 3.32443  |
| C | 0.15774  | 1.87948  | 2.46356  |
| C | 0.80984  | 1.28771  | 4.80843  |
| O | 0.5232   | 1.81113  | 1.15361  |
| O | -0.77713 | 2.54343  | 2.85237  |
| C | -0.33979 | 2.43449  | 0.17734  |
| C | 0.44026  | 2.42863  | -1.15163 |
| C | -1.64167 | 1.6913   | 0.06667  |
| C | 1.79712  | 3.11659  | -1.07205 |
| C | 4.54175  | 0.46908  | -2.07429 |

|   |          |          |          |
|---|----------|----------|----------|
| C | 3.33503  | 1.41714  | -2.24738 |
| C | 3.02676  | 2.23532  | -0.96655 |
| C | 1.88228  | 4.4512   | -1.09167 |
| C | 3.58655  | 2.33139  | -3.45617 |
| O | 6.3018   | -3.44301 | 0.33759  |
| O | -0.53124 | -2.22628 | 1.01225  |
| C | -2.90033 | 2.19413  | 0.02141  |
| O | -3.77279 | 1.15026  | -0.14534 |
| C | -2.99067 | 0.03222  | -0.18967 |
| N | -1.71304 | 0.30957  | -0.06966 |
| C | -3.55516 | -1.29333 | -0.32855 |
| C | -4.82918 | -1.66859 | -0.57389 |
| C | -5.99136 | -0.70199 | -0.73668 |
| C | -5.16811 | -3.1334  | -0.66203 |
| C | -6.65145 | -0.40155 | 0.62088  |
| O | -6.91562 | -1.30458 | -1.64545 |
| C | -7.80183 | -0.39372 | -2.2617  |
| H | 3.73544  | -4.02346 | 0.69084  |
| H | 6.5464   | -1.1637  | -0.85636 |
| H | 5.63968  | -2.03206 | -2.10073 |
| H | 4.46318  | -0.14942 | 0.0109   |
| H | 1.28248  | -3.74041 | -0.43768 |
| H | 0.9517   | -2.10426 | -1.0181  |
| H | 1.07859  | -3.11191 | 1.83675  |
| H | 1.37377  | -0.22133 | 0.91663  |
| H | 2.54172  | -1.12438 | 1.87     |
| H | 1.14922  | -1.10783 | 3.82746  |
| H | -0.28906 | -0.68181 | 2.91975  |
| H | 2.08964  | 1.2272   | 3.06677  |
| H | 0.97221  | 2.34583  | 5.03534  |
| H | 1.49222  | 0.69244  | 5.42433  |
| H | -0.21794 | 1.0438   | 5.09526  |
| H | -0.53892 | 3.4621   | 0.49602  |
| H | -0.19524 | 2.92679  | -1.89316 |
| H | 0.54564  | 1.38776  | -1.47524 |
| H | 4.71328  | -0.03589 | -3.03453 |
| H | 5.44735  | 1.05893  | -1.87144 |
| H | 2.46364  | 0.78886  | -2.46994 |
| H | 2.8853   | 1.54396  | -0.12658 |

|   |          |          |          |
|---|----------|----------|----------|
| H | 3.89858  | 2.85946  | -0.727   |
| H | 2.83686  | 4.9653   | -1.01331 |
| H | 1.00132  | 5.08401  | -1.18148 |
| H | 3.76318  | 1.7431   | -4.36429 |
| H | 4.4687   | 2.96473  | -3.29269 |
| H | 2.7364   | 2.99457  | -3.6417  |
| H | -0.75234 | -1.36579 | 0.59495  |
| H | -3.33127 | 3.17859  | 0.10647  |
| H | -2.8019  | -2.06648 | -0.20275 |
| H | -5.63131 | 0.23941  | -1.17038 |
| H | -4.2925  | -3.75679 | -0.46254 |
| H | -5.95556 | -3.39851 | 0.05501  |
| H | -5.56502 | -3.37408 | -1.65364 |
| H | -7.51003 | 0.26696  | 0.49641  |
| H | -5.93923 | 0.0855   | 1.29324  |
| H | -7.00312 | -1.32626 | 1.08976  |
| H | -8.39041 | -0.96698 | -2.98296 |
| H | -8.4907  | 0.07914  | -1.54628 |
| H | -7.25812 | 0.40114  | -2.79717 |
